# Supplementary material for: Catalytic activity of silicene biflakes for CO2 reduction: a theoretical approach
Source: Royal Society of Chemistry journal article supplement (doi:10.1039/d3cp01438j), 2023-01-01
Supplement: d3cp01438j1.pdf [file d3cp01438j1.pdf]

## Supporting information

### **Catalytic activity of silicene bilflake for CO<sub>2</sub> reduction: A theoretical approach**

Wilmer E. Vallejo Narváez\*, Cesar Gabriel Vera de la Garza, Serguei Fomine\*

Instituto de Investigaciones en Materiales, Universidad Nacional Autónoma de México,  
Apartado Postal 70-360, CU, Coyoacán, México DF 04510, México.

\*E-mail: [wilmervall@comunidad.unam.mx](mailto:wilmervall@comunidad.unam.mx)  
[fomine@unam.mx](mailto:fomine@unam.mx)

## Table of Contents

|                                                                |     |
|----------------------------------------------------------------|-----|
| 1. NBO analysis.....                                           | 3   |
| 2. CO <sub>2</sub> chemisorption on silicene monoflake .....   | 5   |
| 3. Hydrogen absorption on silicene biflake.....                | 6   |
| 4. XYZ coordinates.....                                        | 7   |
| 3.1 Mechanism with catalyst (silicene biflake).....            | 7   |
| 3.2 Hydrogen absorption on silicene biflake .....              | 135 |
| 3.2 CO <sub>2</sub> chemisorption on silicene monoflakes ..... | 144 |

## 1. NBO analysis

This analysis was carried out for silicene nanoflake (Figure 1 in the manuscript) to know the hybridization of silicon atoms. In the center of the nanoflake, Si (61,19) and Si (23, 65), the percentage of occupation is *s* orbital (26.42%), *p* orbital 2.77(73.29%) and *d* orbital 0.01(0.29%). This character is closer to  $sp^3$  hybridization (25 % *s* and 75 % *p*).

**Table S1** NBO analysis for silicene nanoflake.

| Atom No | Natural Electron Configuration    |
|---------|-----------------------------------|
| Si 1    | [core]3S( 0.58)3p( 1.33)3d( 0.01) |
| Si 2    | [core]3S( 0.58)3p( 1.33)3d( 0.01) |
| Si 3    | [core]3S( 0.60)3p( 1.44)3d( 0.01) |
| Si 4    | [core]3S( 0.58)3p( 1.31)3d( 0.01) |
| Si 5    | [core]3S( 0.60)3p( 1.44)3d( 0.01) |
| Si 6    | [core]3S( 0.58)3p( 1.30)3d( 0.01) |
| Si 7    | [core]3S( 0.60)3p( 1.44)3d( 0.01) |
| Si 8    | [core]3S( 0.58)3p( 1.33)3d( 0.01) |
| Si 9    | [core]3S( 0.59)3p( 1.35)3d( 0.01) |
| Si 10   | [core]3S( 0.60)3p( 1.44)3d( 0.01) |
| Si 11   | [core]3S( 0.59)3p( 1.40)3d( 0.01) |
| Si 12   | [core]3S( 0.59)3p( 1.40)3d( 0.01) |
| Si 13   | [core]3S( 0.59)3p( 1.40)3d( 0.01) |
| Si 14   | [core]3S( 0.58)3p( 1.33)3d( 0.01) |
| Si 15   | [core]3S( 0.58)3p( 1.31)3d( 0.01) |
| Si 16   | [core]3S( 0.59)3p( 1.40)3d( 0.01) |
| Si 17   | [core]3S( 0.59)3p( 1.40)3d( 0.01) |
| Si 18   | [core]3S( 0.59)3p( 1.40)3d( 0.01) |
| Si 19   | [core]3S( 0.60)3p( 1.44)3d( 0.01) |
| Si 20   | [core]3S( 0.58)3p( 1.30)3d( 0.01) |
| Si 21   | [core]3S( 0.59)3p( 1.40)3d( 0.01) |
| Si 22   | [core]3S( 0.59)3p( 1.40)3d( 0.01) |
| Si 23   | [core]3S( 0.59)3p( 1.40)3d( 0.01) |
| Si 24   | [core]3S( 0.60)3p( 1.44)3d( 0.01) |
| Si 25   | [core]3S( 0.59)3p( 1.40)3d( 0.01) |
| Si 26   | [core]3S( 0.59)3p( 1.40)3d( 0.01) |
| Si 27   | [core]3S( 0.59)3p( 1.40)3d( 0.01) |
| Si 28   | [core]3S( 0.60)3p( 1.44)3d( 0.01) |
| Si 29   | [core]3S( 0.58)3p( 1.30)3d( 0.01) |
| Si 30   | [core]3S( 0.60)3p( 1.44)3d( 0.01) |
| Si 31   | [core]3S( 0.59)3p( 1.40)3d( 0.01) |

Si 32 [core]3S( 0.59)3p( 1.40)3d( 0.01)  
Si 33 [core]3S( 0.59)3p( 1.40)3d( 0.01)  
Si 34 [core]3S( 0.58)3p( 1.31)3d( 0.01)  
Si 35 [core]3S( 0.59)3p( 1.40)3d( 0.01)  
Si 36 [core]3S( 0.59)3p( 1.40)3d( 0.01)  
Si 37 [core]3S( 0.59)3p( 1.40)3d( 0.01)  
Si 38 [core]3S( 0.60)3p( 1.44)3d( 0.01)  
Si 39 [core]3S( 0.60)3p( 1.44)3d( 0.01)  
Si 40 [core]3S( 0.60)3p( 1.44)3d( 0.01)  
Si 41 [core]3S( 0.60)3p( 1.44)3d( 0.01)  
Si 42 [core]3S( 0.58)3p( 1.33)3d( 0.01)  
Si 43 [core]3S( 0.58)3p( 1.30)3d( 0.01)  
Si 44 [core]3S( 0.58)3p( 1.31)3d( 0.01)  
Si 45 [core]3S( 0.58)3p( 1.33)3d( 0.01)  
Si 46 [core]3S( 0.58)3p( 1.33)3d( 0.01)  
Si 47 [core]3S( 0.58)3p( 1.33)3d( 0.01)  
Si 48 [core]3S( 0.59)3p( 1.35)3d( 0.01)  
H 49 1S( 0.54)  
H 50 1S( 0.54)  
H 51 1S( 0.54)  
H 52 1S( 0.55)  
H 53 1S( 0.55)  
H 54 1S( 0.54)  
H 55 1S( 0.54)  
H 56 1S( 0.55)  
H 57 1S( 0.54)  
H 58 1S( 0.55)  
H 59 1S( 0.54)  
H 60 1S( 0.54)  
H 61 1S( 0.55)  
H 62 1S( 0.55)  
H 63 1S( 0.54)  
H 64 1S( 0.54)  
H 65 1S( 0.55)  
H 66 1S( 0.55)

## 2. CO<sub>2</sub> chemisorption on silicene monoflake

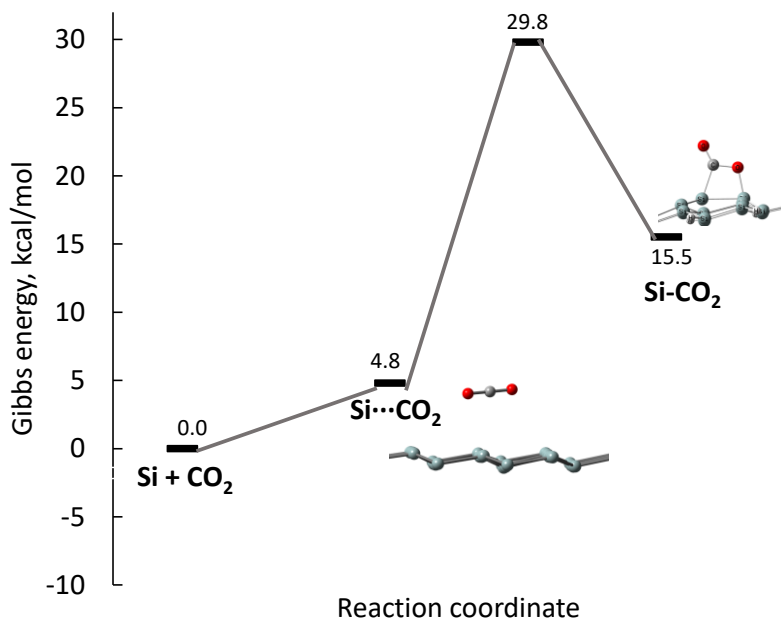

**Fig S1** Potential energy profile for CO<sub>2</sub> chemisorption on silicene monoflake (**Si**). The level of theory used was TPSS-D3BJ/def2-SVP. This result is not included in reference 12 (in the manuscript).

### 3. Hydrogen absorption on silicene bflake

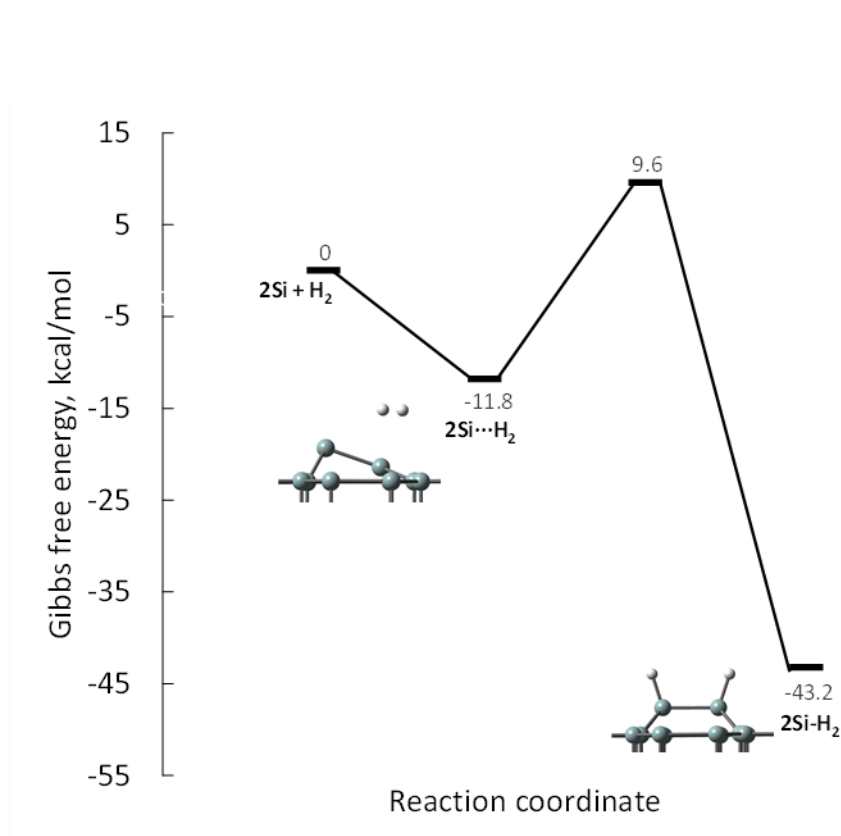

**Fig S2** Potential energy profile for hydrogen absorption on silicene bflake (**2Si**).

## 4. XYZ coordinates

### 3.1 Mechanism with catalyst (silicene bilflake)

- **H<sub>2</sub>**

|   |                    |                    |                   |
|---|--------------------|--------------------|-------------------|
| H | 0.0000000000000000 | 0.0000000000000000 | 0.37864129793633  |
| H | 0.0000000000000000 | 0.0000000000000000 | -0.37864129793633 |

- **H<sub>2</sub>O**

|   |                    |                   |                   |
|---|--------------------|-------------------|-------------------|
| O | 0.0000000000000000 | 0.000000000001365 | 0.12224060626212  |
| H | 0.0000000000000000 | 0.75884092207211  | -0.48857330312557 |
| H | 0.0000000000000000 | -0.75884092208576 | -0.48857330313655 |

- **CO<sub>2</sub>**

|   |                   |                   |                   |
|---|-------------------|-------------------|-------------------|
| C | 0.000000000003877 | -0.00000000000811 | 0.00000000034625  |
| O | -0.00000000001938 | 0.00000000000406  | 1.17218860700206  |
| O | -0.00000000001938 | 0.00000000000406  | -1.17218860734831 |

- **CO**

|   |                   |                  |                  |
|---|-------------------|------------------|------------------|
| O | 0.72386859160196  | 1.41630899000000 | 0.00000000000000 |
| C | -0.41574507160196 | 1.41630899000000 | 0.00000000000000 |

- **OCH<sub>2</sub>**

|   |                   |                   |                   |
|---|-------------------|-------------------|-------------------|
| C | -0.96315130632712 | 0.19313304230275  | 0.00000016130101  |
| O | -2.17147777496584 | 0.19313304104021  | -0.00000005387991 |
| H | -0.35778533121110 | 1.13974786524547  | -0.00000005371055 |
| H | -0.35778532749594 | -0.75348177858843 | -0.00000005371055 |

- **HCOOH**

|   |                   |                  |                   |
|---|-------------------|------------------|-------------------|
| C | -2.56625246748834 | 1.26938855444683 | -0.00000013224816 |
| H | -1.93379358788267 | 0.35474618035934 | 0.00000006501346  |
| O | -3.77405473013434 | 1.29087521951131 | 0.00000003731286  |
| O | -1.76905832553729 | 2.36013874680273 | -0.00000000336594 |
| H | -2.36664896895735 | 3.14015120887979 | 0.00000003328778  |

- **CH<sub>3</sub>OH**

|   |                   |                  |                   |
|---|-------------------|------------------|-------------------|
| C | -1.27728454145703 | 1.48779440557192 | 0.01547922362659  |
| H | -0.90383140730846 | 0.45006217043377 | 0.02693716166122  |
| H | -0.91897691224943 | 1.96518289895033 | -0.92247172536452 |
| H | -2.38762161963671 | 1.44669334912690 | -0.02275987825884 |
| O | -0.78405557728129 | 2.11935654884887 | 1.18426808084891  |
| H | -1.11083601206709 | 3.03576316706821 | 1.17962423748663  |

- **CH<sub>4</sub>**

|   |                   |                  |                   |
|---|-------------------|------------------|-------------------|
| C | -5.61678135628583 | 3.93092889385665 | -0.00000000028776 |
| H | -5.24949026675156 | 2.89204824128707 | 0.00000000021861  |
| H | -5.24947095693913 | 4.45034751626118 | 0.89969414926280  |
| H | -5.24947095611715 | 4.45034751680583 | -0.89969414976895 |
| H | -6.71866805390632 | 3.93093235178927 | 0.00000000057529  |

- **2Si**

|    |                   |                   |                   |
|----|-------------------|-------------------|-------------------|
| Si | 1.20247474378435  | 8.21298850854550  | -1.20203960607689 |
| Si | -1.20236546242911 | 8.21301474466727  | -1.20203961822291 |
| Si | -2.39793987189789 | 6.16355900300848  | -1.20166638849158 |
| Si | -4.77579335653157 | 6.29519259348327  | -1.20985574134475 |
| Si | -5.82243081173303 | 4.15602772552052  | -1.20200788272549 |
| Si | -8.19501919903191 | 4.12542210841360  | -1.20073360159736 |
| Si | -9.35349527484054 | 2.02082242973923  | -1.20224850739299 |
| Si | 2.39800217626514  | 6.16352043165584  | -1.20166937880978 |
| Si | -1.18163670616202 | 4.13898481715216  | -1.20414484156356 |
| Si | -4.66990377206239 | 2.09232673562123  | -1.20304454661666 |
| Si | -8.11720783104630 | -0.00026208265043 | -1.20330178716950 |
| Si | 4.77585386340981  | 6.29533030501847  | -1.20986326918417 |
| Si | 1.18162640087755  | 4.13898165804908  | -1.20413769639135 |
| Si | -2.31278356074874 | 2.06917277021606  | -1.19921618146178 |
| Si | -5.76536404991747 | -0.00015159172011 | -1.20756432203831 |
| Si | -9.35385971951136 | -2.02110832931550 | -1.20227014328981 |
| Si | -8.19548251141777 | -4.12575452676210 | -1.20073593859385 |
| Si | -4.67001480697544 | -2.09269124566925 | -1.20302715506820 |
| Si | -1.17763104542885 | 0.00003628986566  | -1.20231754863542 |
| Si | 2.31287807139730  | 2.06922444265666  | -1.19921730252204 |
| Si | 5.82262047440966  | 4.15623650885827  | -1.20201011811014 |
| Si | 4.66999927763184  | 2.09257089786833  | -1.20303738090949 |
| Si | 1.17767351646792  | 0.00010517329939  | -1.20231400429990 |
| Si | -2.31289704534429 | -2.06904679468343 | -1.19923462321340 |
| Si | -5.82288797978929 | -4.15621174192479 | -1.20203443123630 |



|    |                   |                   |                   |
|----|-------------------|-------------------|-------------------|
| Si | 8.19520093274564  | 4.12552543813750  | -1.20072494960194 |
| Si | 9.35353859705463  | 2.02085471082503  | -1.20224769725915 |
| Si | 5.76529938388506  | 0.00002244849502  | -1.20756741995187 |
| Si | 2.31286454802670  | -2.06901769418007 | -1.19923141354859 |
| Si | -1.18165597089288 | -4.13881640299150 | -1.20414421000559 |
| Si | -4.77596500516839 | -6.29523436347123 | -1.20988443685167 |
| Si | 8.11714330910407  | -0.00017259113792 | -1.20329190652128 |
| Si | 4.66998419325965  | -2.09253775965521 | -1.20304588091685 |
| Si | 1.18159328972542  | -4.13878604358010 | -1.20414477470594 |
| Si | -2.39812052879592 | -6.16329587390971 | -1.20170665357243 |
| Si | 9.35376595385924  | -2.02103923706577 | -1.20226078203527 |
| Si | 5.82278768814429  | -4.15609952301162 | -1.20204848814253 |
| Si | 2.39804677323940  | -6.16327386711324 | -1.20171589925789 |
| Si | -1.20244885641653 | -8.21268804844669 | -1.20207626157564 |
| Si | 8.19537013354639  | -4.12567803922071 | -1.20073751732128 |
| Si | 4.77590176079170  | -6.29515740965315 | -1.20989756789788 |
| Si | 1.20238522097610  | -8.21267489023015 | -1.20208007121505 |
| Si | 1.20247881178076  | 8.21298549087714  | 1.20207342317193  |
| Si | -1.20236092363978 | 8.21301122470808  | 1.20207859783399  |
| Si | -2.39793494232098 | 6.16355606132353  | 1.20170163262882  |
| Si | -4.77578969092330 | 6.29519454286307  | 1.20989861643816  |
| Si | -5.82243058138265 | 4.15603382410258  | 1.20203800241090  |
| Si | -8.19501629825192 | 4.12542844148134  | 1.20072234177315  |
| Si | -9.35347943079777 | 2.02082359154476  | 1.20226910443775  |
| Si | 2.39800239640633  | 6.16351447983067  | 1.20169536353900  |
| Si | -1.18163837020749 | 4.13897854280168  | 1.20416407543322  |
| Si | -4.66992044859296 | 2.09232112021098  | 1.20302695808341  |
| Si | -8.11721283830735 | -0.00027132123518 | 1.20335479433576  |
| Si | 4.77585536203944  | 6.29531467254764  | 1.20988767215306  |
| Si | 1.18162596410140  | 4.13897676944050  | 1.20415269194933  |
| Si | -2.31279229485817 | 2.06916664549350  | 1.19922685006830  |
| Si | -5.76537164876465 | -0.00016088773891 | 1.20754577019747  |
| Si | -9.35385510255705 | -2.02112065339339 | 1.20227099142843  |
| Si | -8.19548695842354 | -4.12577242196291 | 1.20070789829158  |
| Si | -4.67001501962376 | -2.09269684023774 | 1.20301893329817  |
| Si | -1.17763007562963 | 0.00003440367467  | 1.20232403493894  |
| Si | 2.31288117163760  | 2.06922211640898  | 1.19922671576434  |
| Si | 5.82262874448524  | 4.15622896535853  | 1.20203798264156  |
| Si | 4.67000421779353  | 2.09256747209213  | 1.20302735235244  |
| Si | 1.17767677716135  | 0.00010571732653  | 1.20232254244945  |
| Si | -2.31289576250196 | -2.06905202553130 | 1.19923515708541  |
| Si | -5.82289369020752 | -4.15621239907291 | 1.20201821636327  |
| Si | 8.19520398726084  | 4.12552811813485  | 1.20073389467221  |
| Si | 9.35353687488062  | 2.02085804136614  | 1.20226486543845  |

|    |                    |                   |                   |
|----|--------------------|-------------------|-------------------|
| Si | 5.76530859333045   | 0.00001656061786  | 1.20753120969182  |
| Si | 2.31284923853089   | -2.06902190342366 | 1.19922308948016  |
| Si | -1.18165520132807  | -4.13882243048394 | 1.20413065420820  |
| Si | -4.77596620123541  | -6.29522823192935 | 1.20985462646478  |
| Si | 8.11715734917288   | -0.00017759339127 | 1.20336485410077  |
| Si | 4.66997810400290   | -2.09254035934081 | 1.20300416470012  |
| Si | 1.18160117221733   | -4.13879746515024 | 1.20413646776500  |
| Si | -2.39812029098005  | -6.16330664766407 | 1.20168041499732  |
| Si | 9.35375255324523   | -2.02105897517683 | 1.20227472058931  |
| Si | 5.82278009316985   | -4.15610145293727 | 1.20199930475307  |
| Si | 2.39805649146062   | -6.16328953052345 | 1.20166733273724  |
| Si | -1.20244061739997  | -8.21269285084252 | 1.20204118616598  |
| Si | 8.19535980895662   | -4.12569828612845 | 1.20070619256053  |
| Si | 4.77590727718250   | -6.29515819347649 | 1.20983990446398  |
| Si | 1.20238947878459   | -8.21268395691938 | 1.20203824175676  |
| H  | -1.75597781129002  | 9.33030874383997  | 2.03415601829368  |
| H  | -1.75598449407319  | 9.33031587498513  | -2.03411065432537 |
| H  | 5.39908749409495   | 7.35402309893217  | -2.06771494285923 |
| H  | 8.90228392840739   | 5.14752451792201  | -2.03883312750749 |
| H  | 8.90235244212588   | -5.14779393373578 | -2.03888882458004 |
| H  | 5.39906755342164   | -7.35384345814459 | -2.06771836060915 |
| H  | 1.75599142981910   | -9.33001338991748 | -2.03416284494812 |
| H  | -1.75604533696193  | -9.33002765314719 | -2.03416416422638 |
| H  | -5.39917195513426  | -7.35394611783875 | -2.06773111846100 |
| H  | -8.90250732911776  | -5.14781930518964 | -2.03885361737304 |
| H  | -8.90203202000284  | 5.14740876221332  | -2.03882669477164 |
| H  | -5.39906362730864  | 7.35383199054494  | -2.06769362403268 |
| H  | -5.39907992336110  | 7.35385809786625  | 2.06776393208494  |
| H  | -8.90204117088181  | 5.14745870764554  | 2.03883058349581  |
| H  | -8.90248686539955  | -5.14781741775230 | 2.03879661445126  |
| H  | -5.39914347737120  | -7.35391970269045 | 2.06766026067784  |
| H  | -1.75600082926484  | -9.32997367669210 | 2.03408245426225  |
| H  | 1.75595443141025   | -9.32999477989317 | 2.03408666740098  |
| H  | 5.39910508958656   | -7.35388158265934 | 2.06766476449719  |
| H  | 8.90231661212454   | -5.14778700976233 | 2.03883878626187  |
| H  | 8.90228926193654   | 5.14752235754995  | 2.03884296560280  |
| H  | 5.39907551344207   | 7.35400912611472  | 2.06773086979473  |
| H  | 1.75611463981510   | 9.33027359032741  | -2.03411797058887 |
| H  | 1.75612143499330   | 9.33026747403500  | 2.03415441076599  |
| H  | 10.59127482904466  | 2.06786255311518  | 2.04450755121939  |
| H  | 10.59127072967306  | 2.06784855174299  | -2.04449570145431 |
| H  | 10.59148377439335  | -2.06795836414018 | 2.04456461873169  |
| H  | 10.59146070999249  | -2.06791322361768 | -2.04452992877486 |
| H  | -10.59120005100337 | 2.06787006294049  | 2.04453095897393  |

|   |                    |                   |                   |
|---|--------------------|-------------------|-------------------|
| H | -10.59127532973881 | 2.06785418473310  | -2.04452976385854 |
| H | -10.59159482939339 | -2.06797272695400 | -2.04458767091450 |
| H | -10.59157984610531 | -2.06799941272218 | 2.04456865450381  |

• **2Si...CO<sub>2</sub>**

|    |                   |                   |                   |
|----|-------------------|-------------------|-------------------|
| Si | 1.19855271045677  | 8.23313366411815  | -1.28383415028856 |
| Si | -1.20687127024597 | 8.23242706579336  | -1.28310242049485 |
| Si | -2.40492587530552 | 6.18413283279655  | -1.28761501750322 |
| Si | -4.78366916946267 | 6.30122775710367  | -1.29326915859053 |
| Si | -5.81460269167557 | 4.15427513702566  | -1.28784416911325 |
| Si | -8.18668895499461 | 4.12172311637965  | -1.28377758879926 |
| Si | -9.33592958662051 | 2.01250065825806  | -1.28449115830596 |
| Si | 2.39809279335705  | 6.18572337565747  | -1.28933323941680 |
| Si | -1.18397908993604 | 4.16222074091669  | -1.29544924698599 |
| Si | -4.65002734574799 | 2.09678242951252  | -1.29310677142919 |
| Si | -8.08906040940404 | -0.00168283929098 | -1.28870621419537 |
| Si | 4.77685255578082  | 6.30406038866883  | -1.29669012235029 |
| Si | 1.17989157747111  | 4.16219054533756  | -1.29630283967666 |
| Si | -2.29233941047265 | 2.07971855149198  | -1.29799392880120 |
| Si | -5.73713380953280 | -0.00114063693467 | -1.29572494034598 |
| Si | -9.33498244489166 | -2.01645488346879 | -1.28485689803568 |
| Si | -8.18472808374376 | -4.12513057464034 | -1.28451055496747 |
| Si | -4.64907644340077 | -2.09858070404113 | -1.29349750692805 |
| Si | -1.17669592056467 | -0.00018366251956 | -1.32609215992936 |
| Si | 2.29236261656836  | 2.08190567008637  | -1.29859145508410 |
| Si | 5.80997920215990  | 4.15815218418102  | -1.29189247276519 |
| Si | 4.65010026818106  | 2.09802155564077  | -1.29637061676498 |
| Si | 1.17936533652181  | 0.00025799035282  | -1.32624744389330 |
| Si | -2.29138319852608 | -2.08058635726733 | -1.29805753529745 |
| Si | -5.81261390097921 | -4.15664354482236 | -1.28849619915650 |
| Si | 8.18225771846190  | 4.12665226440692  | -1.28957051327276 |
| Si | 9.33405931202926  | 2.01855789965148  | -1.29150236179502 |
| Si | 5.73917277826022  | 0.00129802098146  | -1.29982929518031 |
| Si | 2.29327770249611  | -2.08085857036126 | -1.29883982031406 |
| Si | -1.18207000654109 | -4.16258885072870 | -1.29591862159577 |
| Si | -4.78077255851970 | -6.30318849919576 | -1.29425222773633 |
| Si | 8.09114434877013  | 0.00178257127151  | -1.29473240589212 |
| Si | 4.65099507258458  | -2.09587662589118 | -1.29668984973864 |
| Si | 1.18176894974430  | -4.16161325647090 | -1.29690015035236 |
| Si | -2.40208334186995 | -6.18506293907829 | -1.28845816366127 |
| Si | 9.33506646898657  | -2.01436985053867 | -1.29168490766748 |
| Si | 5.81193532652118  | -4.15542517921952 | -1.29228643601745 |
| Si | 2.40102782527316  | -6.18451675652840 | -1.29002842505652 |

|    |                   |                   |                   |
|----|-------------------|-------------------|-------------------|
| Si | -1.20304309459793 | -8.23277638413710 | -1.28411134230328 |
| Si | 8.18420934313121  | -4.12296733475553 | -1.29001362092239 |
| Si | 4.77982742941676  | -6.30182856647562 | -1.29742654351756 |
| Si | 1.20238187041789  | -8.23244962177902 | -1.28479294958328 |
| Si | 1.19909105859323  | 8.22774597100347  | 1.12008383094288  |
| Si | -1.20572081928607 | 8.22708159299878  | 1.12076461466020  |
| Si | -2.40286759259656 | 6.17851855756280  | 1.11579915068410  |
| Si | -4.78127974740649 | 6.29697037951604  | 1.12626298938246  |
| Si | -5.81122275195878 | 4.15034233437424  | 1.11629033969131  |
| Si | -8.18354659672562 | 4.11976533070085  | 1.11809720191958  |
| Si | -9.33332070446674 | 2.01168237342986  | 1.11986286794711  |
| Si | 2.39792687586206  | 6.18007546393512  | 1.11398992340283  |
| Si | -1.18253975581593 | 4.15715938018682  | 1.11156015766467  |
| Si | -4.64603161662756 | 2.09400926713946  | 1.11201151403322  |
| Si | -8.08573602263116 | -0.00186483284648 | 1.11854095642536  |
| Si | 4.77622590502484  | 6.29993297808580  | 1.12299475924556  |
| Si | 1.18017975081071  | 4.15716455932798  | 1.11104582608871  |
| Si | -2.28953229859206 | 2.07542515934987  | 1.10226751281595  |
| Si | -5.73404617350150 | -0.00134751511363 | 1.12023160650727  |
| Si | -9.33236367780946 | -2.01599907443354 | 1.11950696133246  |
| Si | -8.18159804721443 | -4.12354970516507 | 1.11736019484285  |
| Si | -4.64508234425388 | -2.09620306440209 | 1.11164453679812  |
| Si | -1.17781297926983 | -0.00030181586537 | 1.07420317522472  |
| Si | 2.29145539725800  | 2.07772255148462  | 1.10173368767469  |
| Si | 5.80842749275549  | 4.15429026081074  | 1.11217130718473  |
| Si | 4.64779232091284  | 2.09536342823110  | 1.10872388536199  |
| Si | 1.18251408206509  | 0.00015078633699  | 1.07316193124194  |
| Si | -2.28859103160671 | -2.07654925395399 | 1.10216275188446  |
| Si | -5.80926248069003 | -4.15310377576432 | 1.11561952378425  |
| Si | 8.18089426123018  | 4.12442950305338  | 1.11228979198235  |
| Si | 9.33340355766213  | 2.01757962914536  | 1.11275445815105  |
| Si | 5.73776512989450  | 0.00113672842739  | 1.11643859021757  |
| Si | 2.29236260921383  | -2.07694849822808 | 1.10142818545519  |
| Si | -1.18071769577815 | -4.15782246186804 | 1.11107722605616  |
| Si | -4.77843454175403 | -6.29929002962679 | 1.12529867453257  |
| Si | 8.08955583650357  | 0.00165393004214  | 1.11250992305120  |
| Si | 4.64871026072151  | -2.09357909255028 | 1.10841182657803  |
| Si | 1.18201461462591  | -4.15686835580688 | 1.11042693602515  |
| Si | -2.40007252265599 | -6.17977129283232 | 1.11496038163110  |
| Si | 9.33438574153046  | -2.01366175001638 | 1.11257456532497  |
| Si | 5.81038915060495  | -4.15189070245396 | 1.11176149986333  |
| Si | 2.40081226890288  | -6.17913669433665 | 1.11328973322561  |
| Si | -1.20190858528284 | -8.22774887236292 | 1.11975034344659  |
| Si | 8.18283059190951  | -4.12102569476903 | 1.11184971073750  |

|    |                    |                   |                   |
|----|--------------------|-------------------|-------------------|
| Si | 4.77915718089593   | -6.29796632232151 | 1.12225864905934  |
| Si | 1.20290387938129   | -8.22735455639704 | 1.11911813538408  |
| H  | -1.76010262907829  | 9.34289786124761  | 1.95432391957050  |
| H  | -1.75936331984924  | 9.35372946716168  | -2.11055704285798 |
| H  | 5.40680452969856   | 7.36030300088740  | -2.15273748132606 |
| H  | 8.89071827003099   | 5.14717160285844  | -2.12826694359551 |
| H  | 8.89305117077134   | -5.14312628228672 | -2.12882609964731 |
| H  | 5.41024352458820   | -7.35767617158800 | -2.15361715106856 |
| H  | 1.75418833694637   | -9.35384127042277 | -2.11258533453439 |
| H  | -1.75496960344036  | -9.35426882753980 | -2.11169120879943 |
| H  | -5.41162545157821  | -7.35888091772169 | -2.15029035809933 |
| H  | -8.89383884355317  | -5.14518671280853 | -2.12319204285423 |
| H  | -8.89630475279448  | 5.14157439264768  | -2.12228258459427 |
| H  | -5.41497442776966  | 7.35680313786645  | -2.14912435973222 |
| H  | -5.41005532642257  | 7.35000706789807  | 1.98706706156913  |
| H  | -8.88802805243156  | 5.14057832545379  | 1.95976942650285  |
| H  | -8.88567038477414  | -5.14480853220147 | 1.95883587209671  |
| H  | -5.40683083717487  | -7.35269629319009 | 1.98592960850058  |
| H  | -1.75586325297625  | -9.34391590970008 | 1.95312797425251  |
| H  | 1.75753384826758   | -9.34364795168955 | 1.95186991159747  |
| H  | 5.40843019573997   | -7.35131007669181 | 1.98234489524799  |
| H  | 8.88798506321521   | -5.14184586001920 | 1.95297332785657  |
| H  | 8.88563585218398   | 5.14543930535449  | 1.95353285043740  |
| H  | 5.40509868911645   | 7.35342022620945  | 1.98319776345297  |
| H  | 1.74990833231366   | 9.35485201170498  | -2.11148275202669 |
| H  | 1.75322228826490   | 9.34420578729186  | 1.95294778273621  |
| H  | -10.57425449595092 | -2.05717167817096 | -2.12740349840782 |
| H  | -10.56976603949391 | -2.05483669377983 | 1.96484951125874  |
| H  | -10.57075393830292 | 2.04973525878466  | 1.96519731147073  |
| H  | -10.57521696758326 | 2.05286233175264  | -2.12703045929528 |
| H  | 10.57289218136632  | -2.05378633272820 | 1.95622652029988  |
| H  | 10.57191669461761  | 2.05824616246515  | 1.95637404727749  |
| H  | 10.57406613587206  | -2.05642411743923 | -2.13454720049444 |
| H  | 10.57301999993318  | 2.06132486793136  | -2.13438224759765 |
| C  | 0.01849171364491   | -0.00431425520540 | 4.37370277520454  |
| O  | 1.19072869837652   | -0.00529658604576 | 4.39966011206140  |
| O  | -1.15407178176609  | -0.00335192380242 | 4.35228769980012  |

- **2Si-CO<sub>2</sub>**

|    |                   |                   |                   |
|----|-------------------|-------------------|-------------------|
| Si | -1.18267514224816 | -8.02742476912802 | -1.08741772772596 |
| Si | 1.20872678843749  | -8.00896921984634 | -1.08812799231105 |
| Si | 2.37621021031325  | -5.94670540160543 | -1.10026003379922 |
| Si | 4.73185959913967  | -6.21313780849723 | -1.19760606109273 |

|                      |                   |                   |
|----------------------|-------------------|-------------------|
| Si 5.89001163227678  | -4.13616222865108 | -1.25374733831531 |
| Si 8.26203401707588  | -4.12626749869339 | -1.44055566937854 |
| Si 9.47879748964886  | -2.05528073084962 | -1.49218629768659 |
| Si -2.36239578874461 | -5.97349911923817 | -1.10297600310661 |
| Si 1.18271560453602  | -3.91459970014715 | -1.04449058062573 |
| Si 4.80715713671105  | -2.03456865570752 | -1.14246229397284 |
| Si 8.30664781971107  | 0.00126649859374  | -1.40229175893900 |
| Si -4.72192732500784 | -6.22887554897421 | -1.20830591196204 |
| Si -1.16697685001764 | -3.94150463099523 | -1.06040440738664 |
| Si 2.45135964896254  | -1.94516218196800 | -0.99121895068541 |
| Si 5.96959732800540  | 0.00064695999508  | -1.23517620177046 |
| Si 9.47831808322805  | 2.05804577428720  | -1.49199563331683 |
| Si 8.26030488661708  | 4.12826007851914  | -1.44007016205091 |
| Si 4.80570072800867  | 2.03499477886458  | -1.14194427995663 |
| Si 1.13165130692233  | -0.00081653140176 | -0.68600174100331 |
| Si -2.45244073520012 | -1.98523178776283 | -1.05061441055484 |
| Si -5.88716665627492 | -4.15582446014980 | -1.26967483973188 |
| Si -4.80569416748370 | -2.05154315624495 | -1.18739081416764 |
| Si -1.19028632881433 | 0.00024046178894  | -0.80669778572247 |
| Si 2.45002253799132  | 1.94456397121934  | -0.99047905380977 |
| Si 5.88831176814525  | 4.13666180885957  | -1.25327416343919 |
| Si -8.25864667160626 | -4.13793151241447 | -1.43886485169552 |
| Si -9.46642731337517 | -2.05931058753615 | -1.49254331999599 |
| Si -5.95243797379701 | -0.00054449660643 | -1.26585391307953 |
| Si -2.45356372733896 | 1.98504430935196  | -1.05064497142675 |
| Si 1.18083038535362  | 3.91370106629028  | -1.04422934074378 |
| Si 4.72954160650520  | 6.21324315997823  | -1.19713146450028 |
| Si -8.29539825395374 | -0.00071729447125 | -1.41138932651918 |
| Si -4.80686977365941 | 2.05115152658671  | -1.18762434312049 |
| Si -1.16883312504336 | 3.94176636592812  | -1.06030225739296 |
| Si 2.37399652646202  | 5.94602653722189  | -1.10005033256397 |
| Si -9.46756500838532 | 2.05719429407508  | -1.49292602417626 |
| Si -5.88929029870747 | 4.15496234087573  | -1.27028905116157 |
| Si -2.36489995938502 | 5.97336446914106  | -1.10328770568555 |
| Si 1.20637830257366  | 8.00822766665204  | -1.08829501112857 |
| Si -8.26077587252681 | 4.13641727056784  | -1.43948175053921 |
| Si -4.72448781899790 | 6.22827700036651  | -1.20893713052783 |
| Si -1.18501356213626 | 8.02719712601703  | -1.08773951485933 |
| Si -1.19382489538622 | -7.98971031916790 | 1.31573421449082  |
| Si 1.22081776174671  | -7.97665117063092 | 1.31607632139127  |
| Si 2.44711793890424  | -5.94565096532120 | 1.29985208888486  |
| Si 4.82477754674282  | -6.21959513996597 | 1.22206805956844  |
| Si 6.07150487686499  | -4.18888167016892 | 1.14068946295797  |
| Si 8.43671648240905  | -4.16865884565410 | 0.95366527355454  |

|    |                   |                   |                   |
|----|-------------------|-------------------|-------------------|
| Si | 9.62737714959867  | -2.06950046418381 | 0.90770551362340  |
| Si | -2.43732448905984 | -5.96955878508151 | 1.29628864356129  |
| Si | 1.20091214159366  | -3.91436546068719 | 1.37675064724934  |
| Si | 5.01611714232984  | -2.09580506419823 | 1.25801568386891  |
| Si | 8.46059561050175  | 0.00113001205572  | 0.99564947503441  |
| Si | -4.81643133216536 | -6.23034130494198 | 1.21111470310438  |
| Si | -1.20476344862786 | -3.93256754520461 | 1.36486919584681  |
| Si | 2.67990573709735  | -2.05632800752297 | 1.38645413361597  |
| Si | 6.11059453650174  | 0.00056130922315  | 1.17415674685823  |
| Si | 9.62677897782160  | 2.07204225856758  | 0.90791631219487  |
| Si | 8.43489802071895  | 4.17051071734164  | 0.95415798295785  |
| Si | 5.01446393386429  | 2.09611516371730  | 1.25856945797853  |
| Si | 1.65605726435078  | -0.00070731214116 | 1.70042861974132  |
| Si | -2.66339641751627 | -2.06437557527468 | 1.33151072943185  |
| Si | -6.05263910630473 | -4.19171213476174 | 1.12619956888540  |
| Si | -4.99862501467186 | -2.09557329762472 | 1.21757305535605  |
| Si | -1.62262100102650 | 0.00041851075175  | 1.56227359251175  |
| Si | 2.67816176708664  | 2.05598510869566  | 1.38722152160452  |
| Si | 6.06968370256839  | 4.18930990294041  | 1.14116453321665  |
| Si | -8.41967833844959 | -4.16968417171603 | 0.95698880676898  |
| Si | -9.60724100741974 | -2.06935595742242 | 0.90739195246518  |
| Si | -6.09016333846132 | -0.00046617540147 | 1.14736717405048  |
| Si | -2.66480158382200 | 2.06434433242341  | 1.33152353502424  |
| Si | 1.19874876109762  | 3.91375211398353  | 1.37703978155947  |
| Si | 4.82229110361255  | 6.21964050862734  | 1.22251738778549  |
| Si | -8.43959040383880 | -0.00058396366445 | 0.98582503913592  |
| Si | -4.99996015443394 | 2.09533917223354  | 1.21724528908339  |
| Si | -1.20691932964158 | 3.93303843802190  | 1.36490833115731  |
| Si | 2.44468830406074  | 5.94521221526752  | 1.30005391493056  |
| Si | -9.60844100025408 | 2.06749917508407  | 0.90700821767966  |
| Si | -6.05482885678276 | 4.19101237538344  | 1.12558335397178  |
| Si | -2.44006922405242 | 5.96964877496090  | 1.29600721167459  |
| Si | 1.21833375282929  | 7.97620353727891  | 1.31591822172011  |
| Si | -8.42185578999556 | 4.16836763139567  | 0.95635100656692  |
| Si | -4.81921089138311 | 6.23000086165914  | 1.21047021733538  |
| Si | -1.19631437877768 | 7.98964896920611  | 1.31539596749326  |
| H  | 1.73946655978382  | -9.09710399739492 | 2.16724617876276  |
| H  | 1.80586424786846  | -9.10190703781745 | -1.92195609171590 |
| H  | -5.22545458505442 | -7.33887554807229 | -2.07934234712797 |
| H  | -8.88882775193679 | -5.16237670043456 | -2.33328769893762 |
| H  | -8.89132153173715 | 5.16047187031008  | -2.33409170075086 |
| H  | -5.22804090627855 | 7.33821268482810  | -2.08004208016560 |
| H  | -1.76492744162491 | 9.12903639774490  | -1.92178349694904 |
| H  | 1.80372944634504  | 9.10103470079153  | -1.92214789905871 |

|   |                    |                   |                   |
|---|--------------------|-------------------|-------------------|
| H | 5.23643206091909   | 7.31853661171435  | -2.07212680417501 |
| H | 8.87576590579527   | 5.15579963510798  | -2.34110333866859 |
| H | 8.87826185459659   | -5.15323943087171 | -2.34171182493353 |
| H | 5.23906477428953   | -7.31831068567599 | -2.07256946242079 |
| H | 5.39440848223383   | -7.33098784861775 | 2.05011925275379  |
| H | 9.21322051256557   | -5.20384960720211 | 1.70973561723264  |
| H | 9.21082152467825   | 5.20602991464662  | 1.71037868466264  |
| H | 5.39154170485893   | 7.33109255868987  | 2.05075384174824  |
| H | 1.73697926557796   | 9.09679348493253  | 2.16691657673645  |
| H | -1.70290816116182  | 9.11261800606916  | 2.17020543138459  |
| H | -5.40200082284432  | 7.33643948376286  | 2.03589381362184  |
| H | -9.19339225516070  | 5.20113429585519  | 1.72082145811202  |
| H | -9.19098221701868  | -5.20259488806208 | 1.72150827177054  |
| H | -5.39880377183315  | -7.33679109702804 | 2.03681672364459  |
| H | -1.76289789389620  | -9.12919990881803 | -1.92133177691517 |
| H | -1.70054075070620  | -9.11255114699081 | 2.17064254600384  |
| C | -0.60785818056927  | -0.00044995961779 | 3.21082163186427  |
| O | -1.22194597545749  | 0.00440343944802  | 4.25789328688165  |
| O | 0.74073790273961   | -0.00170574714740 | 3.17888145079362  |
| H | 10.66901402229153  | 2.13292670565331  | -2.40098734147682 |
| H | 10.91917665383605  | 2.17524746891606  | 1.66284825111515  |
| H | 10.91993519744444  | -2.17222304914728 | 1.66243290217701  |
| H | 10.66960831453462  | -2.12961183370057 | -2.40108340578153 |
| H | -10.89957593112709 | 2.16213709664536  | 1.66510685818117  |
| H | -10.89831959093759 | -2.16465200011710 | 1.66550685429582  |
| H | -10.66153313245065 | 2.13455509925836  | -2.39769314483684 |
| H | -10.66038237471525 | -2.13747082003217 | -2.39726380209241 |

• **2Si-CO<sub>2</sub> + H<sub>2</sub>**

|    |                   |                   |                   |
|----|-------------------|-------------------|-------------------|
| Si | -1.14339024623262 | -8.04984677808741 | -1.16004314108279 |
| Si | 1.24851010272970  | -8.03034999093155 | -1.16726388781474 |
| Si | 2.41866965525407  | -5.96920709557202 | -1.16537410290307 |
| Si | 4.77595415490892  | -6.22279509771427 | -1.27128085166847 |
| Si | 5.92983742657824  | -4.14271511409997 | -1.31048090292316 |
| Si | 8.30119170523303  | -4.13064853183064 | -1.50323823937824 |
| Si | 9.51245753052790  | -2.05632295803430 | -1.53665988758359 |
| Si | -2.33190040305194 | -6.00062175244283 | -1.15509639396155 |
| Si | 1.21416241268895  | -3.94462880091548 | -1.08568826543673 |
| Si | 4.83350722774317  | -2.04977840409027 | -1.17342636661671 |
| Si | 8.33338123352885  | -0.00501656714055 | -1.42079376225447 |
| Si | -4.69237687087745 | -6.25335435897526 | -1.25424320898478 |
| Si | -1.13525898453340 | -3.96993848754043 | -1.09549018424166 |
| Si | 2.47755366453665  | -1.97235060001921 | -1.01859028530589 |



|    |                   |                   |                   |
|----|-------------------|-------------------|-------------------|
| Si | 5.99680172179701  | -0.01385083476583 | -1.24837962049160 |
| Si | 9.49991466980118  | 2.05538573652924  | -1.49314463371178 |
| Si | 8.27457349699620  | 4.12005105542524  | -1.41640842991169 |
| Si | 4.81924753100159  | 2.01159306339737  | -1.12972560631291 |
| Si | 1.15449807031861  | -0.03456574502549 | -0.69147031247083 |
| Si | -2.42732057614587 | -2.01863999528736 | -1.06303990295962 |
| Si | -5.86412547165927 | -4.18338837720592 | -1.29260673043470 |
| Si | -4.78015661599546 | -2.08165878528220 | -1.19186643475454 |
| Si | -1.16749671054149 | -0.03429579376394 | -0.79793447326984 |
| Si | 2.46441067112143  | 1.91848107004117  | -0.97661720485270 |
| Si | 5.90345164626276  | 4.11303401273879  | -1.22426892600688 |
| Si | -8.23584679886122 | -4.18011835686853 | -1.45629737811688 |
| Si | -9.45623561271445 | -2.10867825796970 | -1.48750040983864 |
| Si | -5.94846402353607 | -0.04251417526348 | -1.25268987840628 |
| Si | -2.43988463368615 | 1.94694812047365  | -1.02479274883640 |
| Si | 1.19170495441986  | 3.88569371967846  | -1.00510420778212 |
| Si | 4.74107602995590  | 6.18671066903019  | -1.14383014268957 |
| Si | -8.29223019056570 | -0.04708345412694 | -1.38863169063463 |
| Si | -4.79324278661164 | 2.00253043538902  | -1.15197105826505 |
| Si | -1.15775906739966 | 3.90481872947976  | -1.01690293203718 |
| Si | 2.38557723600809  | 5.91792746965827  | -1.04394789649631 |
| Si | -9.46709818654411 | 2.01006692987045  | -1.44838334000256 |
| Si | -5.88685575715958 | 4.10094063159064  | -1.21391717084263 |
| Si | -2.36369595515326 | 5.93076612017997  | -1.03811050068354 |
| Si | 1.20718036992540  | 7.97385545097584  | -1.00972948799910 |
| Si | -8.25857625043988 | 4.08751033231409  | -1.37777833613395 |
| Si | -4.72519247330888 | 6.17548844058967  | -1.13460366207486 |
| Si | -1.18456776954414 | 7.98497183572543  | -1.00418679070784 |
| Si | -1.14810522145959 | -8.03272566549663 | 1.24339626343803  |
| Si | 1.26700135182470  | -8.01887333983011 | 1.23696340425983  |
| Si | 2.49668788832958  | -5.98952538602354 | 1.23469953792023  |
| Si | 4.87595976069330  | -6.25295894064728 | 1.14784671973707  |
| Si | 6.11742379673642  | -4.21816055041728 | 1.08250655494283  |
| Si | 8.48198475369539  | -4.19648885702950 | 0.89057340435717  |
| Si | 9.66825155752005  | -2.09511952505372 | 0.86258877915502  |
| Si | -2.40009887921800 | -6.01713000547648 | 1.24447605094262  |
| Si | 1.23924283631562  | -3.96634753496353 | 1.33518305363287  |
| Si | 5.04813871886198  | -2.13390062574280 | 1.22544421830885  |
| Si | 8.49481733007706  | -0.02956625366678 | 0.97686783183299  |
| Si | -4.78022401665861 | -6.27654856686607 | 1.16549091496487  |
| Si | -1.16579255649313 | -3.98186769771020 | 1.32991344751138  |
| Si | 2.71226592498314  | -2.10473271038685 | 1.35827859209419  |
| Si | 6.14515371408875  | -0.03807816288152 | 1.15921415902509  |
| Si | 9.65489100707463  | 2.04515708002895  | 0.90644393130333  |

|    |                   |                   |                   |
|----|-------------------|-------------------|-------------------|
| Si | 8.45443532398062  | 4.13756002625021  | 0.97828425647025  |
| Si | 5.03223574484848  | 2.04792897189936  | 1.27059923563732  |
| Si | 1.68092601296499  | -0.05666502108829 | 1.69273304561137  |
| Si | -2.63403437271799 | -2.12065959051367 | 1.31995825864782  |
| Si | -6.02368529960251 | -4.24143507482691 | 1.10245742176660  |
| Si | -4.96736774498136 | -2.14785243612090 | 1.21363218006316  |
| Si | -1.59898228825271 | -0.05654768254054 | 1.56910764365762  |
| Si | 2.69598239082056  | 2.00669553724809  | 1.40253864860210  |
| Si | 6.08972700992151  | 4.14073246133294  | 1.16977724235659  |
| Si | -8.39084116765623 | -4.23504754193731 | 0.94028660174934  |
| Si | -9.59103131489845 | -2.14198849046428 | 0.91266812226965  |
| Si | -6.08057536879596 | -0.06589425095574 | 1.15906107045321  |
| Si | -2.64797998128354 | 2.00401894946959  | 1.35972883436546  |
| Si | 1.21524248439289  | 3.86334149969293  | 1.41596057595148  |
| Si | 4.83993376753202  | 6.16872799238846  | 1.27538921828141  |
| Si | -8.43065069448356 | -0.07004073681773 | 1.00922908853791  |
| Si | -4.98139615533192 | 2.02192552707283  | 1.25403557443939  |
| Si | -1.18981768739826 | 3.87183320191117  | 1.40827536414737  |
| Si | 2.46179904495482  | 5.89483421675998  | 1.35600043054793  |
| Si | -9.60208597707478 | 1.99718511309722  | 0.95198204496342  |
| Si | -6.04688808838654 | 4.11248421082326  | 1.18174717352628  |
| Si | -2.43264053116188 | 5.90300037849875  | 1.36126600015802  |
| Si | 1.22452426093897  | 7.91937395774593  | 1.39397612130706  |
| Si | -8.41413436206706 | 4.09631386763809  | 1.01925505553555  |
| Si | -4.81391091350215 | 6.15217101591873  | 1.28510229725380  |
| Si | -1.19066218461261 | 7.92428554558399  | 1.39863267223679  |
| H  | 1.78621726162677  | -9.14843339289298 | 2.07571279716546  |
| H  | 1.84152684282085  | -9.11789404445401 | -2.01109022240624 |
| H  | -5.19695263468329 | -7.35623121554390 | -2.13377838243598 |
| H  | -8.86004290233658 | -5.20144774927454 | -2.35849070299551 |
| H  | -8.88850797387595 | 5.12217596632808  | -2.26057376564195 |
| H  | -5.23352813322658 | 7.29336286919643  | -1.99276227252964 |
| H  | -1.76664574102375 | 9.09581042445375  | -1.82476730116678 |
| H  | 1.79699702653347  | 9.07866762551326  | -1.83311786477056 |
| H  | 5.24395316164632  | 7.30184925889661  | -2.00861979473575 |
| H  | 8.88109283288238  | 5.16115043598337  | -2.30787397896144 |
| H  | 8.91471631428672  | -5.14873419885541 | -2.41622181950570 |
| H  | 5.28403024979307  | -7.31824603964567 | -2.15795236391743 |
| H  | 5.45067879048883  | -7.37159427098613 | 1.96256753294815  |
| H  | 9.25847192256473  | -5.24009786316113 | 1.63497039739390  |
| H  | 9.22442073450459  | 5.17003903033457  | 1.74466237461527  |
| H  | 5.41015547391068  | 7.27255025248839  | 2.11316580346009  |
| H  | 1.73933797893636  | 9.03523575322767  | 2.25353310907110  |
| H  | -1.69734568402444 | 9.03870695063791  | 2.26458305271897  |

|   |                    |                   |                   |
|---|--------------------|-------------------|-------------------|
| H | -5.39629859408888  | 7.24932032516042  | 2.12322646836823  |
| H | -9.17979956090403  | 5.12434109682723  | 1.79592496508001  |
| H | -9.15071443638606  | -5.28181914411413 | 1.69736104971568  |
| H | -5.35622503654541  | -7.39248983359727 | 1.98292808082706  |
| H | -1.72229905990049  | -9.14765274575469 | -2.00020338933638 |
| H | -1.64892496340302  | -9.16574979615719 | 2.08840406288433  |
| C | -0.57875630844953  | -0.07120979352444 | 3.21639858404995  |
| O | -1.17755993013032  | -0.07707065841992 | 4.27436749707728  |
| O | 0.76832956025097   | -0.07759585622911 | 3.17367124996558  |
| H | -3.65266564925578  | -0.08476735807770 | 4.09026644120483  |
| H | -4.38845354835121  | -0.08688492361766 | 3.89243350436921  |
| H | -10.87934735802597 | -2.24864325099321 | 1.67167540586514  |
| H | -10.65155896169399 | -2.18257951375114 | -2.38892440044535 |
| H | -10.89106508029133 | 2.08205661953693  | 1.71260594573535  |
| H | -10.66300882974437 | 2.09475516852986  | -2.34806961112242 |
| H | 10.96297248181784  | -2.20045152396999 | 1.61095433898163  |
| H | 10.70055795742366  | -2.11539788601526 | -2.44843183509579 |
| H | 10.68752561426713  | 2.14111716196428  | -2.40339211664188 |
| H | 10.94854918129278  | 2.14315670392027  | 1.65763050512872  |

• **2Si-CO<sub>2</sub> + H<sub>2</sub>\***

|    |                   |                   |                   |
|----|-------------------|-------------------|-------------------|
| Si | 1.13253402805152  | 8.03675722346917  | -1.23073136217528 |
| Si | -1.25950873462094 | 7.98427246419515  | -1.22790257461577 |
| Si | -2.38826871375551 | 5.90123653416434  | -1.22813305200190 |
| Si | -4.74642051188756 | 6.11301872874563  | -1.24768140599604 |
| Si | -5.73960064128356 | 3.96434038589089  | -1.25930250416787 |
| Si | -8.10676278261121 | 3.98957232290605  | -1.29141791249462 |
| Si | -9.24459627166852 | 1.89126267261175  | -1.32102184085196 |
| Si | 2.33125412714159  | 5.99507079898006  | -1.25503165293533 |
| Si | -1.16578052892932 | 3.87915769622935  | -1.21244901111106 |
| Si | -4.49987649927891 | 1.94621627558230  | -1.24610648295042 |
| Si | -7.94781455450280 | -0.08934734814635 | -1.32351128295327 |
| Si | 4.68913095025520  | 6.22522919131837  | -1.28433475682022 |
| Si | 1.18023387481553  | 3.93150511441058  | -1.24745146367398 |
| Si | -2.15559127634175 | 1.73556122177310  | -1.25043937438665 |
| Si | -5.59330815224730 | -0.12391969488354 | -1.30821239373799 |
| Si | -9.21017070447357 | -2.08108923838443 | -1.38041977065128 |
| Si | -7.90114005309042 | -4.07319045253560 | -1.41946780053554 |
| Si | -4.24271008652414 | -1.98713370238430 | -1.67352591772705 |
| Si | -1.01466961461522 | -0.19648894271225 | -1.82817942861605 |
| Si | 2.14520279881279  | 1.78429831411518  | -1.30963751701244 |
| Si | 5.66696404882403  | 4.06592646367295  | -1.32215384516615 |
| Si | 4.49798029642513  | 2.00547805894388  | -1.32661296689791 |

|    |                   |                   |                   |
|----|-------------------|-------------------|-------------------|
| Si | 1.15612506724574  | -0.03366726087740 | -2.38347529717706 |
| Si | -2.17678708080349 | -2.03508394124425 | -2.60956211361910 |
| Si | -5.53642390547276 | -3.91404292350192 | -1.44063636907436 |
| Si | 8.03855035927866  | 4.06310310676702  | -1.34919476977701 |
| Si | 9.24291506456236  | 1.99068415006094  | -1.39330692235905 |
| Si | 5.65870780471334  | -0.03483338751642 | -1.39281753408839 |
| Si | 2.18700229033969  | -1.86085798644058 | -1.35626677650623 |
| Si | -1.20069754670432 | -3.79649790253075 | -1.45683200773066 |
| Si | -4.56914936689442 | -6.07148903618481 | -1.43812498536196 |
| Si | 8.01157247015745  | -0.02786936190435 | -1.40811437824865 |
| Si | 4.53608352978931  | -2.10027325014449 | -1.37908088083562 |
| Si | 1.14432897960708  | -3.96967724747047 | -1.38051088404605 |
| Si | -2.21574343044693 | -5.91808589169565 | -1.45296004799317 |
| Si | 9.27142112460897  | -2.02891695990523 | -1.45145809433114 |
| Si | 5.73034104254532  | -4.14116283357940 | -1.43898757044873 |
| Si | 2.33049818489830  | -6.02045011375350 | -1.42948785077843 |
| Si | -1.17537939079011 | -8.03990755510840 | -1.44905040895613 |
| Si | 8.10177708944684  | -4.12265930795021 | -1.46632489457188 |
| Si | 4.68951354958156  | -6.26828863200852 | -1.45560190753033 |
| Si | 1.21003878912507  | -8.10371499232763 | -1.45835729085856 |
| Si | 1.13929716695430  | 8.01304794624082  | 1.17455159904753  |
| Si | -1.25706023580719 | 7.97553826275917  | 1.18083555817295  |
| Si | -2.39241716692346 | 5.89830289377389  | 1.17601591158792  |
| Si | -4.75572566299705 | 6.09764584285271  | 1.17990213464598  |
| Si | -5.76483693458518 | 3.95571238766743  | 1.14255710410085  |
| Si | -8.13091036379033 | 3.96972578068968  | 1.11516901603892  |
| Si | -9.26701591562749 | 1.86553164243061  | 1.08432996217385  |
| Si | 2.34910618451354  | 5.97446654601905  | 1.14989148445475  |
| Si | -1.16897628878878 | 3.87673034804114  | 1.18141018218462  |
| Si | -4.52987797546332 | 1.94273364227118  | 1.13999533026792  |
| Si | -7.97736689548455 | -0.11994946555931 | 1.07689459168706  |
| Si | 4.71023241548181  | 6.19876297668713  | 1.13655682278482  |
| Si | 1.18480391377883  | 3.91251088093418  | 1.15018404379256  |
| Si | -2.19035686571115 | 1.74825075872327  | 1.17187317245265  |
| Si | -5.62083651077141 | -0.13391198527426 | 1.12550566582271  |
| Si | -9.22124434862959 | -2.12632752212431 | 1.02506070293340  |
| Si | -7.89706421536807 | -4.11003252030612 | 0.97717730844174  |
| Si | -4.28793368072896 | -2.01577936379934 | 1.41585198112989  |
| Si | -1.11597980321025 | -0.06567194101547 | 2.16720095207479  |
| Si | 2.19129701745992  | 1.78669833941252  | 1.11010199352538  |
| Si | 5.69525059580793  | 4.04154048136224  | 1.07892215460208  |
| Si | 4.53908865777126  | 1.97867066651098  | 1.07689404535313  |
| Si | 1.21382181885201  | -0.10267250269186 | 2.03982938057016  |
| Si | -2.21810536816829 | -2.12538962736803 | 2.26597159206715  |

|    |                   |                   |                   |
|----|-------------------|-------------------|-------------------|
| Si | -5.53583392459352 | -3.93324870707341 | 0.96795874435180  |
| Si | 8.06770798909513  | 4.03411375979990  | 1.05241279716961  |
| Si | 9.26950172207019  | 1.95883532431227  | 1.01344015472590  |
| Si | 5.68918788290906  | -0.06589793119888 | 1.02053171155165  |
| Si | 2.24827754865294  | -1.93866755513100 | 1.07491254939466  |
| Si | -1.19541983808233 | -3.79061051730424 | 1.03457209956155  |
| Si | -4.55671726066408 | -6.08215386354985 | 0.96612015057409  |
| Si | 8.04119795841303  | -0.06137854877276 | 0.99892366719136  |
| Si | 4.58376769576609  | -2.13709011967020 | 1.02886119819082  |
| Si | 1.14855629137396  | -4.00916672035117 | 1.01241951738355  |
| Si | -2.20380735800030 | -5.91898978557641 | 0.95056630434796  |
| Si | 9.30020031905627  | -2.06357347995971 | 0.95483436763105  |
| Si | 5.76354109731479  | -4.17928783643290 | 0.96327684565300  |
| Si | 2.34366381647246  | -6.05679927034136 | 0.96841881248730  |
| Si | -1.16449858956040 | -8.04509264191756 | 0.95491088247921  |
| Si | 8.13459529458467  | -4.15970670601706 | 0.93476978032117  |
| Si | 4.70554868545851  | -6.29691762896029 | 0.96406132931471  |
| Si | 1.22084994912729  | -8.13677660670794 | 0.94573029766471  |
| H  | -1.83489143536588 | 9.07062143558431  | 2.02521260545343  |
| H  | -1.86004699037734 | 9.07349497657214  | -2.06396700982183 |
| H  | 5.27943309144420  | 7.29287573329652  | -2.15409167272194 |
| H  | 8.70334638595321  | 5.11349984045323  | -2.18667082755377 |
| H  | 8.78070107543000  | -5.13845605048680 | -2.33425732551860 |
| H  | 5.25688463901461  | -7.33491897524613 | -2.34204867380465 |
| H  | 1.77887059592035  | -9.17870450979697 | -2.33373126345999 |
| H  | -1.81387474153140 | -9.09235538514000 | -2.30335920670576 |
| H  | -5.22504660735180 | -7.06285739011377 | -2.34947420300512 |
| H  | -8.46969196999759 | -5.15806027137008 | -2.28173351153951 |
| H  | -8.77745704631818 | 5.02683597105088  | -2.13932217521643 |
| H  | -5.35301238935001 | 7.16490026671539  | -2.12569570092276 |
| H  | -5.37389225026437 | 7.13695744053429  | 2.06471623139375  |
| H  | -8.83380898096971 | 4.98541953975417  | 1.96308078671447  |
| H  | -8.44829740276658 | -5.22682043081328 | 1.80951092590543  |
| H  | -5.20132188048531 | -7.07418964967999 | 1.88470437255374  |
| H  | -1.80746200833927 | -9.09273605622485 | 1.81192196727367  |
| H  | 1.77861806349760  | -9.24445242702390 | 1.78668913042490  |
| H  | 5.28375400408087  | -7.37959175668879 | 1.82344716065070  |
| H  | 8.83473096997228  | -5.20140731789549 | 1.75365568226534  |
| H  | 8.75694014406313  | 5.06140324321039  | 1.89860735739038  |
| H  | 5.33286834090437  | 7.23342994974397  | 2.02343555430489  |
| H  | 1.67667843414676  | 9.15686169283762  | -2.06433082662248 |
| H  | 1.68368840937845  | 9.11968256330188  | 2.02594304882411  |
| C  | 0.70323113243676  | 0.16613608507185  | 3.94450770048386  |
| O  | 1.31359609787879  | 0.25118588228692  | 4.97663603927650  |

|   |                    |                   |                   |
|---|--------------------|-------------------|-------------------|
| O | -0.66709929739143  | 0.31451001033444  | 3.85537590139315  |
| H | -10.41829421910604 | -2.12030074143065 | -2.26512013989998 |
| H | -10.43519055031782 | -2.23310390114484 | 1.89620603227732  |
| H | -10.50754581022220 | 1.86023455340565  | 1.92464932721023  |
| H | -10.46872329985129 | 1.88934581437090  | -2.18516013714777 |
| H | 10.54171063794215  | -2.11576323878832 | 1.79290329594411  |
| H | 10.50883089985239  | 2.00819687826548  | 1.85494828291202  |
| H | 10.49404721461664  | -2.05807364114018 | -2.31823188614513 |
| H | 10.46409402534331  | 2.06486717579800  | -2.25937418559485 |
| H | -3.92766191909337  | 0.73405913884921  | 4.15644683767378  |
| H | -3.21569280401742  | 0.66270915751592  | 4.41303890721909  |

- **2Si-COOH**

|    |             |             |             |
|----|-------------|-------------|-------------|
| Si | -1.20335400 | -7.95441000 | -0.97794800 |
| Si | 1.18319600  | -8.08207300 | -1.02316900 |
| Si | 2.42492500  | -6.06408200 | -1.08509400 |
| Si | 4.78275800  | -6.28425300 | -1.26372500 |
| Si | 5.90413300  | -4.18092500 | -1.33665100 |
| Si | 8.27405500  | -4.10426200 | -1.56959400 |
| Si | 9.42257400  | -1.99200900 | -1.59439000 |
| Si | -2.32080500 | -5.86428900 | -0.98262600 |
| Si | 1.23353700  | -4.03795200 | -1.00443400 |
| Si | 4.78486700  | -2.08910500 | -1.18989100 |
| Si | 8.20937700  | 0.03483000  | -1.42522300 |
| Si | -4.67814400 | -6.08501900 | -1.05232800 |
| Si | -1.09874900 | -3.85202200 | -0.96565300 |
| Si | 2.41892900  | -2.02696000 | -1.01022100 |
| Si | 5.87508400  | -0.00880300 | -1.21947300 |
| Si | 9.35792700  | 2.10464500  | -1.48429300 |
| Si | 8.06164900  | 4.11749700  | -1.37319200 |
| Si | 4.59635000  | 1.94514500  | -1.04655600 |
| Si | 0.98731200  | -0.14670800 | -0.67331900 |
| Si | -2.33830600 | -1.86666500 | -0.94403000 |
| Si | -5.79216000 | -3.99587000 | -1.13312700 |
| Si | -4.67047500 | -1.91833900 | -1.07847000 |
| Si | -1.31919900 | 0.27556300  | -0.85185300 |
| Si | 2.25116600  | 1.84987700  | -0.82913900 |
| Si | 5.70127600  | 4.02771800  | -1.14860100 |
| Si | -8.14963100 | -4.03259600 | -1.34755400 |
| Si | -9.32539700 | -1.95102300 | -1.48485800 |
| Si | -5.78199000 | 0.13762000  | -1.18524800 |
| Si | -2.25334900 | 1.89651800  | -2.30591400 |
| Si | 0.94445300  | 3.79855200  | -0.86942500 |

|    |             |             |             |
|----|-------------|-------------|-------------|
| Si | 4.53081000  | 6.08337400  | -1.07466100 |
| Si | -8.12217900 | 0.09137800  | -1.42784000 |
| Si | -4.32057300 | 2.01180500  | -1.13827800 |
| Si | -1.40753700 | 3.63680300  | -0.96557900 |
| Si | 2.18214100  | 5.80549800  | -0.98254400 |
| Si | -9.37407300 | 2.08371500  | -1.61940700 |
| Si | -5.69561300 | 3.95828900  | -1.29731500 |
| Si | -2.32810600 | 5.81506100  | -1.08260400 |
| Si | 1.15236900  | 7.92994400  | -1.04133900 |
| Si | -8.05241300 | 4.07728700  | -1.59171700 |
| Si | -4.66757400 | 6.09616800  | -1.26101800 |
| Si | -1.22417800 | 7.91312300  | -1.09472800 |
| Si | -1.17735800 | -7.90066700 | 1.42524200  |
| Si | 1.23813300  | -8.02672800 | 1.37870800  |
| Si | 2.56418700  | -6.06150900 | 1.31612900  |
| Si | 4.94147100  | -6.31801800 | 1.15318300  |
| Si | 6.14417900  | -4.26362700 | 1.05242500  |
| Si | 8.50278800  | -4.18783400 | 0.81859000  |
| Si | 9.63323000  | -2.05682000 | 0.80031600  |
| Si | -2.36520300 | -5.84004900 | 1.41345200  |
| Si | 1.31368500  | -4.03559800 | 1.40464900  |
| Si | 5.07469000  | -2.18549800 | 1.19426400  |
| Si | 8.41484100  | -0.02007100 | 0.97009700  |
| Si | -4.75526900 | -6.04950100 | 1.36942600  |
| Si | -1.07861000 | -3.83179500 | 1.46273400  |
| Si | 2.75826800  | -2.17250200 | 1.35224000  |
| Si | 6.06906600  | -0.04930300 | 1.18830000  |
| Si | 9.52791000  | 2.07574300  | 0.91311000  |
| Si | 8.25960700  | 4.12841700  | 1.02188500  |
| Si | 4.83447500  | 1.97324900  | 1.35317600  |
| Si | 1.64961200  | -0.17724200 | 1.62757300  |
| Si | -2.54676700 | -1.95329600 | 1.43630100  |
| Si | -5.98022700 | -4.00692000 | 1.25960200  |
| Si | -4.88943300 | -1.92300800 | 1.32994100  |
| Si | -1.71113600 | 0.26688400  | 1.55010300  |
| Si | 2.48014700  | 1.98744500  | 1.54919000  |
| Si | 5.89763500  | 4.06614900  | 1.24436400  |
| Si | -8.34292400 | -4.00367900 | 1.04787700  |
| Si | -9.52005200 | -1.90217300 | 0.91112900  |
| Si | -6.01537400 | 0.14614200  | 1.20876400  |
| Si | -2.77582600 | 2.14094800  | 2.45766300  |
| Si | 0.98059700  | 3.83904700  | 1.52564900  |
| Si | 4.63021500  | 6.08539800  | 1.34554200  |
| Si | -8.35824100 | 0.16466200  | 0.96480200  |

|    |              |             |             |
|----|--------------|-------------|-------------|
| Si | -4.74338000  | 2.12227300  | 1.25967600  |
| Si | -1.41800700  | 3.78414800  | 1.49623300  |
| Si | 2.24524800   | 5.86293100  | 1.41775900  |
| Si | -9.60048800  | 2.17547000  | 0.77141900  |
| Si | -5.98037400  | 4.09365400  | 1.07983800  |
| Si | -2.46211700  | 5.90183700  | 1.30495500  |
| Si | 1.12971100   | 7.95368500  | 1.36372200  |
| Si | -8.32559000  | 4.20559000  | 0.79363600  |
| Si | -4.82700400  | 6.16228100  | 1.14938400  |
| Si | -1.27425700  | 7.94629700  | 1.30893800  |
| H  | 1.70426800   | -9.16821700 | 2.23226100  |
| H  | 1.70435300   | -9.21527200 | -1.85381200 |
| H  | -5.21063700  | -7.18617300 | -1.91740800 |
| H  | -8.73473300  | -5.09300400 | -2.23013400 |
| H  | -8.55747100  | 5.11455200  | -2.54907500 |
| H  | -5.16867600  | 7.15822800  | -2.19303500 |
| H  | -1.83451100  | 8.96499000  | -1.97017200 |
| H  | 1.81251000   | 8.96478100  | -1.90058400 |
| H  | 5.02208100   | 7.19371700  | -1.95248600 |
| H  | 8.60272600   | 5.19378300  | -2.26474800 |
| H  | 8.90814000   | -5.08629100 | -2.50760700 |
| H  | 5.28008600   | -7.38323900 | -2.15205300 |
| H  | 5.55981100   | -7.43186000 | 1.94210200  |
| H  | 9.30696500   | -5.22671400 | 1.53931800  |
| H  | 9.01776800   | 5.16792200  | 1.79140000  |
| H  | 5.21218700   | 7.18208700  | 2.18573000  |
| H  | 1.65048300   | 9.07563800  | 2.21200100  |
| H  | -1.83396600  | 9.06669800  | 2.13397000  |
| H  | -5.44213400  | 7.24702800  | 1.98366400  |
| H  | -9.03657700  | 5.31749200  | 1.50490200  |
| H  | -9.12890200  | -5.00294600 | 1.84240000  |
| H  | -5.32951800  | -7.12825500 | 2.23765900  |
| H  | -1.86016700  | -9.03316900 | -1.78497200 |
| H  | -1.71067900  | -9.00482200 | 2.28927100  |
| C  | -0.59132200  | -0.08831800 | 3.09091500  |
| O  | -1.14656300  | -0.12429000 | 4.29369800  |
| O  | 0.64359400   | -0.42073600 | 3.11011000  |
| H  | -2.06980800  | 0.21428500  | 4.21834700  |
| H  | -2.85502100  | 2.05204800  | 3.96138000  |
| H  | -10.49565700 | -2.01818700 | -2.41960200 |
| H  | -10.82135600 | -1.97991000 | 1.65294000  |
| H  | -10.89805100 | 2.28699700  | 1.51416700  |
| H  | -10.52032500 | 2.12007800  | -2.58414900 |
| H  | 10.81802600  | 2.20201400  | 1.66665300  |



H 10.94718500 -2.14253700 1.51792400  
H 10.59579600 -2.00934600 -2.52759300  
H 10.52869800 2.22159400 -2.41273200

• **2Si-CO-OH**

Si 1.14573946982623 8.04838558052563 -1.32727257023344  
Si -1.24538826897019 8.00820582844402 -1.33913245175978  
Si -2.36714613738341 5.92385266608734 -1.33436828739229  
Si -4.72303795726032 6.12654317289078 -1.36682350400660  
Si -5.67614801167428 3.96411950227038 -1.35020262845500  
Si -8.04491337776342 3.99479452047193 -1.39113125757397  
Si -9.23477833059404 1.92131174099476 -1.40343934657691  
Si 2.33764085777925 6.00129860359048 -1.30216701009666  
Si -1.15993945258624 3.88743919923825 -1.29830984071770  
Si -4.45437134563995 1.93753879942104 -1.31387594436360  
Si -7.98312847075359 -0.08408451596291 -1.37265482212061  
Si 4.69315067847365 6.24131236333140 -1.31318998766927  
Si 1.18651585806960 3.93324837629988 -1.29180815857865  
Si -2.09770298733202 1.71755446365242 -1.34263127380468  
Si -5.62866674471347 -0.08715372937226 -1.31358141824183  
Si -9.26118276272251 -2.06709869424337 -1.40326139266285  
Si -7.92705420643490 -4.04682714326330 -1.39469762605271  
Si -4.17919965162322 -1.94914243657794 -1.31133063052003  
Si -0.97181955402940 -0.22101273719814 -1.95783511892135  
Si 2.07234898957630 1.74412111521554 -1.36476791003754  
Si 5.64381011282118 4.07225488954534 -1.31553270335797  
Si 4.42624689154531 2.03461550348079 -1.29545145686716  
Si 1.19370038360208 0.02531000793427 -2.70102383959205  
Si -2.25686699997233 -1.98237994264961 -2.64975906489993  
Si -5.56256996757897 -3.87690821612944 -1.32615351134775  
Si 8.01538646412516 4.06833979675158 -1.33278341619661  
Si 9.21805652964487 1.99609867535498 -1.34296834790840  
Si 5.60985171899188 0.00535434396380 -1.36288218157218  
Si 2.11211073884063 -1.74726563672022 -1.45939443399986  
Si -1.24657648442156 -3.69692673722726 -1.41324603482565  
Si -4.60513387076077 -6.03701644245453 -1.37688634217046  
Si 7.96485616363117 -0.00586932023566 -1.35045554417422  
Si 4.46018221130350 -2.04167578944530 -1.34817292341079  
Si 1.10767006440380 -3.88209392834951 -1.37085831858878  
Si -2.24983455825021 -5.84670165682452 -1.37353183437541  
Si 9.22711092474961 -2.00393006054761 -1.36488731395660  
Si 5.67253946160847 -4.07236665143340 -1.37205669175736  
Si 2.28208199680448 -5.94591830453693 -1.39239095467224

|    |                   |                   |                   |
|----|-------------------|-------------------|-------------------|
| Si | -1.21330008092796 | -7.96873485812823 | -1.39515383272421 |
| Si | 8.04203391074909  | -4.08651119368175 | -1.36939243833708 |
| Si | 4.63907601095128  | -6.20017865482689 | -1.40236635744430 |
| Si | 1.17066607948488  | -8.03703691014720 | -1.40493751290909 |
| Si | 1.13685185381537  | 8.07239189984028  | 1.07687007939213  |
| Si | -1.25741420770347 | 8.02305492076421  | 1.06807847445310  |
| Si | -2.39303920956005 | 5.94625936609984  | 1.07128729312062  |
| Si | -4.75158419857574 | 6.14888411629357  | 1.05897780955772  |
| Si | -5.71820824507159 | 3.99124256742751  | 1.05478442863430  |
| Si | -8.08569799496212 | 4.00539607303152  | 1.01423825722075  |
| Si | -9.27970182237411 | 1.92930481558872  | 1.00142673429129  |
| Si | 2.34086903296284  | 6.03474720789872  | 1.10324705461520  |
| Si | -1.19172239791549 | 3.90806543411595  | 1.09334132191386  |
| Si | -4.50287492868892 | 1.96243754999275  | 1.07524664143279  |
| Si | -8.03797291992812 | -0.08367798174888 | 1.03559158833857  |
| Si | 4.69877273091729  | 6.25384038775253  | 1.10460318973323  |
| Si | 1.15362209881751  | 3.98947181047494  | 1.10781398381242  |
| Si | -2.14795597643870 | 1.75060194391910  | 1.08043842360342  |
| Si | -5.68101546296528 | -0.06938261957869 | 1.07867885949504  |
| Si | -9.30174931564799 | -2.07853404816136 | 1.00198231325481  |
| Si | -7.98778612196457 | -4.07579796588893 | 1.00691956518324  |
| Si | -4.30805846931296 | -1.98067769141026 | 1.12977560005063  |
| Si | -1.24326426272221 | 0.06339355386924  | 2.44162961507566  |
| Si | 2.15446369037924  | 1.87477259454072  | 1.07008808643038  |
| Si | 5.66606298613303  | 4.09173550538890  | 1.08461360649254  |
| Si | 4.49201714278510  | 2.03587336523264  | 1.11397793659678  |
| Si | 1.09142384362254  | -0.02202627636977 | 1.98316833057036  |
| Si | -2.27556851453395 | -2.06421317926461 | 2.28468801484027  |
| Si | -5.62573128666086 | -3.93577832399760 | 1.06996829838924  |
| Si | 8.03564797069380  | 4.07406701326560  | 1.06847876039536  |
| Si | 9.22188409672336  | 1.99125329045043  | 1.06442824097155  |
| Si | 5.62388583287340  | -0.01317046327910 | 1.05034062472244  |
| Si | 2.15179417674549  | -1.87165061005552 | 0.97081697666323  |
| Si | -1.23115891927769 | -3.74282004185744 | 1.02637227848574  |
| Si | -4.61899306357488 | -6.07042734483555 | 1.03736318237827  |
| Si | 7.97760033630934  | -0.01729169904361 | 1.05647367626928  |
| Si | 4.48875843974994  | -2.06107186546792 | 1.06268937367724  |
| Si | 1.10230711224347  | -3.94927658858757 | 1.03438223906152  |
| Si | -2.26356835931906 | -5.86634832430493 | 1.02507711646591  |
| Si | 9.23631298648768  | -2.01640509690652 | 1.04197881059560  |
| Si | 5.67950373635955  | -4.10508788334561 | 1.02958917055431  |
| Si | 2.29777658134711  | -5.98689453939011 | 1.00526046236955  |
| Si | -1.20635358322704 | -7.98324055827854 | 1.01104860766075  |
| Si | 8.04916981363675  | -4.09825775461441 | 1.03215072719992  |

|    |                    |                   |                   |
|----|--------------------|-------------------|-------------------|
| Si | 4.65249168556076   | -6.23378744112179 | 1.01508132726913  |
| Si | 1.17699444019573   | -8.06489150869574 | 0.99868617743705  |
| H  | -1.84435648999419  | 9.12000933930354  | 1.90415388918921  |
| H  | -1.83240952565885  | 9.09233586318127  | -2.19126058710219 |
| H  | 5.29826815121976   | 7.28851340226359  | -2.19707491597782 |
| H  | 8.67922351917546   | 5.11100400513630  | -2.18025727459321 |
| H  | 8.71675046534890   | -5.12132141905893 | -2.21757056039075 |
| H  | 5.22245852071713   | -7.25440860131880 | -2.29282310732675 |
| H  | 1.75402122268837   | -9.11313848911792 | -2.26963530518326 |
| H  | -1.84429142619091  | -9.02563449699951 | -2.25002435400933 |
| H  | -5.23133019157682  | -7.05292860792821 | -2.28489130128348 |
| H  | -8.48418254587599  | -5.13438375635569 | -2.26305532442707 |
| H  | -8.69437056136575  | 5.03980657693145  | -2.24710378898446 |
| H  | -5.32900517619291  | 7.16129473594167  | -2.26563276580643 |
| H  | -5.36776169337333  | 7.19979923852262  | 1.93209789827356  |
| H  | -8.77459269624666  | 5.04942223835213  | 1.84044069713381  |
| H  | -8.60388904689976  | -5.16884734016688 | 1.82781693545487  |
| H  | -5.19479143772828  | -7.12562175138657 | 1.93442558997764  |
| H  | -1.83157007131455  | -9.04507688793231 | 1.86478108146554  |
| H  | 1.75679240944079   | -9.15591092000124 | 1.84686002407039  |
| H  | 5.22466126221116   | -7.30625243216700 | 1.89111566610500  |
| H  | 8.72620508770653   | -5.13688269580725 | 1.87408149648714  |
| H  | 8.72490816344655   | 5.10787512756533  | 1.90672410306169  |
| H  | 5.31737343437502   | 7.29126525362789  | 1.99114413754642  |
| H  | 1.71245214428756   | 9.14400307063124  | -2.17824961233960 |
| H  | 1.67744049928213   | 9.19247807638236  | 1.91311957774851  |
| C  | 1.76575335924826   | -0.07258054282144 | 3.70072342757682  |
| O  | 2.26542492707522   | -0.10113073809869 | 4.74225931028459  |
| O  | -1.22583347261255  | 0.56617234949506  | 4.07013725450090  |
| H  | -10.46678065906227 | -2.13254990319954 | -2.29065198967155 |
| H  | -10.53269751056094 | -2.16366755892741 | 1.85287068237663  |
| H  | -10.52600310544964 | 1.98929417533656  | 1.83200889663252  |
| H  | -10.45212788630459 | 1.95799102656772  | -2.27656742878549 |
| H  | 10.46661799154453  | -2.06546980221289 | 1.89667416012151  |
| H  | 10.44971117344081  | 2.03500355485044  | 1.92304822470522  |
| H  | 10.45463816024223  | -2.03889272134926 | -2.22401838567457 |
| H  | 10.44636791839303  | 2.05227290595054  | -2.19993786659787 |
| H  | -2.42789920029106  | -2.49330894253518 | 3.71481318291886  |
| H  | -2.08368633666843  | 0.48172146809368  | 4.52516830872141  |

- **2Si-CO-H<sub>2</sub>O**

|    |                   |                  |                   |
|----|-------------------|------------------|-------------------|
| Si | 1.14573946982623  | 8.04838558052563 | -1.32727257023344 |
| Si | -1.24538826897019 | 8.00820582844402 | -1.33913245175978 |

|    |                   |                   |                   |
|----|-------------------|-------------------|-------------------|
| Si | -2.36714613738341 | 5.92385266608734  | -1.33436828739229 |
| Si | -4.72303795726032 | 6.12654317289078  | -1.36682350400660 |
| Si | -5.67614801167428 | 3.96411950227038  | -1.35020262845500 |
| Si | -8.04491337776342 | 3.99479452047193  | -1.39113125757397 |
| Si | -9.23477833059404 | 1.92131174099476  | -1.40343934657691 |
| Si | 2.33764085777925  | 6.00129860359048  | -1.30216701009666 |
| Si | -1.15993945258624 | 3.88743919923825  | -1.29830984071770 |
| Si | -4.45437134563995 | 1.93753879942104  | -1.31387594436360 |
| Si | -7.98312847075359 | -0.08408451596291 | -1.37265482212061 |
| Si | 4.69315067847365  | 6.24131236333140  | -1.31318998766927 |
| Si | 1.18651585806960  | 3.93324837629988  | -1.29180815857865 |
| Si | -2.09770298733202 | 1.71755446365242  | -1.34263127380468 |
| Si | -5.62866674471347 | -0.08715372937226 | -1.31358141824183 |
| Si | -9.26118276272251 | -2.06709869424337 | -1.40326139266285 |
| Si | -7.92705420643490 | -4.04682714326330 | -1.39469762605271 |
| Si | -4.17919965162322 | -1.94914243657794 | -1.31133063052003 |
| Si | -0.97181955402940 | -0.22101273719814 | -1.95783511892135 |
| Si | 2.07234898957630  | 1.74412111521554  | -1.36476791003754 |
| Si | 5.64381011282118  | 4.07225488954534  | -1.31553270335797 |
| Si | 4.42624689154531  | 2.03461550348079  | -1.29545145686716 |
| Si | 1.19370038360208  | 0.02531000793427  | -2.70102383959205 |
| Si | -2.25686699997233 | -1.98237994264961 | -2.64975906489993 |
| Si | -5.56256996757897 | -3.87690821612944 | -1.32615351134775 |
| Si | 8.01538646412516  | 4.06833979675158  | -1.33278341619661 |
| Si | 9.21805652964487  | 1.99609867535498  | -1.34296834790840 |
| Si | 5.60985171899188  | 0.00535434396380  | -1.36288218157218 |
| Si | 2.11211073884063  | -1.74726563672022 | -1.45939443399986 |
| Si | -1.24657648442156 | -3.69692673722726 | -1.41324603482565 |
| Si | -4.60513387076077 | -6.03701644245453 | -1.37688634217046 |
| Si | 7.96485616363117  | -0.00586932023566 | -1.35045554417422 |
| Si | 4.46018221130350  | -2.04167578944530 | -1.34817292341079 |
| Si | 1.10767006440380  | -3.88209392834951 | -1.37085831858878 |
| Si | -2.24983455825021 | -5.84670165682452 | -1.37353183437541 |
| Si | 9.22711092474961  | -2.00393006054761 | -1.36488731395660 |
| Si | 5.67253946160847  | -4.07236665143340 | -1.37205669175736 |
| Si | 2.28208199680448  | -5.94591830453693 | -1.39239095467224 |
| Si | -1.21330008092796 | -7.96873485812823 | -1.39515383272421 |
| Si | 8.04203391074909  | -4.08651119368175 | -1.36939243833708 |
| Si | 4.63907601095128  | -6.20017865482689 | -1.40236635744430 |
| Si | 1.17066607948488  | -8.03703691014720 | -1.40493751290909 |
| Si | 1.13685185381537  | 8.07239189984028  | 1.07687007939213  |
| Si | -1.25741420770347 | 8.02305492076421  | 1.06807847445310  |
| Si | -2.39303920956005 | 5.94625936609984  | 1.07128729312062  |
| Si | -4.75158419857574 | 6.14888411629357  | 1.05897780955772  |

|    |                   |                   |                   |
|----|-------------------|-------------------|-------------------|
| Si | -5.71820824507159 | 3.99124256742751  | 1.05478442863430  |
| Si | -8.08569799496212 | 4.00539607303152  | 1.01423825722075  |
| Si | -9.27970182237411 | 1.92930481558872  | 1.00142673429129  |
| Si | 2.34086903296284  | 6.03474720789872  | 1.10324705461520  |
| Si | -1.19172239791549 | 3.90806543411595  | 1.09334132191386  |
| Si | -4.50287492868892 | 1.96243754999275  | 1.07524664143279  |
| Si | -8.03797291992812 | -0.08367798174888 | 1.03559158833857  |
| Si | 4.69877273091729  | 6.25384038775253  | 1.10460318973323  |
| Si | 1.15362209881751  | 3.98947181047494  | 1.10781398381242  |
| Si | -2.14795597643870 | 1.75060194391910  | 1.08043842360342  |
| Si | -5.68101546296528 | -0.06938261957869 | 1.07867885949504  |
| Si | -9.30174931564799 | -2.07853404816136 | 1.00198231325481  |
| Si | -7.98778612196457 | -4.07579796588893 | 1.00691956518324  |
| Si | -4.30805846931296 | -1.98067769141026 | 1.12977560005063  |
| Si | -1.24326426272221 | 0.06339355386924  | 2.44162961507566  |
| Si | 2.15446369037924  | 1.87477259454072  | 1.07008808643038  |
| Si | 5.66606298613303  | 4.09173550538890  | 1.08461360649254  |
| Si | 4.49201714278510  | 2.03587336523264  | 1.11397793659678  |
| Si | 1.09142384362254  | -0.02202627636977 | 1.98316833057036  |
| Si | -2.27556851453395 | -2.06421317926461 | 2.28468801484027  |
| Si | -5.62573128666086 | -3.93577832399760 | 1.06996829838924  |
| Si | 8.03564797069380  | 4.07406701326560  | 1.06847876039536  |
| Si | 9.22188409672336  | 1.99125329045043  | 1.06442824097155  |
| Si | 5.62388583287340  | -0.01317046327910 | 1.05034062472244  |
| Si | 2.15179417674549  | -1.87165061005552 | 0.97081697666323  |
| Si | -1.23115891927769 | -3.74282004185744 | 1.02637227848574  |
| Si | -4.61899306357488 | -6.07042734483555 | 1.03736318237827  |
| Si | 7.97760033630934  | -0.01729169904361 | 1.05647367626928  |
| Si | 4.48875843974994  | -2.06107186546792 | 1.06268937367724  |
| Si | 1.10230711224347  | -3.94927658858757 | 1.03438223906152  |
| Si | -2.26356835931906 | -5.86634832430493 | 1.02507711646591  |
| Si | 9.23631298648768  | -2.01640509690652 | 1.04197881059560  |
| Si | 5.67950373635955  | -4.10508788334561 | 1.02958917055431  |
| Si | 2.29777658134711  | -5.98689453939011 | 1.00526046236955  |
| Si | -1.20635358322704 | -7.98324055827854 | 1.01104860766075  |
| Si | 8.04916981363675  | -4.09825775461441 | 1.03215072719992  |
| Si | 4.65249168556076  | -6.23378744112179 | 1.01508132726913  |
| Si | 1.17699444019573  | -8.06489150869574 | 0.99868617743705  |
| H  | -1.84435648999419 | 9.12000933930354  | 1.90415388918921  |
| H  | -1.83240952565885 | 9.09233586318127  | -2.19126058710219 |
| H  | 5.29826815121976  | 7.28851340226359  | -2.19707491597782 |
| H  | 8.67922351917546  | 5.11100400513630  | -2.18025727459321 |
| H  | 8.71675046534890  | -5.12132141905893 | -2.21757056039075 |
| H  | 5.22245852071713  | -7.25440860131880 | -2.29282310732675 |

|   |                    |                   |                   |
|---|--------------------|-------------------|-------------------|
| H | 1.75402122268837   | -9.11313848911792 | -2.26963530518326 |
| H | -1.84429142619091  | -9.02563449699951 | -2.25002435400933 |
| H | -5.23133019157682  | -7.05292860792821 | -2.28489130128348 |
| H | -8.48418254587599  | -5.13438375635569 | -2.26305532442707 |
| H | -8.69437056136575  | 5.03980657693145  | -2.24710378898446 |
| H | -5.32900517619291  | 7.16129473594167  | -2.26563276580643 |
| H | -5.36776169337333  | 7.19979923852262  | 1.93209789827356  |
| H | -8.77459269624666  | 5.04942223835213  | 1.84044069713381  |
| H | -8.60388904689976  | -5.16884734016688 | 1.82781693545487  |
| H | -5.19479143772828  | -7.12562175138657 | 1.93442558997764  |
| H | -1.83157007131455  | -9.04507688793231 | 1.86478108146554  |
| H | 1.75679240944079   | -9.15591092000124 | 1.84686002407039  |
| H | 5.22466126221116   | -7.30625243216700 | 1.89111566610500  |
| H | 8.72620508770653   | -5.13688269580725 | 1.87408149648714  |
| H | 8.72490816344655   | 5.10787512756533  | 1.90672410306169  |
| H | 5.31737343437502   | 7.29126525362789  | 1.99114413754642  |
| H | 1.71245214428756   | 9.14400307063124  | -2.17824961233960 |
| H | 1.67744049928213   | 9.19247807638236  | 1.91311957774851  |
| C | 1.76575335924826   | -0.07258054282144 | 3.70072342757682  |
| O | 2.26542492707522   | -0.10113073809869 | 4.74225931028459  |
| O | -1.22583347261255  | 0.56617234949506  | 4.07013725450090  |
| H | -10.46678065906227 | -2.13254990319954 | -2.29065198967155 |
| H | -10.53269751056094 | -2.16366755892741 | 1.85287068237663  |
| H | -10.52600310544964 | 1.98929417533656  | 1.83200889663252  |
| H | -10.45212788630459 | 1.95799102656772  | -2.27656742878549 |
| H | 10.46661799154453  | -2.06546980221289 | 1.89667416012151  |
| H | 10.44971117344081  | 2.03500355485044  | 1.92304822470522  |
| H | 10.45463816024223  | -2.03889272134926 | -2.22401838567457 |
| H | 10.44636791839303  | 2.05227290595054  | -2.19993786659787 |
| H | -2.42789920029106  | -2.49330894253518 | 3.71481318291886  |
| H | -2.08368633666843  | 0.48172146809368  | 4.52516830872141  |

• **2Si-HCOOH**

|    |                   |                   |                   |
|----|-------------------|-------------------|-------------------|
| Si | -1.18202400633036 | -8.03952148979941 | -1.07993295352590 |
| Si | 1.20770268932462  | -7.97159967826550 | -1.05141626187628 |
| Si | 2.35221221684135  | -5.89708974255549 | -1.02673532883939 |
| Si | 4.70700959386633  | -6.16108102463070 | -1.09736446592287 |
| Si | 5.82253461964034  | -4.06783052012340 | -1.16022596343555 |
| Si | 8.19143353743500  | -4.09610355277387 | -1.34076266104330 |
| Si | 9.44357591728411  | -2.05239875686329 | -1.43632806896740 |
| Si | -2.38463215822380 | -5.99903755535598 | -1.11409212625906 |
| Si | 1.14805364746641  | -3.86556598631671 | -1.00404877891348 |
| Si | 4.72339636708017  | -1.97737763850358 | -1.07549592530095 |

|    |                   |                   |                   |
|----|-------------------|-------------------|-------------------|
| Si | 8.27345327227421  | 0.00446743888117  | -1.39481993077874 |
| Si | -4.74242020225066 | -6.26236474358719 | -1.25083295477525 |
| Si | -1.19823013578058 | -3.96309286125790 | -1.05147647867303 |
| Si | 2.37736136980282  | -1.86909000164076 | -0.89885293589557 |
| Si | 5.93575233202766  | 0.02313727129062  | -1.23279333648474 |
| Si | 9.46779273864824  | 2.04516387095073  | -1.53410059686907 |
| Si | 8.31542894190851  | 4.15653661599030  | -1.52395998182736 |
| Si | 4.86175682229815  | 2.11279239123068  | -1.21020115003765 |
| Si | 1.14276986249620  | 0.13246561663702  | -0.69809554505517 |
| Si | -2.49121991292813 | -2.01723449915466 | -1.04688225352359 |
| Si | -5.92445179976467 | -4.19468758824608 | -1.30286299246089 |
| Si | -4.84850790983211 | -2.08667743035961 | -1.18569491326165 |
| Si | -1.17197746383671 | -0.08400357691500 | -0.68648248852150 |
| Si | 2.49851239765492  | 2.03675961082672  | -1.08305893386766 |
| Si | 5.94265026027355  | 4.21994475419107  | -1.33743502553063 |
| Si | -8.29667088796490 | -4.14275097432379 | -1.50046118532428 |
| Si | -9.48103880607559 | -2.04897584323996 | -1.52738767081158 |
| Si | -5.96534827202618 | -0.02066377896034 | -1.23863218756967 |
| Si | -2.41215320000954 | 1.91265457076229  | -0.96248263486739 |
| Si | 1.21997731589086  | 3.99427483341629  | -1.06437022719035 |
| Si | 4.76191603978886  | 6.29106662414815  | -1.28327610924620 |
| Si | -8.30419298816430 | 0.00234555371078  | -1.40376731379980 |
| Si | -4.75981669858190 | 1.98668890276876  | -1.11479345020641 |
| Si | -1.12702614421434 | 3.87167636539516  | -1.03224934310085 |
| Si | 2.40412693327817  | 6.02946122867250  | -1.13794037494031 |
| Si | -9.45406876578612 | 2.07135072608426  | -1.46230960446733 |
| Si | -5.83327418469860 | 4.09125917615944  | -1.19443055873742 |
| Si | -2.32364523885545 | 5.90343679711244  | -1.06296020096308 |
| Si | 1.19588975873702  | 8.06767446473989  | -1.09558653808374 |
| Si | -8.20186188522449 | 4.11823943309084  | -1.37812441399293 |
| Si | -4.67893136890361 | 6.16575407140574  | -1.13213695283679 |
| Si | -1.19333690439628 | 7.98511914567707  | -1.06572293397423 |
| Si | -1.21891560070369 | -8.00451679255123 | 1.32275232581271  |
| Si | 1.19532868505996  | -7.95650726489896 | 1.35267653046526  |
| Si | 2.40092687211888  | -5.91247137032291 | 1.37168467327172  |
| Si | 4.78161890116428  | -6.14426430100323 | 1.32030906451282  |
| Si | 5.98657659717271  | -4.08744239395902 | 1.23542246213666  |
| Si | 8.35375160915692  | -4.09678633441190 | 1.05439045767966  |
| Si | 9.57909114864107  | -2.01925998879343 | 0.96430421053643  |
| Si | -2.49012949934853 | -6.00321141915847 | 1.28528088450366  |
| Si | 1.15009778764111  | -3.88699423205115 | 1.41351814751397  |
| Si | 4.90586491669805  | -1.99660516704031 | 1.33064147920772  |
| Si | 8.42932839666188  | 0.05610649053214  | 1.00242819956285  |
| Si | -4.86593760908894 | -6.28966149082045 | 1.16966720841781  |

|    |                   |                   |                   |
|----|-------------------|-------------------|-------------------|
| Si | -1.26566117046434 | -3.96298197411219 | 1.36548933011555  |
| Si | 2.55004662759753  | -1.95551126773949 | 1.48561398035233  |
| Si | 6.08053807116197  | 0.06163832489788  | 1.17865314992415  |
| Si | 9.63093703128018  | 2.10522982768060  | 0.86510593104947  |
| Si | 8.49963852144667  | 4.23582325370344  | 0.86725835241071  |
| Si | 5.09580191586271  | 2.20487672181533  | 1.18425532173579  |
| Si | 1.62295834522925  | 0.19293491663523  | 1.68989526563040  |
| Si | -2.76224417137334 | -2.12765515127502 | 1.32973739351688  |
| Si | -6.12426398421758 | -4.26561174340014 | 1.08782805455667  |
| Si | -5.08658755230292 | -2.16746412278174 | 1.21232118134308  |
| Si | -1.65784241391405 | -0.13180882004675 | 1.69292888298739  |
| Si | 2.77592948061429  | 2.15350378862039  | 1.28959310876458  |
| Si | 6.13698010167353  | 4.29927122019035  | 1.05624682277181  |
| Si | -8.48757446131340 | -4.21261702129807 | 0.89120413581983  |
| Si | -9.64323820473536 | -2.09333254311433 | 0.87150856368922  |
| Si | -6.11344012643969 | -0.04175857730508 | 1.17367203232512  |
| Si | -2.60035499722404 | 1.98813207093742  | 1.41742382152874  |
| Si | 1.28435338801207  | 3.98671048239619  | 1.35728572082356  |
| Si | 4.88540779655135  | 6.32600890281635  | 1.13618789945717  |
| Si | -8.46246998902736 | -0.03121628602733 | 0.99198974404773  |
| Si | -4.94731400870648 | 2.01883926310564  | 1.29121434072783  |
| Si | -1.12043962359121 | 3.85591917699802  | 1.39916614925711  |
| Si | 2.51158253974363  | 6.02708898414292  | 1.26205656652855  |
| Si | -9.59821133692206 | 2.05316824776941  | 0.93787085450864  |
| Si | -6.00073440656888 | 4.11829141579370  | 1.20079729451135  |
| Si | -2.36750242933879 | 5.89055047046372  | 1.33548977939983  |
| Si | 1.23414167574000  | 8.02338047043999  | 1.30643350207079  |
| Si | -8.36790532366855 | 4.12993036080539  | 1.01779342595622  |
| Si | -4.74904767454362 | 6.14802525263682  | 1.28707047201160  |
| Si | -1.17947366861768 | 7.94692211694348  | 1.33850310493650  |
| H  | 1.71618096319445  | -9.07992693152165 | 2.19870016495261  |
| H  | 1.83771376227956  | -9.04694278377352 | -1.88396695478956 |
| H  | -5.22966580174821 | -7.37230543798836 | -2.13150407596511 |
| H  | -8.93281565456136 | -5.14089015399644 | -2.42009910675834 |
| H  | -8.79900152492217 | 5.16956424209593  | -2.26410125857962 |
| H  | -5.19792333311605 | 7.27233747094358  | -1.99840304714385 |
| H  | -1.82884351778512 | 9.06420774259417  | -1.88936093205426 |
| H  | 1.74000658365643  | 9.18328164919805  | -1.93551803538208 |
| H  | 5.24853315761167  | 7.39996677539522  | -2.16555667027877 |
| H  | 8.96899232945654  | 5.13790588484076  | -2.44931327118487 |
| H  | 8.78074669473916  | -5.15776090893909 | -2.21951273604969 |
| H  | 5.23304580297020  | -7.26178433660562 | -1.96674681828377 |
| H  | 5.36053745766197  | -7.23448403267662 | 2.16980873102175  |
| H  | 9.11981973432522  | -5.12145371521463 | 1.83579659210860  |



|   |                    |                   |                   |
|---|--------------------|-------------------|-------------------|
| H | 9.29465244047661   | 5.26955786249843  | 1.60543823476531  |
| H | 5.46827101916720   | 7.45373939912883  | 1.93255882337132  |
| H | 1.72644782168025   | 9.15244297787423  | 2.16173613000515  |
| H | -1.71064487845922  | 9.05686361900846  | 2.19622221086810  |
| H | -5.31263939596457  | 7.24694481754153  | 2.13602825319065  |
| H | -9.13451757278206  | 5.16022317654049  | 1.79132348688382  |
| H | -9.28059513560548  | -5.24897331020135 | 1.62820078363061  |
| H | -5.44379757676461  | -7.41574044331917 | 1.97196483194011  |
| H | -1.73147474496136  | -9.15101592749300 | -1.92183683542559 |
| H | -1.72301628435441  | -9.13205000351274 | 2.17297711885456  |
| C | -0.55243197583351  | -0.19701388335770 | 3.29840667290425  |
| O | -0.28893955257055  | -1.46278255191661 | 3.82968879077184  |
| O | 0.63356743843210   | 0.56316646108147  | 3.01734684814696  |
| H | -1.07581217952357  | 0.35817774480949  | 4.09680458861427  |
| H | -0.02471068446784  | -2.06626508764670 | 3.10226735652886  |
| H | -10.94528178387952 | -2.18866933737091 | 1.61145758845846  |
| H | -10.67309740708503 | -2.10421326770682 | -2.43676155831039 |
| H | -10.88827894599960 | 2.16726702662683  | 1.69577849102970  |
| H | -10.64390668082337 | 2.17645529638406  | -2.36981664396267 |
| H | 10.86416366294152  | -2.12177625210372 | 1.73207410535485  |
| H | 10.63238818438784  | -2.15746814161872 | -2.34499710389223 |
| H | 10.93401084528304  | 2.19097926833503  | 1.60450790855110  |
| H | 10.66144206565715  | 2.07485028458491  | -2.44273342851290 |

- **2Si-CO**

|    |                   |                   |                   |
|----|-------------------|-------------------|-------------------|
| Si | -1.17641290332217 | -8.31036460961193 | -1.25561236119560 |
| Si | 1.22519645266937  | -8.23773138785175 | -1.25282968383446 |
| Si | 2.37154721266102  | -6.16095259767821 | -1.23087599478809 |
| Si | 4.74841585070972  | -6.25953974360654 | -1.23589966963622 |
| Si | 5.76548592967413  | -4.10941413555782 | -1.21621243182957 |
| Si | 8.13793617722938  | -4.10298007360279 | -1.22567767027084 |
| Si | 9.31792868035921  | -2.01443057887319 | -1.22313848326931 |
| Si | -2.41525818635400 | -6.28458670118223 | -1.24186675089630 |
| Si | 1.13584673683960  | -4.14727121387690 | -1.21941352189859 |
| Si | 4.58192725204870  | -2.06228082315166 | -1.20491388894608 |
| Si | 8.07613739050461  | 0.00121661991838  | -1.21808217869015 |
| Si | -4.79241252953398 | -6.37858150414578 | -1.24904219299018 |
| Si | -1.22186676179471 | -4.24691401283803 | -1.21881068815276 |
| Si | 2.22420291527882  | -2.05285910041443 | -1.18405380338625 |
| Si | 5.72502687697614  | 0.00056993659906  | -1.20969257216366 |
| Si | 9.31746180850420  | 2.01733937265572  | -1.22242499218369 |
| Si | 8.13680893221414  | 4.10544780948690  | -1.22451227763298 |
| Si | 4.58125179383944  | 2.06286046101458  | -1.20460755069833 |

|    |                   |                   |                   |
|----|-------------------|-------------------|-------------------|
| Si | 1.06092289043139  | 0.00020918932396  | -1.21781868639352 |
| Si | -2.24489640552860 | -2.11727578359198 | -1.33362537910900 |
| Si | -5.75623660542298 | -4.20102490530707 | -1.23554529963705 |
| Si | -4.59806767012229 | -2.14011322663162 | -1.23192274703117 |
| Si | -1.27329887296606 | -0.00020889349326 | -1.27860053189540 |
| Si | 2.22351499848800  | 2.05358572393469  | -1.18364881070863 |
| Si | 5.76416996287224  | 4.11053352790788  | -1.21525400082479 |
| Si | -8.12772082435492 | -4.12726758594879 | -1.22303204284731 |
| Si | -9.22913872253399 | -1.99596841847761 | -1.21855555625969 |
| Si | -5.60223815758605 | -0.00098278559658 | -1.24539675220264 |
| Si | -2.24575013757482 | 2.11649121136410  | -1.33329828622374 |
| Si | 1.13401172509816  | 4.14744857617485  | -1.21946809742755 |
| Si | 4.74651807520329  | 6.26037416696821  | -1.23507616848882 |
| Si | -7.95566028352949 | -0.00108019853413 | -1.22178857436821 |
| Si | -4.59901809218335 | 2.13859149523476  | -1.23242367248680 |
| Si | -1.22351582224723 | 4.24673246073894  | -1.21914733572863 |
| Si | 2.36955742019378  | 6.16138479272815  | -1.23055059175584 |
| Si | -9.22981456309917 | 1.99322175678821  | -1.21938690981610 |
| Si | -5.75764436081905 | 4.19907602704348  | -1.23694574768655 |
| Si | -2.41725573244540 | 6.28416098567767  | -1.24307606603340 |
| Si | 1.22309608631811  | 8.23809138475092  | -1.25295638496577 |
| Si | -8.12904669747914 | 4.12497962923700  | -1.22460944323422 |
| Si | -4.79438104378163 | 6.37697330103439  | -1.25068233294963 |
| Si | -1.17863356217908 | 8.31018143362112  | -1.25668610427512 |
| Si | -1.18064242668935 | -8.33321027793423 | 1.14379060029375  |
| Si | 1.22184543143132  | -8.25860219248721 | 1.15385266419375  |
| Si | 2.36842319907606  | -6.17905306090893 | 1.17223688640275  |
| Si | 4.74733825318995  | -6.27170083854034 | 1.18455559234096  |
| Si | 5.77348995223324  | -4.12359359953514 | 1.18634772022759  |
| Si | 8.14555635506864  | -4.11179863972165 | 1.17645963752534  |
| Si | 9.32151099578992  | -2.01826635631039 | 1.18135819169701  |
| Si | -2.41779952781615 | -6.30795344466499 | 1.16010755142023  |
| Si | 1.13303561562250  | -4.16454759839097 | 1.18816642216712  |
| Si | 4.59500248557641  | -2.07343722738173 | 1.20113653485221  |
| Si | 8.08282699852876  | 0.00091652628646  | 1.19094928296181  |
| Si | -4.79386492332217 | -6.38799753835076 | 1.17130335642161  |
| Si | -1.22085011428036 | -4.27889697590941 | 1.18511315666927  |
| Si | 2.23778260890566  | -2.07482407303116 | 1.21591269043248  |
| Si | 5.72874442039071  | 0.00039392518820  | 1.20146556089574  |
| Si | 9.32080907380915  | 2.02066871200638  | 1.18214468462766  |
| Si | 8.14401713047842  | 4.11362201477859  | 1.17779015231509  |
| Si | 4.59422139899619  | 2.07382117899643  | 1.20156139531410  |
| Si | 1.11831719683073  | 0.00009987526249  | 1.17964153294646  |
| Si | -2.24104050495328 | -2.16003881098637 | 1.07619980887277  |

|    |                   |                   |                   |
|----|-------------------|-------------------|-------------------|
| Si | -5.75310984430352 | -4.20645516721467 | 1.16972733052004  |
| Si | -4.59891673545076 | -2.14495631252293 | 1.16595912287486  |
| Si | -1.24790835637979 | -0.00003239010561 | 1.33468589406055  |
| Si | 2.23689581135580  | 2.07553311386039  | 1.21640274485491  |
| Si | 5.77180140310852  | 4.12456211223607  | 1.18750041730394  |
| Si | -8.12323474282982 | -4.13198393729896 | 1.17769252406333  |
| Si | -9.22060052291764 | -1.99766720251018 | 1.18692190428542  |
| Si | -5.59210382497065 | -0.00067468127501 | 1.18035225284380  |
| Si | -2.24201639544045 | 2.15954018933038  | 1.07629607579197  |
| Si | 1.13101834052227  | 4.16461927029327  | 1.18822547721228  |
| Si | 4.74487231001552  | 6.27225622224262  | 1.18549628811588  |
| Si | -7.94649082774435 | -0.00068796795847 | 1.18378608881589  |
| Si | -4.59977948155219 | 2.14404951218810  | 1.16534873727718  |
| Si | -1.22295218371478 | 4.27892024342623  | 1.18475184505211  |
| Si | 2.36577554590226  | 6.17945663977045  | 1.17249528783665  |
| Si | -9.22129701999016 | 1.99567950378675  | 1.18609141716261  |
| Si | -5.75468719547913 | 4.20510234973234  | 1.16826546364442  |
| Si | -2.42022337231470 | 6.30777978811809  | 1.15887078006518  |
| Si | 1.21889370766296  | 8.25884082003340  | 1.15378160521928  |
| Si | -8.12461533945882 | 4.13038735861435  | 1.17603365752803  |
| Si | -4.79621981278542 | 6.38708064615983  | 1.16957710585380  |
| Si | -1.18354075426364 | 8.33327229078616  | 1.14275380717648  |
| H  | 1.80658326719808  | -9.36970114089125 | 1.97308536874323  |
| H  | 1.81404190233132  | -9.33347753204786 | -2.08951918413093 |
| H  | -5.45234869281432 | -7.41809478989241 | -2.10292891216322 |
| H  | -8.85294644591687 | -5.13147092746710 | -2.06688160980905 |
| H  | -8.85418334156126 | 5.12889873807274  | -2.06885718661417 |
| H  | -5.45446035818721 | 7.41613395067358  | -2.10485431806227 |
| H  | -1.70633643274245 | 9.43119473424564  | -2.09977359586070 |
| H  | 1.81202178000726  | 9.33397182178205  | -2.08938983755802 |
| H  | 5.38132755785817  | 7.30179714878153  | -2.10556739845485 |
| H  | 8.82220077355694  | 5.13664423775582  | -2.06943659481646 |
| H  | 8.82348479640584  | -5.13383740359091 | -2.07082905629547 |
| H  | 5.38327542531784  | -7.30053770129623 | -2.10682971434590 |
| H  | 5.37899785413419  | -7.32360333008667 | 2.04492737787346  |
| H  | 8.84530871987253  | -5.14386081937984 | 2.00825506955093  |
| H  | 8.84326819781656  | 5.14582009911454  | 2.00991008659978  |
| H  | 5.37627133830950  | 7.32398381697376  | 2.04624650477006  |
| H  | 1.80327413143494  | 9.36989071532128  | 1.97330853227999  |
| H  | -1.71575447492726 | 9.47132294133753  | 1.95971609459209  |
| H  | -5.46454053721385 | 7.42716872099498  | 2.01640926190844  |
| H  | -8.84803806592593 | 5.13766018898683  | 2.01774067496285  |
| H  | -8.84640197910397 | -5.13926068857973 | 2.01965235567439  |
| H  | -5.46155077515340 | -7.42819804282736 | 2.01852582768173  |

|   |                    |                   |                   |
|---|--------------------|-------------------|-------------------|
| H | -1.70398099868466  | -9.43163686071324 | -2.09843137532240 |
| H | -1.71253848170540  | -9.47116646017907 | 1.96103589701080  |
| C | -1.33898583744532  | 0.00076394960930  | 3.26684618353576  |
| O | -1.50477467248713  | 0.00129034478958  | 4.40990266211030  |
| H | -10.45381786611922 | -2.00996024559482 | 2.03932376394998  |
| H | -10.46759847207252 | -2.00711244282674 | -2.06343012005240 |
| H | -10.45452796918271 | 2.00755462117877  | 2.03849325940845  |
| H | -10.46835480118605 | 2.00351473376256  | -2.06414591507281 |
| H | 10.55937566567465  | -2.07088825045094 | 2.02505503975155  |
| H | 10.55306991057505  | -2.05859898745730 | -2.07102832170552 |
| H | 10.55857002508910  | 2.07340646379173  | 2.02593535772616  |
| H | 10.55271695575444  | 2.06207548382071  | -2.07016914318948 |

- **2Si-CO + H<sub>2</sub>**

|    |                   |                   |                   |
|----|-------------------|-------------------|-------------------|
| Si | 1.27704740887920  | 8.05944768564028  | -1.29401284378615 |
| Si | -1.12223306446154 | 8.09153623494149  | -1.29148620198872 |
| Si | -2.31551170642228 | 6.04616767279858  | -1.28569665258283 |
| Si | -4.68733158795269 | 6.21149135567310  | -1.28561238473711 |
| Si | -5.74642000340085 | 4.08504584883968  | -1.26230990713930 |
| Si | -8.11961277536633 | 4.12252729884836  | -1.25836373350837 |
| Si | -9.37476763538724 | 2.07374613781150  | -1.24903009832793 |
| Si | 2.45704406642084  | 6.00090480209922  | -1.28766814677043 |
| Si | -1.10994641308583 | 4.01389893572414  | -1.28291758725514 |
| Si | -4.60640833915271 | 2.01316727704665  | -1.26569127295388 |
| Si | -8.19105940891073 | 0.02303060374021  | -1.25162388548421 |
| Si | 4.82149482343437  | 6.16589224242922  | -1.29957596823670 |
| Si | 1.24356867073664  | 3.96766654848686  | -1.27762007543253 |
| Si | -2.24478410534956 | 1.95687860623148  | -1.25840042883403 |
| Si | -5.83842649093541 | 0.01000119096007  | -1.25831423760946 |
| Si | -9.39933272514965 | -2.01507154977260 | -1.23855577049250 |
| Si | -8.16796283892060 | -4.07773844602395 | -1.23716220672453 |
| Si | -4.62014550598560 | -2.00611298677823 | -1.26102241064029 |
| Si | -0.97208923883406 | -0.03301163963705 | -1.37408444834716 |
| Si | 2.23896966989050  | 1.82381742238694  | -1.38672861275972 |
| Si | 5.77737119485281  | 3.99683555729022  | -1.28805992157868 |
| Si | 4.58142621093412  | 1.95783398344581  | -1.30997354434294 |
| Si | 1.26165364931756  | -0.20217215528986 | -1.88203788758150 |
| Si | -2.26648427194448 | -1.99078996385557 | -1.28469705131088 |
| Si | -5.79534935178025 | -4.05491435544061 | -1.24291037180405 |
| Si | 8.14725408827539  | 3.97269259751880  | -1.28248693537437 |
| Si | 9.27937205829091  | 1.86321273110696  | -1.27912696645045 |
| Si | 5.65295231479755  | -0.13346710349737 | -1.32158605558677 |
| Si | 2.28726948698180  | -2.07006736894221 | -2.61580442487523 |

|    |                   |                   |                   |
|----|-------------------|-------------------|-------------------|
| Si | -1.08750581353465 | -4.01672755508268 | -1.30366615481713 |
| Si | -4.71170975075983 | -6.16864107965608 | -1.25415296348127 |
| Si | 8.00945898598383  | -0.13297121811302 | -1.29733720770610 |
| Si | 4.26488621270878  | -2.03481221287626 | -1.37460483818180 |
| Si | 1.25088481091978  | -3.75423486528083 | -1.36812865964922 |
| Si | -2.33874610190081 | -6.02403912079537 | -1.26919945799895 |
| Si | 9.28356484687869  | -2.12107691965331 | -1.28875231780232 |
| Si | 5.61512446667450  | -3.96995228681608 | -1.31927971646066 |
| Si | 2.25346705308448  | -5.89045087057468 | -1.31012599158643 |
| Si | -1.22204954719028 | -8.10807088179791 | -1.26499512528129 |
| Si | 7.97740390071154  | -4.12253191552447 | -1.28927590595056 |
| Si | 4.60928160884076  | -6.11020909988136 | -1.30545108767473 |
| Si | 1.16746307963409  | -7.99425764800496 | -1.27475345582275 |
| Si | 1.28053348222283  | 8.06934061461108  | 1.11029702305963  |
| Si | -1.11789181628663 | 8.09758186788839  | 1.11555681216707  |
| Si | -2.30763097969365 | 6.04941704817722  | 1.12159832031485  |
| Si | -4.67921270494483 | 6.21781636288689  | 1.13852228657324  |
| Si | -5.74038853178533 | 4.09268435788792  | 1.13765201766601  |
| Si | -8.11301162854637 | 4.12952553553828  | 1.14454920418958  |
| Si | -9.36548543228669 | 2.07925416160571  | 1.15564584510795  |
| Si | 2.45792732508304  | 6.01014795394103  | 1.11472158545467  |
| Si | -1.10414321371027 | 4.01549361153419  | 1.11577106006310  |
| Si | -4.60237488863087 | 2.01981309617981  | 1.13781933298859  |
| Si | -8.18181885958130 | 0.02805487223488  | 1.15677998471650  |
| Si | 4.82135483651354  | 6.16496488576186  | 1.12497751185795  |
| Si | 1.24673152795140  | 3.97897359133191  | 1.12749333144826  |
| Si | -2.24330540570054 | 1.96290079352295  | 1.14227654442799  |
| Si | -5.82860849838093 | 0.01292886802493  | 1.14879492254368  |
| Si | -9.39179459054542 | -2.00886521612541 | 1.16440635787667  |
| Si | -8.16143383262380 | -4.07250889544462 | 1.16694949669057  |
| Si | -4.60955367681885 | -2.00374043679101 | 1.14657561208048  |
| Si | -0.97781379087323 | -0.02230375004829 | 1.05621753356879  |
| Si | 2.23879866475581  | 1.84396213482628  | 1.04414031218076  |
| Si | 5.77378438096515  | 3.99409917107828  | 1.11527169566328  |
| Si | 4.58432840939206  | 1.95254998333268  | 1.08351516880247  |
| Si | 1.25037961349891  | -0.16416724565813 | 1.86133428559566  |
| Si | -2.25566253709347 | -1.99273369834135 | 1.11043285440796  |
| Si | -5.78867256032519 | -4.04908075218522 | 1.16171515846902  |
| Si | 8.14206149584460  | 3.97406739779030  | 1.12266289881659  |
| Si | 9.26152176829974  | 1.85963013862689  | 1.12610367931118  |
| Si | 5.63049515072991  | -0.15024528809109 | 1.07714304747633  |
| Si | 2.35122003115334  | -2.15794697983841 | 2.53771825996340  |
| Si | -1.05154949813760 | -4.00367009636739 | 1.09095144058678  |
| Si | -4.69175557379065 | -6.15410524940584 | 1.16820939754159  |

|    |                    |                   |                   |
|----|--------------------|-------------------|-------------------|
| Si | 7.98772505452111   | -0.13495531313589 | 1.10706372063010  |
| Si | 4.20188067920141   | -2.02701553677153 | 1.10525703182440  |
| Si | 1.28666880916727   | -3.69152783747910 | 1.11572414750914  |
| Si | -2.31770768931089  | -6.00342998558309 | 1.13188374708540  |
| Si | 9.27233331013382   | -2.11532431394138 | 1.11710044338986  |
| Si | 5.59229475083990   | -3.94070542795383 | 1.08228007658951  |
| Si | 2.24791131685549   | -5.85323780348649 | 1.09265212827358  |
| Si | -1.21400887916068  | -8.09357074329381 | 1.14008871652078  |
| Si | 7.95596577158458   | -4.10676084460291 | 1.11253767946261  |
| Si | 4.60070828298524   | -6.08617802881074 | 1.10345056063366  |
| Si | 1.17214681991584   | -7.96488798329263 | 1.13021278900908  |
| H  | -1.66252862612122  | 9.21364736319806  | 1.95458172821744  |
| H  | -1.66494680298510  | 9.20619232547203  | -2.13364170525047 |
| H  | 5.43919541532804   | 7.21202508573847  | -2.17651460050636 |
| H  | 8.84020072335269   | 4.99823618888229  | -2.12772882525427 |
| H  | 8.58573509754220   | -5.21051682177872 | -2.12193122271118 |
| H  | 5.20533693064357   | -7.15805164148518 | -2.19668760700083 |
| H  | 1.79017505072426   | -9.07594029281199 | -2.10526417966171 |
| H  | -1.77518747741217  | -9.21079773297965 | -2.11625245411481 |
| H  | -5.32914599144087  | -7.23605054393403 | -2.10580162645347 |
| H  | -8.84622221686774  | -5.12424206614034 | -2.06881519133346 |
| H  | -8.78461894042825  | 5.17461248574271  | -2.09367023916066 |
| H  | -5.29547619745387  | 7.27004001757992  | -2.15422038773897 |
| H  | -5.27832990240887  | 7.28274771386422  | 2.00560806751022  |
| H  | -8.77483859396334  | 5.18590102890929  | 1.97694897180976  |
| H  | -8.83703539798791  | -5.11419949961884 | 2.00667983508048  |
| H  | -5.27842997434419  | -7.22140852071023 | 2.04138328804518  |
| H  | -1.76277371170325  | -9.18394830855087 | 2.00961608199021  |
| H  | 1.81946667668143   | -9.01438132864421 | 1.98290614332297  |
| H  | 5.19627725499326   | -7.11900915200834 | 2.01229715964021  |
| H  | 8.52897985900251   | -5.19582969737815 | 1.96846054577572  |
| H  | 8.83354449826638   | 4.99834469955165  | 1.97037456457923  |
| H  | 5.44789623845354   | 7.20537684597555  | 2.00235566456411  |
| H  | 1.84715164016709   | 9.16018730607387  | -2.13635803235516 |
| H  | 1.85543863184293   | 9.17538790611245  | 1.94230432907834  |
| C  | 0.77884463048162   | 0.64582921146441  | 3.48697845028332  |
| O  | 0.47274261066166   | 1.17151920552496  | 4.46904972349226  |
| H  | 10.49185217721803  | 1.87150387766927  | 1.98218201914154  |
| H  | 10.52191003265433  | 1.89301875603892  | -2.11705499573106 |
| H  | 10.48626764284704  | -2.17508934218820 | 1.99385326546789  |
| H  | 10.50657404511957  | -2.18809825143101 | -2.15255370934894 |
| H  | -10.61321361010524 | 2.17057514939125  | -2.08742388529355 |
| H  | -10.59753997322294 | 2.17843872408619  | 2.00314791174790  |
| H  | -10.63691079828887 | -2.09528096507523 | -2.07976517046622 |

|   |                    |                   |                  |
|---|--------------------|-------------------|------------------|
| H | -10.62419141185557 | -2.08307082973197 | 2.01377324763275 |
| H | 1.78986109812315   | -0.98249866192978 | 6.26925671164669 |
| H | 2.04681054727549   | -1.45448874473721 | 5.73295501574527 |

• **2Si-OCH**

|    |                   |                   |                   |
|----|-------------------|-------------------|-------------------|
| Si | 1.29670409766882  | 8.04073974914943  | -1.26089469803576 |
| Si | -1.10300657167847 | 8.07318989310066  | -1.25192232294959 |
| Si | -2.29685682875639 | 6.02890819881033  | -1.25580087120553 |
| Si | -4.66724094252220 | 6.19647966851663  | -1.24973222325496 |
| Si | -5.72490822068220 | 4.06856850112863  | -1.23806456288222 |
| Si | -8.09679212331449 | 4.11098344407876  | -1.22602773538951 |
| Si | -9.36205995161093 | 2.06750712857283  | -1.22649223383128 |
| Si | 2.47673014847395  | 5.98313608924288  | -1.27769040974791 |
| Si | -1.09648701671236 | 3.99517895854620  | -1.27993375292123 |
| Si | -4.59459281203899 | 1.99161926505011  | -1.25702887482035 |
| Si | -8.18953358545868 | 0.01038283047513  | -1.24017401169572 |
| Si | 4.83877451131037  | 6.17053398814519  | -1.29222460941221 |
| Si | 1.25256749866036  | 3.95548484102015  | -1.27786923445015 |
| Si | -2.23343541829933 | 1.94372932200896  | -1.26057161303232 |
| Si | -5.83731605246494 | -0.00501284203970 | -1.25196571638311 |
| Si | -9.40643909058953 | -2.02254635784088 | -1.23348601253117 |
| Si | -8.18998241051914 | -4.09529410212557 | -1.24158228048110 |
| Si | -4.64154128285113 | -2.03448366168730 | -1.26325651126361 |
| Si | -0.97272603359758 | -0.05224152808148 | -1.34291909717411 |
| Si | 2.25667307912824  | 1.81623076932288  | -1.34878368246067 |
| Si | 5.80522334101535  | 4.00576458175869  | -1.28839135157344 |
| Si | 4.60051693919042  | 1.97214838256392  | -1.29446094926829 |
| Si | 1.24779702595346  | -0.17543616397313 | -1.93272792083604 |
| Si | -2.28756301995513 | -2.00018559781353 | -1.27428864159814 |
| Si | -5.81662077164120 | -4.08330122490845 | -1.25443974114438 |
| Si | 8.17403224376030  | 3.98106769849013  | -1.29055510428141 |
| Si | 9.31412253981123  | 1.87472898988050  | -1.29589726794548 |
| Si | 5.68779874691941  | -0.10874624364281 | -1.28920508166381 |
| Si | 2.28630753626661  | -2.07219740645428 | -2.54156720019084 |
| Si | -1.12610916368597 | -4.03501667437067 | -1.26689835941305 |
| Si | -4.73854241621968 | -6.19989449787401 | -1.27389479441188 |
| Si | 8.04562353965205  | -0.12358976371945 | -1.29701877550800 |
| Si | 4.27473168644775  | -2.00067956905466 | -1.30136387586994 |
| Si | 1.21665453697557  | -3.74364157476173 | -1.28584654539100 |
| Si | -2.36345113558298 | -6.05289530943998 | -1.27195635117571 |
| Si | 9.29985009739470  | -2.12478130119909 | -1.28769378445105 |
| Si | 5.61370513328957  | -3.95551506225463 | -1.26014880589488 |
| Si | 2.24153040930270  | -5.87998218799243 | -1.24835560574160 |

|    |                   |                   |                   |
|----|-------------------|-------------------|-------------------|
| Si | -1.22460918378544 | -8.12566608265299 | -1.26530893917349 |
| Si | 7.97677849369940  | -4.11591721837834 | -1.27559009548719 |
| Si | 4.59956455500363  | -6.09354329192378 | -1.26716484188393 |
| Si | 1.16430904599226  | -7.99011998344579 | -1.26346128918940 |
| Si | 1.30535982836071  | 8.02681561043368  | 1.14423508836932  |
| Si | -1.09322213532602 | 8.05937347165364  | 1.15513361588269  |
| Si | -2.27977657250644 | 6.01067164574081  | 1.15060398320025  |
| Si | -4.64967041142406 | 6.18492352815120  | 1.17423945879342  |
| Si | -5.70954910289697 | 4.05868779968584  | 1.16212778574748  |
| Si | -8.08223756518057 | 4.10280441805048  | 1.17713720741300  |
| Si | -9.34984669466521 | 2.06150139969216  | 1.17836700660371  |
| Si | 2.48041584459222  | 5.96704082916357  | 1.12425606929878  |
| Si | -1.07902337403614 | 3.97565500864610  | 1.12754671496819  |
| Si | -4.57334984471282 | 1.98488361112936  | 1.14787447473958  |
| Si | -8.17581949911807 | 0.00616325010338  | 1.16750270551004  |
| Si | 4.84164814647973  | 6.16304552372665  | 1.13128898811088  |
| Si | 1.26392208590585  | 3.93696355455347  | 1.13093910551540  |
| Si | -2.21226760655516 | 1.92815508797644  | 1.14260768360977  |
| Si | -5.82367765469078 | -0.00745338050558 | 1.15418225568959  |
| Si | -9.39559181243774 | -2.02498952298186 | 1.16962781640078  |
| Si | -8.17997117875402 | -4.09669733010781 | 1.16221804710254  |
| Si | -4.62766387710548 | -2.03568532962014 | 1.14350107552719  |
| Si | -0.93263521539025 | -0.05031289562852 | 1.09198087912558  |
| Si | 2.24175475296887  | 1.79453171465297  | 1.08592756246604  |
| Si | 5.80682319019801  | 3.99914097371075  | 1.11489261979747  |
| Si | 4.58886127845964  | 1.97129025369394  | 1.09642957146470  |
| Si | 1.12491981308480  | 0.05944979384751  | 2.20512452909078  |
| Si | -2.27149141007217 | -1.98675454029708 | 1.11735089343343  |
| Si | -5.80700954570224 | -4.08356449366611 | 1.15021066667168  |
| Si | 8.17669271400506  | 3.97932534498704  | 1.11491991593900  |
| Si | 9.32040702451903  | 1.87740097983140  | 1.10992472908163  |
| Si | 5.69324861698792  | -0.09916090819535 | 1.10790182428912  |
| Si | 2.26403385969568  | -2.00898576529812 | 2.30192008808741  |
| Si | -1.13104533323291 | -4.03263891830331 | 1.12565706322863  |
| Si | -4.73653310579622 | -6.20254103335956 | 1.14864155139533  |
| Si | 8.04777101869355  | -0.11673778123473 | 1.10905179935362  |
| Si | 4.30135120793843  | -1.99544221860781 | 1.14364884923898  |
| Si | 1.20567660820279  | -3.76840040122509 | 1.16381368661219  |
| Si | -2.36366333125826 | -6.04969298476020 | 1.13113398215550  |
| Si | 9.30304695627743  | -2.11528390666378 | 1.11835835629118  |
| Si | 5.61705236261473  | -3.95538928663410 | 1.13690425469053  |
| Si | 2.24920719722889  | -5.88578496738786 | 1.15031402759338  |
| Si | -1.22614017907757 | -8.12156110147729 | 1.13999137818029  |
| Si | 7.98262110325529  | -4.10650703992296 | 1.12653568948742  |



|    |                    |                   |                   |
|----|--------------------|-------------------|-------------------|
| Si | 4.60543193367141   | -6.09253811640906 | 1.14435660410021  |
| Si | 1.16196418480315   | -7.99242957088667 | 1.14158537593578  |
| H  | -1.63416109469714  | 9.16941919650871  | 2.00453443785542  |
| H  | -1.64681183194244  | 9.19349552741718  | -2.08611310315333 |
| H  | 5.45472688707196   | 7.21645081933069  | -2.17075132383070 |
| H  | 8.87036235120701   | 5.00598948000598  | -2.13373082598475 |
| H  | 8.56640899265937   | -5.20855703434727 | -2.11532391900807 |
| H  | 5.19289066202984   | -7.13927699969348 | -2.16262379156864 |
| H  | 1.80249964011371   | -9.05462966289240 | -2.10409708887893 |
| H  | -1.75847056933944  | -9.23448494463284 | -2.12058611658683 |
| H  | -5.34596623380741  | -7.26466818487117 | -2.13573675677909 |
| H  | -8.87750748986298  | -5.13502265085238 | -2.07410741143716 |
| H  | -8.76385254818047  | 5.16844020661184  | -2.05315037866344 |
| H  | -5.27910402065888  | 7.25822149023234  | -2.11191640049446 |
| H  | -5.24667714211604  | 7.24234522145940  | 2.05185652768583  |
| H  | -8.73707750442867  | 5.15667989519141  | 2.01839442146981  |
| H  | -8.85629269399794  | -5.13949758482772 | 2.00002006481001  |
| H  | -5.33365927783300  | -7.27280899321388 | 2.01093346993552  |
| H  | -1.76563607764823  | -9.22168408703872 | 2.00297212266823  |
| H  | 1.79921672669944   | -9.05762183133831 | 1.98251767175128  |
| H  | 5.20485952367927   | -7.12746327628018 | 2.04846719119108  |
| H  | 8.57185976630785   | -5.19437666966775 | 1.97313138906905  |
| H  | 8.86863081279779   | 5.00528087530590  | 1.96032445506836  |
| H  | 5.45844278459855   | 7.20630007648276  | 2.01230316792203  |
| H  | 1.86197229261659   | 9.14919339577062  | -2.09682065679105 |
| H  | 1.88454446430488   | 9.12280554792398  | 1.98681790252242  |
| C  | 0.66276323028375   | 0.82555501302609  | 3.94526979118831  |
| O  | 0.12028815222624   | 1.91702258671276  | 4.00337952303779  |
| H  | 0.89151804467709   | 0.25353064501820  | 4.88963859336359  |
| H  | 2.46728201962731   | -2.33871819227063 | 3.75152363917380  |
| H  | 10.55811371953459  | 1.89719241587177  | 1.95499876021059  |
| H  | 10.54852624989242  | 1.90426466825222  | -2.14555157093285 |
| H  | 10.52050883956844  | -2.18886191008801 | 1.98903778031552  |
| H  | 10.51798228357078  | -2.21071972470977 | -2.15625953986415 |
| H  | -10.60052861373190 | 2.17461408165118  | -2.06383079970176 |
| H  | -10.58011353808678 | 2.16247988602629  | 2.02841629802959  |
| H  | -10.64650387405173 | -2.09611714501848 | -2.07184481540540 |
| H  | -10.62820138503735 | -2.09633309754100 | 2.01906208763535  |

- **2Si-(OH)<sub>2</sub>CH**

|    |                   |                   |                   |
|----|-------------------|-------------------|-------------------|
| Si | -1.41622588176249 | -8.03657790124436 | -1.17713076476023 |
| Si | 0.97260330840502  | -7.95233959624539 | -1.12945522080466 |
| Si | 2.14642024171217  | -5.89295363375973 | -1.09122529352977 |

|    |                   |                   |                   |
|----|-------------------|-------------------|-------------------|
| Si | 4.49519451031938  | -6.18386279640088 | -1.15584119997142 |
| Si | 5.63670878302621  | -4.11275421894449 | -1.23101375640349 |
| Si | 7.99126490852212  | -4.23444275096517 | -1.43246829024128 |
| Si | 9.24586402920312  | -2.20402454993502 | -1.58463664879907 |
| Si | -2.60827013800619 | -5.98963980605114 | -1.21047602151297 |
| Si | 0.98678024756563  | -3.84079337056712 | -1.06854909662774 |
| Si | 4.57520233405350  | -2.00803487368784 | -1.16077672431934 |
| Si | 8.10479578513972  | -0.12639642546658 | -1.53340394984238 |
| Si | -4.97303557584912 | -6.12611968817430 | -1.39267000222551 |
| Si | -1.34503745106284 | -4.00758164668585 | -1.10453818654318 |
| Si | 2.25646743850980  | -1.86932093403841 | -0.93842936757676 |
| Si | 5.76877903348223  | -0.00402712066294 | -1.28582613935970 |
| Si | 9.41917446034969  | 1.82075711474219  | -1.75956079593142 |
| Si | 8.18018799534732  | 3.86883167178490  | -1.75086303031428 |
| Si | 4.39130036724144  | 1.93334472172536  | -1.24228920855912 |
| Si | 1.32592643231688  | 0.31639015183749  | -0.90460807693659 |
| Si | -2.44160358360454 | -1.95037571564120 | -1.07091762006198 |
| Si | -6.00085006122944 | -3.97810535373552 | -1.44212192141492 |
| Si | -4.80583047340644 | -1.92923842639541 | -1.27243113630484 |
| Si | -0.97896145697928 | -0.10233156237181 | -0.68019482166150 |
| Si | 2.31252901105228  | 1.86214571597375  | -2.40052628556797 |
| Si | 5.82178103640227  | 3.83950774040340  | -1.43722132823723 |
| Si | -8.36620899360379 | -3.83633747435146 | -1.68848968369662 |
| Si | -9.47057597535366 | -1.70177249913680 | -1.69992787932772 |
| Si | -5.86742314347598 | 0.16514407967702  | -1.30858405094122 |
| Si | -2.18299177063394 | 1.92101734164585  | -0.94272220014791 |
| Si | 1.51293815881862  | 3.64206864402905  | -1.08641634720788 |
| Si | 4.84224585502786  | 6.00258656268490  | -1.40220333649010 |
| Si | -8.19956601692490 | 0.28642127075579  | -1.51966929875824 |
| Si | -4.52594014816786 | 2.07434986749635  | -1.13257402871123 |
| Si | -0.83448848912923 | 3.83644471473941  | -0.97530095797533 |
| Si | 2.49499564790982  | 5.79428900595617  | -1.20820092728720 |
| Si | -9.27972095041253 | 2.39284676379547  | -1.56926203462868 |
| Si | -5.56313740986498 | 4.19323095141456  | -1.22362638743143 |
| Si | -2.00170410887311 | 5.88335744958718  | -1.06722501151189 |
| Si | 1.44916197349884  | 7.92289192948313  | -1.19551919732511 |
| Si | -7.91797581342878 | 4.36023464490367  | -1.45104082321594 |
| Si | -4.34219954960420 | 6.21850013708165  | -1.14643948235118 |
| Si | -0.92616977736406 | 7.98416067262441  | -1.12483077850929 |
| Si | -1.47381957532020 | -8.01365238166984 | 1.22471972149674  |
| Si | 0.94449137765766  | -7.94123744497691 | 1.27461165517137  |
| Si | 2.19223627561633  | -5.91755079704227 | 1.30667370743196  |
| Si | 4.57533790245586  | -6.15720343895543 | 1.26463029320398  |
| Si | 5.80822344065045  | -4.11983132265232 | 1.16183126217514  |

|    |                   |                   |                   |
|----|-------------------|-------------------|-------------------|
| Si | 8.17285140516885  | -4.19479612770914 | 0.96289491992410  |
| Si | 9.44144285842318  | -2.14679119099655 | 0.81049677900858  |
| Si | -2.75572695135915 | -6.01919977519380 | 1.19056657076993  |
| Si | 0.95550214289917  | -3.88639258860573 | 1.34586926932846  |
| Si | 4.76832330571228  | -1.99879903901851 | 1.24472298268173  |
| Si | 8.36137157123344  | -0.03871737003119 | 0.85701650831180  |
| Si | -5.14009813073053 | -6.17990940737685 | 1.02295662349433  |
| Si | -1.44844212369932 | -4.03639502422156 | 1.30294655164367  |
| Si | 2.40747539134282  | -1.98345023137359 | 1.44771828418947  |
| Si | 6.01932955511707  | 0.00651665288427  | 1.11051935141300  |
| Si | 9.66828755971447  | 1.92974441902810  | 0.62783686451276  |
| Si | 8.48052765986092  | 4.01378490728319  | 0.63032740670966  |
| Si | 4.86305665082021  | 2.04903255676859  | 1.14711074583409  |
| Si | 1.75298834767443  | 0.27022718076776  | 1.49057435803010  |
| Si | -2.79944923229279 | -2.10483891494430 | 1.28461032765040  |
| Si | -6.25534069658527 | -4.07578551176559 | 0.94385291814059  |
| Si | -5.11458632450116 | -2.03475842875702 | 1.10956746169503  |
| Si | -1.61713656228876 | -0.15991657236838 | 1.65046842636818  |
| Si | 2.90380295289937  | 2.12138419050812  | 2.33540420830622  |
| Si | 6.13739872450471  | 3.98990014436707  | 0.93561094967402  |
| Si | -8.60869728159649 | -3.93414358902464 | 0.69848268503473  |
| Si | -9.68305156868804 | -1.77434093925799 | 0.69320984474555  |
| Si | -6.06327484025904 | 0.12556018068212  | 1.10035827338871  |
| Si | -2.40464995676516 | 2.02840089106513  | 1.43047422096324  |
| Si | 1.55114496500405  | 3.77133567322206  | 1.36662519685333  |
| Si | 5.01620674756476  | 6.07453159651037  | 1.00748927672467  |
| Si | -8.40792894184314 | 0.22658970041320  | 0.87488898537656  |
| Si | -4.75946728541640 | 2.10465265911418  | 1.26729428189551  |
| Si | -0.85284043424553 | 3.85052142673740  | 1.42766229490736  |
| Si | 2.64537486125053  | 5.86432745534586  | 1.17952360591050  |
| Si | -9.45068428734679 | 2.35837545619366  | 0.82729343759192  |
| Si | -5.75653038860586 | 4.22980979708638  | 1.17009222056591  |
| Si | -2.04753895738304 | 5.92137618828414  | 1.33260174141769  |
| Si | 1.51232673726433  | 7.93794131780277  | 1.20799342667869  |
| Si | -8.11486198765802 | 4.36853481766678  | 0.94489620962427  |
| Si | -4.42740612780334 | 6.20948351113367  | 1.27339229381982  |
| Si | -0.89058283022615 | 7.99069798157347  | 1.28017953175264  |
| H  | 1.45202981327632  | -9.07685765653134 | 2.11328485213095  |
| H  | 1.61309083658787  | -9.03214468298536 | -1.94827476170483 |
| H  | -5.50662797983074 | -7.19535231346218 | -2.29633574878997 |
| H  | -9.01356338106993 | -4.80067604341903 | -2.63594434767978 |
| H  | -8.42264173045979 | 5.45734236038016  | -2.33874314696542 |
| H  | -4.81120553734007 | 7.34295396399271  | -2.01868462855185 |
| H  | -1.57582760616178 | 9.03489640244684  | -1.97298517610233 |

|   |                    |                   |                   |
|---|--------------------|-------------------|-------------------|
| H | 2.07591913984739   | 8.96770031078395  | -2.06800180172337 |
| H | 5.37104616010046   | 7.04927470693596  | -2.33658119429516 |
| H | 8.72387934166452   | 4.87054343206623  | -2.72504882536371 |
| H | 8.53188332812820   | -5.33019656726066 | -2.30013876492995 |
| H | 5.00150014574650   | -7.29406058925949 | -2.02534195738145 |
| H | 5.12999730242576   | -7.24369893662876 | 2.13591171810010  |
| H | 8.91961600502076   | -5.21450347522792 | 1.76984031723437  |
| H | 9.24202972678837   | 5.10431961378649  | 1.32218185914547  |
| H | 5.65563738418844   | 7.15374354951299  | 1.83094711469787  |
| H | 2.10273666581931   | 9.03876924511371  | 2.03821557609911  |
| H | -1.38021343339240  | 9.12004785138889  | 2.13783773884804  |
| H | -4.97261866416346  | 7.31677155308107  | 2.12465301607233  |
| H | -8.84383086455144  | 5.42751408107295  | 1.71669993762143  |
| H | -9.44503848566304  | -4.95834709329519 | 1.40404435897678  |
| H | -5.80216519222634  | -7.27628074701380 | 1.80097019078049  |
| H | -1.95973961549241  | -9.14606506482298 | -2.02517243710612 |
| H | -1.96444110469433  | -9.15499225265875 | 2.06450920576219  |
| C | -0.62557824218622  | -0.31930271987821 | 3.31141255075880  |
| O | -0.23800228609347  | -1.52880868376618 | 3.81858742517255  |
| O | 0.58497021220626   | 0.56087026257737  | 3.01695950081646  |
| H | -1.14041104444895  | 0.23574919153743  | 4.11412819125904  |
| H | -0.04000402056859  | -2.14933796602369 | 3.07765305595823  |
| H | -10.99770793292378 | -1.82915987382566 | 1.41183319295185  |
| H | -10.64202273231612 | -1.68589965622797 | -2.63478746945885 |
| H | -10.73659279267664 | 2.52657785085492  | 1.57947037487812  |
| H | -10.44748720028352 | 2.54794253379367  | -2.49540327003538 |
| H | 10.73678110166885  | -2.27937104722912 | 1.55423797141450  |
| H | 10.40959031425942  | -2.30938191710148 | -2.52324666693851 |
| H | 10.97709211598816  | 2.00170023576327  | 1.35520909185296  |
| H | 10.56145375247457  | 1.79996535701367  | -2.72909801281698 |
| H | 2.91571731078616   | 2.03523058233786  | 3.84205359609120  |
| H | 1.14076545217843   | 0.71684378580067  | 3.81709401182877  |

• **2Si...OCH<sub>2</sub>**

|    |                   |                   |                   |
|----|-------------------|-------------------|-------------------|
| Si | -1.26425426790574 | -8.16742125791045 | -1.25745893330039 |
| Si | 1.14016801010851  | -8.21827932640861 | -1.24113908933359 |
| Si | 2.36724534082407  | -6.18805943873846 | -1.23737744530657 |
| Si | 4.74798614872244  | -6.28907526660344 | -1.22252434934720 |
| Si | 5.75672567690069  | -4.13261876240630 | -1.20083155381108 |
| Si | 8.12935403393901  | -4.09913727777547 | -1.16970940132651 |
| Si | 9.29777937748549  | -1.99913339248111 | -1.15721887778767 |
| Si | -2.44205481587098 | -6.10598575152428 | -1.26745522238787 |
| Si | 1.14673320430574  | -4.16815413513631 | -1.25309186141329 |

|    |                    |                   |                   |
|----|--------------------|-------------------|-------------------|
| Si | 4.58445656266654   | -2.07668524714608 | -1.22266265150030 |
| Si | 8.05745430555888   | 0.01742732337787  | -1.17793291311032 |
| Si | -4.81308175128092  | -6.22817357379226 | -1.28954126142610 |
| Si | -1.20873678305042  | -4.08793767566148 | -1.26782952641898 |
| Si | 2.22319037817317   | -2.07669468444317 | -1.24613980773869 |
| Si | 5.70538956607980   | -0.00243344782654 | -1.20730617679412 |
| Si | 9.27786389720469   | 2.04741014419431  | -1.15843714222037 |
| Si | 8.07418477847975   | 4.12580363582623  | -1.17400845668162 |
| Si | 4.53293104830408   | 2.04568120737117  | -1.23120393373333 |
| Si | 1.03102230563300   | -0.03650492527733 | -1.31163172255788 |
| Si | -2.28229193823941  | -1.98130688594245 | -1.28148151135476 |
| Si | -5.80924783072162  | -4.07156190544577 | -1.27796188049066 |
| Si | -4.62961449386505  | -2.02482457258441 | -1.26933249568731 |
| Si | -1.30056573070798  | 0.14312306492283  | -1.53927281143500 |
| Si | 2.18582123305212   | 2.00426979045526  | -1.25900605143307 |
| Si | 5.70330731521085   | 4.09617291747853  | -1.20666027278985 |
| Si | -8.17797231199919  | -4.07781102296602 | -1.28841797987351 |
| Si | -9.32549140456922  | -1.97618769430012 | -1.28892775492521 |
| Si | -5.72650297169191  | 0.05153376148605  | -1.27308056875853 |
| Si | -2.34022188464407  | 1.98626696847539  | -2.44170910395239 |
| Si | 1.01712770288427   | 4.03196851375047  | -1.29708325077288 |
| Si | 4.61008083268873   | 6.20556523665939  | -1.23490476331364 |
| Si | -8.08220480295837  | 0.03924684716897  | -1.27891255321726 |
| Si | -4.37034383093626  | 1.97473075491615  | -1.31940145741642 |
| Si | -1.32064217113040  | 3.76736462765897  | -1.34822749002599 |
| Si | 2.23096647619124   | 6.06185916400205  | -1.25297350901773 |
| Si | -9.37916048474390  | 2.01262789390368  | -1.28505845058125 |
| Si | -5.72884269187322  | 3.89723467163184  | -1.26708118995715 |
| Si | -2.370404444673102 | 5.87550820276457  | -1.27616084272546 |
| Si | 1.08495461264857   | 8.13185773716872  | -1.26639523332986 |
| Si | -8.09556439037700  | 4.02681685783581  | -1.27894429383575 |
| Si | -4.73238165339455  | 6.04348083734609  | -1.28342601743254 |
| Si | -1.30341894638395  | 7.99224364939064  | -1.27823835359923 |
| Si | -1.27989035621793  | -8.16491994018957 | 1.14772042050478  |
| Si | 1.12271795483846   | -8.21492996986092 | 1.16321650247877  |
| Si | 2.34627196104723   | -6.18322566963942 | 1.16827859736840  |
| Si | 4.72474828351461   | -6.28742194087840 | 1.19838971259220  |
| Si | 5.72622417858124   | -4.12844678659182 | 1.19987116808936  |
| Si | 8.09852804764301   | -4.09580493358508 | 1.23183436474426  |
| Si | 9.26609741567585   | -1.99664011030054 | 1.24740478067996  |
| Si | -2.45436731793588  | -6.10175825152257 | 1.13438384829542  |
| Si | 1.12953553356254   | -4.16326568565783 | 1.14480164630489  |
| Si | 4.55220117635166   | -2.07259761915463 | 1.17953129912642  |
| Si | 8.02380047572065   | 0.01897660937932  | 1.22947408599068  |

|    |                   |                   |                   |
|----|-------------------|-------------------|-------------------|
| Si | -4.82449092153082 | -6.22897326852325 | 1.13797175552875  |
| Si | -1.22247031173820 | -4.08386700626080 | 1.13756923206193  |
| Si | 2.19281528084433  | -2.06824422396509 | 1.15000591897278  |
| Si | 5.67114992350302  | 0.00114565313266  | 1.20535208828909  |
| Si | 9.24581339222947  | 2.04740424274659  | 1.24523225327600  |
| Si | 8.04046394849819  | 4.12410602130328  | 1.22930679474865  |
| Si | 4.49310633454769  | 2.04705409117930  | 1.17934160934347  |
| Si | 0.99642359592039  | -0.03415614734139 | 1.09672127666154  |
| Si | -2.29440448260018 | -1.97744449051721 | 1.13533532115861  |
| Si | -5.81961357811995 | -4.07286657427555 | 1.12509366199093  |
| Si | -4.63876746730547 | -2.02726362198108 | 1.12588646461120  |
| Si | -1.33325811390697 | 0.16077596139976  | 1.32909648890170  |
| Si | 2.14446148875755  | 2.00850589892163  | 1.14828104478608  |
| Si | 5.66909917510350  | 4.09486498529250  | 1.20036185447344  |
| Si | -8.18756086904517 | -4.07913572662427 | 1.11869007655138  |
| Si | -9.33636497753280 | -1.97832360062112 | 1.11669561581480  |
| Si | -5.73439048650060 | 0.05169379026951  | 1.13592643950907  |
| Si | -2.33741417839854 | 1.99181407354874  | 2.30647444792952  |
| Si | 0.99203588198523  | 4.03637856577789  | 1.10907267434386  |
| Si | 4.58007942445235  | 6.20525581884838  | 1.18650446582654  |
| Si | -8.09155113684561 | 0.03723163710419  | 1.12420495997091  |
| Si | -4.38307861542287 | 1.98278405742271  | 1.20599820856834  |
| Si | -1.34066815753998 | 3.76493990406405  | 1.17572118081635  |
| Si | 2.20437454316897  | 6.05942785688255  | 1.14730785461366  |
| Si | -9.38679814453745 | 2.01238694260969  | 1.12034030223725  |
| Si | -5.74010476769315 | 3.90748689988889  | 1.13211499238630  |
| Si | -2.38009825330533 | 5.87603030331360  | 1.12507237234520  |
| Si | 1.06995856912767  | 8.13400401595789  | 1.13752500621715  |
| Si | -8.10671974524412 | 4.02977506760631  | 1.12248234855167  |
| Si | -4.74065510765021 | 6.05336331345264  | 1.12364433439875  |
| Si | -1.31672700307895 | 7.99583387049500  | 1.12593628745226  |
| H  | 1.64795849314789  | -9.34259089375592 | 1.99944267972073  |
| H  | 1.67011865128335  | -9.35229856309008 | -2.06578583417000 |
| H  | -5.44275933804701 | -7.26960761246121 | -2.16395933594820 |
| H  | -8.86734870609827 | -5.10017278132207 | -2.14045060924869 |
| H  | -8.68896321642677 | 5.11109144738592  | -2.12669227942933 |
| H  | -5.34323929514673 | 7.06316287727526  | -2.19643516297663 |
| H  | -1.94772221333091 | 9.05007579351333  | -2.12284090942445 |
| H  | 1.61686182308010  | 9.24114028637857  | -2.12235014767472 |
| H  | 5.22586264800667  | 7.27399581617054  | -2.08693336508679 |
| H  | 8.76901765043697  | 5.16290917876373  | -2.00375862739223 |
| H  | 8.84313230987548  | -5.12499324152552 | -1.99741589077171 |
| H  | 5.39545036269724  | -7.33874947766147 | -2.07355185049981 |
| H  | 5.35483620706475  | -7.33606997579515 | 2.06360005860443  |

|   |                    |                   |                   |
|---|--------------------|-------------------|-------------------|
| H | 8.78644986820183   | -5.12170059774459 | 2.08111659899630  |
| H | 8.71032187132518   | 5.16147583836594  | 2.07903104022939  |
| H | 5.16855654256491   | 7.27998117366840  | 2.04951185573541  |
| H | 1.60289506767825   | 9.24018474584003  | 1.99646941012180  |
| H | -1.97526460481498  | 9.05367641220739  | 1.95942963685329  |
| H | -5.34651597854572  | 7.08903660257688  | 2.02192570030242  |
| H | -8.71413327685700  | 5.11289830232048  | 1.96189961507673  |
| H | -8.88047751670170  | -5.10489698083516 | 1.96371453536218  |
| H | -5.45550913522955  | -7.27463248993110 | 2.00637554582532  |
| H | -1.83077072208816  | -9.27678707228106 | -2.09156338254488 |
| H | -1.86202902721412  | -9.26926529202348 | 1.97768124966238  |
| C | 0.46873962485137   | 1.66173818961841  | 4.19940983056682  |
| O | 1.33458144214346   | 2.38951250010138  | 3.74552615403501  |
| H | 0.39156370474936   | 0.58135399279243  | 3.91673258040952  |
| H | -0.29442061417216  | 2.03271506538030  | 4.92444045978523  |
| H | -10.60873902899458 | 2.06786501697254  | 1.98638368459501  |
| H | -10.59482931641169 | 2.06721019066067  | -2.15979909789060 |
| H | -10.57799212606545 | -2.01269630244136 | 1.95631692095751  |
| H | -10.55970394453040 | -2.00600209457990 | -2.13949356235187 |
| H | 10.46930198825590  | 2.11059293709441  | 2.10920542165494  |
| H | 10.52398405105352  | 2.11137063986007  | -1.98929731023868 |
| H | 10.49283668737585  | -2.04596798711281 | 2.10792015193924  |
| H | 10.54692298997325  | -2.05199395090734 | -1.98457246117612 |

• **2Si-CHO + H<sub>2</sub>O**

|    |                   |                   |                   |
|----|-------------------|-------------------|-------------------|
| Si | 1.13981837693389  | 8.10325274459358  | -1.19634141804489 |
| Si | -1.24110193872361 | 7.90762001776959  | -1.13468408803294 |
| Si | -2.31636313768660 | 5.79679977618658  | -1.09336006043462 |
| Si | -4.67592344699354 | 5.98613506925738  | -1.14512538248598 |
| Si | -5.74712532877294 | 3.88069713003149  | -1.22638009426083 |
| Si | -8.10486724867079 | 3.93589821464422  | -1.41068885601944 |
| Si | -9.29733973449956 | 1.86933473638098  | -1.55908034905797 |
| Si | 2.42630463604659  | 6.11365293522372  | -1.20622408627235 |
| Si | -1.07309999163752 | 3.79795880268431  | -1.05348793935490 |
| Si | -4.60617391400697 | 1.82031197426832  | -1.15317879249763 |
| Si | -8.08354019744039 | -0.16683807209231 | -1.51438936843737 |
| Si | 4.78327839984127  | 6.31881458891414  | -1.40927286157120 |
| Si | 1.24735203621889  | 4.07755628114075  | -1.08852250744701 |
| Si | -2.28495682768830 | 1.79726203975356  | -0.91463510483464 |
| Si | -5.74381285937244 | -0.21423513363286 | -1.27658688295397 |
| Si | -9.33883856784537 | -2.15302128754230 | -1.74233502687197 |
| Si | -8.03852862280635 | -4.16197740279038 | -1.73692237374049 |
| Si | -4.30855585222187 | -2.10847456202911 | -1.23452251478740 |

|    |                   |                   |                   |
|----|-------------------|-------------------|-------------------|
| Si | -1.33578348058416 | -0.38152402881221 | -0.84261223007609 |
| Si | 2.36660479098635  | 2.02732870796827  | -1.05179082837607 |
| Si | 5.85597273583671  | 4.19350121717925  | -1.45686933663639 |
| Si | 4.72371076448107  | 2.10715695725295  | -1.28876100622275 |
| Si | 0.97071016258952  | 0.10242127298175  | -0.76975112684360 |
| Si | -2.23792081250678 | -1.93590926721085 | -2.39691206441032 |
| Si | -5.68234495439870 | -4.05584547372963 | -1.42818003749336 |
| Si | 8.22247820541130  | 4.11364324562252  | -1.71156527133359 |
| Si | 9.38651760414521  | 2.01189493186475  | -1.72996389682807 |
| Si | 5.83572588784245  | 0.03564332683327  | -1.32933594721645 |
| Si | 2.22647442659843  | -1.88756575639791 | -1.01656778625401 |
| Si | -1.39656735583066 | -3.69552240418698 | -1.07664725272733 |
| Si | -4.63004651633915 | -6.18437232709775 | -1.38714781810045 |
| Si | 8.17357049864954  | -0.01194375368987 | -1.54686784433475 |
| Si | 4.57421518029563  | -1.93238498053978 | -1.15992057731482 |
| Si | 0.95526179941526  | -3.85250466153484 | -0.98438175087743 |
| Si | -2.29513132772519 | -5.88265270760723 | -1.19620259529147 |
| Si | 9.32731250020528  | -2.07826297630812 | -1.59926145990943 |
| Si | 5.68493666657512  | -4.01563594040504 | -1.22305807790608 |
| Si | 2.19435057632451  | -5.85648188451961 | -1.06749690465971 |
| Si | -1.18738454323299 | -7.98014422452432 | -1.17962228664712 |
| Si | 8.04178494807273  | -4.09495736884122 | -1.46957470041268 |
| Si | 4.54632910072137  | -6.08859960766046 | -1.14747892093363 |
| Si | 1.18838431496173  | -7.99088810392903 | -1.11356125735623 |
| Si | 1.20832948773574  | 8.10960114024374  | 1.20570341072939  |
| Si | -1.20297684293605 | 7.90406102241154  | 1.26954318303510  |
| Si | -2.34606441249707 | 5.81802929048249  | 1.30261963434160  |
| Si | -4.73913904164692 | 5.95178923134709  | 1.27727759649223  |
| Si | -5.90305117094307 | 3.87486699684018  | 1.16632066112585  |
| Si | -8.26971022150821 | 3.88467775511124  | 0.98642653285032  |
| Si | -9.47875957625172 | 1.80217007474359  | 0.83669293254263  |
| Si | 2.58454378540695  | 6.17851152660511  | 1.19029023478106  |
| Si | -1.03435299842811 | 3.83415796309974  | 1.36787656983364  |
| Si | -4.78944263246222 | 1.79475926122543  | 1.25945543817442  |
| Si | -8.32921687193657 | -0.26855823880720 | 0.87690338151808  |
| Si | 4.96245393201371  | 6.38631241416619  | 1.00321317698614  |
| Si | 1.34905904206705  | 4.15169064364909  | 1.31333741837560  |
| Si | -2.43268386703597 | 1.89082876669473  | 1.47717986806852  |
| Si | -5.98585210811883 | -0.24259420872756 | 1.12362711314860  |
| Si | -9.58158802558922 | -2.27205732107226 | 0.64505518638540  |
| Si | -8.32721225668572 | -4.31567128038913 | 0.64555087139416  |
| Si | -4.75190048913186 | -2.24109048352375 | 1.15717918203379  |
| Si | -1.73295059840460 | -0.35654898243363 | 1.56973731300843  |
| Si | 2.73044693687604  | 2.23229304443168  | 1.30928463255883  |



|    |                   |                   |                   |
|----|-------------------|-------------------|-------------------|
| Si | 6.11724165208015  | 4.30151610152342  | 0.92936245837035  |
| Si | 5.04387246126647  | 2.22231137045440  | 1.09175899040993  |
| Si | 1.65001208440720  | 0.20424018028481  | 1.50030923441849  |
| Si | -2.82395575476850 | -2.23088913992835 | 2.40457061474483  |
| Si | -5.98625006520311 | -4.20700395411354 | 0.94424565495958  |
| Si | 8.47352427806406  | 4.22051860381151  | 0.67316306410536  |
| Si | 9.60661741450094  | 2.09127433185530  | 0.66218317802429  |
| Si | 6.04561165174298  | 0.08448327507675  | 1.07870187581566  |
| Si | 2.49511223061991  | -2.00832050643143 | 1.35582409457783  |
| Si | -1.42821426107970 | -3.81611512634017 | 1.37927077248442  |
| Si | -4.79789063460660 | -6.25397524470020 | 1.02424645506079  |
| Si | 8.39168945081775  | 0.05454151431660  | 0.84648411186169  |
| Si | 4.84617093288341  | -1.95570470642080 | 1.24114981704210  |
| Si | 0.97824846871344  | -3.85846928712719 | 1.42006805436454  |
| Si | -2.43571226209092 | -5.95415155507656 | 1.19294119679149  |
| Si | 9.51259249101355  | -2.03697173906893 | 0.79689029333960  |
| Si | 5.90057382831078  | -4.05145898992007 | 1.16940804841067  |
| Si | 2.24625739719318  | -5.88388502303160 | 1.33261321682896  |
| Si | -1.24627479302187 | -7.99567237873832 | 1.22391683623767  |
| Si | 8.26040395564402  | -4.09869826979854 | 0.92367196172095  |
| Si | 4.63632791154585  | -6.07420602761773 | 1.27138338653531  |
| Si | 1.15694712204222  | -7.99020036695418 | 1.29162101475070  |
| H  | -1.76537897262465 | 9.01233766578321  | 2.10956237012762  |
| H  | -1.93084052591734 | 8.95638608450089  | -1.95365201812117 |
| H  | 5.28705938631790  | 7.39565085964787  | -2.32033640105132 |
| H  | 8.83614971932266  | 5.09499058536953  | -2.66352682017852 |
| H  | 8.57504325547893  | -5.17194133352896 | -2.36469795613294 |
| H  | 5.06927141455482  | -7.18858786174715 | -2.01978251319013 |
| H  | 1.86324756385794  | -9.02586564293730 | -1.96111845777044 |
| H  | -1.79050243583185 | -9.04089776625500 | -2.04942231394137 |
| H  | -5.11497846981269 | -7.25328375649365 | -2.32019125412528 |
| H  | -8.55401777516765 | -5.17874760734138 | -2.71090307916035 |
| H  | -8.68048461229854 | 5.01728742623810  | -2.27385754813895 |
| H  | -5.22294459850554 | 7.07994250986757  | -2.01071701507170 |
| H  | -5.33452494768165 | 7.01074542452122  | 2.15575138230207  |
| H  | -9.03694393810154 | 4.88170036046776  | 1.80239831570835  |
| H  | -9.04964079838514 | -5.43052974703127 | 1.34030648145544  |
| H  | -5.39659403173029 | -7.35413083107163 | 1.85044214265505  |
| H  | -1.80658142985210 | -9.11141331686269 | 2.05471040394449  |
| H  | 1.68473848745209  | -9.09980639214555 | 2.15164552909990  |
| H  | 5.22679949900776  | -7.15990091988604 | 2.11967446778877  |
| H  | 9.03408639387944  | -5.13085289728725 | 1.68739496726293  |
| H  | 9.28464352294988  | 5.26685659503264  | 1.37511781760220  |
| H  | 5.61264162840846  | 7.49565024117698  | 1.77212275871923  |

|   |                    |                   |                   |
|---|--------------------|-------------------|-------------------|
| H | 1.62954183507134   | 9.22794215179345  | -2.05676871074494 |
| H | 1.64266786672228   | 9.28650947136193  | 2.02697848704106  |
| C | 0.64680092368705   | -0.13134949029755 | 3.03196553548313  |
| O | 0.27699058933913   | 2.09623123380820  | 4.14380133687599  |
| O | -0.58341542181104  | -0.50305046320931 | 2.98603085143704  |
| H | 1.11551050690719   | -0.23961305583800 | 4.02445195388131  |
| H | 0.73785755057743   | 2.63151864641603  | 3.46365351926406  |
| H | 10.92099997622702  | 2.17815272265894  | 1.37756626891544  |
| H | 10.55230583834381  | 2.02903611023059  | -2.67150989131404 |
| H | 10.80791330421494  | -2.14917740488632 | 1.54281845864730  |
| H | 10.49311642715456  | -2.19379248457470 | -2.53336353590957 |
| H | -10.77219855408658 | 1.89580225818149  | 1.58928360243019  |
| H | -10.46671638170752 | 1.93656432721221  | -2.49407375496721 |
| H | -10.88743616631891 | -2.38156078913791 | 1.37280618594549  |
| H | -10.48200626107993 | -2.16280707633407 | -2.71094516112549 |
| H | -2.90569055145901  | -2.23931838204987 | 3.89768717995508  |
| H | -0.65592540087009  | 2.16360282102392  | 3.85810743142970  |

• **2Si-CHO**

|    |                   |                   |                   |
|----|-------------------|-------------------|-------------------|
| Si | 1.13532143477792  | 8.09174814786017  | -1.14935284543564 |
| Si | -1.24817186985836 | 7.92816041158375  | -1.11198965840011 |
| Si | -2.33462826155859 | 5.82176426634705  | -1.10064348407158 |
| Si | -4.69454111830487 | 6.02109076248517  | -1.18305873212804 |
| Si | -5.78941882116500 | 3.92294628845814  | -1.26349174957082 |
| Si | -8.14844569891032 | 3.93985266087661  | -1.46973259892326 |
| Si | -9.30589493257908 | 1.84733421849547  | -1.58941197977473 |
| Si | 2.40243889844613  | 6.09052764327634  | -1.17051169095256 |
| Si | -1.09819250635124 | 3.81962676918561  | -1.05198330234167 |
| Si | -4.65659419573518 | 1.85121722544728  | -1.18786228963937 |
| Si | -8.08733889205291 | -0.18488903464931 | -1.51572118431396 |
| Si | 4.75864975137846  | 6.30540665595360  | -1.34453906601871 |
| Si | 1.22666334856310  | 4.05305248339566  | -1.07098105927304 |
| Si | -2.32563106181538 | 1.82732783958098  | -0.99086847429273 |
| Si | -5.74669564330866 | -0.21493157243978 | -1.27954294811485 |
| Si | -9.33852092703894 | -2.17825414449449 | -1.69913789341549 |
| Si | -8.01437284373997 | -4.16989768648702 | -1.66697846034327 |
| Si | -4.28725763787582 | -2.08850876595625 | -1.21842173619315 |
| Si | -1.31495252348953 | -0.32040106770421 | -0.87318796431020 |
| Si | 2.37115364447544  | 2.01654031562804  | -1.09395419270565 |
| Si | 5.84140662311398  | 4.18567186340943  | -1.40659310478079 |
| Si | 4.72638259519823  | 2.08795696687937  | -1.28115631136315 |
| Si | 1.00608482358368  | 0.07294597024339  | -0.85243673928584 |
| Si | -2.21981559642845 | -1.92241760735779 | -2.38071280847604 |

|    |                   |                   |                   |
|----|-------------------|-------------------|-------------------|
| Si | -5.65757031034331 | -4.03853048628186 | -1.38004216841572 |
| Si | 8.20711214513857  | 4.11001060837509  | -1.66115523272226 |
| Si | 9.37659940534727  | 2.01152904661851  | -1.70166156058895 |
| Si | 5.83351856182383  | 0.01218762642863  | -1.33403242557237 |
| Si | 2.25441643421408  | -1.92862774829987 | -1.05514495196332 |
| Si | -1.36977722576058 | -3.69006717655546 | -1.07591866982669 |
| Si | -4.62046179382529 | -6.17167466180620 | -1.34243090060099 |
| Si | 8.17377781758769  | -0.02087618638684 | -1.54497250443721 |
| Si | 4.60212205199998  | -1.98145725954809 | -1.18967894693719 |
| Si | 0.98070423703409  | -3.89313331397673 | -1.00122136683635 |
| Si | -2.28312204656252 | -5.87412032331136 | -1.18373183946324 |
| Si | 9.33393172551355  | -2.08357730078454 | -1.61500670334598 |
| Si | 5.71171448511477  | -4.06672422986315 | -1.25519236991932 |
| Si | 2.21328326524871  | -5.90272052198197 | -1.09280596131929 |
| Si | -1.19208578780517 | -7.97973661345013 | -1.17860968354207 |
| Si | 8.07021985935351  | -4.11729033366098 | -1.50175698532129 |
| Si | 4.56586834685930  | -6.13843450895906 | -1.18660977334331 |
| Si | 1.18439129332874  | -8.02689730489703 | -1.13121309288478 |
| Si | 1.18475452912877  | 8.06788033518253  | 1.25309264288709  |
| Si | -1.22945951500591 | 7.89982821734495  | 1.29178398651689  |
| Si | -2.38828949034118 | 5.82402760877722  | 1.29576302767416  |
| Si | -4.78027772125209 | 5.99838297016058  | 1.23998253305912  |
| Si | -5.97313136291407 | 3.93902341327574  | 1.12803039284547  |
| Si | -8.33548360417146 | 3.92190914157930  | 0.92617862912750  |
| Si | -9.49681276443074 | 1.81139762261551  | 0.80743956919434  |
| Si | 2.53487875966115  | 6.11739055537623  | 1.22741728082742  |
| Si | -1.08197954479491 | 3.83010122331272  | 1.37449287953840  |
| Si | -4.86594095408112 | 1.86284591315926  | 1.21913875215950  |
| Si | -8.31937651425813 | -0.24650192725838 | 0.87681763684654  |
| Si | 4.91453627608768  | 6.34335271927194  | 1.06953087414641  |
| Si | 1.30320223378871  | 4.08120498587662  | 1.34277429992951  |
| Si | -2.52285639056988 | 1.93432844368009  | 1.39380642285616  |
| Si | -5.97437406343006 | -0.21837188798119 | 1.11918175710522  |
| Si | -9.55888433351633 | -2.25975522829330 | 0.69193087126472  |
| Si | -8.27863872657387 | -4.28761960617022 | 0.72048894317331  |
| Si | -4.69499702210687 | -2.19488802435632 | 1.18289816532393  |
| Si | -1.73654604270453 | -0.26462098511182 | 1.53986875983371  |
| Si | 2.72749044976738  | 2.19885715163225  | 1.27612157516647  |
| Si | 6.09770044251130  | 4.27325052342297  | 0.98100894691247  |
| Si | 5.04570701395083  | 2.18262597398792  | 1.10720869934898  |
| Si | 1.68724050495854  | 0.13278455893748  | 1.40876938460274  |
| Si | -2.73333600972774 | -2.18165152291617 | 2.40242343761802  |
| Si | -5.93387134843534 | -4.16657432760078 | 0.99681023628931  |
| Si | 8.45461147677862  | 4.19652453006997  | 0.72421781116688  |

|    |                   |                   |                   |
|----|-------------------|-------------------|-------------------|
| Si | 9.58954080505960  | 2.06736572094013  | 0.69217175614996  |
| Si | 6.03928250887576  | 0.04249762010685  | 1.07361468759685  |
| Si | 2.53356072219443  | -2.06924045662393 | 1.32167503466425  |
| Si | -1.38111476420448 | -3.80689570094577 | 1.37992528095980  |
| Si | -4.76623603319306 | -6.22598938882870 | 1.06981936443676  |
| Si | 8.38556740035834  | 0.02222908237156  | 0.84813889177745  |
| Si | 4.87907056780955  | -2.02073527113215 | 1.21203580621837  |
| Si | 1.01758542949544  | -3.90601972287206 | 1.40313429929852  |
| Si | -2.40310551688909 | -5.93870933902690 | 1.20622182497361  |
| Si | 9.52220446021673  | -2.06112659049505 | 0.78089359697208  |
| Si | 5.93330149227497  | -4.11426291721293 | 1.13738696447212  |
| Si | 2.27827599896783  | -5.93436380747226 | 1.30631308798171  |
| Si | -1.23512987037167 | -7.99399028481515 | 1.22576831293544  |
| Si | 8.29322404502974  | -4.13724892794177 | 0.89047618426544  |
| Si | 4.66678083341855  | -6.13559455854075 | 1.23194134375970  |
| Si | 1.16771969781663  | -8.02783625636842 | 1.27368311826689  |
| H  | -1.78283317335568 | 9.00549433363830  | 2.14120361658972  |
| H  | -1.91856581943992 | 8.98970029690161  | -1.93057313866249 |
| H  | 5.27204450380383  | 7.39053712164596  | -2.24018018153958 |
| H  | 8.81640056995627  | 5.10199526022519  | -2.60477715041888 |
| H  | 8.61850748258332  | -5.17912744122661 | -2.40581674235471 |
| H  | 5.08491961743863  | -7.23675155007185 | -2.06329010787110 |
| H  | 1.83725477055185  | -9.07121527710507 | -1.98437285929728 |
| H  | -1.81476741301520 | -9.03417654592005 | -2.04238382677747 |
| H  | -5.12194191537089 | -7.23945210466728 | -2.26795098177976 |
| H  | -8.51931268456426 | -5.21447409159757 | -2.61673320079599 |
| H  | -8.74634845820478 | 4.98931894186319  | -2.35697530735408 |
| H  | -5.22178688879327 | 7.12042685555345  | -2.05407877025066 |
| H  | -5.37255903870226 | 7.07376836160104  | 2.10052402032929  |
| H  | -9.12284243215322 | 4.92190402414434  | 1.71853518732038  |
| H  | -8.98785225945337 | -5.39665408835183 | 1.43826555295256  |
| H  | -5.36051535527684 | -7.31649389231765 | 1.91184283221522  |
| H  | -1.80529546520988 | -9.10233011708177 | 2.05992509703578  |
| H  | 1.68956958340671  | -9.14249688087375 | 2.13054340028598  |
| H  | 5.25793008001015  | -7.22891810428549 | 2.06979648124638  |
| H  | 9.07429505969958  | -5.17118995390795 | 1.64393602644113  |
| H  | 9.26701208651127  | 5.23526191442558  | 1.43594619400276  |
| H  | 5.55282846765544  | 7.44665716980182  | 1.85713967072231  |
| H  | 1.65054456771805  | 9.21822754976902  | -1.99247094945799 |
| H  | 1.62781005000480  | 9.23016704969758  | 2.09075558573447  |
| C  | 0.66350854778920  | 0.02289981972437  | 2.94461611066255  |
| O  | -0.60727543748421 | -0.16707429307825 | 2.98073795603051  |
| H  | 1.13136227167591  | 0.07867731064013  | 3.94803745335112  |
| H  | 10.90291481343744 | 2.14793144109599  | 1.41036176479146  |

|   |                    |                   |                   |
|---|--------------------|-------------------|-------------------|
| H | 10.54538645336837  | 2.04571245745227  | -2.63914054884271 |
| H | 10.82055000176038  | -2.16498346790472 | 1.52280860790928  |
| H | 10.50048343036330  | -2.18590369010506 | -2.54987862578332 |
| H | -10.79767516792750 | 1.88763969267721  | 1.54950060784022  |
| H | -10.47769946408556 | 1.89478174895944  | -2.52300311169748 |
| H | -10.85470005570428 | -2.37265093109670 | 1.43691536934137  |
| H | -10.48623906114788 | -2.21543530801624 | -2.66164755766742 |
| H | -2.80387737661537  | -2.17491511300263 | 3.89645986677011  |

• **2Si...HCOOH**

|    |                   |                   |                   |
|----|-------------------|-------------------|-------------------|
| Si | -1.13483856242082 | -8.28314052301458 | -1.42587738260673 |
| Si | 1.27029593973921  | -8.26400968451321 | -1.41549594519080 |
| Si | 2.44995020625776  | -6.20518031935437 | -1.38814484866387 |
| Si | 4.82932779120508  | -6.29903522125097 | -1.38546580135203 |
| Si | 5.83219868446337  | -4.13950540631711 | -1.35169403752857 |
| Si | 8.20396028605688  | -4.08510105825502 | -1.33828739771326 |
| Si | 9.33294194463776  | -1.96556718188723 | -1.31223258984222 |
| Si | -2.34976565603587 | -6.24468914729425 | -1.40874842811593 |
| Si | 1.21339075444016  | -4.19327160368390 | -1.36957025152907 |
| Si | 4.64573627008663  | -2.09516446106480 | -1.33211451517441 |
| Si | 8.06492623317758  | 0.03528384444436  | -1.29967554498041 |
| Si | -4.72743142044430 | -6.38126401028490 | -1.42675206589299 |
| Si | -1.15010444171691 | -4.21057408204090 | -1.38394397651924 |
| Si | 2.28746436241851  | -2.09245540343063 | -1.35046524337875 |
| Si | 5.71291608274836  | 0.01251169529627  | -1.31614496937730 |
| Si | 9.28845833821921  | 2.06354160332048  | -1.27090991063320 |
| Si | 8.11824148145098  | 4.16120026942609  | -1.25150236566198 |
| Si | 4.60620833963786  | 2.10077786134397  | -1.29527227262696 |
| Si | 1.16373320121979  | -0.02505395159263 | -1.32892696687906 |
| Si | -2.28338760666730 | -2.14088469642608 | -1.36251866826988 |
| Si | -5.78194890182666 | -4.24591844737806 | -1.39663615986904 |
| Si | -4.64083135681388 | -2.17580082038650 | -1.37066041560724 |
| Si | -1.18718617718709 | -0.05028915135864 | -1.36432953523100 |
| Si | 2.24775711056405  | 2.06502269376379  | -1.33352332006826 |
| Si | 5.74571235870904  | 4.17211351108825  | -1.26524587937677 |
| Si | -8.15452852158840 | -4.24170489616647 | -1.40118974200851 |
| Si | -9.33321030902496 | -2.14872731192326 | -1.38003427357070 |
| Si | -5.76093401861957 | -0.09513076396460 | -1.35008188968105 |
| Si | -2.32810286533382 | 2.01535558511478  | -1.30926262336516 |
| Si | 1.12328422403030  | 4.14007419197041  | -1.27987512482754 |
| Si | 4.69940537399747  | 6.31217240720614  | -1.25049768524832 |
| Si | -8.11299867756604 | -0.11850075479527 | -1.35265289530846 |
| Si | -4.68586346368703 | 2.00821968579077  | -1.31664975298471 |

|    |                   |                   |                   |
|----|-------------------|-------------------|-------------------|
| Si | -1.23971378008094 | 4.10816757348068  | -1.28247772787479 |
| Si | 2.32154455839835  | 6.17559513099037  | -1.24936739960914 |
| Si | -9.37728309459951 | 1.88480321318364  | -1.32858156881346 |
| Si | -5.87218706998052 | 4.05313091010360  | -1.28997602802032 |
| Si | -2.48303154080055 | 6.11644313402695  | -1.25414946659825 |
| Si | 1.09666217461298  | 8.20841082774915  | -1.22426571237525 |
| Si | -8.24375983491661 | 4.00189555959458  | -1.29679697228182 |
| Si | -4.86227261163701 | 6.20938857880318  | -1.26678280291351 |
| Si | -1.30839927069469 | 8.17790498638736  | -1.22819851479053 |
| Si | -1.14405208075469 | -8.30867428675664 | 0.97794967775411  |
| Si | 1.26057382266127  | -8.28936135381575 | 0.98790289107980  |
| Si | 2.43963302160674  | -6.22992728553338 | 1.01492731148812  |
| Si | 4.81874588006772  | -6.32378508853363 | 1.03380236990072  |
| Si | 5.82066861893377  | -4.16336441871531 | 1.05231537452313  |
| Si | 8.19236937554955  | -4.10991610859400 | 1.06339320275082  |
| Si | 9.32124296359195  | -1.99069342727190 | 1.09180702216697  |
| Si | -2.35863204959775 | -6.27019307250774 | 0.99431325621376  |
| Si | 1.20410251082362  | -4.21744475256197 | 1.03721892197160  |
| Si | 4.63397499532585  | -2.11905897719167 | 1.07142552927082  |
| Si | 8.05327576474177  | 0.01020026441601  | 1.10739207934389  |
| Si | -4.73591917120844 | -6.40976644344547 | 0.99273683943978  |
| Si | -1.15842583818210 | -4.23654750995980 | 1.02377240149538  |
| Si | 2.27647140670859  | -2.11666306705532 | 1.05198089782120  |
| Si | 5.70147866484485  | -0.01244649306822 | 1.10053106473348  |
| Si | 9.27895240724151  | 2.03707338271526  | 1.13314089920939  |
| Si | 8.10719860696239  | 4.13326125052464  | 1.14989214861058  |
| Si | 4.59438720392549  | 2.07330207959489  | 1.10908165864616  |
| Si | 1.15366108676441  | -0.05288202255844 | 1.09941887242752  |
| Si | -2.28995683651479 | -2.16797441274270 | 1.03824008458982  |
| Si | -5.78837401903678 | -4.27374682519812 | 1.00710396056710  |
| Si | -4.64649910561749 | -2.20464937581149 | 1.03337890886412  |
| Si | -1.19318997161655 | -0.08147897233912 | 1.03171556223695  |
| Si | 2.23899570784163  | 2.03451879447173  | 1.05915514650480  |
| Si | 5.73482111996300  | 4.14262279710670  | 1.13827475090700  |
| Si | -8.16071867458826 | -4.26980450997135 | 1.00050513591271  |
| Si | -9.34073529845594 | -2.17818132936739 | 1.02392165920538  |
| Si | -5.76772008499727 | -0.12558124289398 | 1.06453637729701  |
| Si | -2.33618239549257 | 1.98463520620972  | 1.08864828996764  |
| Si | 1.12124535641955  | 4.11300403691848  | 1.12465596500103  |
| Si | 4.69355019357778  | 6.28371426488358  | 1.16905784751071  |
| Si | -8.11982586638037 | -0.14831966474520 | 1.05464331708271  |
| Si | -4.69290006914718 | 1.97812579339019  | 1.08783178443173  |
| Si | -1.24438420922953 | 4.07911785622992  | 1.12447348923214  |
| Si | 2.31666660147067  | 6.14768162511257  | 1.15384519374679  |

|    |                    |                   |                   |
|----|--------------------|-------------------|-------------------|
| Si | -9.38468603862398  | 1.85443974334530  | 1.07539680555796  |
| Si | -5.87899370887186  | 4.02235296230397  | 1.11360655097215  |
| Si | -2.48770483552389  | 6.08721155570939  | 1.14850085824041  |
| Si | 1.09173297435635   | 8.17940329960683  | 1.17875876755706  |
| Si | -8.25116567968627  | 3.97160256821324  | 1.10510982915375  |
| Si | -4.86776735976234  | 6.17781276754576  | 1.15250313173895  |
| Si | -1.31295311029691  | 8.14952324797293  | 1.17578947955436  |
| H  | 1.81912095631549   | -9.41312263269846 | 1.80809974496450  |
| H  | 1.83551735241491   | -9.36970177445954 | -2.25527587520641 |
| H  | -5.34687835294039  | -7.43018770698548 | -2.29946241563989 |
| H  | -8.84891971627063  | -5.26000461445334 | -2.25439395563477 |
| H  | -8.95681986385371  | 5.02731392034728  | -2.12569906303769 |
| H  | -5.50035866311416  | 7.26906658397939  | -2.11259445123245 |
| H  | -1.87386628240809  | 9.30065973805404  | -2.04491141055269 |
| H  | 1.63509858449901   | 9.34628510441923  | -2.03825862949267 |
| H  | 5.32486800101652   | 7.38298134212339  | -2.09179380038520 |
| H  | 8.82260109094855   | 5.19644968535342  | -2.07566880619935 |
| H  | 8.92559420101327   | -5.08973702579880 | -2.18504456674535 |
| H  | 5.47610792224518   | -7.33789174245763 | -2.25040227457079 |
| H  | 5.45792416508560   | -7.37949922749030 | 1.88394803457720  |
| H  | 8.90520957885317   | -5.13210348697225 | 1.89657987862071  |
| H  | 8.79869099313745   | 5.15173001364332  | 2.00534528373585  |
| H  | 5.31573853500503   | 7.33229762128026  | 2.04043193355708  |
| H  | 1.63108982218430   | 9.29415215453889  | 2.02372518349594  |
| H  | -1.88049559400031  | 9.25171769873693  | 2.01882749870231  |
| H  | -5.50957319259362  | 7.21474295894482  | 2.02349746751762  |
| H  | -8.96839627424087  | 4.97618407653210  | 1.95568200549809  |
| H  | -8.85719963184530  | -5.30937842759483 | 1.82597266860679  |
| H  | -5.36011206933966  | -7.47931084477818 | 1.83662530943629  |
| H  | -1.67579655859892  | -9.39791300665839 | -2.26977978843005 |
| H  | -1.69228417604506  | -9.44092135941539 | 1.79350726368046  |
| C  | 0.35873440963048   | 1.21688213045632  | 4.08020872952301  |
| O  | 0.06555510620435   | 1.60157304709049  | 5.32737276672723  |
| O  | 0.91298693117787   | 0.17012346360962  | 3.79661177048769  |
| H  | 0.02913634447535   | 1.98059503791605  | 3.34348019504647  |
| H  | 0.37813067063107   | 0.89176764292630  | 5.93149171825787  |
| H  | -10.58125147786442 | -2.24475860805385 | 1.86305522591577  |
| H  | -10.56859525585690 | -2.19433811128145 | -2.22807003273195 |
| H  | -10.62611373061358 | 1.87351200179822  | 1.91564179639806  |
| H  | -10.61370299996030 | 1.92685321872812  | -2.17527719684851 |
| H  | 10.55585991928498  | -2.02582565480228 | 1.94164009621167  |
| H  | 10.57588584221650  | -1.98469108871477 | -2.15025528614697 |
| H  | 10.51333164372481  | 2.08057220383536  | 1.98296824160952  |
| H  | 10.52995835525979  | 2.12623944596745  | -2.10892490203444 |

- **2Si-OCH<sub>2</sub>**

|    |                   |                   |                   |
|----|-------------------|-------------------|-------------------|
| Si | 1.10991782274239  | 7.96852507213627  | -1.11549881738392 |
| Si | -1.27520229709081 | 8.07202392806529  | -1.16314463192616 |
| Si | -2.49094654880064 | 6.03646425617818  | -1.16422033368139 |
| Si | -4.84773318904571 | 6.22340637490015  | -1.38109337446566 |
| Si | -5.89984145525699 | 4.09130663006567  | -1.45624734596858 |
| Si | -8.25857987464356 | 3.94447127547842  | -1.71552507360169 |
| Si | -9.32881023407670 | 1.79581422403531  | -1.71998588397650 |
| Si | 2.25877125571359  | 5.89721534970125  | -1.07585596129668 |
| Si | -1.24670399722331 | 4.04485550319953  | -1.02001584440395 |
| Si | -4.72874594786029 | 2.02569589844493  | -1.28372382284278 |
| Si | -8.07080999391554 | -0.20154866330577 | -1.54094882389513 |
| Si | 4.60894088613130  | 6.13627581454106  | -1.17239258839809 |
| Si | 1.07167452639716  | 3.87413288040942  | -0.98728620160032 |
| Si | -2.38308509736869 | 2.01162501713494  | -1.04716750606545 |
| Si | -5.73405939391003 | -0.09211060992998 | -1.32654940554318 |
| Si | -9.25954842151104 | -2.24178840139426 | -1.59347908227858 |
| Si | -7.91392442875419 | -4.21123131888275 | -1.47056591650213 |
| Si | -4.36850503748153 | -2.00669229738677 | -1.23362600917305 |
| Si | -1.09983947787124 | 0.05560011255583  | -0.60575504110900 |
| Si | 2.26486123636786  | 1.88043820064994  | -0.85723572684189 |
| Si | 5.69137995852324  | 4.03383027194086  | -1.25171862265188 |
| Si | 4.58599157654801  | 1.94706770989839  | -1.12272622367556 |
| Si | 1.23992949407235  | -0.23902184050429 | -0.61379369850039 |
| Si | -2.08873269816660 | -1.81466379711758 | -1.56459132163351 |
| Si | -5.55655130051371 | -4.04596593334297 | -1.29329966129751 |
| Si | 8.04187754636711  | 4.07553100685957  | -1.53035621523843 |
| Si | 9.23104510681243  | 2.00554643525678  | -1.66893910876233 |
| Si | 5.70805121709563  | -0.09488269546695 | -1.25436324829869 |
| Si | 2.13998969970913  | -1.77869062891513 | -2.19918412719978 |
| Si | -0.98340531719064 | -3.74429485452878 | -1.04305444534802 |
| Si | -4.42505333232929 | -6.10986793374455 | -1.15646475538340 |
| Si | 8.03718380341168  | -0.03843853100987 | -1.56193982194284 |
| Si | 4.27717551358142  | -1.98566530973902 | -1.15793154580647 |
| Si | 1.36471250796235  | -3.63197980209827 | -1.00053822678846 |
| Si | -2.09160506833007 | -5.80647141518863 | -1.10076758136033 |
| Si | 9.30739295260373  | -2.01443204985363 | -1.78182302128105 |
| Si | 5.66289859486514  | -3.91966698866173 | -1.37329066221684 |
| Si | 2.30689809789462  | -5.79713208582518 | -1.12251924381209 |
| Si | -1.07635443712137 | -7.93536246093117 | -1.04934166105527 |
| Si | 8.01374466373805  | -4.02391375419511 | -1.72897837940258 |
| Si | 4.64467404687660  | -6.05629410430276 | -1.29369725334452 |
| Si | 1.29082604182199  | -7.93100609644323 | -1.09694821864736 |



|    |                   |                   |                   |
|----|-------------------|-------------------|-------------------|
| Si | 1.08973508755828  | 7.95813272781779  | 1.28794467845257  |
| Si | -1.33284827920609 | 8.06986649763332  | 1.23807592111212  |
| Si | -2.64098044955666 | 6.09096241215183  | 1.22958411946615  |
| Si | -5.02334526461394 | 6.27897681553385  | 1.03700054368907  |
| Si | -6.17700263637727 | 4.19479170827400  | 0.93876252167335  |
| Si | -8.52328254933249 | 4.06037440771846  | 0.66891353321986  |
| Si | -9.53854181055771 | 1.87670112224519  | 0.67661175506179  |
| Si | 2.31520466768358  | 5.91562849535274  | 1.31923845355666  |
| Si | -1.34071177147061 | 4.09806385376364  | 1.39853829652661  |
| Si | -5.07108882205188 | 2.13735427481108  | 1.08860055432950  |
| Si | -8.26965037390952 | -0.13258035549071 | 0.85346215055215  |
| Si | 4.70941295094224  | 6.12784326782574  | 1.24884475871091  |
| Si | 1.05775105607677  | 3.88838340519002  | 1.44795962261332  |
| Si | -2.76815859838655 | 2.22535142410683  | 1.29210062199570  |
| Si | -5.91846766499665 | -0.05309625637564 | 1.06678752997105  |
| Si | -9.42670271090849 | -2.19311713169398 | 0.80389527330413  |
| Si | -8.07148802473449 | -4.17435622726444 | 0.92664776078926  |
| Si | -4.52893763716407 | -1.98475247365227 | 1.21340149388465  |
| Si | -1.73266448235759 | 0.20942851322893  | 1.74671717832106  |
| Si | 2.51412699389959  | 2.00318433322940  | 1.52684067109628  |
| Si | 5.93098701973754  | 4.08024292368126  | 1.13542746998689  |
| Si | 4.85084730190236  | 1.99326315790607  | 1.27373542236393  |
| Si | 1.73551526976260  | -0.19548088472796 | 1.76883148520136  |
| Si | -2.46494636355426 | -1.94531003966507 | 2.32182620354523  |
| Si | -5.70947554782623 | -4.01087620127611 | 1.09731925944918  |
| Si | 8.28739110065855  | 4.07977038366430  | 0.86052290920425  |
| Si | 9.47306370821427  | 1.97948312942103  | 0.72427350177491  |
| Si | 5.98830138727207  | -0.07781464088234 | 1.13557243880553  |
| Si | 2.82308381543489  | -2.12358191251288 | 2.44882960727720  |
| Si | -1.02066197725381 | -3.61478011691930 | 1.43568706740219  |
| Si | -4.47497416171239 | -6.02497852908765 | 1.25316315906507  |
| Si | 8.32802699894351  | -0.09632961700684 | 0.82612737607998  |
| Si | 4.76591107655074  | -2.09069246855017 | 1.22568801724716  |
| Si | 1.38310291369939  | -3.69090759360866 | 1.43875184247921  |
| Si | -2.10540765228779 | -5.73282745076009 | 1.29705899100587  |
| Si | 9.58646358293607  | -2.09747148074803 | 0.60268051185669  |
| Si | 6.01124753213256  | -4.04556875494318 | 0.99522819366139  |
| Si | 2.43359867162608  | -5.81916712378415 | 1.26467644053976  |
| Si | -1.04205217064509 | -7.85180179844929 | 1.35185753095931  |
| Si | 8.34690558718326  | -4.15214818699559 | 0.64785204719619  |
| Si | 4.80824743177592  | -6.07753868738951 | 1.12046795862083  |
| Si | 1.34845780690292  | -7.91140681503660 | 1.30820564394195  |
| H  | -1.79666851629384 | 9.23353159533661  | 2.06295557373472  |
| H  | -1.82210586906184 | 9.16995052234344  | -2.02409349537870 |

|   |                    |                   |                   |
|---|--------------------|-------------------|-------------------|
| H | 5.12436130049552   | 7.22979559319462  | -2.05757555056374 |
| H | 8.59373741012143   | 5.13070164426141  | -2.44049354354743 |
| H | 8.49788066411407   | -5.05703277027915 | -2.70180188795147 |
| H | 5.13592885009776   | -7.13633606263517 | -2.21065253781050 |
| H | 1.91777923404360   | -8.97144266181262 | -1.97319628846185 |
| H | -1.77100192160898  | -8.98170688988790 | -1.86584692900918 |
| H | -4.90813098030113  | -7.23298516327063 | -2.02185804739122 |
| H | -8.41499798817748  | -5.33172481147620 | -2.32992440347987 |
| H | -8.90674663254769  | 4.88282731976393  | -2.68715774597053 |
| H | -5.35259626379588  | 7.30419695264263  | -2.28726684694857 |
| H | -5.70856466703041  | 7.36904364711884  | 1.80391012872822  |
| H | -9.38329374719593  | 5.06685239071358  | 1.36994475992676  |
| H | -8.71998091775983  | -5.25184744289080 | 1.74194319122540  |
| H | -5.02015177371692  | -7.07363490567080 | 2.17478496496360  |
| H | -1.64896864817531  | -8.88290430882773 | 2.25536407997828  |
| H | 1.90155437374878   | -9.00329470440532 | 2.17385506731882  |
| H | 5.38998931956414   | -7.16791089954545 | 1.97203143907002  |
| H | 9.09153323729720   | -5.25515056354254 | 1.33831592439390  |
| H | 9.10183707400668   | 5.08511651092248  | 1.61865359358328  |
| H | 5.29788217442665   | 7.21608941858061  | 2.09606296377108  |
| H | 1.76347021177915   | 9.03561834997356  | -1.94065918737295 |
| H | 1.60040524917278   | 9.09509494922802  | 2.12372056066206  |
| C | 0.44062856897370   | -0.17698109437859 | 3.19196293862282  |
| O | -0.61469783071554  | 0.73315968308551  | 2.90438238868599  |
| H | 0.97448813441135   | 0.17495823096855  | 4.09512430505088  |
| H | 10.79021768214195  | 2.08212240526225  | 1.43419896105795  |
| H | 10.38285899106182  | 2.06117543472509  | -2.62663084025323 |
| H | 10.90167115484590  | -2.20111927367979 | 1.31455330308488  |
| H | 10.43197258196997  | -2.03309667787377 | -2.77167979098101 |
| H | -10.85524940069511 | 1.89569445928194  | 1.39332313817457  |
| H | -10.50416373250490 | 1.76838615149337  | -2.64990834048516 |
| H | -10.69892443708173 | -2.33476225973778 | 1.58257600827709  |
| H | -10.41548846445033 | -2.35885686280029 | -2.53858663824511 |
| H | -2.65627708078432  | -2.12522619530295 | 3.79608055879679  |
| H | 2.90179469371344   | -2.26123047504705 | 3.93816770977762  |
| H | 0.04646295314789   | -1.19415873125029 | 3.41804543357691  |

• **2Si-OCH<sub>2</sub>\***

|    |                   |                  |                   |
|----|-------------------|------------------|-------------------|
| Si | 1.34658187770091  | 8.04416472786606 | -1.12928421779304 |
| Si | -1.04152462937140 | 8.03810103969466 | -1.08494507359068 |
| Si | -2.24138203876828 | 5.99563568423194 | -1.04064802089733 |
| Si | -4.59128563936474 | 6.24260030645753 | -1.14944000392027 |
| Si | -5.67036873088145 | 4.13581920384521 | -1.24143328750310 |

|    |                   |                   |                   |
|----|-------------------|-------------------|-------------------|
| Si | -8.02784158463803 | 4.16389830766969  | -1.48181657033791 |
| Si | -9.23270896543284 | 2.10142318930859  | -1.62186165703689 |
| Si | 2.52081098406989  | 5.98378851568268  | -1.14458153646712 |
| Si | -1.05782869216334 | 3.96408637022622  | -0.97380701441491 |
| Si | -4.57845977655340 | 2.04034529030467  | -1.14072402369072 |
| Si | -8.05748840837321 | 0.04363115273676  | -1.55458707056229 |
| Si | 4.88149592506179  | 6.11514619072695  | -1.34935959603869 |
| Si | 1.26442931326533  | 4.00337813801792  | -1.02357521417660 |
| Si | -2.25452976591329 | 1.96208212670704  | -0.89299994193440 |
| Si | -5.72349937173521 | 0.00843313312410  | -1.29692183494283 |
| Si | -9.31707707617549 | -1.94137545204412 | -1.76189384552953 |
| Si | -8.08143960093478 | -3.99225531281306 | -1.73499007457688 |
| Si | -4.44547658826799 | -1.97387903324820 | -1.25530483742830 |
| Si | -1.14063121136566 | -0.08966426430512 | -0.62023005873842 |
| Si | 2.38586773318286  | 1.96806526467182  | -0.96684773806894 |
| Si | 5.90121712527636  | 3.96933463462623  | -1.40180690467938 |
| Si | 4.72717240682830  | 1.90626936955364  | -1.22312347029612 |
| Si | 1.20312722512252  | -0.06227490501326 | -0.63130699928459 |
| Si | -2.16997254723307 | -1.84077054099400 | -1.76801123104515 |
| Si | -5.72193283724732 | -3.96448110838813 | -1.44126310474626 |
| Si | 8.25148734064661  | 3.82555669116400  | -1.71237078312578 |
| Si | 9.29356809796537  | 1.66687009979640  | -1.73529561619300 |
| Si | 5.68300756444119  | -0.23195391285653 | -1.25581621945595 |
| Si | 2.03343246600098  | -1.77888386917925 | -2.05219804232743 |
| Si | -1.19435896234186 | -3.79056821895887 | -1.04966461789045 |
| Si | -4.63823755098149 | -6.06921441236136 | -1.34594042483070 |
| Si | 8.01608418370535  | -0.31380834465787 | -1.53130113820608 |
| Si | 4.18106842577504  | -2.05131098925243 | -1.09651886085390 |
| Si | 1.13913853396797  | -3.64538440808291 | -0.95982399468963 |
| Si | -2.29579854815847 | -5.85659706818510 | -1.18248580254813 |
| Si | 9.22972295581065  | -2.33694934730838 | -1.62049886425295 |
| Si | 5.49505329795140  | -4.03120220974393 | -1.21274624872583 |
| Si | 2.10730701999206  | -5.79371412047194 | -1.04209699725976 |
| Si | -1.27609971390860 | -7.98713073132635 | -1.10709846739520 |
| Si | 7.84013360670466  | -4.26977881967126 | -1.48695727338894 |
| Si | 4.43470970276509  | -6.13491831625656 | -1.10611018856930 |
| Si | 1.09069744055532  | -7.92349211532467 | -1.05326390528087 |
| Si | 1.40389482174576  | 8.02796173891397  | 1.27184697814781  |
| Si | -1.02114423150857 | 8.03073722247247  | 1.31867608993173  |
| Si | -2.30658621815896 | 6.02829528251292  | 1.35458156345498  |
| Si | -4.69501637184095 | 6.22648871554600  | 1.27274451053872  |
| Si | -5.88688993167556 | 4.15870714257722  | 1.15566112055720  |
| Si | -8.24791221841411 | 4.15192903295737  | 0.91102620679175  |
| Si | -9.43719076389311 | 2.05572031237406  | 0.77478923089973  |

|    |                   |                   |                   |
|----|-------------------|-------------------|-------------------|
| Si | 2.66876501905401  | 6.01661698704340  | 1.24801077186338  |
| Si | -1.05502723274883 | 3.99867685523723  | 1.44651431264761  |
| Si | -4.82468604106170 | 2.05568761437978  | 1.24509264898097  |
| Si | -8.29859130488718 | -0.02790371673774 | 0.83562685073633  |
| Si | 5.06142140549944  | 6.17118571905729  | 1.07098284364727  |
| Si | 1.35957053553411  | 4.03180359464329  | 1.40018623977610  |
| Si | -2.47919821323390 | 2.07800597305389  | 1.48356028216241  |
| Si | -5.95274867899337 | -0.02120298374211 | 1.09731719074484  |
| Si | -9.56091422453131 | -2.02744290293170 | 0.62840562765101  |
| Si | -8.35890770590140 | -4.10648922748097 | 0.64877008970356  |
| Si | -4.79609398567027 | -2.07933496713751 | 1.15509691443288  |
| Si | -1.75096941578423 | -0.15215564732166 | 1.75999636533959  |
| Si | 2.79670880214095  | 2.14992043960295  | 1.38349593937307  |
| Si | 6.21461395121970  | 4.08857596707180  | 0.97786276511957  |
| Si | 5.09192915943142  | 2.04064814664965  | 1.15185034423457  |
| Si | 1.74352203379974  | 0.10644795053417  | 1.72365194806087  |
| Si | -2.80032006428437 | -2.14180454687819 | 2.29928647307504  |
| Si | -6.01126995189813 | -4.05633840106478 | 0.93843759883458  |
| Si | 8.55455830300202  | 3.93906188945735  | 0.66809233552879  |
| Si | 9.55055281902194  | 1.74437960935152  | 0.65660016992687  |
| Si | 5.92882081627383  | -0.15772677249240 | 1.13872207215803  |
| Si | 2.48302282441310  | -1.98475825216725 | 2.44526627301834  |
| Si | -1.30268753765960 | -3.73600383426093 | 1.41879726112833  |
| Si | -4.78470032323859 | -6.07720623096527 | 1.06500888675396  |
| Si | 8.27303342531065  | -0.25462374381978 | 0.85941671212556  |
| Si | 4.52240374566945  | -2.07052396933705 | 1.31837790043558  |
| Si | 1.09029978170084  | -3.64913027636759 | 1.48777818791522  |
| Si | -2.40660233911519 | -5.83341868429961 | 1.21372567830898  |
| Si | 9.44449767977631  | -2.30788619065546 | 0.77196549131377  |
| Si | 5.73490983004882  | -4.06865723272978 | 1.16953000015251  |
| Si | 2.14041120087572  | -5.78503565882147 | 1.34887799442092  |
| Si | -1.33094575012403 | -7.93497890665874 | 1.29449855095392  |
| Si | 8.08137540551132  | -4.28115693321357 | 0.90525117518499  |
| Si | 4.50982102216475  | -6.08913554225083 | 1.30831959025095  |
| Si | 1.06053168624092  | -7.89236619049087 | 1.35294799413456  |
| H  | -1.49133434726758 | 9.18603566757198  | 2.15262825953047  |
| H  | -1.66153645022254 | 9.12315801255739  | -1.91234948013595 |
| H  | 5.40441117050945  | 7.18271236520221  | -2.26185588708017 |
| H  | 8.87785890064509  | 4.76788303190464  | -2.69519706446849 |
| H  | 8.27631534948177  | -5.39010495744495 | -2.38238747494388 |
| H  | 4.92246753813244  | -7.24650113546669 | -1.98597611257861 |
| H  | 1.78013803453999  | -8.95451147649522 | -1.89341694166502 |
| H  | -1.90382352258425 | -9.03847021117489 | -1.96970113980545 |
| H  | -5.12484593998185 | -7.15108693561678 | -2.26147393376795 |

|   |                    |                   |                   |
|---|--------------------|-------------------|-------------------|
| H | -8.62184962297001  | -5.00641978104971 | -2.69723168223445 |
| H | -8.59512908642465  | 5.22368749755536  | -2.37624672753429 |
| H | -5.11769663437326  | 7.34191712680902  | -2.02046372856090 |
| H | -5.31748531253762  | 7.30285321671929  | 2.10986617243173  |
| H | -9.05239185228758  | 5.15428619468570  | 1.68252242545740  |
| H | -9.10150672754185  | -5.19676390402135 | 1.35954835845688  |
| H | -5.37029045449341  | -7.16523384452639 | 1.91452535586230  |
| H | -1.93196850322399  | -8.99137383629058 | 2.17176753206482  |
| H | 1.61475361676888   | -8.97134461142155 | 2.23468792964010  |
| H | 5.04410411915985   | -7.15498566118193 | 2.21944886876891  |
| H | 8.75702923014228   | -5.37406925247272 | 1.67868856697167  |
| H | 9.43489018260379   | 4.93695701892915  | 1.35747774328240  |
| H | 5.72028569422928   | 7.27376204504986  | 1.84424028285419  |
| H | 1.92390273788090   | 9.13504293446138  | -1.97932324378196 |
| H | 1.90851720921297   | 9.17214727552016  | 2.10018983591764  |
| C | 0.44837477413318   | 0.60387509058222  | 3.04775993033838  |
| O | -0.62283252206018  | -0.33475290341096 | 3.01591055061049  |
| H | 0.07537333696649   | 1.64160556619834  | 2.91339409656243  |
| H | 10.87978959259025  | 1.76729142897879  | 1.35079757834565  |
| H | 10.45006210857669  | 1.62324336569942  | -2.68848321421708 |
| H | 10.73050265114640  | -2.44536790594674 | 1.52967893104820  |
| H | 10.36704665580847  | -2.44322342037038 | -2.58974733308983 |
| H | -10.74470372399068 | 2.14431011445805  | 1.50324722406210  |
| H | -10.39831876940099 | 2.17652613541589  | -2.56093835675235 |
| H | -10.86880469967203 | -2.12366078606581 | 1.35365560151731  |
| H | -10.45779427755618 | -1.95441697377166 | -2.73302491426765 |
| H | -2.95386524261019  | -2.27409827103170 | 3.77888619558486  |
| H | 2.56260381330182   | -2.09123899497480 | 3.93593142737574  |
| H | 0.94311822257777   | 0.54813945685609  | 4.03606796047776  |

• **2Si-OHCH<sub>2</sub>\***

|    |                   |                  |                   |
|----|-------------------|------------------|-------------------|
| Si | 1.32503612397098  | 8.03204172928495 | -1.11424756414705 |
| Si | -1.06333597621751 | 7.99120269549649 | -1.06542388183515 |
| Si | -2.24709039893640 | 5.93894540671405 | -1.02883502965671 |
| Si | -4.59676321926938 | 6.19630811713555 | -1.13086949727153 |
| Si | -5.67491378783654 | 4.09012413052624 | -1.23325125598373 |
| Si | -8.03290776623646 | 4.13533372241193 | -1.45421841079661 |
| Si | -9.24054868464220 | 2.07575941733864 | -1.59390523652340 |
| Si | 2.51458762657851  | 5.98089525953905 | -1.14292190832720 |
| Si | -1.06364956127082 | 3.90641935595831 | -0.98460914441521 |
| Si | -4.57198481148365 | 1.99772651668951 | -1.14726415082010 |
| Si | -8.05924128463661 | 0.02146479189136 | -1.54749269684256 |
| Si | 4.87709592218766  | 6.10957448296349 | -1.34669101678531 |

|    |                   |                   |                   |
|----|-------------------|-------------------|-------------------|
| Si | 1.25823842672052  | 3.99984384167544  | -1.03190743777250 |
| Si | -2.24750435471141 | 1.89449051290368  | -0.90428878661178 |
| Si | -5.72144551541551 | -0.03028284174609 | -1.32457291266034 |
| Si | -9.32960404318193 | -1.95488400392178 | -1.76096644571550 |
| Si | -8.06589279403077 | -3.98745364432493 | -1.74981155846075 |
| Si | -4.37863759956334 | -1.96186714940733 | -1.37026477226599 |
| Si | -1.16110414462204 | -0.18748841546771 | -0.74406770717346 |
| Si | 2.36934142546219  | 1.95427892202244  | -1.01425086669971 |
| Si | 5.89587786723396  | 3.96240281182972  | -1.40549444119252 |
| Si | 4.71628982374729  | 1.89988441347126  | -1.23982491684801 |
| Si | 1.18715844855578  | -0.08673899789737 | -0.69606482909994 |
| Si | -2.16407827871035 | -1.84958826451584 | -2.04167673905401 |
| Si | -5.70214728141507 | -3.91454769415933 | -1.51792209150031 |
| Si | 8.24865460560339  | 3.82023978945528  | -1.69394995284543 |
| Si | 9.28170461519063  | 1.65555040191407  | -1.71632520317411 |
| Si | 5.66391843971094  | -0.24596463725739 | -1.24914152240973 |
| Si | 2.03389252538206  | -1.79112684546314 | -2.12824380203105 |
| Si | -1.22589460621092 | -3.72348769402321 | -1.13211644456301 |
| Si | -4.62224234003603 | -6.01858469952947 | -1.38475185748026 |
| Si | 7.99989030981127  | -0.32387640154085 | -1.51646506709196 |
| Si | 4.14396235092295  | -2.05450200387473 | -1.08203766875990 |
| Si | 1.11086731329601  | -3.61560238039422 | -0.96167968176736 |
| Si | -2.27994193276930 | -5.80350513778348 | -1.21768737522964 |
| Si | 9.20950393664208  | -2.35015241433843 | -1.59638061374022 |
| Si | 5.46689389091451  | -4.03186899736360 | -1.18975590521209 |
| Si | 2.07006701646520  | -5.77392445513687 | -1.02235536691908 |
| Si | -1.29927696308287 | -7.95038778962649 | -1.10725003495934 |
| Si | 7.81114843468563  | -4.27778507028921 | -1.46209297804933 |
| Si | 4.39634496069541  | -6.13032135464154 | -1.08877698947897 |
| Si | 1.06655212276970  | -7.90918627082181 | -1.04845545954119 |
| Si | 1.38571019808793  | 8.00720226566796  | 1.28608889160519  |
| Si | -1.03743858072161 | 7.97592479728364  | 1.33861166792378  |
| Si | -2.30463913564426 | 5.96203675902663  | 1.36822458745028  |
| Si | -4.69074086216814 | 6.16392939283218  | 1.29045232726983  |
| Si | -5.87307285829903 | 4.09435823760824  | 1.16278671941899  |
| Si | -8.23447808179161 | 4.11010630573811  | 0.94177053647284  |
| Si | -9.42269713967313 | 2.01733413169729  | 0.80393360602934  |
| Si | 2.66602388171508  | 6.00786175079811  | 1.25290632634595  |
| Si | -1.05155833354310 | 3.93338685561834  | 1.43552702846384  |
| Si | -4.81018564703511 | 1.99226356223138  | 1.23404601561318  |
| Si | -8.27830180892500 | -0.06262758890241 | 0.84383160360239  |
| Si | 5.05638430261628  | 6.16315148081193  | 1.07205047607245  |
| Si | 1.35578080547804  | 4.02492215672960  | 1.38710173767986  |
| Si | -2.46490348218322 | 1.99333397404965  | 1.47414147093947  |

|    |                   |                   |                   |
|----|-------------------|-------------------|-------------------|
| Si | -5.92954997997166 | -0.08033575967687 | 1.07673173710147  |
| Si | -9.55494820848155 | -2.05019058711512 | 0.63060501975744  |
| Si | -8.30276567425626 | -4.09366407082442 | 0.63821713328168  |
| Si | -4.65892124575576 | -2.05698816065311 | 1.14379018209890  |
| Si | -1.88409895641148 | -0.29027090460606 | 1.58751755149119  |
| Si | 2.76395861858391  | 2.12883304353912  | 1.33028170671951  |
| Si | 6.19115399716914  | 4.07289856337384  | 0.97822474185046  |
| Si | 5.06332585799497  | 2.02613673459676  | 1.14153403108291  |
| Si | 1.71461677974749  | 0.07810515286942  | 1.65427173287964  |
| Si | -2.84294222953540 | -2.17291941231589 | 2.53738831057273  |
| Si | -5.95312896091717 | -3.97278058492625 | 0.86924802774098  |
| Si | 8.53397066433172  | 3.92249949646940  | 0.68899001106739  |
| Si | 9.53335714238059  | 1.73027958169871  | 0.67536782097777  |
| Si | 5.90754710233253  | -0.16653925503175 | 1.14692733581688  |
| Si | 2.44797277425882  | -1.99534356491566 | 2.43461454965458  |
| Si | -1.36101941309757 | -3.62851752268810 | 1.42400081618061  |
| Si | -4.75726888400319 | -6.00489508167381 | 1.01742472404458  |
| Si | 8.25159278299085  | -0.26441202585377 | 0.87456401145442  |
| Si | 4.49854554263044  | -2.07399127272342 | 1.32732623316435  |
| Si | 1.04183081321310  | -3.64118246274700 | 1.46933504468837  |
| Si | -2.38604297697293 | -5.75727050150439 | 1.18758722059829  |
| Si | 9.41824172779388  | -2.32042571930142 | 0.79631756253119  |
| Si | 5.70638112240908  | -4.07611442047650 | 1.19318455565396  |
| Si | 2.10618765224908  | -5.77416899556186 | 1.36626068121791  |
| Si | -1.35786625681871 | -7.87966338607785 | 1.29118049180140  |
| Si | 8.05162894189212  | -4.29059743512930 | 0.93036885242368  |
| Si | 4.47188095508404  | -6.09045302998279 | 1.32617235336935  |
| Si | 1.03124974191238  | -7.88124968659745 | 1.35785505343218  |
| H  | -1.52354706023057 | 9.12143608736745  | 2.17677575455963  |
| H  | -1.69806760936603 | 9.07501354798678  | -1.88307819198203 |
| H  | 5.40028594030502  | 7.18127906664373  | -2.25394929296891 |
| H  | 8.88857329253617  | 4.76423956150140  | -2.66627704460047 |
| H  | 8.24763835398912  | -5.39830261310751 | -2.35709008203716 |
| H  | 4.88162425425095  | -7.24516742577217 | -1.96618734390541 |
| H  | 1.75727242173197  | -8.93495639271037 | -1.89424138351366 |
| H  | -1.94560004840125 | -8.99669115694052 | -1.96241225987908 |
| H  | -5.09655769409711 | -7.10158879150433 | -2.30525998779114 |
| H  | -8.61103826634425 | -5.01336365594846 | -2.69680153119502 |
| H  | -8.60347758060726 | 5.20245620070065  | -2.33779021277620 |
| H  | -5.10866538635798 | 7.30348887740355  | -2.00054799555378 |
| H  | -5.30395350480909 | 7.22899611999505  | 2.14865511769193  |
| H  | -9.02292006348566 | 5.11346816349438  | 1.72838365354598  |
| H  | -8.98653750737287 | -5.20631368579841 | 1.37293774274046  |
| H  | -5.35949859206595 | -7.06401412893705 | 1.89069377137824  |

|   |                    |                   |                   |
|---|--------------------|-------------------|-------------------|
| H | -1.98953782777154  | -8.91353207074181 | 2.17374577044428  |
| H | 1.57369822815206   | -8.96432653688061 | 2.24225052175053  |
| H | 5.00482522845048   | -7.16086985915861 | 2.23312708172033  |
| H | 8.72679539690331   | -5.38261779543579 | 1.70553108935186  |
| H | 9.40246718009557   | 4.92248472227411  | 1.39018419020813  |
| H | 5.71920807687699   | 7.26152705059547  | 1.84763599527755  |
| H | 1.88453901328728   | 9.13390841927616  | -1.96159808012898 |
| H | 1.88039674943601   | 9.15003354856226  | 2.12187006527045  |
| C | 0.49434564812386   | 0.62099675127033  | 3.0355155772698   |
| O | -0.58591169230467  | -0.37876773334567 | 3.03321645268653  |
| H | 0.04639193147257   | 1.62460419672215  | 2.91867020959962  |
| H | 10.85954586994251  | 1.75376767957707  | 1.37533766453022  |
| H | 10.44021740871058  | 1.60993060653768  | -2.66693770029602 |
| H | 10.70230852209201  | -2.45365448604052 | 1.55806867861698  |
| H | 10.34939528672009  | -2.46369014855685 | -2.56181160614385 |
| H | -10.72289728923321 | 2.09531449737288  | 1.54647289294665  |
| H | -10.41372976200279 | 2.15651638188891  | -2.52299215609023 |
| H | -10.85249786108425 | -2.15628153796610 | 1.37267549969832  |
| H | -10.47167953330568 | -1.96095756978396 | -2.73049669105349 |
| H | -1.10287417710341  | -0.44968369579017 | 3.86855980887474  |
| H | 2.49029702206605   | -2.04684315645311 | 3.93298680074382  |
| H | 1.01262809986785   | 0.54844399265023  | 4.00689495472300  |

• **2Si-OHCH<sub>2</sub>**

|    |                   |                    |                   |
|----|-------------------|--------------------|-------------------|
| Si | 1.83720510071643  | 0.16014683251723   | -0.20962590496860 |
| Si | -0.56275962525972 | 0.18761676721428   | -0.20462313058841 |
| Si | -1.76258182083913 | -1.85415643687483  | -0.20570248087017 |
| Si | -4.12754066155597 | -1.66629639361718  | -0.21465504284809 |
| Si | -5.19133698214501 | -3.78853582781422  | -0.19686041479738 |
| Si | -7.55678919019150 | -3.71985490333685  | -0.19444835872367 |
| Si | -8.75591586924741 | -5.79244323727379  | -0.18741040254080 |
| Si | 3.01798483852218  | -1.89719956073450  | -0.20372098009359 |
| Si | -0.57573136484133 | -3.89717842556964  | -0.20941569984816 |
| Si | -4.04806350156057 | -5.85576950130052  | -0.19408812766235 |
| Si | -7.54877509921448 | -7.83183496297043  | -0.17652202960065 |
| Si | 5.38153632304883  | -1.75759047424352  | -0.21260933210744 |
| Si | 1.77110055584420  | -3.91038879052518  | -0.19024655604681 |
| Si | -1.70203965912779 | -5.95607042925199  | -0.22020313614492 |
| Si | -5.19263051571761 | -7.90035337501244  | -0.19200082665029 |
| Si | -8.83853739773914 | -9.81045123665377  | -0.16261188324880 |
| Si | -7.53972712142879 | -11.81443897134312 | -0.14660064418481 |
| Si | -3.82146930039465 | -9.78234258266145  | -0.43785797417658 |
| Si | -0.67647645387586 | -8.08375749538663  | -0.27270833830750 |



|    |                   |                    |                   |
|----|-------------------|--------------------|-------------------|
| Si | 2.68135287695990  | -6.08733038820405  | -0.20497006464167 |
| Si | 6.27351881228302  | -3.95299717993668  | -0.19907902905551 |
| Si | 5.02807587097911  | -5.96436901524358  | -0.18668009917422 |
| Si | 1.60741339501117  | -8.06586697017780  | -0.70742091817372 |
| Si | -1.74187639188051 | -9.83603536301047  | -1.38823699455861 |
| Si | -5.17407740633535 | -11.67325574068357 | -0.14841304609330 |
| Si | 8.64233429161367  | -3.99847879247538  | -0.21453644330174 |
| Si | 9.77667022261777  | -6.10569899462268  | -0.22206972483781 |
| Si | 6.12218562668551  | -8.03563783093637  | -0.21340081162915 |
| Si | 2.65420211294678  | -9.91803242167439  | -1.40884416842042 |
| Si | -0.80406766631219 | -11.59453679839245 | -0.20556522346724 |
| Si | -4.20674161335700 | -13.82863957083844 | -0.14739646416488 |
| Si | 8.47861596620216  | -8.08297123403228  | -0.22517900364227 |
| Si | 4.67930546132443  | -9.90136517231245  | -0.23184855516106 |
| Si | 1.56527479476166  | -11.59976848327712 | -0.18778601685550 |
| Si | -1.84750587315985 | -13.70390028250547 | -0.16168297676119 |
| Si | 9.69809825245637  | -10.10527993665726 | -0.22590016200063 |
| Si | 5.98528510765097  | -11.87682064612198 | -0.20395442094747 |
| Si | 2.56542216034396  | -13.74976169236975 | -0.17735654717017 |
| Si | -0.86277264704214 | -15.84997726062327 | -0.16729684834434 |
| Si | 8.34502405079334  | -12.07642766953436 | -0.21833224083659 |
| Si | 4.92134217221266  | -13.98723707017410 | -0.20579267962764 |
| Si | 1.51823827698315  | -15.86817428971691 | -0.18198601665197 |
| Si | 1.84238467783276  | 0.16624032799543   | 2.19495598263149  |
| Si | -0.55810222683188 | 0.18415550012290   | 2.20101495361538  |
| Si | -1.75871188741836 | -1.85885719273296  | 2.19878614510346  |
| Si | -4.12389092352768 | -1.66293560652539  | 2.21440698099341  |
| Si | -5.18557509292233 | -3.78619066915473  | 2.20461874882988  |
| Si | -7.55212525928235 | -3.71672658685376  | 2.21342720422985  |
| Si | -8.75846446293506 | -5.78446864437721  | 2.21754590712071  |
| Si | 3.02019125034599  | -1.89174704110525  | 2.19953313424849  |
| Si | -0.57078494436050 | -3.90320244453580  | 2.19644237200176  |
| Si | -4.03905269295292 | -5.85181647234462  | 2.19729408942435  |
| Si | -7.54840898415545 | -7.82050170445595  | 2.22513896126872  |
| Si | 5.38496054547970  | -1.75839408473605  | 2.21052658456153  |
| Si | 1.77839910926808  | -3.90481702530333  | 2.20668317881706  |
| Si | -1.69537177145573 | -5.96458050016644  | 2.18468626774988  |
| Si | -5.19501233923880 | -7.88919975205353  | 2.23624485541637  |
| Si | -8.83690242198454 | -9.79936165689148  | 2.24056804379289  |
| Si | -7.54831014866592 | -11.81056224756945 | 2.25140746414917  |
| Si | -3.84112345975525 | -9.77622759782354  | 2.51187304910096  |
| Si | -0.63119039774312 | -8.07358639568700  | 2.16273350954195  |
| Si | 2.67115004489832  | -6.08663686410697  | 2.23198986797658  |
| Si | 6.28474989649955  | -3.95166367846508  | 2.20340280285763  |

|    |                   |                    |                   |
|----|-------------------|--------------------|-------------------|
| Si | 5.02748776747073  | -5.96060794261122  | 2.20592622122804  |
| Si | 1.46588167517489  | -7.84746292018416  | 3.20606119337621  |
| Si | -1.71022232395001 | -9.76646869264124  | 3.33698667224695  |
| Si | -5.18265268813783 | -11.67978398676081 | 2.27622201866774  |
| Si | 8.65470822384188  | -3.99550708442747  | 2.19150260279969  |
| Si | 9.78251974435611  | -6.10623237200238  | 2.18353985737040  |
| Si | 6.12919093181905  | -8.03256055027560  | 2.18772204481624  |
| Si | 2.65413595992427  | -9.88241293657514  | 3.33254393097027  |
| Si | -0.79978871684670 | -11.60450835467634 | 2.27046481390313  |
| Si | -4.20631920080717 | -13.83202957551460 | 2.25257583130877  |
| Si | 8.48454300185246  | -8.08310623599118  | 2.18169289790929  |
| Si | 4.70169487432695  | -9.90093500614893  | 2.20417283079017  |
| Si | 1.56392760055036  | -11.62450021412053 | 2.22064289635466  |
| Si | -1.84711249023157 | -13.70770902626602 | 2.24602582410933  |
| Si | 9.70877325234087  | -10.10179135560966 | 2.17920134722206  |
| Si | 5.99262679633625  | -11.87446017345680 | 2.19695300119376  |
| Si | 2.58296948690338  | -13.75394105759618 | 2.22027647822348  |
| Si | -0.85521882473038 | -15.85097077131273 | 2.23583367793723  |
| Si | 8.35367563241955  | -12.06969702667562 | 2.18418658889145  |
| Si | 4.93617234324050  | -13.98607145446238 | 2.20582521642018  |
| Si | 1.52641636451856  | -15.86645990080846 | 2.22346478478135  |
| H  | -1.10406506297464 | 1.29615039299705   | 3.04508341218097  |
| H  | -1.10761170853646 | 1.30440100968375   | -1.04287334919335 |
| H  | 6.02969374998046  | -0.73367360664943  | -1.09391768188629 |
| H  | 9.33457970556867  | -2.97351238335617  | -1.06126715987465 |
| H  | 8.92261275684303  | -13.17476751101342 | -1.05933259771463 |
| H  | 5.49207534536615  | -15.04674983597550 | -1.10030995729713 |
| H  | 2.11728316928793  | -16.93877545876899 | -1.04301269182821 |
| H  | -1.51172973464900 | -16.89115727709795 | -1.02774284400002 |
| H  | -4.86204774259216 | -14.82292065010956 | -1.05595391577590 |
| H  | -8.11673172895301 | -12.91607310476641 | -0.98224121509344 |
| H  | -8.23047321977171 | -2.68236963129326  | -1.04066435287182 |
| H  | -4.72999381812023 | -0.60835645717635  | -1.08851284271516 |
| H  | -4.72068278677182 | -0.60216080137298  | 3.08899667139455  |
| H  | -8.21558533990477 | -2.67275726850773  | 3.05986999236702  |
| H  | -8.14531714781032 | -12.90146290659938 | 3.08721531920940  |
| H  | -4.84449790752581 | -14.83575800531780 | 3.16321839643896  |
| H  | -1.48872942630563 | -16.89611612850813 | 3.10328611363655  |
| H  | 2.13944356524580  | -16.93026157566789 | 3.08338366918077  |
| H  | 5.52077837924946  | -15.03605171282495 | 3.10284290917448  |
| H  | 8.92514076798582  | -13.16886375130899 | 3.02855509079626  |
| H  | 9.36286886407700  | -2.97478105317289  | 3.03038178666065  |
| H  | 6.02801741821344  | -0.72812542017268  | 3.08840914310180  |
| H  | 2.40126178037607  | 1.26274953713970   | -1.05396112296565 |

|   |                    |                    |                   |
|---|--------------------|--------------------|-------------------|
| H | 2.40774418564083   | 1.27480485883569   | 3.03074943517367  |
| C | 0.91363016726862   | -7.48333364929060  | 5.02090146714327  |
| O | 0.24644954804317   | -8.67343665680601  | 5.46564291602665  |
| H | 0.24052046536347   | -6.59971243171136  | 5.02043274028434  |
| H | 11.01886276683522  | -6.09605578864954  | 3.03093243994863  |
| H | 11.00907274831667  | -6.08484632450471  | -1.07484705663454 |
| H | 10.92666185353158  | -10.19875224974494 | 3.04713201710317  |
| H | 10.91178954494320  | -10.20464162049320 | -1.09929314456889 |
| H | -9.99642402643915  | -5.72766005954054  | 3.06065852973506  |
| H | -9.99256398443346  | -5.74467412552616  | -1.03291953503554 |
| H | -10.04995162704424 | -9.84894467074569  | 3.11827608060071  |
| H | -10.05138363881749 | -9.87936478157437  | -1.03909886635077 |
| H | -0.24256773678279  | -8.47423278985266  | 6.28483603444441  |
| H | 2.86515573253985   | -10.19879799651491 | 4.78036838480961  |
| H | 1.78986527255824   | -7.24620984079251  | 5.66025752936905  |

• **2Si...CH<sub>3</sub>OH**

|    |                   |                   |                   |
|----|-------------------|-------------------|-------------------|
| Si | 1.43072854648584  | 8.02330689578989  | -1.24127699629906 |
| Si | -0.97281414241223 | 8.07848704564367  | -1.22060390206276 |
| Si | -2.21122773389977 | 6.05551695369475  | -1.23358199235504 |
| Si | -4.57825322325160 | 6.21165594696778  | -1.22802737354483 |
| Si | -5.59313170438455 | 4.06162559749489  | -1.22964475393193 |
| Si | -7.95889516425365 | 4.12711865967431  | -1.21438208836517 |
| Si | -9.15371367580766 | 2.05496726473141  | -1.22193663560559 |
| Si | 2.56717481509163  | 5.94113810125622  | -1.28360386207639 |
| Si | -1.06080929507532 | 3.99065198611675  | -1.31128643105521 |
| Si | -4.43097863984916 | 2.00295015479445  | -1.29918635499312 |
| Si | -7.92564451187842 | 0.02977276545153  | -1.25733584580190 |
| Si | 4.93855498076884  | 6.00155498765384  | -1.30880962944771 |
| Si | 1.29322511421364  | 3.94945390758688  | -1.30035012080615 |
| Si | -2.09802810797938 | 1.89580882522936  | -1.30958069532595 |
| Si | -5.57135047200940 | -0.04442596635794 | -1.30513266787701 |
| Si | -9.23342387126959 | -1.93815054245894 | -1.25842504264718 |
| Si | -7.98526300550707 | -3.97353284069378 | -1.28131595599823 |
| Si | -4.26986892696789 | -1.96925178857433 | -1.59039807073071 |
| Si | -1.13241420577764 | -0.23717720143258 | -1.43750339244361 |
| Si | 2.27561423457636  | 1.81475219930948  | -1.35677646358827 |
| Si | 5.86566867099886  | 3.81463307321667  | -1.32854423988424 |
| Si | 4.62344440291094  | 1.80245923248162  | -1.34463300348962 |
| Si | 1.23172697672761  | -0.29288420361712 | -1.43199751149592 |
| Si | -2.17373658517394 | -2.01462182947739 | -2.50681568856111 |
| Si | -5.61887195713009 | -3.86428162134035 | -1.31046356350837 |
| Si | 8.23252836552459  | 3.77031046794127  | -1.34151716787798 |

|    |                   |                   |                   |
|----|-------------------|-------------------|-------------------|
| Si | 9.34601971933864  | 1.65123864691418  | -1.36815076486362 |
| Si | 5.69858412863214  | -0.28292142744325 | -1.38303547518231 |
| Si | 2.21380964700041  | -2.08613122266287 | -2.51170235422168 |
| Si | -1.20893865400779 | -3.80044653962202 | -1.37879169995526 |
| Si | -4.64084065639049 | -6.01557699394202 | -1.33323590633305 |
| Si | 8.05468083995360  | -0.33396166272651 | -1.38122258620529 |
| Si | 4.28023785407371  | -2.15003794802327 | -1.48223536361626 |
| Si | 1.15600335250345  | -3.83090591152818 | -1.42465666409156 |
| Si | -2.28015496908119 | -5.89788232825736 | -1.35236816126087 |
| Si | 9.28812199718397  | -2.34830172900483 | -1.40409835111229 |
| Si | 5.57863240286541  | -4.10221289737723 | -1.39889227920753 |
| Si | 2.14171818399001  | -5.96784141470152 | -1.39001712325053 |
| Si | -1.30144167817581 | -8.04641044473046 | -1.37825738306123 |
| Si | 7.93738141510668  | -4.31878631118052 | -1.40912146393721 |
| Si | 4.49524834708381  | -6.20222694675289 | -1.40950298359286 |
| Si | 1.07980722972011  | -8.07804760693098 | -1.39793674593683 |
| Si | 1.44876176863866  | 7.98791739134700  | 1.16308769023685  |
| Si | -0.95351475770584 | 8.04319548606018  | 1.18224368472727  |
| Si | -2.18738026265831 | 6.01754860844334  | 1.16933416347918  |
| Si | -4.55252434235937 | 6.17590684934798  | 1.19798283474418  |
| Si | -5.56704288696170 | 4.02831796406616  | 1.17027120144414  |
| Si | -7.93238430914521 | 4.10074167297313  | 1.19370429126876  |
| Si | -9.12628833325606 | 2.02977640193592  | 1.18319291140752  |
| Si | 2.58241663202465  | 5.90476734809903  | 1.11865488781639  |
| Si | -1.04553509570067 | 3.94934509282268  | 1.08941942856808  |
| Si | -4.40634362094473 | 1.97159016803628  | 1.09431727579459  |
| Si | -7.89707600236080 | 0.00568438171764  | 1.14274299470102  |
| Si | 4.95273416728199  | 5.97097732802669  | 1.11816170120953  |
| Si | 1.30751556988712  | 3.91463399160128  | 1.09937999001493  |
| Si | -2.07597399296376 | 1.84290291023515  | 1.15530605612254  |
| Si | -5.54460739676932 | -0.07332479037927 | 1.13824114004345  |
| Si | -9.21050700781297 | -1.95657813926201 | 1.14424992441880  |
| Si | -7.96076974474365 | -3.98939948195958 | 1.11668794076785  |
| Si | -4.21981178596656 | -1.99348589971858 | 1.34730325790345  |
| Si | -1.11930251844951 | -0.29587073117767 | 1.00998390570852  |
| Si | 2.28302114621534  | 1.77823481262816  | 1.05505316918446  |
| Si | 5.87613829789188  | 3.78416766575493  | 1.07448276631847  |
| Si | 4.63064544730689  | 1.77408608814339  | 1.04689359057169  |
| Si | 1.24454052402506  | -0.33296876496475 | 1.05886210832181  |
| Si | -2.09964099029632 | -2.01616474104896 | 2.23643022757943  |
| Si | -5.59258327758051 | -3.88039730334809 | 1.10598672575471  |
| Si | 8.24341851365838  | 3.74294969531879  | 1.06741462760254  |
| Si | 9.35908176778764  | 1.62650911412204  | 1.03659562160861  |
| Si | 5.70898372412058  | -0.30865516908878 | 1.03815865471739  |

|    |                    |                   |                   |
|----|--------------------|-------------------|-------------------|
| Si | 2.22833521971118   | -2.10532068937266 | 2.17238503652436  |
| Si | -1.18812403349080  | -3.81553312924656 | 1.08438636557205  |
| Si | -4.62088665158307  | -6.03468209102387 | 1.06886954273309  |
| Si | 8.06439331166038   | -0.35600553214222 | 1.02128975181437  |
| Si | 4.28789178339456   | -2.17389347926081 | 1.12448053822914  |
| Si | 1.17696063767878   | -3.84982430109777 | 1.08168019412341  |
| Si | -2.26023681520549  | -5.91336885432735 | 1.04821971186558  |
| Si | 9.30081115933750   | -2.36816114619525 | 0.99995962426963  |
| Si | 5.59180780417852   | -4.12293265475648 | 1.01319577191614  |
| Si | 2.16038548676226   | -5.98620240911919 | 1.01289246856824  |
| Si | -1.28249536594775  | -8.06328424755784 | 1.02553296714316  |
| Si | 7.95100494557222   | -4.33843081572024 | 0.99064306466037  |
| Si | 4.51330768432314   | -6.22507309838045 | 0.99357212219592  |
| Si | 1.09831130560965   | -8.09566759415165 | 1.00546181226120  |
| H  | -1.47590975731877  | 9.15802349031065  | 2.03755822843013  |
| H  | -1.50580926383909  | 9.21928963222090  | -2.03404122304485 |
| H  | 5.59871225004619   | 7.03564180536581  | -2.16942715313343 |
| H  | 8.94446646214841   | 4.79014362359632  | -2.17812972618470 |
| H  | 8.48989435982548   | -5.41982882049299 | -2.26270214054803 |
| H  | 5.06249590392360   | -7.23611653712876 | -2.33417381288102 |
| H  | 1.68192065938643   | -9.13525997756928 | -2.27289349385842 |
| H  | -1.95057854440053  | -9.08203884875078 | -2.24519723602760 |
| H  | -5.29533094069524  | -7.00916211495009 | -2.24383039086714 |
| H  | -8.60041553002949  | -5.05082935192578 | -2.12147158770594 |
| H  | -8.63889797457581  | 5.17467132028199  | -2.04319736222938 |
| H  | -5.21398837117887  | 7.26875088441192  | -2.07934519860757 |
| H  | -5.17363288720261  | 7.21000224451450  | 2.08733739929091  |
| H  | -8.59135394648077  | 5.13238631551893  | 2.05857251453886  |
| H  | -8.55531551390185  | -5.08029280494397 | 1.95416224767501  |
| H  | -5.25772885579415  | -7.04605078214194 | 1.97238818220949  |
| H  | -1.91813974339992  | -9.11107494213290 | 1.88792749901938  |
| H  | 1.71627265060581   | -9.16486134335508 | 1.85441185551648  |
| H  | 5.09139260563934   | -7.27953127991447 | 1.88777594556246  |
| H  | 8.51294065155146   | -5.45371760650590 | 1.81917655912603  |
| H  | 8.95655547142596   | 4.74766318544360  | 1.92109322317534  |
| H  | 5.62056016551537   | 6.98419990659157  | 1.99763296955099  |
| H  | 2.00224016458122   | 9.13787323364770  | -2.06490701627689 |
| H  | 2.03919440499776   | 9.07280308836967  | 2.01273266400224  |
| H  | 10.60052691404522  | 1.62085179165824  | 1.87665479221687  |
| H  | 10.57868553648914  | 1.66744813634824  | -2.22090890355648 |
| H  | 10.51833172860053  | -2.46731435678892 | 1.86745771121079  |
| H  | 10.49579558497510  | -2.43909442049992 | -2.28619282086529 |
| H  | -10.35331906195107 | 2.05509653330910  | 2.04375991439651  |
| H  | -10.40040904424650 | 2.10430624965051  | -2.05254665845589 |

|   |                    |                   |                   |
|---|--------------------|-------------------|-------------------|
| H | -10.41440646281130 | -1.99515986440079 | 2.03508888351237  |
| H | -10.45464735042165 | -1.97060706489419 | -2.12565598356617 |
| C | -0.72867958430644  | 1.70708103067100  | 4.11437459706931  |
| O | -2.05305406962413  | 1.54145717115995  | 3.58397646049018  |
| H | -0.51534973899103  | 2.78670241220905  | 4.09460504500757  |
| H | -2.26205152414546  | 0.58176218203218  | 3.58009771564039  |
| H | 0.02455196162391   | 1.18070741807711  | 3.49512946319405  |
| H | -0.67476705969792  | 1.34166522051449  | 5.15534984866207  |

• **2Si-CH<sub>3</sub>OH + H<sub>2</sub>**

|    |                   |                   |                   |
|----|-------------------|-------------------|-------------------|
| Si | 0.86981394889119  | 8.11385411816088  | 0.31323982024869  |
| Si | -1.50822527093788 | 7.97665272847505  | 0.04498230140271  |
| Si | -2.51760912831368 | 5.89412588514367  | -0.44928069087892 |
| Si | -4.85647488235087 | 5.81207332809940  | -0.71747157358505 |
| Si | -5.54210506887572 | 3.60766695750486  | -1.26325319255165 |
| Si | -7.88947610249521 | 3.78484332417526  | -1.43364316380573 |
| Si | -9.08262030599509 | 1.78583595635372  | -1.93147747516328 |
| Si | 2.12812421315886  | 6.12274213229025  | 0.05740055041490  |
| Si | -1.29004085953768 | 3.90630990658696  | -0.70990112885622 |
| Si | -4.32078346151417 | 2.11764172808338  | -2.55107700246025 |
| Si | -7.69632363136555 | -0.11316446580152 | -2.16708758996148 |
| Si | 4.47927621500168  | 6.32954632436017  | 0.31777137549217  |
| Si | 1.03384428755737  | 4.07811403681945  | -0.42985815543400 |
| Si | -2.43558739892592 | 1.93841244540201  | -1.24266854438681 |
| Si | -5.37421779113880 | 0.15654654437966  | -1.94033980387359 |
| Si | -8.93190526049388 | -2.06956107326484 | -2.63776165906711 |
| Si | -7.64444486389739 | -4.05868475296445 | -2.86774725613615 |
| Si | -4.11146764354846 | -1.82949285549099 | -2.17132400749907 |
| Si | -1.10032417200838 | -0.00193125941100 | -1.48968648101856 |
| Si | 2.18835934397951  | 2.06080470542324  | -0.73311463272544 |
| Si | 5.59246584314665  | 4.24704611476006  | 0.05589061570314  |
| Si | 4.50634546096681  | 2.20698818815539  | -0.43959106221594 |
| Si | 1.25264970005265  | -0.01882331420617 | -1.25832345035291 |
| Si | -1.94349784030149 | -1.60992759938070 | -2.90332685265927 |
| Si | -5.31641414896519 | -3.79408619987920 | -2.59161135981152 |
| Si | 7.94360932343742  | 4.33196306515853  | 0.31728936271430  |
| Si | 9.16628812351229  | 2.29134499213589  | 0.06396564139779  |
| Si | 5.66034572787610  | 0.19059639139014  | -0.72354898705737 |
| Si | 2.42750916718586  | -1.53355147413957 | -2.56932369897895 |
| Si | -0.90823872795195 | -3.52635980632716 | -2.15741465782062 |
| Si | -4.17927678880339 | -5.84589213373669 | -2.84866140969463 |
| Si | 7.99393521997677  | 0.29195467593883  | -0.42788777232594 |
| Si | 4.42185197918199  | -1.65748142339221 | -1.44494372314943 |

|    |                   |                   |                   |
|----|-------------------|-------------------|-------------------|
| Si | 1.43296161862184  | -3.50585094670996 | -1.86045569382872 |
| Si | -1.84560428833751 | -5.62892656084704 | -2.57560379293040 |
| Si | 9.34267183445304  | -1.63498946549216 | -0.64852452962464 |
| Si | 5.79668692173723  | -3.55634988479353 | -1.37460855719571 |
| Si | 2.53603624633859  | -5.57337452378454 | -2.09287579557944 |
| Si | -0.76386656189188 | -7.71156065247820 | -2.83016333387302 |
| Si | 8.15295535397536  | -3.64521756574543 | -1.14196637520078 |
| Si | 4.88494793110946  | -5.68294908965755 | -1.86274466544254 |
| Si | 1.60363386641512  | -7.68742048290989 | -2.58127222784343 |
| Si | 0.63211923563684  | 7.66451643989883  | 2.66378913939489  |
| Si | -1.74636405528806 | 7.53056491549599  | 2.40078954436657  |
| Si | -2.75495830489665 | 5.44856689337380  | 1.90402308354142  |
| Si | -5.09247324862262 | 5.36213384863732  | 1.64182573985910  |
| Si | -5.78589445053759 | 3.15336548563114  | 1.16021978628680  |
| Si | -8.12507417897256 | 3.34600803784619  | 0.91151427839085  |
| Si | -9.30729108162939 | 1.34376925662641  | 0.41685488659574  |
| Si | 1.89841789138677  | 5.67870421816561  | 2.41057908376801  |
| Si | -1.50830592741381 | 3.47109335626197  | 1.66458748411644  |
| Si | -4.79084740388414 | 1.24005435040342  | 1.97482517680141  |
| Si | -7.91659224922238 | -0.55087519354948 | 0.19006597269085  |
| Si | 4.24459771587990  | 5.88576949418087  | 2.69243418814908  |
| Si | 0.81281358451043  | 3.63553887559678  | 1.91794323377872  |
| Si | -2.60220462266445 | 1.44576883167315  | 1.29816116812963  |
| Si | -5.60406278994809 | -0.32914672177284 | 0.51011369800733  |
| Si | -9.15917062951308 | -2.49870232228982 | -0.28545025624093 |
| Si | -7.87127617418666 | -4.48622415609403 | -0.51575223296025 |
| Si | -4.30785134844579 | -2.29403829882492 | 0.29314426292797  |
| Si | -1.34223655709642 | -0.50167771919962 | 0.87675896325986  |
| Si | 1.94609110931945  | 1.60547797519055  | 1.62531193871487  |
| Si | 5.34927027236292  | 3.80325507106503  | 2.40228189764877  |
| Si | 4.26453804820085  | 1.76267502959338  | 1.90478067609867  |
| Si | 1.00257223870216  | -0.48337500141267 | 1.15679481606129  |
| Si | -2.39975269801199 | -2.43342101070277 | 1.59719283741565  |
| Si | -5.54253803772054 | -4.22435602851312 | -0.22095508701923 |
| Si | 7.69865585861421  | 3.88679799334906  | 2.67227171885544  |
| Si | 8.92444377294958  | 1.84997119680260  | 2.41616552607498  |
| Si | 5.41324743004442  | -0.26184296233156 | 1.67464475853087  |
| Si | 1.93255377375448  | -2.39571965202306 | 2.08426492430399  |
| Si | -1.18936237775216 | -3.95063391877069 | 0.33432825184954  |
| Si | -4.41692910611123 | -6.28061344343579 | -0.49899601082184 |
| Si | 7.75078617790921  | -0.14801619929030 | 1.91915745974499  |
| Si | 4.12164684861462  | -2.19752274476646 | 1.43270997559308  |
| Si | 1.16581260779086  | -3.95240614810195 | 0.54567256983122  |
| Si | -2.08603244151884 | -6.05232870212099 | -0.20077279178905 |

|    |                    |                   |                   |
|----|--------------------|-------------------|-------------------|
| Si | 9.10129087315621   | -2.07376393474750 | 1.70251892343241  |
| Si | 5.55387559051588   | -3.99870720641225 | 0.98567955297441  |
| Si | 2.28485512803531   | -6.00453996573720 | 0.25453366931387  |
| Si | -1.00823417663313  | -8.13629014131564 | -0.47879123941698 |
| Si | 7.91223116425881   | -4.08366622809614 | 1.20407875229168  |
| Si | 4.63498768590852   | -6.11863221009469 | 0.48692885141550  |
| Si | 1.35874245369725   | -8.12141172366493 | -0.22934566598310 |
| H  | -2.46181123998991  | 8.42650967598109  | 3.36663339691862  |
| H  | -2.05949841933641  | 9.18567310400735  | -0.64896489396747 |
| H  | 5.14061973179678   | 7.53279570583083  | -0.28230835040854 |
| H  | 8.67717815960715   | 5.50792279416377  | -0.25226529757691 |
| H  | 8.87014274213321   | -4.55156690381573 | -2.09519043137471 |
| H  | 5.65197203080567   | -6.49406288454188 | -2.86178942281534 |
| H  | 2.34492604641626   | -8.55463429101378 | -3.55242043396872 |
| H  | -1.27419174500322  | -8.60047648215506 | -3.92297608373095 |
| H  | -4.62391636785365  | -6.71760519963917 | -3.98321106099895 |
| H  | -8.09187614026694  | -4.98108318646735 | -3.96033775407614 |
| H  | -8.42006456977100  | 5.01799237120731  | -2.09793057403831 |
| H  | -5.53919199956386  | 6.91890104219743  | -1.46030714158454 |
| H  | -5.96463293210783  | 6.12467027121984  | 2.59073537492185  |
| H  | -8.81550190884042  | 4.27646899441502  | 1.86063022907345  |
| H  | -8.49225921106014  | -5.71369322255613 | 0.07818038780131  |
| H  | -5.04860616116226  | -7.48361876161098 | 0.13251616196392  |
| H  | -1.70057494874589  | -9.32694335728448 | 0.11096322001918  |
| H  | 1.92476756632541   | -9.30121178866902 | 0.50034576524710  |
| H  | 5.20381307654841   | -7.26668983648574 | 1.26339583375475  |
| H  | 8.45958980610308   | -5.29672845325574 | 1.89199751814150  |
| H  | 8.24866254124552   | 4.75550421725617  | 3.76231943001319  |
| H  | 4.73551238381176   | 6.77052031197432  | 3.79775706166986  |
| H  | 1.44195659676897   | 9.37774689325695  | -0.25319206235092 |
| H  | 1.04118229639311   | 8.61116980113956  | 3.75106259720049  |
| H  | 10.06929710748696  | 1.73413114289958  | 3.37633096505944  |
| H  | 10.48188046999426  | 2.48680877626853  | -0.62683144868592 |
| H  | 10.21911574805029  | -2.25706207866898 | 2.68280397163997  |
| H  | 10.63790347272486  | -1.50355512486474 | -1.38967493758541 |
| H  | -10.59290548077172 | 1.16011301383651  | 1.16471194859080  |
| H  | -10.20627874493301 | 1.94304033800085  | -2.91054980149581 |
| H  | -10.45506132183754 | -2.67167259928668 | 0.44685425344556  |
| H  | -10.06128679418216 | -1.94315901652114 | -3.61445894129141 |
| C  | -0.70426949023980  | 0.48953675977549  | 4.35680689277932  |
| O  | -2.02494108184287  | 0.62050381589168  | 3.82875999925808  |
| H  | -0.21204934992020  | 1.46558232083238  | 4.21966880920418  |
| H  | -2.43229333119162  | -0.26732083052035 | 3.76827871708949  |
| H  | -0.11803738345367  | -0.28043790274756 | 3.81735233487257  |



|   |                   |                  |                  |
|---|-------------------|------------------|------------------|
| H | -0.72125051472036 | 0.24283159373187 | 5.43590868519412 |
| H | -3.37563906127807 | 3.47206103102311 | 4.63489528264318 |
| H | -3.14478730824308 | 2.76915029028668 | 4.45881692907859 |

• **2Si-CH<sub>3</sub>OH-H<sub>2</sub>**

|    |                   |                   |                   |
|----|-------------------|-------------------|-------------------|
| Si | 1.25634479351750  | 7.97873296114835  | -1.21131572063468 |
| Si | -1.14444921799578 | 7.99224655457274  | -1.22284660955512 |
| Si | -2.32897589686497 | 5.94229896923481  | -1.25150609879685 |
| Si | -4.68683463708777 | 5.89785275797342  | -1.24190188034777 |
| Si | -5.43950990111164 | 3.63722056504758  | -1.23447752044371 |
| Si | -7.78522039422483 | 4.01434502196272  | -1.27992381208799 |
| Si | -9.15787782963948 | 2.06920220128711  | -1.33768861178605 |
| Si | 2.39416066669950  | 5.89697830061627  | -1.22251450052934 |
| Si | -1.21307390636102 | 3.86923390768733  | -1.23631367112601 |
| Si | -4.49580930642163 | 1.96311722353740  | -2.63265294440807 |
| Si | -7.88153686350838 | 0.07847639913240  | -1.34342859149728 |
| Si | 4.76701647282390  | 5.99956419407413  | -1.22763858589091 |
| Si | 1.13908949920691  | 3.88727068009356  | -1.25129048175774 |
| Si | -2.56028754673217 | 1.92490785025185  | -1.29447671107643 |
| Si | -5.52288017969397 | 0.29586824953645  | -1.32933427093167 |
| Si | -9.25466477396498 | -1.84319670551423 | -1.41547385423083 |
| Si | -8.14098607398105 | -3.94884913309264 | -1.42427417627292 |
| Si | -4.53036091487988 | -1.84991266939451 | -1.38914291732772 |
| Si | -1.22218647942893 | -0.02758200046316 | -1.26939370360492 |
| Si | 2.20530400450193  | 1.80080897728832  | -1.27595261695975 |
| Si | 5.75755592196344  | 3.84043544113123  | -1.21773716593408 |
| Si | 4.54475764360575  | 1.81338540160494  | -1.23970656149125 |
| Si | 1.12388314850531  | -0.27050707777595 | -1.33653770802220 |
| Si | -2.30957726640356 | -1.91137445477316 | -1.95985595407231 |
| Si | -5.78085138584129 | -3.84505190014001 | -1.39659491240178 |
| Si | 8.12493694114676  | 3.81171733246839  | -1.20623350550580 |
| Si | 9.23707144895380  | 1.69247698016768  | -1.20950668976949 |
| Si | 5.60084036945992  | -0.27196846910963 | -1.26176009440285 |
| Si | 2.11301941132748  | -2.04929681526960 | -2.44433167663210 |
| Si | -1.24704228047179 | -3.86519362874302 | -1.34966962985200 |
| Si | -4.77734067509653 | -5.98419974102285 | -1.41362690643054 |
| Si | 7.95467612731918  | -0.29944232545588 | -1.22784013223267 |
| Si | 4.16780564586564  | -2.12164879320811 | -1.37713126266275 |
| Si | 1.10865814433771  | -3.82113579117603 | -1.35939366691297 |
| Si | -2.41559299169360 | -5.90966255046040 | -1.36621549957924 |
| Si | 9.19104003590682  | -2.31146826632502 | -1.23652646475690 |
| Si | 5.47559300325804  | -4.07216894822429 | -1.28217514461843 |
| Si | 2.07143681597453  | -5.96656106686915 | -1.32148109556377 |

|                      |                   |                   |
|----------------------|-------------------|-------------------|
| Si -1.40067524024616 | -8.04229433728023 | -1.38450770639613 |
| Si 7.83674819561255  | -4.27766097662686 | -1.26038082640431 |
| Si 4.42571693057414  | -6.18873239883223 | -1.30475679087898 |
| Si 0.98213608016245  | -8.06305779595904 | -1.35533851680567 |
| Si 1.24732255734686  | 7.96148621590092  | 1.19203294482978  |
| Si -1.15210080604610 | 7.97756470107390  | 1.18441075132850  |
| Si -2.33731800062293 | 5.92805429929189  | 1.15949375062389  |
| Si -4.69322426583924 | 5.94444996140658  | 1.17031658331258  |
| Si -5.53672500013831 | 3.73812001785992  | 1.19792345531229  |
| Si -7.87701829903674 | 4.01509551035693  | 1.11200850318219  |
| Si -9.20072813735043 | 2.03938908475296  | 1.06511508692814  |
| Si 2.39006068342515  | 5.88393214851914  | 1.18055542451425  |
| Si -1.20032441822939 | 3.86926288210489  | 1.16194576978300  |
| Si -4.53382916690608 | 1.90596538384435  | 2.22527966705395  |
| Si -7.94743027170114 | 0.03536743906299  | 1.05134447949290  |
| Si 4.76034483888132  | 5.98808720600434  | 1.19960700878680  |
| Si 1.14836961817325  | 3.86984095876264  | 1.14909563588911  |
| Si -2.46893465216269 | 1.89450877277569  | 1.13973616791074  |
| Si -5.59987922031112 | 0.15089549592170  | 1.11981050273603  |
| Si -9.31279847317332 | -1.88801779975474 | 0.98835222841798  |
| Si -8.16900568505676 | -3.97626478653449 | 0.97719496809873  |
| Si -4.48593028300266 | -1.91658609953282 | 1.06361176409141  |
| Si -1.22794812540387 | -0.10096628865409 | 1.20306956490348  |
| Si 2.19445429548315  | 1.77443746658254  | 1.14247817734285  |
| Si 5.74354194825148  | 3.82596015257449  | 1.18287560710827  |
| Si 4.53373439987863  | 1.79650495242209  | 1.16053602982139  |
| Si 1.12158742196830  | -0.30413096399219 | 1.16290207172176  |
| Si -2.34072795459497 | -2.00150839895732 | 1.98335231706756  |
| Si -5.80577101585519 | -3.86562951327218 | 1.00848872357903  |
| Si 8.11033876707514  | 3.79570602081057  | 1.20361820542874  |
| Si 9.22199155450030  | 1.67632037276802  | 1.19623642102989  |
| Si 5.58443809820238  | -0.29109102544530 | 1.17218906616320  |
| Si 2.07804839438371  | -2.09286517468642 | 2.28584044182309  |
| Si -1.28034111180037 | -3.87189539001865 | 1.07504161101466  |
| Si -4.80483240438153 | -6.00748379186669 | 1.00048215247184  |
| Si 7.93922612557316  | -0.31599199846665 | 1.17344718400252  |
| Si 4.14528392129812  | -2.14258644032428 | 1.23673570183456  |
| Si 1.07983818245928  | -3.84314243523298 | 1.14566569221751  |
| Si -2.43903346337056 | -5.92798819219051 | 1.03163099217694  |
| Si 9.17268598357430  | -2.32982172088713 | 1.16772080333309  |
| Si 5.45519165879241  | -4.09104362916497 | 1.12506435372911  |
| Si 2.04813297528294  | -5.98764967876372 | 1.07935146390655  |
| Si -1.42816305581839 | -8.06324557419043 | 1.02180244478147  |
| Si 7.81669299065562  | -4.29568111889050 | 1.13974345938435  |

|    |                    |                   |                   |
|----|--------------------|-------------------|-------------------|
| Si | 4.40359635526743   | -6.20837813613768 | 1.10039948320071  |
| Si | 0.95610379435845   | -8.08362256726124 | 1.04817515131255  |
| H  | -1.69719173604251  | 9.07778787306743  | 2.04488303944452  |
| H  | -1.68049521458545  | 9.11319731903525  | -2.06130346897866 |
| H  | 5.41572969609224   | 7.03893201282339  | -2.09043471854204 |
| H  | 8.84360597500341   | 4.82719447678085  | -2.04177308014311 |
| H  | 8.39985798743866   | -5.38142725211046 | -2.10320014359084 |
| H  | 5.01920354025319   | -7.21664298576281 | -2.21938441512130 |
| H  | 1.59864191164381   | -9.12260755627852 | -2.21675761147722 |
| H  | -2.01717068257188  | -9.08550262141015 | -2.26569990170870 |
| H  | -5.39123712662161  | -6.99884272336160 | -2.33012986377961 |
| H  | -8.76045329765749  | -4.99252643406675 | -2.30301823997542 |
| H  | -8.27137064031348  | 5.14423425973806  | -2.13579980219520 |
| H  | -5.43393547140849  | 6.85157235652992  | -2.12352848803177 |
| H  | -5.41599582464539  | 6.92600868422146  | 2.04204789240662  |
| H  | -8.43231271324962  | 5.12375792230223  | 1.95379158568486  |
| H  | -8.79366809843734  | -5.04526433758042 | 1.82142469546029  |
| H  | -5.44868747109420  | -7.04252631293465 | 1.87272492307735  |
| H  | -2.06078039336966  | -9.12616483068267 | 1.86742098031183  |
| H  | 1.54913738007541   | -9.16205272672628 | 1.90272416380015  |
| H  | 4.98639925588070   | -7.24838720759878 | 2.00833542732342  |
| H  | 8.36808478869852   | -5.41132550405830 | 1.97475241728701  |
| H  | 8.81600133867250   | 4.80110207197905  | 2.06228542963377  |
| H  | 5.40045387760576   | 7.01948070906495  | 2.07848878332874  |
| H  | 1.83786610702867   | 9.08297749201462  | -2.04122727579483 |
| H  | 1.82115738786335   | 9.05028040814305  | 2.04756992818138  |
| H  | 10.45558088186073  | 1.67520110126914  | 2.04765130852047  |
| H  | 10.48144421296955  | 1.70093052005405  | -2.04484412582982 |
| H  | 10.37563115559886  | -2.43345010057741 | 2.05443822279804  |
| H  | 10.40709788331287  | -2.39717239691730 | -2.10698424251089 |
| H  | -10.42215368467148 | 2.07178916750134  | 1.93458845918767  |
| H  | -10.36495036430147 | 2.14076711431585  | -2.22383877964313 |
| H  | -10.55054944080298 | -1.88478414668952 | 1.83363764657372  |
| H  | -10.45815827420801 | -1.80077384221231 | -2.30745119010258 |
| H  | -4.47979495074128  | 1.82632613517832  | 3.72239726166207  |
| C  | -0.03906741836068  | 1.28604186657188  | 4.21061137961657  |
| O  | -1.12323492553032  | 0.43603185568063  | 3.82643116723084  |
| H  | 0.87452808145153   | 0.67345936596272  | 4.15010489707488  |
| H  | -2.39437942156951  | -2.06069401448653 | 3.47482984158529  |
| H  | -0.16025299044426  | 1.64776589691337  | 5.24913505844209  |
| H  | 0.06621146474997   | 2.15229524508072  | 3.52712700610180  |
| H  | -1.94947107867586  | 0.95737869755384  | 3.85344721163626  |

• 2Si-CH<sub>3</sub>-H-H<sub>2</sub>O

|    |                   |                   |                   |
|----|-------------------|-------------------|-------------------|
| Si | 1.17741998757180  | 7.96510015472424  | -1.14451782615544 |
| Si | -1.21395368336155 | 7.92081771652973  | -1.20345663898740 |
| Si | -2.34526145827331 | 5.84581876611307  | -1.27650545237411 |
| Si | -4.69666188425590 | 5.87866459592976  | -1.33032862999073 |
| Si | -5.48085875757246 | 3.64771228811592  | -1.36030021416733 |
| Si | -7.82934063930353 | 3.96897776664825  | -1.39135001013184 |
| Si | -9.18035845895429 | 2.01049654504182  | -1.44906698125766 |
| Si | 2.25241232596177  | 5.85860708562016  | -1.14960436675255 |
| Si | -1.32350575616151 | 3.73126301715214  | -1.34079602125024 |
| Si | -4.58554104651569 | 1.89794039738110  | -2.64734490501994 |
| Si | -7.92792179233420 | 0.00824454534454  | -1.45225915955595 |
| Si | 4.62520868040309  | 5.94016792216843  | -1.08266589031717 |
| Si | 1.02386390348183  | 3.83226814130552  | -1.21741975920371 |
| Si | -2.47546180819478 | 1.81945320065834  | -1.88130037673273 |
| Si | -5.56923359151162 | 0.14955475561014  | -1.43502729311943 |
| Si | -9.33207604452749 | -1.88808262346643 | -1.51945760732965 |
| Si | -8.21880227676522 | -3.99187389516274 | -1.53901890602360 |
| Si | -4.52210999078909 | -1.95681390266358 | -1.52288773627386 |
| Si | -1.35876653340894 | -0.16308465618454 | -1.35473028753562 |
| Si | 2.04145437659677  | 1.72415675600284  | -1.19816195471574 |
| Si | 5.61689696338437  | 3.78603501854475  | -1.05571235442755 |
| Si | 4.38626766839136  | 1.77326649450281  | -1.10572137952608 |
| Si | 1.00171235505821  | -0.38136050879353 | -1.32521331414186 |
| Si | -2.39726723307653 | -1.97249631500816 | -2.35163401689505 |
| Si | -5.86017924201709 | -3.87110125937349 | -1.52873360996490 |
| Si | 7.98167953533343  | 3.78945728508522  | -0.99555072626770 |
| Si | 9.07988113139571  | 1.66500974049887  | -0.99128635081616 |
| Si | 5.41813942852764  | -0.33022066960626 | -1.09166284757408 |
| Si | 1.98941578693656  | -2.08655810929159 | -2.59460496383816 |
| Si | -1.33786841539917 | -3.83743614093331 | -1.55884667838537 |
| Si | -4.83113862306485 | -5.99388694672750 | -1.55897180304046 |
| Si | 7.77406253810244  | -0.31224809059008 | -1.02969759356449 |
| Si | 3.97338764097493  | -2.15543915902212 | -1.41000997412924 |
| Si | 1.01806678120115  | -3.85131655151056 | -1.41424173833491 |
| Si | -2.46933851742309 | -5.88621124216100 | -1.53238546412657 |
| Si | 9.01958381272779  | -2.31664439270615 | -1.03689696206967 |
| Si | 5.30782800511326  | -4.07693687116956 | -1.14978455717238 |
| Si | 1.96390656526649  | -6.01903640232208 | -1.37627545182828 |
| Si | -1.50371573789285 | -8.04051925790072 | -1.51432668979401 |
| Si | 7.67130854078182  | -4.28422642560668 | -1.10409475382308 |
| Si | 4.31680403959202  | -6.22002567138849 | -1.26542948292870 |
| Si | 0.87767745835615  | -8.11337817920631 | -1.45575727231733 |

|    |                   |                   |                   |
|----|-------------------|-------------------|-------------------|
| Si | 1.11848855225333  | 7.92771548005786  | 1.25983737440628  |
| Si | -1.27044660274478 | 7.86985566825234  | 1.20378411891005  |
| Si | -2.38727363705497 | 5.78382395718754  | 1.12753304369122  |
| Si | -4.73881850748894 | 5.86013154394759  | 1.07629191507891  |
| Si | -5.54128890269747 | 3.64075012614101  | 1.05193028733651  |
| Si | -7.88295753525701 | 3.93397802024618  | 1.00439615961552  |
| Si | -9.22343369106436 | 1.97285051223937  | 0.95347964104792  |
| Si | 2.18316708837056  | 5.81745393919158  | 1.25355153174192  |
| Si | -1.41010274953990 | 3.64201933476856  | 1.10574104974598  |
| Si | -4.61410100480031 | 1.81309300174560  | 2.18159669942339  |
| Si | -7.96504897816649 | -0.02610008394025 | 0.94669819976546  |
| Si | 4.55459969445607  | 5.91051821006788  | 1.34425841522045  |
| Si | 0.93542230870098  | 3.80848802466046  | 1.16939583990007  |
| Si | -2.25562925072467 | 1.72845888862024  | 2.15443505858987  |
| Si | -5.60836323851975 | 0.06718667520131  | 0.97541990077159  |
| Si | -9.36113289419550 | -1.92878236362271 | 0.88479624953115  |
| Si | -8.23707856619724 | -4.02703470461476 | 0.85967669672649  |
| Si | -4.49128764723740 | -2.01183161210337 | 1.01074933811834  |
| Si | -1.47033338213991 | -0.21480973116558 | 1.06711136237408  |
| Si | 1.97396046802853  | 1.70899497037337  | 1.20317199254109  |
| Si | 5.55383843783531  | 3.76120111850737  | 1.34845764719246  |
| Si | 4.31803311538104  | 1.74859661927100  | 1.28494938008267  |
| Si | 0.89456872971151  | -0.36587084455150 | 1.12364658131830  |
| Si | -2.46709554483896 | -2.04860759139759 | 2.11539776713214  |
| Si | -5.87824379376630 | -3.90167928904515 | 0.88822516673618  |
| Si | 7.92003987585246  | 3.75599552915596  | 1.41266106734507  |
| Si | 9.03731461563434  | 1.63838467725006  | 1.41211866083191  |
| Si | 5.38022827224179  | -0.34375528977184 | 1.33942886591716  |
| Si | 1.79997219534752  | -2.18232395495303 | 2.22499203336096  |
| Si | -1.46089504554178 | -3.79874428036316 | 0.98892085697745  |
| Si | -4.86786288254214 | -6.03506060243419 | 0.84051985742748  |
| Si | 7.73664281911487  | -0.33983669696194 | 1.37326805531056  |
| Si | 3.98219876539577  | -2.21687762288996 | 1.51606319613480  |
| Si | 0.89406374573850  | -3.93682463205333 | 1.03199533314506  |
| Si | -2.50911452119795 | -5.89398942212836 | 0.88818093282387  |
| Si | 8.96315367974251  | -2.35929626655137 | 1.36502395453322  |
| Si | 5.27402519027033  | -4.15995030360265 | 1.26117259997561  |
| Si | 1.88651253042193  | -6.06552907405597 | 1.01913020242324  |
| Si | -1.56246878470477 | -8.06071367756939 | 0.88563924412240  |
| Si | 7.63287970135088  | -4.34362845121634 | 1.29467058311020  |
| Si | 4.23659093724984  | -6.27839619546149 | 1.13654743334898  |
| Si | 0.81312524596812  | -8.16466295143970 | 0.94820821493670  |
| H  | -1.90396186599397 | 8.92594327562511  | 2.05826329294612  |
| H  | -1.79442870813301 | 9.02267841436434  | -2.03730502103400 |

|   |                    |                   |                   |
|---|--------------------|-------------------|-------------------|
| H | 5.29843342200067   | 6.98557301946785  | -1.91932035438896 |
| H | 8.70943036467744   | 4.81326159072259  | -1.81278933503029 |
| H | 8.23445188811434   | -5.37983772516773 | -1.95705255868617 |
| H | 4.99999840862754   | -7.20118204794681 | -2.16823799582568 |
| H | 1.48019974289427   | -9.17307629495258 | -2.32697299126209 |
| H | -2.14068202537776  | -9.06857794879291 | -2.39885977624694 |
| H | -5.42216068070122  | -6.99693144392487 | -2.50181462854081 |
| H | -8.83281386002174  | -5.03461505888739 | -2.42215301956967 |
| H | -8.33850807043388  | 5.10248202980734  | -2.22875551963643 |
| H | -5.38305855715462  | 6.85558856540329  | -2.23375593240818 |
| H | -5.45541423000395  | 6.82938600793117  | 1.96476620313216  |
| H | -8.40923076783450  | 5.04968879670531  | 1.85407838761837  |
| H | -8.86411534734260  | -5.09573343586184 | 1.70198231320957  |
| H | -5.47141559324007  | -7.09009571397156 | 1.71625444734892  |
| H | -2.27006266033435  | -9.08299760150103 | 1.72179913749819  |
| H | 1.37569112697711   | -9.25343897794350 | 1.81010931464362  |
| H | 4.77511193328719   | -7.33917998386081 | 2.04744090134115  |
| H | 8.19706784673868   | -5.46332824027298 | 2.11514812833203  |
| H | 8.59911968215110   | 4.76027660877707  | 2.29385665918823  |
| H | 5.14769940942063   | 6.95199358620598  | 2.24429403836142  |
| H | 1.76883947158445   | 9.06688741668728  | -1.96989233370825 |
| H | 1.67217021275847   | 9.00048341739949  | 2.14728362276143  |
| H | 10.25973654930949  | 1.63667349066633  | 2.27938772873169  |
| H | 10.33266073978018  | 1.65405463575063  | -1.81378838941746 |
| H | 10.15460861273428  | -2.46647719547682 | 2.26711924035341  |
| H | 10.24869851680135  | -2.38512653351594 | -1.89042772334205 |
| H | -10.44941745996342 | 2.01419605570273  | 1.81511503683267  |
| H | -10.38220507235723 | 2.08673656526111  | -2.34145958310247 |
| H | -10.59280438513544 | -1.90174357630396 | 1.73839397081029  |
| H | -10.53967300802536 | -1.82505300120209 | -2.40458397205565 |
| H | -5.07810519988058  | 1.77123350389059  | 3.60709019659332  |
| C | -1.56598580680073  | 1.62538988723617  | 3.93775377476649  |
| H | -0.46035141994873  | 1.60265289979910  | 3.89962971363972  |
| H | -1.87580241184018  | 2.49601840623143  | 4.54202101590096  |
| H | -1.93034234438181  | 0.70631658294829  | 4.43184027068779  |
| H | 0.15419707211808   | -1.15330036850149 | 4.26364528839770  |
| O | 0.31438176762740   | -2.11508475028476 | 4.16960193026776  |
| H | -0.54142213569836  | -2.43754043538839 | 3.78726001402993  |

- **2Si-CH<sub>3</sub>-H**

|    |                   |                  |                   |
|----|-------------------|------------------|-------------------|
| Si | 1.18386027580372  | 7.96044575084296 | -1.12512708741252 |
| Si | -1.20615445434991 | 7.91757763442778 | -1.19130441896335 |
| Si | -2.33422523594318 | 5.84133938218809 | -1.27431629379044 |

|                      |                   |                   |
|----------------------|-------------------|-------------------|
| Si -4.68501090235331 | 5.87696061497383  | -1.33327177721470 |
| Si -5.47381306044551 | 3.64728756541081  | -1.36591455963517 |
| Si -7.82093222654186 | 3.97130544219917  | -1.41285277230398 |
| Si -9.16834593497680 | 2.01096043379905  | -1.47882335821155 |
| Si 2.25507091140796  | 5.85218503092510  | -1.12765285766608 |
| Si -1.32066884461854 | 3.72271874096184  | -1.33059754422023 |
| Si -4.57258471072807 | 1.89092409399087  | -2.63773897530661 |
| Si -7.91857722942752 | 0.00633582267229  | -1.47085055553032 |
| Si 4.62547730908654  | 5.94295359936593  | -1.06908407193914 |
| Si 1.02323049985350  | 3.82923230446724  | -1.19428107162885 |
| Si -2.46850748127981 | 1.80831716558641  | -1.86246208050981 |
| Si -5.55934924996925 | 0.13284482487319  | -1.44037894959546 |
| Si -9.32248963159511 | -1.88879239968603 | -1.54650105081554 |
| Si -8.19466443648964 | -3.98452039721614 | -1.56096957807477 |
| Si -4.47218584685113 | -1.95729128390291 | -1.52568745150646 |
| Si -1.39352422334565 | -0.19058576064659 | -1.31155546531397 |
| Si 2.03425037860737  | 1.72210671606995  | -1.19448179577352 |
| Si 5.61267466041003  | 3.78814546390696  | -1.05911644798915 |
| Si 4.37600894275840  | 1.77830610357535  | -1.12341656297249 |
| Si 0.96900470287603  | -0.35284927580225 | -1.29139083720882 |
| Si -2.37373579194836 | -1.96553983975620 | -2.43851456789008 |
| Si -5.83540554488666 | -3.85621539963601 | -1.53813406982355 |
| Si 7.97822021913496  | 3.79416915915751  | -1.00257883191917 |
| Si 9.09076903634869  | 1.67882386707800  | -1.00601059447450 |
| Si 5.42977616700563  | -0.31112287083557 | -1.15171442605301 |
| Si 1.97039268825135  | -2.09961582600104 | -2.45546988224225 |
| Si -1.37732095663734 | -3.80085783701858 | -1.47875120451619 |
| Si -4.82355960418458 | -5.98852727865326 | -1.53908854628493 |
| Si 7.78328179237858  | -0.29520504672135 | -1.07420227464712 |
| Si 4.04418222391376  | -2.16633989920676 | -1.47557536559687 |
| Si 0.97685905796824  | -3.88784286334654 | -1.36563742149521 |
| Si -2.46281843125343 | -5.87618907180560 | -1.49803787075489 |
| Si 9.02235653621469  | -2.30525139982449 | -1.08031807274083 |
| Si 5.33822201812712  | -4.10640311054535 | -1.22138047148540 |
| Si 1.95343368441238  | -6.02868939031365 | -1.34934897435886 |
| Si -1.50682824220885 | -8.03619393673894 | -1.49122248883127 |
| Si 7.70007926033023  | -4.29158402882958 | -1.15410358929757 |
| Si 4.30763086091645  | -6.23198629206697 | -1.28770929018818 |
| Si 0.87250799658790  | -8.12505250714804 | -1.42720986605110 |
| Si 1.12010617828244  | 7.91981173435816  | 1.27934972060565  |
| Si -1.26843460524743 | 7.86080325875838  | 1.21571316323794  |
| Si -2.38074513087095 | 5.77340501549152  | 1.12927986124327  |
| Si -4.73322510704387 | 5.85701249221533  | 1.07390277957022  |
| Si -5.54732291247131 | 3.64257389240191  | 1.04523327071808  |

|    |                   |                   |                   |
|----|-------------------|-------------------|-------------------|
| Si | -7.88857551534629 | 3.93720439429917  | 0.98286941268559  |
| Si | -9.22874175002027 | 1.97530291501828  | 0.92323769314183  |
| Si | 2.18379950472240  | 5.80826115492551  | 1.27448575071725  |
| Si | -1.40811267031122 | 3.62834367637977  | 1.11610497770771  |
| Si | -4.62546178551463 | 1.81373186602520  | 2.17550611277068  |
| Si | -7.97304919127974 | -0.02519530938513 | 0.92801900757306  |
| Si | 4.55328907125039  | 5.89949664705034  | 1.35898661465480  |
| Si | 0.93862675168826  | 3.79501679895917  | 1.19287838643264  |
| Si | -2.26635637041236 | 1.73180920598202  | 2.18419787450826  |
| Si | -5.61684647438686 | 0.06739755447595  | 0.96824019944890  |
| Si | -9.36606732934692 | -1.93031530843173 | 0.85719663057724  |
| Si | -8.23431932177849 | -4.02441056705667 | 0.83639476187164  |
| Si | -4.49763530635786 | -2.00626614239766 | 1.03066689901063  |
| Si | -1.46301420287241 | -0.21583705923726 | 1.11714644263744  |
| Si | 1.96299790036236  | 1.68740626078910  | 1.22421176178930  |
| Si | 5.54799178443001  | 3.74845094982827  | 1.34156652787818  |
| Si | 4.30770275720178  | 1.73953939020959  | 1.27235993370698  |
| Si | 0.90083010308409  | -0.39833912942269 | 1.18500626199179  |
| Si | -2.47525995357315 | -2.05708415969353 | 2.11816641407372  |
| Si | -5.87734684352154 | -3.89153210107179 | 0.88565602497351  |
| Si | 7.91363468427269  | 3.75355026413139  | 1.40675504040608  |
| Si | 9.02567970677012  | 1.63688333225253  | 1.39780646925782  |
| Si | 5.36412294961923  | -0.35165016678962 | 1.29054489180273  |
| Si | 1.84448137850056  | -2.19766234324239 | 2.31286065754023  |
| Si | -1.44951028664903 | -3.82730693373452 | 1.06544445468204  |
| Si | -4.87431876141331 | -6.02818957665166 | 0.85889903700191  |
| Si | 7.71964323075487  | -0.33781442026202 | 1.32466064511439  |
| Si | 3.97002657522987  | -2.22164006578663 | 1.45719196577770  |
| Si | 0.90866220389327  | -3.93303503505758 | 1.09322435716642  |
| Si | -2.51529894629740 | -5.90937237551053 | 0.92296991863761  |
| Si | 8.95529685769700  | -2.35085893872058 | 1.32274939327265  |
| Si | 5.27395267502221  | -4.15266938480295 | 1.18891557034595  |
| Si | 1.88659812359795  | -6.07452548929588 | 1.04928580146616  |
| Si | -1.56926772676428 | -8.07404992878446 | 0.90919877703148  |
| Si | 7.63485653060306  | -4.33854933095098 | 1.24309353847387  |
| Si | 4.24057983456624  | -6.27779934628039 | 1.11376214651421  |
| Si | 0.80851295199189  | -8.17355351264305 | 0.97544324594033  |
| H  | -1.90282302515610 | 8.91462164135542  | 2.07226274935736  |
| H  | -1.78262463576190 | 9.02103582281771  | -2.02569680036928 |
| H  | 5.29143074037894  | 6.99464470131265  | -1.90358458273593 |
| H  | 8.69840249773486  | 4.82583684598038  | -1.81647045006352 |
| H  | 8.29189076874030  | -5.37810602052260 | -1.99890329805102 |
| H  | 4.94655603226914  | -7.23419175245726 | -2.19972310015535 |
| H  | 1.48379640260963  | -9.17862219861507 | -2.29965246555741 |



|   |                    |                   |                   |
|---|--------------------|-------------------|-------------------|
| H | -2.14653827880670  | -9.05393554316047 | -2.38558550958773 |
| H | -5.41018289354045  | -6.99675474933778 | -2.47902847446860 |
| H | -8.79545595054520  | -5.03121858333321 | -2.44859548636991 |
| H | -8.32447197601012  | 5.10429249146755  | -2.25435347036098 |
| H | -5.36547442141347  | 6.85659301925687  | -2.23828412307935 |
| H | -5.44346289153344  | 6.83169504971192  | 1.96156511744541  |
| H | -8.42137871563302  | 5.05269521698547  | 1.82877649971140  |
| H | -8.86202604008940  | -5.09902429603386 | 1.67057959011124  |
| H | -5.50165291266955  | -7.06810304835745 | 1.73593301100556  |
| H | -2.26814118226776  | -9.10989908782279 | 1.73596582629030  |
| H | 1.36888971699609   | -9.26492843920088 | 1.83553077202247  |
| H | 4.82978617319044   | -7.31544216650590 | 2.01970521931283  |
| H | 8.18271130481941   | -5.45710738042076 | 2.07590531687456  |
| H | 8.59220603602783   | 4.75424561726868  | 2.29214242709338  |
| H | 5.15970489578929   | 6.92762804837729  | 2.26529686738361  |
| H | 1.78464347860482   | 9.05834544445297  | -1.94876108116635 |
| H | 1.67182812672640   | 8.99143055958743  | 2.16936096315275  |
| H | 10.23859237552609  | 1.61431843091869  | 2.27784147949625  |
| H | 10.34974413908582  | 1.68258841345926  | -1.81877508309106 |
| H | 10.14080237153536  | -2.44930014800436 | 2.23340819432934  |
| H | 10.25664181239073  | -2.36603147371744 | -1.92704328049551 |
| H | -10.46146430826025 | 2.01993497353734  | 1.77505554925107  |
| H | -10.36456756082805 | 2.08648672312024  | -2.37888246199527 |
| H | -10.60164964085625 | -1.90817645496475 | 1.70528648889290  |
| H | -10.52427091781150 | -1.82996135913117 | -2.43978820256352 |
| H | -5.10122239972877  | 1.76951800793281  | 3.59710011616805  |
| C | -1.61035296575423  | 1.68039994706505  | 3.97800659650671  |
| H | -0.50530824842679  | 1.65717980752843  | 3.96655393782065  |
| H | -1.93982224520878  | 2.56878606866234  | 4.54519973633657  |
| H | -1.97700440654381  | 0.77419769167488  | 4.49135238982439  |

• **2Si...CH<sub>4</sub>**

|    |                   |                  |                   |
|----|-------------------|------------------|-------------------|
| Si | 1.05261059373387  | 7.85754097705899 | -1.20279829756214 |
| Si | -1.32715200575466 | 7.76432688483759 | -1.40117568291251 |
| Si | -2.19620757740568 | 5.57472279498353 | -1.67071115009029 |
| Si | -4.55585198961978 | 5.86426029897676 | -1.76658285342327 |
| Si | -5.68692751058857 | 3.89014384635203 | -2.27103012316441 |
| Si | -7.97259339513161 | 3.96063812195265 | -1.68159808289669 |
| Si | -9.28139629791622 | 1.99479797227018 | -1.59322127975616 |
| Si | 2.09101105930708  | 5.73232773895119 | -1.16905155708504 |
| Si | -1.24925095872114 | 3.70133697129871 | -2.79606926904300 |
| Si | -4.53364783972204 | 2.25944424692458 | -1.13628891441238 |
| Si | -7.92299979244972 | 0.08733580447370 | -1.33611158441035 |

|    |                   |                   |                   |
|----|-------------------|-------------------|-------------------|
| Si | 4.43934279485780  | 5.94527092629862  | -0.95285887472931 |
| Si | 0.69558336075846  | 3.83276736620128  | -1.43057592434324 |
| Si | -2.16029810584342 | 2.35109031523703  | -1.05302814266001 |
| Si | -5.62063254566759 | 0.20553281078023  | -0.94218880580293 |
| Si | -9.31279118378442 | -1.80385687880767 | -1.63206920038229 |
| Si | -8.17822469511711 | -3.88378631990625 | -1.63769725906797 |
| Si | -4.45621325648376 | -1.80565131061068 | -1.18874414611449 |
| Si | -1.49255193658750 | 0.05490493002411  | -1.01041922590625 |
| Si | 1.92225318945789  | 1.83673932159883  | -1.20329559672655 |
| Si | 5.50627506784997  | 3.83295062752197  | -0.92914581506319 |
| Si | 4.25808285613469  | 1.84278403864332  | -1.08795701780966 |
| Si | 0.86085264289800  | -0.23354591018944 | -1.11918417755885 |
| Si | -2.42828760648885 | -1.68996134747267 | -2.24339676215029 |
| Si | -5.84616567701151 | -3.68241734010456 | -1.36671849059262 |
| Si | 7.86599284283080  | 3.86876888386762  | -0.81530658390438 |
| Si | 8.98925288497264  | 1.76194471224926  | -0.81844383518587 |
| Si | 5.32568595452831  | -0.23401180162690 | -1.08305319473244 |
| Si | 1.81595937105542  | -1.98782898086020 | -2.31083971965373 |
| Si | -1.48828538780063 | -3.59231702449331 | -1.28897713977623 |
| Si | -4.87808817647546 | -5.82638396400416 | -1.54876318108660 |
| Si | 7.67750929591002  | -0.20725484024470 | -0.94851503849987 |
| Si | 3.92551367671973  | -2.08105042451045 | -1.39432491298881 |
| Si | 0.85812533443511  | -3.76970223467114 | -1.19977040074498 |
| Si | -2.52979615731604 | -5.69838580312048 | -1.46113804924960 |
| Si | 8.91708346440183  | -2.21663702401949 | -0.94786877864185 |
| Si | 5.23453728347612  | -4.02275523331843 | -1.16718918257534 |
| Si | 1.84040531047335  | -5.89933158476953 | -1.27066514830130 |
| Si | -1.58333003015464 | -7.86537151417370 | -1.58932327168301 |
| Si | 7.59605483282108  | -4.20010506662972 | -1.07997228403124 |
| Si | 4.19061643041451  | -6.13669279876443 | -1.24587939695800 |
| Si | 0.78567414045541  | -7.99618880353772 | -1.45854333054521 |
| Si | 0.88169896601443  | 7.80675917343323  | 1.19124438213656  |
| Si | -1.47857572513639 | 7.63963244010391  | 0.99229681798027  |
| Si | -2.40275070055968 | 5.48959789068497  | 0.73338428782900  |
| Si | -4.72699429611229 | 5.54001952881171  | 0.62571039396725  |
| Si | -5.42236196526257 | 3.29659272949429  | 0.87651056810831  |
| Si | -7.73031188691945 | 3.70873378475369  | 0.68040659413606  |
| Si | -9.36652367680864 | 1.99600138030810  | 0.80875062279983  |
| Si | 1.89033069531431  | 5.67288786697205  | 1.22015238976748  |
| Si | -1.67229525613475 | 3.34745893145845  | 1.18976897326817  |
| Si | -4.97270445530287 | 1.80988175079042  | 2.65189492486915  |
| Si | -8.24661948348415 | -0.06390932175614 | 1.04252819603725  |
| Si | 4.24749645129333  | 5.83972643127376  | 1.46355981721342  |
| Si | 0.60512267511402  | 3.69635453881910  | 0.99365163267199  |

|    |                   |                   |                   |
|----|-------------------|-------------------|-------------------|
| Si | -2.76499309244069 | 1.56400394996296  | 2.06621690178987  |
| Si | -5.89637670036835 | -0.00638720815715 | 1.43263935781163  |
| Si | -9.60873312804261 | -1.96223762000588 | 0.74975204105115  |
| Si | -8.42033870292625 | -4.03473202459228 | 0.74610123895687  |
| Si | -4.72096972253094 | -2.04855161814044 | 1.35441710628080  |
| Si | -1.59260982138369 | -0.34146884127713 | 1.40113182747441  |
| Si | 1.80023634372537  | 1.72283105723985  | 1.24587086915406  |
| Si | 5.37481718085463  | 3.76187936722330  | 1.46641575716425  |
| Si | 4.13403420066126  | 1.76613298355593  | 1.32159650795511  |
| Si | 0.77863189457662  | -0.38119805419004 | 1.33717257853721  |
| Si | -2.63891040282825 | -2.17249987267372 | 2.33162788375442  |
| Si | -6.07352790913119 | -3.93649329741459 | 1.02596237322149  |
| Si | 7.73856079960861  | 3.80135473444678  | 1.59184516488659  |
| Si | 8.86163364980231  | 1.69077677222308  | 1.58246236572635  |
| Si | 5.20044318964241  | -0.31634908631701 | 1.35813302379808  |
| Si | 1.74575493855143  | -2.16126404521819 | 2.49323128640251  |
| Si | -1.56940946169361 | -3.87096415433494 | 1.22985109095086  |
| Si | -5.03205349074950 | -6.04555154569535 | 0.83625907172902  |
| Si | 7.55305315409248  | -0.27787746106097 | 1.44633064729459  |
| Si | 3.82324416352539  | -2.19282669447655 | 1.52353862877013  |
| Si | 0.79349123099060  | -3.89220032506077 | 1.25017996165777  |
| Si | -2.66997769804010 | -5.91032705750060 | 0.94064714456544  |
| Si | 8.78891255670609  | -2.29258971845227 | 1.45126101551047  |
| Si | 5.13126408670132  | -4.11552336671922 | 1.23823335457721  |
| Si | 1.75474154809890  | -6.04758448351877 | 1.12434345676201  |
| Si | -1.71933346606008 | -8.06209750783855 | 0.80092406011778  |
| Si | 7.49142483847935  | -4.29307063058678 | 1.31583994169000  |
| Si | 4.11070989624865  | -6.24847328212868 | 1.15353597426683  |
| Si | 0.65973420381985  | -8.13641609241907 | 0.93878032773506  |
| H  | -2.29799414678951 | 8.54320655748055  | 1.86116400283889  |
| H  | -1.91714945664863 | 8.88214943458230  | -2.20622770678866 |
| H  | 5.10999893685975  | 7.03975357495803  | -1.72628448376076 |
| H  | 8.59050939594363  | 4.91995411355561  | -1.59945025089492 |
| H  | 8.19839113086556  | -5.27150584846955 | -1.93673079728146 |
| H  | 4.77733612139776  | -7.14451608447662 | -2.18644687896663 |
| H  | 1.42565922833634  | -9.01090175454907 | -2.35589828545044 |
| H  | -2.22322867322234 | -8.80016965764909 | -2.57008440447806 |
| H  | -5.49769248707760 | -6.71031699797321 | -2.58781103891979 |
| H  | -8.65590043328454 | -4.89577106342588 | -2.63294314764108 |
| H  | -8.62622283912655 | 5.19771167797364  | -2.21011165263989 |
| H  | -5.18856906560603 | 7.08324499301984  | -2.36322622310570 |
| H  | -5.51345415297753 | 6.49680320315629  | 1.46837172196165  |
| H  | -8.06824925118947 | 4.90556711789068  | 1.51658957144606  |
| H  | -9.13730453680367 | -5.14025725449410 | 1.45928836589638  |

|   |                    |                   |                   |
|---|--------------------|-------------------|-------------------|
| H | -5.62906235958326  | -7.17938552592749 | 1.61248274687009  |
| H | -2.41798168629060  | -9.16558822455330 | 1.53553361842851  |
| H | 1.18913674263366   | -9.26650979287092 | 1.76839026875288  |
| H | 4.73851876253324   | -7.28315410199347 | 2.03691298052816  |
| H | 8.04336943876303   | -5.41899013124264 | 2.13611901320826  |
| H | 8.38519236517471   | 4.79216817390294  | 2.51154651620651  |
| H | 4.71537926575497   | 6.88450550769566  | 2.43136354472550  |
| H | 1.70761971143018   | 8.95093901887345  | -1.99060244403047 |
| H | 1.37118378096698   | 8.84826882534807  | 2.15110730629835  |
| H | 10.04997967252743  | 1.65692398580595  | 2.49498480234534  |
| H | 10.26931874381660  | 1.77192469829444  | -1.59728214819823 |
| H | 9.95252323142850   | -2.39220546231587 | 2.38959635288217  |
| H | 10.17326801775174  | -2.26688215070681 | -1.76259204982240 |
| H | -10.53769813104268 | 2.40949332007984  | 1.64861179574274  |
| H | -10.42134115610490 | 1.84477577160052  | -2.55119514741753 |
| H | -10.92480171782170 | -2.03776788851489 | 1.46246106225457  |
| H | -10.40921997405948 | -1.63724054488729 | -2.63925209259287 |
| H | -1.31582038958910  | 1.01236907843977  | 4.83562393936555  |
| C | -0.24191971402460  | 1.15367379753920  | 4.62941785270967  |
| H | -0.11643689796941  | 1.86023194582766  | 3.79093817926460  |
| H | 0.25562650366360   | 1.55675658289720  | 5.52619863489355  |
| H | 0.20714013600693   | 0.18441571844152  | 4.35676759721512  |

## Transition states

- TS 2Si...CO<sub>2</sub> → 2Si-CO<sub>2</sub>

|    |                   |                   |                   |
|----|-------------------|-------------------|-------------------|
| Si | 1.17941613082911  | 8.08380649722668  | -1.25430629140518 |
| Si | -1.22402455860672 | 8.09134898652245  | -1.25682942279441 |
| Si | -2.43838722385297 | 6.05383712670830  | -1.26032527488796 |
| Si | -4.80675807844458 | 6.25990157441704  | -1.27129831474197 |
| Si | -5.88725586778120 | 4.13954275627847  | -1.26340920259327 |
| Si | -8.26307105563553 | 4.11842140695338  | -1.29222003821536 |
| Si | -9.41863494935017 | 2.01605904691894  | -1.29920917856258 |
| Si | 2.38164410300859  | 6.04067517704797  | -1.25809006648656 |
| Si | -1.20481064996094 | 4.03602102034785  | -1.24992598681816 |
| Si | -4.72981778496759 | 2.08138790121385  | -1.23843402094787 |
| Si | -8.17743324013053 | -0.00164799490166 | -1.28404716862652 |
| Si | 4.75596328704506  | 6.22509125718134  | -1.27238807585546 |
| Si | 1.16050757981364  | 4.01782146259195  | -1.26201472933868 |
| Si | -2.37615293451949 | 1.99078243976146  | -1.30670406090918 |
| Si | -5.82915114700993 | -0.00105019558688 | -1.26168417178614 |

|    |                   |                   |                   |
|----|-------------------|-------------------|-------------------|
| Si | -9.41746701657810 | -2.02006955024470 | -1.29943131617494 |
| Si | -8.26069345024877 | -4.12177408935001 | -1.29269257046477 |
| Si | -4.72857878219475 | -2.08281826523955 | -1.23870003055836 |
| Si | -1.15862728482999 | 0.00013627674351  | -1.23471745627578 |
| Si | 2.39905247077459  | 2.02000314718865  | -1.26666669166210 |
| Si | 5.87526806303346  | 4.12371962720344  | -1.27290276674108 |
| Si | 4.75063860569237  | 2.04810979730989  | -1.27154461747499 |
| Si | 1.18181856987277  | -0.00016431537318 | -1.23092006903455 |
| Si | -2.37495789720503 | -1.99131928083774 | -1.30667762465107 |
| Si | -5.88487834151953 | -4.14159957976287 | -1.26392628177183 |
| Si | 8.24948438461229  | 4.12840994728984  | -1.28996380719885 |
| Si | 9.46400635538429  | 2.05271865573505  | -1.29692067812503 |
| Si | 5.92254834918919  | 0.00103276817726  | -1.28167588328372 |
| Si | 2.40034701945391  | -2.01958098483734 | -1.26718157024211 |
| Si | -1.20262178257972 | -4.03604813137956 | -1.25053768382579 |
| Si | -4.80345331379909 | -6.26148477681269 | -1.27210156607564 |
| Si | 8.27526147991526  | 0.00165563759680  | -1.29037934114777 |
| Si | 4.75196266625082  | -2.04679858467437 | -1.27195724835602 |
| Si | 1.16270314338261  | -4.01794329881795 | -1.26267008600504 |
| Si | -2.43518903520905 | -6.05446879012454 | -1.26117253465348 |
| Si | 9.46516268496176  | -2.04874685593341 | -1.29733761704493 |
| Si | 5.87766698596906  | -4.12183810924799 | -1.27372887005124 |
| Si | 2.38481365532242  | -6.04022935603765 | -1.25914982948186 |
| Si | -1.22025173200067 | -8.09164231480222 | -1.25804749810459 |
| Si | 8.25189852220463  | -4.12518408564767 | -1.29078315734272 |
| Si | 4.75923798458394  | -6.22368657326359 | -1.27355734405268 |
| Si | 1.18319407702960  | -8.08373070186752 | -1.25561644948226 |
| Si | 1.17922889211585  | 8.07562732814470  | 1.14974498381815  |
| Si | -1.22647577439823 | 8.08808802865375  | 1.14794065860185  |
| Si | -2.44452984008170 | 6.05305430767227  | 1.14516689540975  |
| Si | -4.81606630341750 | 6.26438128031747  | 1.14876884180037  |
| Si | -5.91814895803724 | 4.15530084307957  | 1.14070091287816  |
| Si | -8.29060691357809 | 4.13000656004117  | 1.10757326832957  |
| Si | -9.43740895304591 | 2.01924291839731  | 1.10682112439883  |
| Si | 2.38401451032745  | 6.03239882937607  | 1.14403526388405  |
| Si | -1.21113195557847 | 4.03569650365160  | 1.15401847184974  |
| Si | -4.76516898791695 | 2.09918654309707  | 1.17141530612064  |
| Si | -8.19646903062134 | -0.00178979963382 | 1.12239201439130  |
| Si | 4.76121152020417  | 6.21917120051776  | 1.14973838916444  |
| Si | 1.15989035753802  | 4.00691485555562  | 1.15416754018311  |
| Si | -2.41796252087796 | 2.01420986671194  | 1.10062311506223  |
| Si | -5.84470555367248 | -0.00119995334596 | 1.14787184589450  |
| Si | -9.43621470545475 | -2.02354174395446 | 1.10659786265924  |
| Si | -8.28817486540817 | -4.13364037051289 | 1.10710900010858  |

|    |                   |                   |                   |
|----|-------------------|-------------------|-------------------|
| Si | -4.76385860874966 | -2.10093173373167 | 1.17112275912320  |
| Si | -1.24307279029942 | -0.00003616648931 | 1.30404856795743  |
| Si | 2.42050831797504  | 2.01669124421631  | 1.12766584633836  |
| Si | 5.89163711607362  | 4.12331083748636  | 1.12828463734956  |
| Si | 4.76927450084109  | 2.04999878061895  | 1.13739474899022  |
| Si | 1.20715436195556  | -0.00048654700866 | 1.18110042040506  |
| Si | -2.41665541258399 | -2.01507376972189 | 1.10050729257146  |
| Si | -5.91571195224609 | -4.15767846714496 | 1.14019072327094  |
| Si | 8.26558023422297  | 4.13090175352865  | 1.11198284332552  |
| Si | 9.47767361272346  | 2.05296192496609  | 1.10690813320612  |
| Si | 5.93529876292996  | 0.00081135240774  | 1.13234113453113  |
| Si | 2.42189860297072  | -2.01673268385494 | 1.12716440208593  |
| Si | -1.20887468549292 | -4.03607970567106 | 1.15345049105560  |
| Si | -4.81270522092231 | -6.26628708736126 | 1.14795177949649  |
| Si | 8.28802733354599  | 0.00142659757800  | 1.11382150487259  |
| Si | 4.77064398999237  | -2.04912963696760 | 1.13696057881626  |
| Si | 1.16216400995965  | -4.00746387691626 | 1.15347384167792  |
| Si | -2.44127380920243 | -6.05404434849211 | 1.14432204749473  |
| Si | 9.47884860677185  | -2.04944358575761 | 1.10649223309948  |
| Si | 5.89406752944377  | -4.12185581164338 | 1.12745268351971  |
| Si | 2.38727220912924  | -6.03234291114953 | 1.14299319625823  |
| Si | -1.22263288214229 | -8.08873299503957 | 1.14672323611559  |
| Si | 8.26801384668509  | -4.12811503096781 | 1.11115688336727  |
| Si | 4.76455577072064  | -6.21820760078513 | 1.14857569789616  |
| Si | 1.18307040138877  | -8.07590360754984 | 1.14843761188902  |
| H  | -1.76829821742748 | 9.20926462603508  | 1.98276233631510  |
| H  | -1.77128597664368 | 9.20951626421830  | -2.09198285901653 |
| H  | 5.33820767570442  | 7.30780806905566  | -2.12919218476986 |
| H  | 8.93029016871434  | 5.16732231248641  | -2.12906172687077 |
| H  | 8.93332022288638  | -5.16353349102839 | -2.13007640137162 |
| H  | 5.34188915848214  | -7.30607273370863 | -2.13050553566747 |
| H  | 1.73454989671958  | -9.19895738329145 | -2.09198230420234 |
| H  | -1.76734726123788 | -9.20981205919537 | -2.09330954842683 |
| H  | -5.39754065275787 | -7.33393174851277 | -2.13332325473155 |
| H  | -8.94609758185722 | -5.14651537105446 | -2.14477465028924 |
| H  | -8.94899670775150 | 5.14289786205848  | -2.14419871190178 |
| H  | -5.40126379233756 | 7.33226006130507  | -2.13234268128198 |
| H  | -5.40336108397709 | 7.34838693428446  | 2.00007502982500  |
| H  | -9.00961425716486 | 5.15445756305346  | 1.93167886851591  |
| H  | -9.00664832016392 | -5.15854504901402 | 1.93111815929903  |
| H  | -5.39954367482252 | -7.35060420500275 | 1.99917263489095  |
| H  | -1.76419158771472 | -9.21018699500146 | 1.98134542645004  |
| H  | 1.72897222903052  | -9.18920136566489 | 1.99102919784273  |
| H  | 5.35186458184314  | -7.29757746601200 | 2.00618022357349  |

|   |                    |                   |                   |
|---|--------------------|-------------------|-------------------|
| H | 8.96333248391153   | -5.16830230674335 | 1.93658293768730  |
| H | 8.96032432784314   | 5.17131509480155  | 1.93761057028683  |
| H | 5.34805706596999   | 7.29857539973286  | 2.00761596721253  |
| H | 1.73059300774022   | 9.19929818249542  | -2.09043897469201 |
| H | 1.72489478382751   | 9.18893671600518  | 1.99247754540043  |
| C | 0.28467211030819   | -0.00096226541472 | 3.39062091469899  |
| O | 1.25147249031801   | -0.00201579772581 | 4.09027222175231  |
| O | -0.95784795651383  | 0.00002097219601  | 3.38636929892083  |
| H | -10.64974335981598 | -2.05983701218154 | -2.15200802817012 |
| H | -10.68323765149666 | -2.07082241668526 | 1.93722351861276  |
| H | -10.68447456466540 | 2.06569457946862  | 1.93742894526504  |
| H | -10.65093289056522 | 2.05522558524029  | -2.15178166673550 |
| H | 10.72413131631648  | -2.13032598788075 | 1.93691086140505  |
| H | 10.72288865335407  | 2.13441296356016  | 1.93737235855195  |
| H | 10.70049876256933  | -2.13073591578816 | -2.14246609744281 |
| H | 10.69928384568205  | 2.13560158591905  | -2.14204658695185 |

• **TS 2Si-CO<sub>2</sub> + H<sub>2</sub> → 2Si-COOH**

|    |             |             |            |
|----|-------------|-------------|------------|
| Si | -1.14220000 | -7.97290000 | 1.06930000 |
| Si | 1.25000000  | -8.01310000 | 1.06770000 |
| Si | 2.44110000  | -5.96700000 | 1.08740000 |
| Si | 4.79960000  | -6.22080000 | 1.20660000 |
| Si | 5.93520000  | -4.13350000 | 1.27190000 |
| Si | 8.30700000  | -4.11270000 | 1.46060000 |
| Si | 9.50000000  | -2.02930000 | 1.51460000 |
| Si | -2.31860000 | -5.91890000 | 1.14090000 |
| Si | 1.22080000  | -3.95090000 | 1.00350000 |
| Si | 4.81920000  | -2.04590000 | 1.15300000 |
| Si | 8.30490000  | 0.01410000  | 1.41590000 |
| Si | -4.68690000 | -6.12310000 | 1.23920000 |
| Si | -1.12700000 | -3.89270000 | 1.14620000 |
| Si | 2.46330000  | -1.96320000 | 0.98400000 |
| Si | 5.96930000  | -0.00110000 | 1.23840000 |
| Si | 9.47900000  | 2.06870000  | 1.50550000 |
| Si | 8.25980000  | 4.13640000  | 1.44750000 |
| Si | 4.80260000  | 2.02940000  | 1.13570000 |
| Si | 1.12430000  | -0.03200000 | 0.69200000 |
| Si | -2.51640000 | -2.06040000 | 1.00440000 |
| Si | -5.91830000 | -4.08460000 | 1.28380000 |
| Si | -4.82800000 | -1.98300000 | 1.26730000 |
| Si | -1.19740000 | -0.11480000 | 0.81590000 |
| Si | 2.44470000  | 1.91750000  | 0.96220000 |
| Si | 5.88940000  | 4.12890000  | 1.25180000 |

|    |             |             |             |
|----|-------------|-------------|-------------|
| Si | -8.28580000 | -4.06170000 | 1.49110000  |
| Si | -9.53550000 | -2.00400000 | 1.53910000  |
| Si | -6.04520000 | 0.03690000  | 1.23530000  |
| Si | -2.43010000 | 1.90370000  | 0.97500000  |
| Si | 1.19510000  | 3.89940000  | 1.00550000  |
| Si | 4.73780000  | 6.20740000  | 1.19220000  |
| Si | -8.38620000 | 0.06370000  | 1.42460000  |
| Si | -4.77910000 | 2.00880000  | 1.13610000  |
| Si | -1.15160000 | 3.86710000  | 1.01510000  |
| Si | 2.38390000  | 5.93510000  | 1.07870000  |
| Si | -9.52410000 | 2.14200000  | 1.49720000  |
| Si | -5.87110000 | 4.10440000  | 1.22580000  |
| Si | -2.34990000 | 5.90040000  | 1.06400000  |
| Si | 1.20020000  | 7.98680000  | 1.07840000  |
| Si | -8.23860000 | 4.16740000  | 1.41250000  |
| Si | -4.70500000 | 6.16980000  | 1.16050000  |
| Si | -1.18920000 | 7.96510000  | 1.07090000  |
| Si | -1.15140000 | -7.87340000 | -1.33170000 |
| Si | 1.26440000  | -7.96160000 | -1.33710000 |
| Si | 2.53760000  | -5.96470000 | -1.31290000 |
| Si | 4.91420000  | -6.23550000 | -1.20480000 |
| Si | 6.12440000  | -4.18540000 | -1.12580000 |
| Si | 8.48850000  | -4.15250000 | -0.93270000 |
| Si | 9.66000000  | -2.04540000 | -0.88420000 |
| Si | -2.38820000 | -5.84690000 | -1.24950000 |
| Si | 1.24260000  | -3.95760000 | -1.41400000 |
| Si | 5.02870000  | -2.11050000 | -1.24890000 |
| Si | 8.46790000  | 0.00980000  | -0.98190000 |
| Si | -4.77600000 | -6.10970000 | -1.18310000 |
| Si | -1.15870000 | -3.79950000 | -1.28900000 |
| Si | 2.69180000  | -2.07280000 | -1.38780000 |
| Si | 6.11840000  | -0.00980000 | -1.16840000 |
| Si | 9.63320000  | 2.08020000  | -0.89450000 |
| Si | 8.44190000  | 4.17700000  | -0.94610000 |
| Si | 5.02500000  | 2.08660000  | -1.25980000 |
| Si | 1.67910000  | -0.00410000 | -1.66890000 |
| Si | -2.78800000 | -2.10670000 | -1.61840000 |
| Si | -6.10900000 | -4.13230000 | -1.09640000 |
| Si | -5.06570000 | -2.02900000 | -1.13560000 |
| Si | -1.64040000 | -0.10000000 | -1.50870000 |
| Si | 2.68740000  | 2.05910000  | -1.42020000 |
| Si | 6.07770000  | 4.18230000  | -1.14210000 |
| Si | -8.47100000 | -4.11490000 | -0.90310000 |
| Si | -9.70610000 | -2.03850000 | -0.86220000 |



|    |             |             |             |
|----|-------------|-------------|-------------|
| Si | -6.21730000 | 0.02820000  | -1.16690000 |
| Si | -2.62610000 | 2.00900000  | -1.41870000 |
| Si | 1.22840000  | 3.92490000  | -1.40920000 |
| Si | 4.84540000  | 6.22200000  | -1.22630000 |
| Si | -8.56270000 | 0.04190000  | -0.96940000 |
| Si | -4.97570000 | 2.03410000  | -1.26990000 |
| Si | -1.17320000 | 3.88430000  | -1.40870000 |
| Si | 2.46880000  | 5.95660000  | -1.32340000 |
| Si | -9.68330000 | 2.13390000  | -0.89900000 |
| Si | -6.04060000 | 4.12970000  | -1.16660000 |
| Si | -2.41920000 | 5.91430000  | -1.33520000 |
| Si | 1.21900000  | 7.97220000  | -1.32530000 |
| Si | -8.40950000 | 4.18100000  | -0.98580000 |
| Si | -4.79920000 | 6.16420000  | -1.25890000 |
| Si | -1.19550000 | 7.94740000  | -1.33240000 |
| H  | 1.73300000  | -9.10070000 | -2.19360000 |
| H  | 1.83580000  | -9.12240000 | 1.88870000  |
| H  | -5.20090000 | -7.24670000 | 2.08830000  |
| H  | -8.90790000 | -5.08920000 | 2.38860000  |
| H  | -8.81470000 | 5.23630000  | 2.29150000  |
| H  | -5.20080000 | 7.27840000  | 2.03780000  |
| H  | -1.78970000 | 9.04960000  | 1.91290000  |
| H  | 1.77980000  | 9.08060000  | 1.92320000  |
| H  | 5.23380000  | 7.31310000  | 2.07290000  |
| H  | 8.86210000  | 5.17040000  | 2.34990000  |
| H  | 8.92830000  | -5.13250000 | 2.36640000  |
| H  | 5.30070000  | -7.32260000 | 2.08900000  |
| H  | 5.50450000  | -7.34340000 | -2.02250000 |
| H  | 9.26810000  | -5.18320000 | -1.69180000 |
| H  | 9.21230000  | 5.21660000  | -1.70240000 |
| H  | 5.42680000  | 7.33260000  | -2.04710000 |
| H  | 1.72220000  | 9.10610000  | -2.16780000 |
| H  | -1.71240000 | 9.07160000  | -2.17970000 |
| H  | -5.37240000 | 7.26460000  | -2.09950000 |
| H  | -9.14520000 | 5.23750000  | -1.75400000 |
| H  | -9.24170000 | -5.16970000 | -1.63850000 |
| H  | -5.32130000 | -7.23860000 | -2.00560000 |
| H  | -1.73920000 | -9.09800000 | 1.86010000  |
| H  | -1.69310000 | -8.96570000 | -2.20580000 |
| C  | -0.57560000 | -0.36100000 | -3.09540000 |
| O  | -1.13190000 | -0.81650000 | -4.14240000 |
| O  | 0.70560000  | -0.09310000 | -3.15730000 |
| H  | -2.14790000 | -1.47920000 | -3.76080000 |
| H  | -2.84720000 | -2.07510000 | -3.34400000 |

|   |              |             |             |
|---|--------------|-------------|-------------|
| H | -11.01010000 | -2.15840000 | -1.59260000 |
| H | -10.72620000 | -2.08690000 | 2.44630000  |
| H | -10.97470000 | 2.26660000  | -1.64810000 |
| H | -10.70530000 | 2.25770000  | 2.41180000  |
| H | 10.95540000  | -2.13100000 | -1.63410000 |
| H | 10.68620000  | -2.08320000 | 2.42930000  |
| H | 10.66660000  | 2.14320000  | 2.41680000  |
| H | 10.92600000  | 2.17990000  | -1.64710000 |

• **TS 2Si-CO<sub>2</sub> + H<sub>2</sub>\* → 2Si-CO-OH**

|    |                   |                   |                   |
|----|-------------------|-------------------|-------------------|
| Si | 1.15531134480354  | 8.07522164415367  | -1.32843049443186 |
| Si | -1.23701516890163 | 8.04614931426062  | -1.34183736624089 |
| Si | -2.36919479165206 | 5.96531953495523  | -1.32715398383789 |
| Si | -4.72852436976701 | 6.15879289187151  | -1.36850308269545 |
| Si | -5.71681106457410 | 4.00907872448626  | -1.35028104595511 |
| Si | -8.08558239953691 | 4.02278557970585  | -1.40217683050504 |
| Si | -9.24489088298084 | 1.93047240961538  | -1.41787080007004 |
| Si | 2.35715033325279  | 6.03440146953308  | -1.29010383977373 |
| Si | -1.13984481792827 | 3.94409130605846  | -1.27420660533318 |
| Si | -4.50773079993111 | 1.97478035559238  | -1.29288845440148 |
| Si | -7.99096695122425 | -0.07658559736735 | -1.36456863174593 |
| Si | 4.71336576947205  | 6.27433661229443  | -1.31516386762551 |
| Si | 1.20506813874534  | 3.96983503456013  | -1.24145803221694 |
| Si | -2.15057057181485 | 1.80606951631008  | -1.31116623187729 |
| Si | -5.63626512369761 | -0.08020648057479 | -1.28000037870374 |
| Si | -9.26641526194762 | -2.06149178088160 | -1.40765852774584 |
| Si | -7.94582454017884 | -4.05048252447221 | -1.39090380251516 |
| Si | -4.20906036140738 | -1.96019601534095 | -1.26303583250958 |
| Si | -1.01813357484642 | -0.18096247138909 | -1.77104414433584 |
| Si | 2.11912099389424  | 1.79468529332467  | -1.22718855185379 |
| Si | 5.66836316682433  | 4.10596592448990  | -1.32102852516331 |
| Si | 4.47524935647981  | 2.05589322602570  | -1.26622841939548 |
| Si | 1.15718809587073  | 0.02895136125109  | -2.42441686531623 |
| Si | -2.24813821167033 | -1.98686709229291 | -2.53638100984261 |
| Si | -5.57938067988148 | -3.90016584827158 | -1.28351964568409 |
| Si | 8.04036806436807  | 4.08632120962202  | -1.37611741103987 |
| Si | 9.23017549360196  | 2.00628707992582  | -1.39586851771363 |
| Si | 5.62940933289393  | 0.01218359871529  | -1.34671835231267 |
| Si | 2.14203488504694  | -1.77237603363848 | -1.28812156355243 |
| Si | -1.24599674436170 | -3.69973207467834 | -1.28752718087765 |
| Si | -4.60483667372778 | -6.05494866185171 | -1.32658992519191 |
| Si | 7.98189808797464  | -0.00071686838525 | -1.37803794986933 |
| Si | 4.49315040471096  | -2.04227145576438 | -1.30552792213883 |

|    |                   |                   |                   |
|----|-------------------|-------------------|-------------------|
| Si | 1.10684169727384  | -3.88731050649388 | -1.24150326953109 |
| Si | -2.24948374884864 | -5.85143005874793 | -1.29476639838639 |
| Si | 9.23689702275442  | -2.00453951151199 | -1.41205063080719 |
| Si | 5.68504001698635  | -4.08417031555730 | -1.36657746940849 |
| Si | 2.28468474433490  | -5.94444416408790 | -1.33782517072633 |
| Si | -1.20090058972995 | -7.97219212122759 | -1.36058218042246 |
| Si | 8.05610078625161  | -4.08982141639563 | -1.40622427940094 |
| Si | 4.64097262147549  | -6.20629207100472 | -1.38409765856408 |
| Si | 1.18169289448707  | -8.03604947410567 | -1.36702151321587 |
| Si | 1.14973798509499  | 8.10972649925585  | 1.07625768857269  |
| Si | -1.24893774700917 | 8.06989498307063  | 1.06532180175896  |
| Si | -2.40432856765780 | 6.00291736776592  | 1.07752774254737  |
| Si | -4.76812801817978 | 6.19483408727077  | 1.05891812284717  |
| Si | -5.77053440144779 | 4.04922399072655  | 1.05235031840708  |
| Si | -8.13910070522928 | 4.03685302337649  | 1.00186542421394  |
| Si | -9.31464244929806 | 1.94651348348292  | 0.98662088437786  |
| Si | 2.37152174548684  | 6.07941853337624  | 1.11500218246943  |
| Si | -1.15848715548796 | 3.99348385790365  | 1.12002880532562  |
| Si | -4.57567878536197 | 2.00924568986351  | 1.09816166244991  |
| Si | -8.07852371537891 | -0.07131315909827 | 1.04073670075520  |
| Si | 4.73499117941624  | 6.29213899066712  | 1.10396555773054  |
| Si | 1.19292054321214  | 4.02649249861314  | 1.15624828873931  |
| Si | -2.22859441038958 | 1.89696569357586  | 1.11134650954678  |
| Si | -5.72457275587233 | -0.03815603115025 | 1.11533917726412  |
| Si | -9.32880916052834 | -2.07574421278403 | 0.99770819141420  |
| Si | -8.04158336505861 | -4.09264873768964 | 1.00986351260900  |
| Si | -4.43898131926495 | -1.99774805907453 | 1.20461092062280  |
| Si | -1.09329367388229 | 0.02341333148421  | 1.86492988739791  |
| Si | 2.23437789247777  | 1.92057882648627  | 1.19604822083392  |
| Si | 5.72492858409647  | 4.13636372425289  | 1.07948403989972  |
| Si | 4.57421533610212  | 2.07151488692773  | 1.13689086154550  |
| Si | 1.23801585177178  | 0.00669726811097  | 2.04810517060232  |
| Si | -2.28510536701874 | -2.02259915464875 | 2.02208444326897  |
| Si | -5.67933586250602 | -3.98701913180377 | 1.10721945109419  |
| Si | 8.09536930246438  | 4.10168145254661  | 1.02409630106147  |
| Si | 9.26843860254713  | 2.00716498909270  | 1.01051971532330  |
| Si | 5.67895210677024  | -0.00024933556166 | 1.06785126775114  |
| Si | 2.23860396783735  | -1.87327181830905 | 1.13432157462100  |
| Si | -1.17986692806334 | -3.86836085807592 | 1.18625298379222  |
| Si | -4.64296901475649 | -6.10966435586319 | 1.08901337845114  |
| Si | 8.03154345682130  | -0.00876995188179 | 1.02803231919903  |
| Si | 4.57497596746808  | -2.07290128868151 | 1.09865703301617  |
| Si | 1.15983584335121  | -3.95071662302434 | 1.16057594065407  |
| Si | -2.28341099983149 | -5.94037444597621 | 1.09914150969236  |

|    |                    |                   |                   |
|----|--------------------|-------------------|-------------------|
| Si | 9.27731282709976   | -2.01935088747094 | 0.99371846877800  |
| Si | 5.73277724221603   | -4.12963066647685 | 1.03554130467804  |
| Si | 2.32778078686422   | -6.00733086345935 | 1.05941138641293  |
| Si | -1.19630412041398  | -8.03798423890743 | 1.04461971485095  |
| Si | 8.10278111817908   | -4.11218286244581 | 0.99465648824441  |
| Si | 4.68672085322975   | -6.25415628629606 | 1.03506753521284  |
| Si | 1.19195760575999   | -8.08097210980752 | 1.03804943474592  |
| H  | -1.82651911311713  | 9.17569071081212  | 1.89615134508037  |
| H  | -1.82030962292940  | 9.12886830130507  | -2.19832290159744 |
| H  | 5.30932224859273   | 7.32652917685090  | -2.19947461551735 |
| H  | 8.69621478394040   | 5.12102421735196  | -2.23960196977149 |
| H  | 8.71594531428440   | -5.12001159762486 | -2.27171456642877 |
| H  | 5.19171569131537   | -7.27084235945696 | -2.28308563188738 |
| H  | 1.76404492958762   | -9.10685457522791 | -2.23831067740787 |
| H  | -1.84133446043356  | -9.00546340446483 | -2.23648889873976 |
| H  | -5.21029188006212  | -7.07673999908122 | -2.24095014979186 |
| H  | -8.49403740310649  | -5.13137742916569 | -2.27231850433998 |
| H  | -8.74653488268942  | 5.05269167386889  | -2.26704273811365 |
| H  | -5.32909807201009  | 7.19773177837058  | -2.26569392992477 |
| H  | -5.38647479925104  | 7.25470108280412  | 1.91916692746534  |
| H  | -8.84696861384377  | 5.06828363074389  | 1.82724197453723  |
| H  | -8.68503019825312  | -5.17862730192992 | 1.81837971415292  |
| H  | -5.23733276509455  | -7.15736485872308 | 1.98205566584765  |
| H  | -1.80287753809692  | -9.12700007146084 | 1.87694688394556  |
| H  | 1.75942437029000   | -9.18636676732761 | 1.87603213213753  |
| H  | 5.27289014885024   | -7.33664545429993 | 1.88949500666825  |
| H  | 8.80729297294105   | -5.14731610793299 | 1.81829234283406  |
| H  | 8.81196248884526   | 5.13008385686309  | 1.84606050235006  |
| H  | 5.35414537331694   | 7.34248456327506  | 1.97485346228355  |
| H  | 1.71985077865081   | 9.16969847881846  | -2.18224858957056 |
| H  | 1.67461938980100   | 9.24407457048450  | 1.90360407673848  |
| C  | 0.59997394253546   | -0.11541593559193 | 3.89889412302224  |
| O  | 1.04706922538449   | -0.29590815266636 | 4.99043189112491  |
| O  | -0.85324118057420  | -0.02114235919384 | 3.70958164173064  |
| H  | -10.46742007872786 | -2.12574515313647 | -2.30083908028278 |
| H  | -10.56769798929178 | -2.16177779915936 | 1.83637595121103  |
| H  | -10.57099836905092 | 2.00727441305853  | 1.80164798400898  |
| H  | -10.45656542787846 | 1.94682173792770  | -2.29946097563238 |
| H  | 10.52158025334115  | -2.07585495619144 | 1.82770121228258  |
| H  | 10.51200726999161  | 2.05844758561267  | 1.84601760633657  |
| H  | 10.45588593028972  | -2.03996308380089 | -2.28354129585665 |
| H  | 10.44941012159825  | 2.05553872702970  | -2.26646329099469 |
| H  | -2.17674087565383  | -1.88636132127374 | 3.79465221244391  |
| H  | -1.61266816201611  | -1.10231345954088 | 3.95278559981117  |

• TS 2Si-CO-OH → 2Si-CO-H<sub>2</sub>O

|    |                   |                   |                   |
|----|-------------------|-------------------|-------------------|
| Si | 1.18518362367747  | 8.07797845318921  | -1.31203162171124 |
| Si | -1.20887800211675 | 8.08425137052934  | -1.32217694037444 |
| Si | -2.35474240925322 | 6.01172258726100  | -1.29096781494911 |
| Si | -4.71738023734314 | 6.16718646197786  | -1.31483758199087 |
| Si | -5.66722987866168 | 3.99944617890615  | -1.27575260960441 |
| Si | -8.03809862337094 | 4.02019688884006  | -1.29180923800648 |
| Si | -9.21129859371595 | 1.93676553051487  | -1.28384417920595 |
| Si | 2.36694516070437  | 6.02409752765629  | -1.26582155021625 |
| Si | -1.14191205184326 | 3.97591003804919  | -1.25287839245062 |
| Si | -4.46870884030552 | 1.95902579942314  | -1.22974128573629 |
| Si | -7.96496187023917 | -0.07225306423963 | -1.25892080951944 |
| Si | 4.72473308485708  | 6.24819655726790  | -1.27479748751852 |
| Si | 1.20589671565188  | 3.96009510855739  | -1.23799134784154 |
| Si | -2.10626869446038 | 1.81679137593690  | -1.29006413641942 |
| Si | -5.61311063817487 | -0.08517001164365 | -1.21305629183129 |
| Si | -9.25948881871483 | -2.04437911111824 | -1.28790220857923 |
| Si | -7.96639989581490 | -4.05133466831051 | -1.29877843094310 |
| Si | -4.23173003480821 | -1.99015553827536 | -1.22616357612222 |
| Si | -0.96668197633968 | -0.18127110658356 | -1.68387409545728 |
| Si | 2.08626801736912  | 1.76612164940497  | -1.27640503607543 |
| Si | 5.66095147292107  | 4.07307284698548  | -1.25746087207355 |
| Si | 4.44170616858684  | 2.03867120526154  | -1.21751470397247 |
| Si | 1.17062325389448  | 0.02337751692250  | -2.56184884470568 |
| Si | -2.22245818517095 | -1.95401352014985 | -2.39400749540534 |
| Si | -5.59733305498684 | -3.92299117865754 | -1.25775731719468 |
| Si | 8.03263208270779  | 4.05223533560742  | -1.28047098277155 |
| Si | 9.21825283649900  | 1.97064783233858  | -1.28424833772118 |
| Si | 5.60050359936628  | -0.00567135395303 | -1.28192560794922 |
| Si | 2.10484962316039  | -1.75499696066169 | -1.32923924441661 |
| Si | -1.24981392281905 | -3.75611800101921 | -1.28072339894285 |
| Si | -4.63220860404219 | -6.08029788421023 | -1.29951628482638 |
| Si | 7.95528427748466  | -0.02550401092832 | -1.28043489205997 |
| Si | 4.45383283653372  | -2.05439300667837 | -1.25349506748158 |
| Si | 1.10039405143062  | -3.89206503600834 | -1.24609241140615 |
| Si | -2.27356755515401 | -5.89298634096216 | -1.29035153618682 |
| Si | 9.21235897399765  | -2.02703021317019 | -1.29586066643380 |
| Si | 5.65479876568408  | -4.09139651269714 | -1.28857177635923 |
| Si | 2.26655417426589  | -5.95714395859706 | -1.29369836063162 |
| Si | -1.21881585448160 | -8.00771347770899 | -1.34292954519866 |
| Si | 8.02453611719324  | -4.10714471569431 | -1.29894695824234 |
| Si | 4.62205007310487  | -6.21760465784176 | -1.31573289617182 |
| Si | 1.16540566060663  | -8.05140751256159 | -1.34093355629655 |

|    |                   |                   |                   |
|----|-------------------|-------------------|-------------------|
| Si | 1.17988624534249  | 8.12699181329450  | 1.09246361730836  |
| Si | -1.21663353697008 | 8.12876429323955  | 1.08231105729218  |
| Si | -2.37454649046741 | 6.06510370005378  | 1.11391410377026  |
| Si | -4.73746555833058 | 6.21049833645701  | 1.11204952446101  |
| Si | -5.69061010156894 | 4.04186309598066  | 1.12958866486161  |
| Si | -8.05810246118808 | 4.03627582703878  | 1.11282478369666  |
| Si | -9.23220793306628 | 1.94682227744156  | 1.12119713701241  |
| Si | 2.37385945485210  | 6.08024269823321  | 1.13823419653921  |
| Si | -1.16192898919373 | 4.03580065551704  | 1.14436819169147  |
| Si | -4.51616772234042 | 1.99072206188020  | 1.15992795952918  |
| Si | -7.99857076848501 | -0.07430559614275 | 1.14763632800455  |
| Si | 4.73393600994825  | 6.28039942851201  | 1.14186400178378  |
| Si | 1.18270147389705  | 4.03749163274076  | 1.16409437009156  |
| Si | -2.15769652773115 | 1.90465120688236  | 1.10403097562437  |
| Si | -5.63849040210213 | -0.07839387678666 | 1.18362616603892  |
| Si | -9.27964541680615 | -2.06144022870191 | 1.11787746073449  |
| Si | -8.00414724243768 | -4.08508385499053 | 1.10210711267292  |
| Si | -4.30532845701861 | -2.02640551716127 | 1.21742624372799  |
| Si | -1.27173279555352 | -0.04176762782577 | 2.02238645746565  |
| Si | 2.17909667713917  | 1.91693860746398  | 1.15233959781796  |
| Si | 5.68833401819924  | 4.11080183898540  | 1.14249318030575  |
| Si | 4.51734060549159  | 2.05199481236448  | 1.19211309688484  |
| Si | 1.09541099762827  | -0.00758274501995 | 1.97120613294415  |
| Si | -2.28568401452580 | -2.14224093958309 | 2.37790272312300  |
| Si | -5.63984438715382 | -3.97105396356857 | 1.14079233120492  |
| Si | 8.05772291759112  | 4.06843585288495  | 1.12040587723208  |
| Si | 9.22646338321293  | 1.97371794602523  | 1.12255217187579  |
| Si | 5.62262945527697  | -0.01597279621211 | 1.13055076120387  |
| Si | 2.16821640473646  | -1.91197754603619 | 1.10128317422359  |
| Si | -1.24423248390248 | -3.83826377185249 | 1.17385628077482  |
| Si | -4.64436738610383 | -6.11698952239518 | 1.11501520710978  |
| Si | 7.97657889431268  | -0.03214629514875 | 1.12594089009866  |
| Si | 4.50505957663793  | -2.07680883072781 | 1.15575758072977  |
| Si | 1.09351100794774  | -3.98182898552069 | 1.16606408008247  |
| Si | -2.28312333425406 | -5.95240184915932 | 1.10709898399978  |
| Si | 9.22473619601575  | -2.03899791129040 | 1.11041949514539  |
| Si | 5.67017280580845  | -4.13317168691167 | 1.11312074854371  |
| Si | 2.28512463940384  | -6.02421404468506 | 1.10270251652536  |
| Si | -1.22016072953702 | -8.06243024102121 | 1.06307513910332  |
| Si | 8.03973403785474  | -4.12375501142359 | 1.10229771166312  |
| Si | 4.64142924838556  | -6.26384134990793 | 1.10136397493388  |
| Si | 1.16615348155220  | -8.10720496158522 | 1.06311960479405  |
| H  | -1.78388103208361 | 9.24307152449629  | 1.90865273679866  |
| H  | -1.77499816134956 | 9.16837381997828  | -2.18814411628192 |

|   |                    |                   |                   |
|---|--------------------|-------------------|-------------------|
| H | 5.33959053930607   | 7.28345471417196  | -2.16586944117994 |
| H | 8.69925018704266   | 5.08754945705657  | -2.13475156076943 |
| H | 8.68987691415352   | -5.14239209885786 | -2.15399262662464 |
| H | 5.18999618820339   | -7.27426347197380 | -2.21320762998342 |
| H | 1.76256711501160   | -9.11240317881786 | -2.21495015993052 |
| H | -1.83576882185243  | -9.05404505652271 | -2.22069537447528 |
| H | -5.24609426418858  | -7.10121170166898 | -2.21031900621535 |
| H | -8.55333271993784  | -5.12318156473199 | -2.16690875201670 |
| H | -8.70243788759497  | 5.05575361421676  | -2.14776900170926 |
| H | -5.34442412178797  | 7.19361185973187  | -2.20879159418133 |
| H | -5.36848322041809  | 7.26396132492778  | 1.97152814643274  |
| H | -8.74916699428805  | 5.07425016992089  | 1.94488651651074  |
| H | -8.63474652563733  | -5.16768130307188 | 1.92566427165643  |
| H | -5.24363242438306  | -7.16852617544817 | 2.00092974642225  |
| H | -1.83147008364175  | -9.14706375763499 | 1.89772726358317  |
| H | 1.75009322296909   | -9.20951506584316 | 1.89405315206328  |
| H | 5.22585996835788   | -7.33618183627453 | 1.96955785429443  |
| H | 8.72544619693786   | -5.16007391438368 | 1.94018808641956  |
| H | 8.76169025766089   | 5.09688439116092  | 1.95318631449110  |
| H | 5.35490550878158   | 7.32533264415521  | 2.01786899961907  |
| H | 1.76405871096556   | 9.16318508817305  | -2.16844609352068 |
| H | 1.73743066147495   | 9.25164646122052  | 1.91169585613393  |
| C | 1.52900104981311   | -0.03253881874555 | 3.76296560750879  |
| O | 1.88767250011535   | -0.05114816111022 | 4.86279373051821  |
| O | -1.52615814790361  | 0.17353820330008  | 3.88722983841322  |
| H | -10.47497816699848 | -2.08551776634005 | -2.16337610373724 |
| H | -10.50737677544752 | -2.13391807466058 | 1.97483796937349  |
| H | -10.47218789358561 | 2.01225130968205  | 1.96126725214089  |
| H | -10.43959050958937 | 1.96397494840066  | -2.14209002034499 |
| H | 10.45718997376925  | -2.09184089908072 | 1.96199095993521  |
| H | 10.45743549478508  | 2.01765834664172  | 1.97690814669656  |
| H | 10.44001754546541  | -2.06325813550754 | -2.15485749763555 |
| H | 10.44656503079938  | 2.01236749442493  | -2.14215334833983 |
| H | -1.99703815003471  | -1.00354314551545 | 3.86935683096219  |
| H | -2.22445978526769  | 0.82940640023369  | 4.10923182534670  |

• **TS 2Si-COOH → 2Si-HCOOH**

|    |                   |                  |                   |
|----|-------------------|------------------|-------------------|
| Si | 1.23043678522948  | 7.97903296000883 | -1.14547680528940 |
| Si | -1.16356521198183 | 8.05343399591186 | -1.14640343900286 |
| Si | -2.41413697351529 | 6.04028998938742 | -1.16967093902108 |
| Si | -4.77245273319557 | 6.27220603627383 | -1.26384452668348 |
| Si | -5.85720368514846 | 4.15450502827127 | -1.31395823900415 |
| Si | -8.22989078828295 | 4.14338420450855 | -1.49649888995961 |

|    |                   |                   |                   |
|----|-------------------|-------------------|-------------------|
| Si | -9.44224772316130 | 2.07237106169331  | -1.54529904284471 |
| Si | 2.36989920744205  | 5.90217349954669  | -1.17448608109056 |
| Si | -1.22437809626777 | 4.00522838864665  | -1.12447981224110 |
| Si | -4.73214889987650 | 2.06973305351605  | -1.19616625175062 |
| Si | -8.24593017581201 | 0.03156409176190  | -1.44956243633245 |
| Si | 4.73633162636287  | 6.05532585139801  | -1.25776522631843 |
| Si | 1.12056124570087  | 3.90412304018438  | -1.17972951628267 |
| Si | -2.37017348831571 | 1.96767890186611  | -1.04340035041579 |
| Si | -5.90910684007735 | 0.04279967363494  | -1.27951078271274 |
| Si | -9.41569226752778 | -2.02469321221018 | -1.53808717253306 |
| Si | -8.15609788793273 | -4.06618188884952 | -1.48596332763414 |
| Si | -4.67034521694108 | -1.94419587125217 | -1.17026095696938 |
| Si | -0.96453293429225 | 0.07441469960091  | -0.77506240657006 |
| Si | 2.37697915277144  | 1.93460316629240  | -1.32088544180047 |
| Si | 5.84653974286326  | 3.95605433606737  | -1.29638886320805 |
| Si | 4.71803882641533  | 1.87962919183716  | -1.24381252752614 |
| Si | 1.32337594296272  | -0.18141883568627 | -1.17295369765378 |
| Si | -2.31200209976322 | -1.86563731244335 | -0.98960498271679 |
| Si | -5.78799080474934 | -4.02368408416959 | -1.29200258304726 |
| Si | 8.20522384169058  | 3.93378953997368  | -1.49675328255458 |
| Si | 9.31985806306401  | 1.81435203139459  | -1.57512299560987 |
| Si | 5.75879972774718  | -0.22330484593077 | -1.20899989607843 |
| Si | 2.28576459472162  | -1.94244687092972 | -2.45607892971690 |
| Si | -1.05029874064196 | -3.84119004839004 | -1.08653175389732 |
| Si | -4.64189324093331 | -6.10125557986838 | -1.25264217431977 |
| Si | 8.10563610025589  | -0.21932995186312 | -1.45169435600722 |
| Si | 4.23440916582069  | -2.03111372518040 | -1.14659485508027 |
| Si | 1.29894975662127  | -3.65092979827832 | -1.18737845739042 |
| Si | -2.28598560597136 | -5.85540348252940 | -1.16455040216516 |
| Si | 9.36331748993139  | -2.21141207348446 | -1.55865361490462 |
| Si | 5.63005570505629  | -3.94322546917128 | -1.14977772216891 |
| Si | 2.25917390340056  | -5.81633966277324 | -1.19055792615493 |
| Si | -1.21144781681505 | -7.96145524315635 | -1.18981128846503 |
| Si | 7.97699982399422  | -4.15085347374121 | -1.48305736474367 |
| Si | 4.60299859634666  | -6.07881161797485 | -1.22026412487585 |
| Si | 1.17088061151918  | -7.91798228621071 | -1.19104551024796 |
| Si | 1.23922663019704  | 7.92267466856981  | 1.25809208534050  |
| Si | -1.17650781004757 | 8.01351338683542  | 1.25761654486852  |
| Si | -2.48397559003120 | 6.03394402235018  | 1.23102916471949  |
| Si | -4.86167717274613 | 6.27979697384656  | 1.15364687687818  |
| Si | -6.03331921191466 | 4.20669776595467  | 1.08133282930121  |
| Si | -8.39904301524111 | 4.18373881717695  | 0.89872852456815  |
| Si | -9.59343166443821 | 2.08946519291788  | 0.85440502393511  |
| Si | 2.43044503641413  | 5.86757258903103  | 1.21914317685467  |



|    |                   |                   |                   |
|----|-------------------|-------------------|-------------------|
| Si | -1.25148410728827 | 3.99808948092078  | 1.29337944273655  |
| Si | -4.94273336432833 | 2.12779411923835  | 1.19668896355747  |
| Si | -8.40544352113846 | 0.03380009053111  | 0.95125892549706  |
| Si | 4.82184177181948  | 6.05061469651470  | 1.16747045412338  |
| Si | 1.12813485509403  | 3.87788067904612  | 1.25401255598363  |
| Si | -2.60717781457239 | 2.06340573406340  | 1.33724366610427  |
| Si | -6.05522819732205 | 0.04551308266904  | 1.12856201337697  |
| Si | -9.56113433784244 | -2.04061915090341 | 0.86154379730893  |
| Si | -8.33314995339081 | -4.11614108714290 | 0.90950148374599  |
| Si | -4.88577383712451 | -2.00988002559648 | 1.22797418575406  |
| Si | -1.50105628152879 | 0.04196099032021  | 1.61508686151875  |
| Si | 2.60935872980994  | 2.06575930448814  | 1.05887051713006  |
| Si | 6.03975605784525  | 4.00105071289475  | 1.09693678977060  |
| Si | 4.92508408542229  | 1.93821731160470  | 1.16076512375609  |
| Si | 1.78361612735581  | -0.11969895441838 | 1.17379359600853  |
| Si | -2.54330635437219 | -2.00735892108173 | 1.38384614479303  |
| Si | -5.97038394766037 | -4.08717470305787 | 1.10256052772543  |
| Si | 8.40121102408829  | 3.95263091197929  | 0.89888859257208  |
| Si | 9.53302848754005  | 1.82730576303675  | 0.82020323710917  |
| Si | 5.98002972966191  | -0.17699313819715 | 1.18763216273211  |
| Si | 2.56566921713444  | -2.03503085934397 | 2.22498659333263  |
| Si | -1.09596870786345 | -3.87219326659810 | 1.31033237003154  |
| Si | -4.72868865247085 | -6.11770339375029 | 1.17027771695824  |
| Si | 8.32388292268273  | -0.21252542464230 | 0.94113071463765  |
| Si | 4.72744336677622  | -2.15875077929288 | 1.42957796497955  |
| Si | 1.27872552516043  | -3.73487036698627 | 1.27936285996203  |
| Si | -2.34693828045736 | -5.89730610600398 | 1.23440095535782  |
| Si | 9.54063733379797  | -2.24505533230530 | 0.83636761008790  |
| Si | 5.92848013309791  | -4.14183838315957 | 1.23920895231438  |
| Si | 2.32814767130391  | -5.84897763850958 | 1.20676169854143  |
| Si | -1.22386288438916 | -7.97830527278147 | 1.21547770641549  |
| Si | 8.26304653465351  | -4.27633886168489 | 0.89514887671892  |
| Si | 4.68937120489201  | -6.16208612639447 | 1.18159597763332  |
| Si | 1.17674898130250  | -7.91922142970026 | 1.21334361231462  |
| H  | -1.64685359437224 | 9.15368433447174  | 2.11100001930343  |
| H  | -1.70872799669172 | 9.18121233406348  | -1.96951253648723 |
| H  | 5.30386549983685  | 7.13504379058973  | -2.12821884708760 |
| H  | 8.83599174360835  | 4.94244961140029  | -2.40792499714776 |
| H  | 8.37457278476134  | -5.24044373785586 | -2.43171100370923 |
| H  | 5.21877581441536  | -7.07135886797069 | -2.15900545181840 |
| H  | 1.80043552554171  | -8.98080666754926 | -2.03948957620622 |
| H  | -1.81701765781054 | -9.02181778263509 | -2.05827146385430 |
| H  | -5.16520169757668 | -7.19544594072665 | -2.13256651949738 |
| H  | -8.73942347293631 | -5.11004087947725 | -2.38958630439093 |

|   |                    |                   |                   |
|---|--------------------|-------------------|-------------------|
| H | -8.84574232874328  | 5.17302764597714  | -2.39493361480298 |
| H | -5.31417855270108  | 7.35940346578965  | -2.14037842492103 |
| H | -5.45577897737247  | 7.37764823735703  | 1.98248934224267  |
| H | -9.16641595593775  | 5.22325334139274  | 1.65841564464948  |
| H | -9.08934120129503  | -5.16555211912522 | 1.66690808486844  |
| H | -5.30289104449024  | -7.22556411929140 | 2.00084439559745  |
| H | -1.75301007215056  | -9.09485066894677 | 2.06483118739944  |
| H | 1.75928223115974   | -9.01046141940533 | 2.06084929452951  |
| H | 5.20055280796460   | -7.28264729829654 | 2.03610431340153  |
| H | 8.99235702816425   | -5.38127957493882 | 1.59753057957417  |
| H | 9.19259935452379   | 4.96588498904003  | 1.66904799548065  |
| H | 5.40398825608335   | 7.15005269100694  | 2.00408309667494  |
| H | 1.83745172393373   | 9.07817881149362  | -1.96413702676045 |
| H | 1.78922835469413   | 9.02609310365663  | 2.11202715369792  |
| C | 0.82870132492376   | 0.06852117465404  | 2.92602144905085  |
| O | 1.41563813893446   | 0.88058691632663  | 3.85180951738110  |
| O | -0.48709034828590  | 0.11036086882912  | 3.05657853085086  |
| H | 2.38412086637356   | 0.86701404729478  | 3.69468141421084  |
| H | 1.37215459004059   | -1.27558156925364 | 3.37803689688092  |
| H | 10.48930394143662  | 1.82506616400301  | -2.51281005593393 |
| H | 10.84379506503086  | 1.89249347205987  | 1.54543365702496  |
| H | 10.82170315768783  | -2.34165713932476 | 1.60778370447276  |
| H | 10.51452354409480  | -2.30402268500340 | -2.51210198391656 |
| H | -10.84633241940306 | -2.15573367856720 | 1.62450078132279  |
| H | -10.88418325333503 | 2.18933324453495  | 1.61022349768800  |
| H | -10.63134511507638 | 2.13250866939343  | -2.45546819843112 |
| H | -10.60102046362769 | -2.10854524508824 | -2.45118247540344 |

• **TS 2Si-HCOOH → 2Si...HCOOH**

|    |                   |                   |                   |
|----|-------------------|-------------------|-------------------|
| Si | -1.03287312382818 | -7.96709703218677 | -1.19865698988844 |
| Si | 1.36726537556958  | -8.03528993423733 | -1.21683850511615 |
| Si | 2.60323865887910  | -6.01619336132483 | -1.32185007936511 |
| Si | 4.96879160591636  | -6.24195076537179 | -1.32973069296743 |
| Si | 6.01071378179957  | -4.11579309955886 | -1.33840323548480 |
| Si | 8.38915206662242  | -4.06889490877265 | -1.33345945552079 |
| Si | 9.48285197859787  | -1.94324629882639 | -1.34459792523905 |
| Si | -2.21129275821881 | -5.90769120610908 | -1.23092576627967 |
| Si | 1.34030950568178  | -4.01917085400577 | -1.41290150363900 |
| Si | 4.77749914950552  | -2.09724180878389 | -1.26063915270787 |
| Si | 8.15950578142447  | 0.02276628857186  | -1.31094093456883 |
| Si | -4.58588458997333 | -6.07756155484022 | -1.21961547832902 |
| Si | -1.01499768222802 | -3.87250867516021 | -1.30411030994106 |
| Si | 2.43881780423983  | -1.96903500859723 | -1.58070245177056 |

|    |                   |                   |                   |
|----|-------------------|-------------------|-------------------|
| Si | 5.80635256926495  | 0.01524210031621  | -1.26784914964265 |
| Si | 9.34582290992031  | 2.07102040826604  | -1.32412170857188 |
| Si | 8.09736164032480  | 4.11333944258303  | -1.30858677487178 |
| Si | 4.58070888907886  | 2.02094028744342  | -1.19378406549888 |
| Si | 1.15747467194886  | -0.07812630846374 | -1.75531804121122 |
| Si | -2.31916947118498 | -1.92700548235254 | -1.43292294418634 |
| Si | -5.75425412746127 | -4.00470532595654 | -1.24839302363619 |
| Si | -4.66155008370681 | -1.91027105568630 | -1.32975490970958 |
| Si | -1.13133092064339 | 0.09501115477045  | -1.46267640315314 |
| Si | 2.24488141177948  | 1.87158964580113  | -1.10278122554255 |
| Si | 5.72023912254290  | 4.08789837195663  | -1.24700451002892 |
| Si | -8.12827601011093 | -4.09611950773062 | -1.22858792775717 |
| Si | -9.43856027362051 | -2.07994638029642 | -1.25778976613824 |
| Si | -5.96495865292775 | 0.06552496661787  | -1.34033177300458 |
| Si | -2.46460977733479 | 2.06381930961105  | -1.37905252324818 |
| Si | 1.12375404494290  | 3.94409267611287  | -1.22231948598116 |
| Si | 4.68087212266547  | 6.22002403377460  | -1.26315113921745 |
| Si | -8.32301061473799 | 0.01206493679270  | -1.30158224780931 |
| Si | -4.81956806758553 | 2.12010642649216  | -1.35216549412246 |
| Si | -1.23856300705672 | 4.05139037525427  | -1.29643862736558 |
| Si | 2.32120765481340  | 5.98701421744587  | -1.26315546900057 |
| Si | -9.56881551162584 | 2.03263016346660  | -1.29931977391705 |
| Si | -6.02055530721295 | 4.15578547963125  | -1.34954043597295 |
| Si | -2.51200509430760 | 6.04224156884742  | -1.32494386543502 |
| Si | 1.09631545691815  | 8.02359153055857  | -1.32489986345493 |
| Si | -8.39644023302161 | 4.13102722038346  | -1.32227534643030 |
| Si | -4.88969255542089 | 6.24377368582635  | -1.36079075461707 |
| Si | -1.30460392569690 | 8.07965573436202  | -1.33001470394811 |
| Si | -1.01360372287120 | -7.90853178083718 | 1.20778067496140  |
| Si | 1.38288710825733  | -7.93482575459074 | 1.18720735092459  |
| Si | 2.61721027958974  | -5.91122428984668 | 1.07580423821153  |
| Si | 4.97675592344013  | -6.22115990303130 | 1.09017705523354  |
| Si | 6.02917085425608  | -4.10733185759036 | 1.06334711940141  |
| Si | 8.40636857419032  | -4.06037353452745 | 1.06472333321514  |
| Si | 9.52402028756664  | -1.94665941968787 | 1.06116151871497  |
| Si | -2.18501661326820 | -5.84769763953281 | 1.16556124676004  |
| Si | 1.38462105043750  | -3.88981250991646 | 0.99587978346720  |
| Si | 4.78399564835866  | -2.09653080309467 | 1.14256726605885  |
| Si | 8.19940884556952  | 0.02060149442348  | 1.10380407943145  |
| Si | -4.56220370641029 | -6.01626541422630 | 1.20375361412433  |
| Si | -0.98431346436792 | -3.81854550555078 | 1.11798857163470  |
| Si | 2.47050098194166  | -1.80234334483720 | 0.89052851076497  |
| Si | 5.84458121695861  | -0.00611310549026 | 1.13711660752739  |
| Si | 9.37530026176004  | 2.07721832419158  | 1.08011674619958  |

|    |                   |                   |                   |
|----|-------------------|-------------------|-------------------|
| Si | 8.14956208745216  | 4.13952488441766  | 1.09039137260579  |
| Si | 4.64258588880463  | 2.03446423173530  | 1.20284306955373  |
| Si | 1.18449419152358  | -0.01561539846041 | 1.70779485888498  |
| Si | -2.28712989906204 | -1.88602315320486 | 0.95109677057280  |
| Si | -5.73248606742425 | -3.94960923123655 | 1.15168225943876  |
| Si | -4.62278944843821 | -1.87029658738346 | 1.07895567344381  |
| Si | -1.04129907208069 | 0.12554678355194  | 0.95855680033088  |
| Si | 2.29854963502809  | 1.98548853921944  | 1.31342440637387  |
| Si | 5.77259368892556  | 4.11061694630791  | 1.15614191476291  |
| Si | -8.11025891837336 | -4.05198473185492 | 1.17238156899978  |
| Si | -9.42809678433722 | -2.04552521926793 | 1.14358405266675  |
| Si | -5.94389918152901 | 0.08574262826781  | 1.07550568602689  |
| Si | -2.44802793981906 | 2.04253617337845  | 1.00999464660813  |
| Si | 1.09974038303548  | 4.01017407541298  | 1.18041889373584  |
| Si | 4.68379914138210  | 6.22608046302147  | 1.15587898679151  |
| Si | -8.29754224832581 | 0.03435585567590  | 1.10649765272955  |
| Si | -4.79721300493076 | 2.12658140205575  | 1.05099673615397  |
| Si | -1.27072517459800 | 4.05921098672925  | 1.10970155735971  |
| Si | 2.31380090095028  | 6.03764080697920  | 1.13399065166647  |
| Si | -9.54681166502756 | 2.05111819610488  | 1.10233470932135  |
| Si | -5.99763390585169 | 4.16150339656354  | 1.05467246999992  |
| Si | -2.52796910671144 | 6.05915232158553  | 1.08019908911584  |
| Si | 1.09754813150152  | 8.07691667462617  | 1.08031579189651  |
| Si | -8.37395375062102 | 4.14406122762623  | 1.07747286462385  |
| Si | -4.90124675346224 | 6.26719349074177  | 1.06220863785447  |
| Si | -1.30664317588828 | 8.09185273520900  | 1.07577217367986  |
| H  | 1.95068860139281  | -9.00984360186924 | 2.06501998231851  |
| H  | 1.87836784326664  | -9.20187335243938 | -2.00816176404096 |
| H  | -5.16689953145717 | -7.18329093732043 | -2.04807216096444 |
| H  | -8.78323106078281 | -5.17736422073452 | -2.03475268591455 |
| H  | -9.10977843810224 | 5.15534108506918  | -2.15210891529294 |
| H  | -5.44997682113955 | 7.33328145155227  | -2.22415442666414 |
| H  | -1.82674999579493 | 9.20074627912427  | -2.17748856643526 |
| H  | 1.67567746971604  | 9.11231514111617  | -2.17769508785246 |
| H  | 5.28495519521958  | 7.27430822060004  | -2.13971376425086 |
| H  | 8.72724733185258  | 5.16322511266889  | -2.17320991978828 |
| H  | 9.09597814490509  | -5.08672638519611 | -2.17580326046878 |
| H  | 5.57104289236188  | -7.31629083303629 | -2.18271017478223 |
| H  | 5.52199033394311  | -7.31000986005354 | 1.96354993429435  |
| H  | 9.10458558760106  | -5.08664056170447 | 1.90407042160982  |
| H  | 8.85043397601206  | 5.18735260214423  | 1.90154029985655  |
| H  | 5.27304753123657  | 7.29940275572593  | 2.01992606826311  |
| H  | 1.64492585544690  | 9.22011556819889  | 1.88169971261807  |
| H  | -1.84917076069368 | 9.21515267441503  | 1.90747775173906  |

|   |                    |                   |                   |
|---|--------------------|-------------------|-------------------|
| H | -5.50700599839656  | 7.35055845530932  | 1.90213876496345  |
| H | -9.05868938622666  | 5.18610871995301  | 1.90926182916438  |
| H | -8.73572805045285  | -5.11350607718517 | 2.02667726080463  |
| H | -5.12426738864577  | -7.08146198448700 | 2.09647561086961  |
| H | -1.61537513153156  | -9.09269346524669 | -1.99965434382381 |
| H | -1.57249264312040  | -8.99664885127480 | 2.07497064653435  |
| C | -0.47818066954406  | -0.60981484466049 | 3.66471893201837  |
| O | -1.01844715623093  | -1.77747298100054 | 3.98459301482146  |
| O | 0.80077284229823   | -0.52128602303096 | 3.43354262383984  |
| H | -1.11163681415258  | 0.26175790757821  | 3.87758866939099  |
| H | -0.41493279849566  | -2.50086789972356 | 3.68933828529407  |
| H | -10.65422197981851 | -2.15544699747762 | 1.99860206993174  |
| H | -10.67156846663419 | -2.23261637584330 | -2.09641404962360 |
| H | -10.78139663139792 | 2.10093940920077  | 1.95072987109131  |
| H | -10.81874847736051 | 2.08492414850862  | -2.12502179383156 |
| H | 10.77864470625818  | -1.96787235192051 | 1.88092481166267  |
| H | 10.70728514380859  | -1.93099983823674 | -2.20877727536606 |
| H | 10.61646962501526  | 2.15980541614754  | 1.91656895719666  |
| H | 10.56170422758080  | 2.15607958484732  | -2.19650690672111 |

• **TS 2Si-CO + H<sub>2</sub> → 2Si-OCH**

|    |                   |                   |                   |
|----|-------------------|-------------------|-------------------|
| Si | 1.28823625627511  | 8.06968131966934  | -1.26126493492622 |
| Si | -1.11289718537965 | 8.10193543072755  | -1.25460920163230 |
| Si | -2.31676731465299 | 6.06168911642481  | -1.25320235558677 |
| Si | -4.68986427437175 | 6.22142859511986  | -1.25201788104329 |
| Si | -5.74788407708726 | 4.09232114730656  | -1.23690189681839 |
| Si | -8.12051685479643 | 4.11719066926037  | -1.23337475105665 |
| Si | -9.36210833932082 | 2.05933799214163  | -1.23118959015489 |
| Si | 2.46672465223046  | 6.01006746146214  | -1.26373598141561 |
| Si | -1.11320919463679 | 4.02955373942878  | -1.25915765054377 |
| Si | -4.61202305355721 | 2.01765982721689  | -1.24513785039106 |
| Si | -8.17551513267066 | 0.00994930529707  | -1.23629672869540 |
| Si | 4.83306675911849  | 6.16248947953379  | -1.28161808740840 |
| Si | 1.23952225117706  | 3.98549199835188  | -1.25686522419410 |
| Si | -2.25058065805409 | 1.97440639420703  | -1.24201208570417 |
| Si | -5.82275764328680 | 0.00000070027766  | -1.24265906749009 |
| Si | -9.39618734955312 | -2.02102088158960 | -1.22906169263166 |
| Si | -8.18552096615947 | -4.09628412541065 | -1.23137683873900 |
| Si | -4.63213207488841 | -2.03475588973968 | -1.24986574675165 |
| Si | -1.00613135139507 | -0.03160260738071 | -1.32772122829557 |
| Si | 2.25714597037245  | 1.85326618397188  | -1.33423025652232 |
| Si | 5.80167123902233  | 3.99662720726971  | -1.27439609788804 |
| Si | 4.60581023137357  | 1.95787037510745  | -1.27170394383662 |

|    |                   |                   |                   |
|----|-------------------|-------------------|-------------------|
| Si | 1.26092068784174  | -0.19946617400323 | -1.72963393819100 |
| Si | -2.27865497263786 | -2.00880020779414 | -1.25229950510032 |
| Si | -5.81282483047427 | -4.08047346923032 | -1.24043833406367 |
| Si | 8.17100911494503  | 3.97572234358395  | -1.27548750332185 |
| Si | 9.30044180114661  | 1.86383585938515  | -1.27607220910228 |
| Si | 5.67655241409834  | -0.13329883690281 | -1.27645797568815 |
| Si | 2.28116739314380  | -2.05648634075804 | -2.50085191851403 |
| Si | -1.10148740060395 | -4.03606326101013 | -1.26061623908562 |
| Si | -4.72511547015511 | -6.19227848693940 | -1.25390666541118 |
| Si | 8.03301478170510  | -0.13582884511964 | -1.27608975151117 |
| Si | 4.28792623286555  | -2.03864488985339 | -1.30328402901133 |
| Si | 1.24142674398324  | -3.77499865569717 | -1.29990662944596 |
| Si | -2.34977869652437 | -6.04568559267211 | -1.25267753572669 |
| Si | 9.30063943544140  | -2.12882824391952 | -1.27270871754553 |
| Si | 5.62895266024281  | -3.98341818061087 | -1.26249340278172 |
| Si | 2.25705225814766  | -5.90809605888144 | -1.25568152553822 |
| Si | -1.22419628202620 | -8.12590253852203 | -1.25091369771918 |
| Si | 7.99369600028685  | -4.13014933615491 | -1.26638848580083 |
| Si | 4.61540453005348  | -6.12241029236438 | -1.26303422602279 |
| Si | 1.16566723847477  | -8.01136970475177 | -1.25422028197020 |
| Si | 1.29502687733640  | 8.07014613403379  | 1.14304021525919  |
| Si | -1.10559003515362 | 8.09931518134640  | 1.15164528249079  |
| Si | -2.30627033745178 | 6.05645444948363  | 1.15247036427097  |
| Si | -4.67965935722504 | 6.21894071044903  | 1.17146238670131  |
| Si | -5.74131828676774 | 4.09184080830612  | 1.16255987792096  |
| Si | -8.11406384232135 | 4.11740861626384  | 1.16930587511931  |
| Si | -9.35559184626169 | 2.05969369030436  | 1.17377297826870  |
| Si | 2.47171580252702  | 6.01083673274102  | 1.13820207274560  |
| Si | -1.10357524738016 | 4.02262747516101  | 1.14125888118274  |
| Si | -4.60517979899984 | 2.01807069747883  | 1.15912370532666  |
| Si | -8.16883475537968 | 0.01075807174926  | 1.17117600495215  |
| Si | 4.83781434164031  | 6.16359531041882  | 1.14314270742172  |
| Si | 1.24782776038827  | 3.98678171522727  | 1.15274393920098  |
| Si | -2.24573502647962 | 1.97161398225292  | 1.16134028880205  |
| Si | -5.81622763880919 | 0.00035478975759  | 1.16575694861538  |
| Si | -9.38982185005885 | -2.01964261793942 | 1.17410173323659  |
| Si | -8.17831640475321 | -4.09404815375345 | 1.17258218305241  |
| Si | -4.62429968793925 | -2.03301335591352 | 1.15782800870433  |
| Si | -0.99998568115690 | -0.02706211025097 | 1.08435656654675  |
| Si | 2.26097211592198  | 1.86024047454618  | 1.07486978832279  |
| Si | 5.80331140020537  | 3.99717819216434  | 1.12950222968633  |
| Si | 4.60804894209293  | 1.95867665038548  | 1.11903124955804  |
| Si | 1.20417672532598  | -0.07991720645492 | 1.87825910311696  |
| Si | -2.27023779756149 | -2.00454039870696 | 1.13937413689799  |

|    |                   |                   |                   |
|----|-------------------|-------------------|-------------------|
| Si | -5.80566394275159 | -4.07887322735392 | 1.16502897428642  |
| Si | 8.17246030389253  | 3.97597812073930  | 1.13048229237962  |
| Si | 9.30214663028904  | 1.86536791030222  | 1.12942501440870  |
| Si | 5.67721096832068  | -0.13057244727317 | 1.12463385896716  |
| Si | 2.29520212326793  | -2.06512726925353 | 2.37849472352460  |
| Si | -1.09615098540762 | -4.03154719607807 | 1.13611635063322  |
| Si | -4.71898093271891 | -6.19050596703342 | 1.16819681111516  |
| Si | 8.03284890190860  | -0.13256079057227 | 1.12886805559531  |
| Si | 4.28705098767121  | -2.03140403897012 | 1.16623518381598  |
| Si | 1.24377589719440  | -3.76652919916443 | 1.17310644022135  |
| Si | -2.34444937964081 | -6.04017202679709 | 1.14918005289328  |
| Si | 9.30140665473965  | -2.12409920080604 | 1.13331641712673  |
| Si | 5.62697331858329  | -3.97458010764769 | 1.13553121316314  |
| Si | 2.25791950223595  | -5.89836738353718 | 1.14361197443831  |
| Si | -1.22087892574732 | -8.12067395540765 | 1.15439475767117  |
| Si | 7.99259348660888  | -4.12325803311434 | 1.13555301719317  |
| Si | 4.61489342206690  | -6.11304735014286 | 1.14722076927785  |
| Si | 1.16798758884049  | -8.00354550951207 | 1.15072588114855  |
| H  | -1.64547213395639 | 9.21638530065498  | 1.99260112704235  |
| H  | -1.65471632658545 | 9.22254895441613  | -2.08964024085890 |
| H  | 5.45370230412316  | 7.20717566277626  | -2.15815555058255 |
| H  | 8.86961430281689  | 4.99745653290934  | -2.12067486114219 |
| H  | 8.59271530639533  | -5.21733347867084 | -2.10671759839008 |
| H  | 5.21054424029485  | -7.16728205483631 | -2.15844485798639 |
| H  | 1.79273696316774  | -9.08426168547572 | -2.09275470209798 |
| H  | -1.77140861167180 | -9.22929113596432 | -2.10490960292745 |
| H  | -5.33223271903085 | -7.25999505666055 | -2.11241663287704 |
| H  | -8.87263989731507 | -5.13582503758982 | -2.06437855773317 |
| H  | -8.79371093413491 | 5.16582965254174  | -2.06651865501509 |
| H  | -5.30157362250515 | 7.28293608639444  | -2.11459854394783 |
| H  | -5.28205842052613 | 7.28045639086247  | 2.04053427705020  |
| H  | -8.78293754986820 | 5.16641980714086  | 2.00542248086463  |
| H  | -8.85873199656655 | -5.13252009610036 | 2.01235080236292  |
| H  | -5.31560977671010 | -7.25993290274502 | 2.03191619299023  |
| H  | -1.76692125204820 | -9.21823623671391 | 2.01658879957099  |
| H  | 1.80198989585643  | -9.06867587799974 | 1.99401785242909  |
| H  | 5.21051225124937  | -7.15065454421482 | 2.05074784794139  |
| H  | 8.58642867236086  | -5.20894839160255 | 1.98157713292686  |
| H  | 8.86891688900035  | 4.99874428725193  | 1.97609346029398  |
| H  | 5.46629264131695  | 7.20604319228539  | 2.01682642450822  |
| H  | 1.85504822434865  | 9.17379577518712  | -2.10160639933583 |
| H  | 1.86876956649747  | 9.17391469194118  | 1.97905107545259  |
| C  | 0.78837712929294  | 0.64154568040696  | 3.70039834731440  |
| O  | 0.27687903019250  | 1.53020597800542  | 4.25721205477543  |

|   |                    |                   |                   |
|---|--------------------|-------------------|-------------------|
| H | 1.50450396975377   | -0.63004048257082 | 4.60299660900823  |
| H | 1.90600199831051   | -1.35454549696975 | 4.29010780524836  |
| H | 10.53967742740848  | 1.88650019819499  | 1.97490816599244  |
| H | 10.53723979472169  | 1.88829508681207  | -2.12256778343183 |
| H | 10.52045507692070  | -2.19079910872857 | 2.00244719505561  |
| H | 10.52026704597972  | -2.20048297091869 | -2.14063888777617 |
| H | -10.60046278061025 | 2.15218264873974  | -2.07040050535982 |
| H | -10.58935982906380 | 2.15116024282316  | 2.01985428741013  |
| H | -10.63455735200902 | -2.08977402111253 | -2.07029284358226 |
| H | -10.62366804821220 | -2.08705028433574 | 2.02207063282379  |

• **TS 2Si-HCOOH → 2Si-(OH)<sub>2</sub>CH**

|    |                   |                   |                   |
|----|-------------------|-------------------|-------------------|
| Si | -1.41953618032092 | -8.03558455081117 | -1.18978507992627 |
| Si | 0.97081781655007  | -7.96535686912033 | -1.15077993413367 |
| Si | 2.14406167911363  | -5.90648586735114 | -1.12378875854682 |
| Si | 4.49403934480573  | -6.17398358918966 | -1.18856849157390 |
| Si | 5.64015566490783  | -4.10217405882500 | -1.24299658647383 |
| Si | 7.99217108092587  | -4.23889004611381 | -1.44487164270750 |
| Si | 9.23955535401568  | -2.20508027158772 | -1.58659085534133 |
| Si | -2.61583472376474 | -5.99004989234198 | -1.21325527929404 |
| Si | 0.97833549648698  | -3.85862534066778 | -1.10027041907056 |
| Si | 4.58000917515827  | -1.99858818828784 | -1.15224285691279 |
| Si | 8.10632353553084  | -0.12333457943453 | -1.49527160490491 |
| Si | -4.98201953429441 | -6.13362160019745 | -1.37886376437019 |
| Si | -1.35814973209845 | -4.00184842214803 | -1.11372321757045 |
| Si | 2.25342753161687  | -1.89084087149587 | -1.00485381220207 |
| Si | 5.77368451960612  | 0.00911108968247  | -1.21165734669064 |
| Si | 9.43054484627794  | 1.81529684722665  | -1.71083038537976 |
| Si | 8.17558450431317  | 3.84920729731306  | -1.68963039679252 |
| Si | 4.37488386117945  | 1.92505226196397  | -1.14694773533259 |
| Si | 1.29182540830162  | 0.27860230728842  | -0.96265444531168 |
| Si | -2.46763116640770 | -1.95036219821758 | -1.06594514981730 |
| Si | -6.01879419277094 | -3.98966947631143 | -1.42233146488771 |
| Si | -4.82833675255889 | -1.93988529398328 | -1.26307564257513 |
| Si | -1.01217680207053 | -0.09920830606137 | -0.70046937799844 |
| Si | 2.35249372483798  | 1.86339149504792  | -2.36876465967915 |
| Si | 5.82215538150587  | 3.80925796599936  | -1.32449117839256 |
| Si | -8.38562101063025 | -3.85000741627146 | -1.65411453702206 |
| Si | -9.49242978472556 | -1.71667763852050 | -1.66856767450555 |
| Si | -5.88822150602404 | 0.15521968295712  | -1.30833274282164 |
| Si | -2.20483229493850 | 1.92788781537715  | -0.97909753470785 |
| Si | 1.50585965163397  | 3.66203313789823  | -1.12681616645964 |
| Si | 4.85888842991052  | 5.98172459922228  | -1.35061025497382 |



|    |                   |                   |                   |
|----|-------------------|-------------------|-------------------|
| Si | -8.22198584903340 | 0.27383182388875  | -1.50420295998021 |
| Si | -4.54964034061954 | 2.07066396996022  | -1.15197958581082 |
| Si | -0.84489291950640 | 3.83592616024636  | -1.01600075866867 |
| Si | 2.50546107707774  | 5.80986827714689  | -1.22007544826171 |
| Si | -9.29821258393765 | 2.38223995507815  | -1.55630291172395 |
| Si | -5.58253070059716 | 4.19142419991142  | -1.23880400336859 |
| Si | -2.01128092144199 | 5.88383818182203  | -1.09488665970370 |
| Si | 1.45179112955667  | 7.93335686777462  | -1.20824566310852 |
| Si | -7.93946712133544 | 4.35387072883353  | -1.45104996653308 |
| Si | -4.35409207801514 | 6.21378822067597  | -1.16838270111720 |
| Si | -0.92639146831688 | 7.98054452951843  | -1.14306300533264 |
| Si | -1.46752055434033 | -8.01644147643934 | 1.21274838479269  |
| Si | 0.95104359714655  | -7.94894041492851 | 1.25337302239235  |
| Si | 2.19500003212133  | -5.92294065719722 | 1.27329118690304  |
| Si | 4.57728126241635  | -6.16660801143231 | 1.23382967887065  |
| Si | 5.81394155372384  | -4.12909105605681 | 1.15162568640546  |
| Si | 8.17854443947496  | -4.21098568382923 | 0.95096649328731  |
| Si | 9.46349346787297  | -2.17239255108795 | 0.80719146937875  |
| Si | -2.74729751182281 | -6.02020085556149 | 1.18684630246721  |
| Si | 0.95331403754697  | -3.89516597677497 | 1.31872871662271  |
| Si | 4.75634693939537  | -2.02065074866526 | 1.25239515529580  |
| Si | 8.38369817239091  | -0.06553170540617 | 0.89206318004885  |
| Si | -5.13344075681998 | -6.18180538087802 | 1.03838626560757  |
| Si | -1.44734652074313 | -4.03346291429945 | 1.29648474896027  |
| Si | 2.40024088942192  | -1.99796622272152 | 1.38528101078383  |
| Si | 6.04465615732450  | -0.03062054167061 | 1.17841088594490  |
| Si | 9.67663838871865  | 1.91550439164443  | 0.67774063701365  |
| Si | 8.51413181153556  | 4.01665468447002  | 0.68251602821658  |
| Si | 4.97190473513530  | 2.04802283113521  | 1.31493986595562  |
| Si | 1.69589156533234  | 0.23598133156334  | 1.41793302367031  |
| Si | -2.79748984256973 | -2.10105519324888 | 1.29650554729910  |
| Si | -6.25722715303956 | -4.08069323641059 | 0.96461804820969  |
| Si | -5.11570214379311 | -2.03799457985042 | 1.12052505784068  |
| Si | -1.60464144572523 | -0.15955071349837 | 1.65110476852375  |
| Si | 2.87476552132583  | 2.09256989139973  | 2.18276121761142  |
| Si | 6.18046789693675  | 4.01347784619558  | 1.04196130514651  |
| Si | -8.61291746637681 | -3.93991449824822 | 0.73424202439051  |
| Si | -9.68924093839552 | -1.78072101314334 | 0.72624891654893  |
| Si | -6.07048601038868 | 0.12158615109727  | 1.10239672446260  |
| Si | -2.42114274639889 | 2.01654393540313  | 1.39426915697466  |
| Si | 1.52751183457618  | 3.79134052582104  | 1.33606557557333  |
| Si | 5.00882093659602  | 6.07378398485340  | 1.05558250056998  |
| Si | -8.41599474650689 | 0.22284993433355  | 0.89095372691303  |
| Si | -4.77125387947778 | 2.10362617764909  | 1.25219210346440  |

|    |                    |                   |                   |
|----|--------------------|-------------------|-------------------|
| Si | -0.87173276012045  | 3.83433178646338  | 1.38981654736269  |
| Si | 2.63543897892781   | 5.86785139111905  | 1.16986163376790  |
| Si | -9.45866288594017  | 2.35511125299878  | 0.84127543868785  |
| Si | -5.76447797221249  | 4.22943413747634  | 1.15563958134187  |
| Si | -2.05201593273505  | 5.91302693761796  | 1.30344080118798  |
| Si | 1.50727847787372   | 7.94475758773878  | 1.19589645318151  |
| Si | -8.12389613855138  | 4.36632800817351  | 0.94572815373465  |
| Si | -4.43191460213788  | 6.20583482211539  | 1.25284159323338  |
| Si | -0.89567145929836  | 7.98327023287521  | 1.26201812010225  |
| H  | 1.46327523809774   | -9.08022727940965 | 2.09473005846791  |
| H  | 1.60075521181749   | -9.04901577028114 | -1.97264254941588 |
| H  | -5.52138555616051  | -7.20495720951683 | -2.27660084424572 |
| H  | -9.03759044971378  | -4.81920600268462 | -2.59333159957074 |
| H  | -8.45510596705030  | 5.44667341543798  | -2.33778198057395 |
| H  | -4.82573648828762  | 7.33939898580662  | -2.03767153126024 |
| H  | -1.56572511519467  | 9.03859074084315  | -1.98984853801354 |
| H  | 2.06937621749482   | 8.98560499211183  | -2.07810566412447 |
| H  | 5.45267961107352   | 6.98405104574225  | -2.29335272001047 |
| H  | 8.66842801218747   | 4.86266976619178  | -2.67773196503006 |
| H  | 8.53572713369508   | -5.32444396321562 | -2.32308131220062 |
| H  | 5.01983099049396   | -7.26954917092071 | -2.06498598796075 |
| H  | 5.12934130814112   | -7.26422536071091 | 2.09255420758705  |
| H  | 8.91968651173570   | -5.23887407649058 | 1.75223561372196  |
| H  | 9.30889318339386   | 5.09844803027705  | 1.34933326238841  |
| H  | 5.61031038292032   | 7.16815225931503  | 1.88590917475976  |
| H  | 2.09836094159290   | 9.04192729970983  | 2.02993782570080  |
| H  | -1.39201035403839  | 9.10696829172690  | 2.12277915229461  |
| H  | -4.96975824354128  | 7.31729902710040  | 2.10314193231833  |
| H  | -8.84636894578150  | 5.42819028602202  | 1.71943111150928  |
| H  | -9.44685195924696  | -4.96024322212424 | 1.44812931572559  |
| H  | -5.78546622554749  | -7.28077088912441 | 1.82122493142140  |
| H  | -1.96640627530789  | -9.14448077754081 | -2.03651588646310 |
| H  | -1.95522084128257  | -9.16039775619953 | 2.05066568664734  |
| C  | -0.50786294977273  | -0.21409885266014 | 3.24742291997188  |
| O  | -0.12104824246972  | -1.41910311483693 | 3.80008793898575  |
| O  | 0.64273297323720   | 0.61136747991341  | 2.83130767574803  |
| H  | -0.98371755356923  | 0.37416284035630  | 4.05059321482540  |
| H  | 0.04547903193496   | -2.06722377012227 | 3.08016170585355  |
| H  | -10.99993625882280 | -1.83284188459196 | 1.45214342050810  |
| H  | -10.66990599381474 | -1.70657392829192 | -2.59588168002493 |
| H  | -10.74136963509369 | 2.52652556496976  | 1.59806857790398  |
| H  | -10.47041529138832 | 2.53769986558664  | -2.47678252836827 |
| H  | 10.76630276964984  | -2.32423586860463 | 1.53373902226365  |
| H  | 10.39420670672181  | -2.28757836729342 | -2.53834611217466 |

|   |                   |                  |                   |
|---|-------------------|------------------|-------------------|
| H | 10.98448482144519 | 1.98557145786501 | 1.40660413021842  |
| H | 10.57055018264719 | 1.80433615824216 | -2.68244031415430 |
| H | 2.30717599829900  | 1.77058491693004 | 3.85037573119655  |
| H | 1.49850834120104  | 1.24334249178150 | 3.62240452481320  |

• TS 2Si-OCH → 2Si...OCH<sub>2</sub>

|    |                   |                   |                   |
|----|-------------------|-------------------|-------------------|
| Si | -1.24516039942406 | -8.08626512069225 | -1.24313135354588 |
| Si | 1.15394172050730  | -8.10087454985164 | -1.24213335676584 |
| Si | 2.32594844090040  | -6.04444119198785 | -1.24698565171368 |
| Si | 4.69795762171751  | -6.20491449695336 | -1.25225726272898 |
| Si | 5.75642625342713  | -4.07826271137244 | -1.24005352047566 |
| Si | 8.129566111114399 | -4.10808339364613 | -1.22807452612110 |
| Si | 9.38488669221416  | -2.05779624737717 | -1.22127488455701 |
| Si | -2.44884508915035 | -6.04197065814060 | -1.23081329374007 |
| Si | 1.10508620855245  | -4.02320882169985 | -1.24298023500869 |
| Si | 4.60956040518298  | -2.00959059940885 | -1.25346632005575 |
| Si | 8.19936604789536  | -0.00830109098071 | -1.23057679889787 |
| Si | -4.80850313060860 | -6.25363997053154 | -1.23148729369710 |
| Si | -1.24571312352771 | -4.00023256862227 | -1.24417254794011 |
| Si | 2.24730130080505  | -1.97437570267915 | -1.26800829139177 |
| Si | 5.84730321327275  | -0.00884949364456 | -1.24484220853795 |
| Si | 9.39177252446469  | 2.03895211611990  | -1.21798769268809 |
| Si | 8.14445385700871  | 4.09261812428718  | -1.22409294045764 |
| Si | 4.61535433658757  | 1.99662320296493  | -1.24848452074572 |
| Si | 0.95329265209515  | -0.00330739255823 | -1.30630082999082 |
| Si | -2.24078621399279 | -1.86153716608620 | -1.26182237701567 |
| Si | -5.77198565530801 | -4.08986061186470 | -1.21876704415470 |
| Si | -4.57309040752132 | -2.05511237586578 | -1.22201209003248 |
| Si | -1.24838306558516 | 0.10019544576960  | -1.94265753319512 |
| Si | 2.26313746729733  | 1.94054509598277  | -1.25990463827434 |
| Si | 5.77190285184127  | 4.05600841056134  | -1.23837534273101 |
| Si | -8.14003489992202 | -4.08481959682490 | -1.23760877814724 |
| Si | -9.31064194721633 | -1.99700332209128 | -1.26350634587128 |
| Si | -5.69798605648711 | 0.00422490050147  | -1.24195340738173 |
| Si | -2.32233565938171 | 1.99619118967802  | -2.48284888403638 |
| Si | 1.11324464440641  | 3.98050473167821  | -1.29456057120545 |
| Si | 4.70036777086571  | 6.17555975564256  | -1.26399006769713 |
| Si | -8.05686530709069 | 0.01095240437019  | -1.26893003120483 |
| Si | -4.32283271444080 | 1.92185859867246  | -1.27428472036239 |
| Si | -1.23412102208113 | 3.73804768175533  | -1.35084111330880 |
| Si | 2.32804082220565  | 6.01181101016692  | -1.28679038606222 |
| Si | -9.32046187423686 | 2.00547748321280  | -1.28346930333349 |
| Si | -5.65622986247817 | 3.87891704813327  | -1.23292323485711 |

|    |                   |                   |                   |
|----|-------------------|-------------------|-------------------|
| Si | -2.29857869581382 | 5.85578607506776  | -1.28415976596612 |
| Si | 1.17268328738900  | 8.07590133018808  | -1.28224032312821 |
| Si | -8.02284410463042 | 4.01325800388217  | -1.28032552560637 |
| Si | -4.66033375704783 | 6.02856674449524  | -1.29138616637607 |
| Si | -1.21926110172463 | 7.96420980660971  | -1.28833582449290 |
| Si | -1.24908429230449 | -8.09204278109690 | 1.16084343612280  |
| Si | 1.15028016890831  | -8.09508819210349 | 1.16522109969727  |
| Si | 2.31879610992567  | -6.03555581389464 | 1.15934238195347  |
| Si | 4.68971702415442  | -6.20215588107844 | 1.17241952179017  |
| Si | 5.74329356089021  | -4.07332437721118 | 1.15967023787524  |
| Si | 8.11573520118663  | -4.10625075231247 | 1.17475205978153  |
| Si | 9.37044016609154  | -2.05668264715780 | 1.18352077422903  |
| Si | -2.44374538717811 | -6.04342526092724 | 1.17114145779838  |
| Si | 1.10203364042454  | -4.00991625124842 | 1.16147617166790  |
| Si | 4.59419358395996  | -2.00827938517518 | 1.15260057494258  |
| Si | 8.18232024837262  | -0.00822311064035 | 1.17701383685508  |
| Si | -4.80623881352002 | -6.24396516289563 | 1.19108301815735  |
| Si | -1.25290213335601 | -3.99996645426482 | 1.15855327655305  |
| Si | 2.23627145438885  | -1.95258168687246 | 1.12929873681865  |
| Si | 5.83004416413766  | -0.00787864905918 | 1.16139040084427  |
| Si | 9.37653705376645  | 2.03758593617647  | 1.18500478667229  |
| Si | 8.13040525549784  | 4.09182602645525  | 1.17976562246346  |
| Si | 4.59186167864366  | 1.99694553840554  | 1.15824865267860  |
| Si | 0.88940376097210  | -0.01225961206326 | 1.15672266562438  |
| Si | -2.21215428631345 | -1.84078598328181 | 1.21179661568283  |
| Si | -5.78274155127307 | -4.08193892871754 | 1.18395655263720  |
| Si | -4.56011854183472 | -2.05080272877912 | 1.17206274354456  |
| Si | -1.07990683083238 | -0.15541011307250 | 2.39708771550914  |
| Si | 2.23337735663353  | 1.92072252244258  | 1.13776392557479  |
| Si | 5.75729495531414  | 4.05369712947666  | 1.16484045736519  |
| Si | -8.15437287825830 | -4.07512401744755 | 1.16659288638270  |
| Si | -9.32821612013645 | -1.98743462396621 | 1.14223082539262  |
| Si | -5.72314256108495 | -0.00450347394337 | 1.15428794211243  |
| Si | -2.21785757641416 | 1.82105381804424  | 1.88231053177851  |
| Si | 1.10359149856556  | 3.96813448004364  | 1.10391773051770  |
| Si | 4.67826833025814  | 6.16806294472034  | 1.15947058460461  |
| Si | -8.07611030883309 | 0.01893666110310  | 1.13713997222440  |
| Si | -4.42692342516442 | 1.94965651351683  | 1.19577367384015  |
| Si | -1.22791325315091 | 3.76838050653139  | 1.09115467033989  |
| Si | 2.30668662990114  | 6.00001675701107  | 1.11601757513914  |
| Si | -9.33858351215751 | 2.01439457009275  | 1.12312126864068  |
| Si | -5.69267980718724 | 3.93217260997949  | 1.16581979410149  |
| Si | -2.31491662496639 | 5.85595835235389  | 1.11807987240412  |
| Si | 1.16735319192987  | 8.07039861880267  | 1.12378249861743  |

|    |                    |                   |                   |
|----|--------------------|-------------------|-------------------|
| Si | -8.05910577876861  | 4.03364401261291  | 1.12177240991915  |
| Si | -4.66988068309024  | 6.06252278071944  | 1.11962879098232  |
| Si | -1.22135249069513  | 7.95942707032701  | 1.11743131592332  |
| H  | 1.70586686861073   | -9.20107891558519 | 2.01084874534146  |
| H  | 1.70346252280427   | -9.21461840023228 | -2.08154993148110 |
| H  | -5.43328363762784  | -7.29494504633388 | -2.10933835773163 |
| H  | -8.81363440119639  | -5.12519250322919 | -2.08012827583049 |
| H  | -8.61168616328207  | 5.09039849601532  | -2.13996907160664 |
| H  | -5.29076048620033  | 7.04092226870112  | -2.19922303431985 |
| H  | -1.84254652699594  | 9.03918005277065  | -2.12675088485382 |
| H  | 1.70660532487728   | 9.18846849917049  | -2.13268990596699 |
| H  | 5.31786068560009   | 7.23800266024598  | -2.12170689643340 |
| H  | 8.81728779764834   | 5.14454697378320  | -2.05354627310024 |
| H  | 8.80347266104915   | -5.15887898875077 | -2.05827648185912 |
| H  | 5.30143732823294   | -7.26760390489553 | -2.11945368504907 |
| H  | 5.29555869419969   | -7.25945903967791 | 2.04449443213713  |
| H  | 8.77640337961512   | -5.15937162508021 | 2.01253941523503  |
| H  | 8.79494857416730   | 5.14198379065749  | 2.01809197965463  |
| H  | 5.25533378074202   | 7.24037780516519  | 2.03285305886110  |
| H  | 1.70294294791406   | 9.17110636929862  | 1.98829667663548  |
| H  | -1.85964900703037  | 9.02245977982558  | 1.96009039917833  |
| H  | -5.25416225796319  | 7.11656959988875  | 2.01058703267205  |
| H  | -8.68187112108993  | 5.11807426742561  | 1.94821573517427  |
| H  | -8.84981176359324  | -5.09978069841982 | 2.01094059908819  |
| H  | -5.41391184586526  | -7.29321186368311 | 2.07161903963526  |
| H  | -1.80847023151449  | -9.19002467729528 | -2.08671275053413 |
| H  | -1.81068361482277  | -9.20493864722789 | 1.99343402333335  |
| C  | -1.12110229474342  | 1.56080186459631  | 4.21408523710150  |
| O  | -0.08466547928807  | 2.17533979750522  | 4.31278339273252  |
| H  | -1.70425765315968  | 1.01506827548777  | 4.98003377696814  |
| H  | -2.11705466873669  | 2.18509687225745  | 3.53810275753226  |
| H  | 10.60764904189773  | 2.12487196006090  | 2.03524203885512  |
| H  | 10.63287937517684  | 2.13078057739923  | -2.05313857794078 |
| H  | 10.60019775217529  | -2.15281232235217 | 2.03494916612490  |
| H  | 10.62476240961222  | -2.15642348824617 | -2.05768039266102 |
| H  | -10.56309902088759 | 2.08787877755934  | 1.98386312499539  |
| H  | -10.53558150657893 | 2.07703183071429  | -2.15727971554453 |
| H  | -10.56830507268335 | -2.01722726420845 | 1.98352847289041  |
| H  | -10.53803647057774 | -2.04122471177682 | -2.12248029149281 |

• **TS 2Si-(OH)<sub>2</sub>CH → 2Si-CHO + H<sub>2</sub>O**

|    |                   |                  |                   |
|----|-------------------|------------------|-------------------|
| Si | 1.14143552947159  | 8.05907197544006 | -1.14044129860302 |
| Si | -1.24344871499551 | 7.91250026549866 | -1.10071516292526 |

|    |                   |                   |                   |
|----|-------------------|-------------------|-------------------|
| Si | -2.35053165441052 | 5.81574948185658  | -1.09099883061999 |
| Si | -4.70912415758765 | 6.02661510557139  | -1.17544969723497 |
| Si | -5.80435142714612 | 3.92858413136431  | -1.25415163452807 |
| Si | -8.16254727385035 | 3.94999808265148  | -1.47565307883797 |
| Si | -9.32365484186631 | 1.86058018843161  | -1.60246185588962 |
| Si | 2.39740526519333  | 6.05081779632975  | -1.17873596609768 |
| Si | -1.11833237702101 | 3.80918242129083  | -1.06372969673118 |
| Si | -4.67252859531964 | 1.85773268298363  | -1.17155826660653 |
| Si | -8.10509150890569 | -0.17102100532604 | -1.52734038756634 |
| Si | 4.75304056809344  | 6.27858012289839  | -1.36928740638635 |
| Si | 1.21068563237299  | 4.02058541701700  | -1.09515471612024 |
| Si | -2.34274697702730 | 1.81570552081674  | -0.97320499225875 |
| Si | -5.76750967038582 | -0.20191620215305 | -1.27675755208364 |
| Si | -9.34716524895700 | -2.16854500896168 | -1.72302540941663 |
| Si | -8.01757042182023 | -4.15683162876259 | -1.68984111404253 |
| Si | -4.30085289656692 | -2.06829922300668 | -1.21288627929136 |
| Si | -1.30297964375820 | -0.31398251642615 | -0.83824700639749 |
| Si | 2.39768960395504  | 2.01315351175272  | -1.08443524664386 |
| Si | 5.87023488078506  | 4.17559987323235  | -1.43692983602368 |
| Si | 4.76007981658777  | 2.07933852207039  | -1.28328694941945 |
| Si | 1.00214524920729  | 0.10999086310314  | -0.72193330061728 |
| Si | -2.21798469404093 | -1.89889382077347 | -2.34657224833970 |
| Si | -5.66268691173004 | -4.02518105867722 | -1.38751563383865 |
| Si | 8.23751524270243  | 4.11525179891227  | -1.69725704721490 |
| Si | 9.41724610227099  | 2.02115281247740  | -1.72944283852438 |
| Si | 5.88756777650975  | 0.01932045384806  | -1.33154651590632 |
| Si | 2.26398971505889  | -1.88156906326406 | -0.97389943025175 |
| Si | -1.38230333278046 | -3.67611183560054 | -1.05031323756331 |
| Si | -4.62676044006806 | -6.15872351229382 | -1.34339756622238 |
| Si | 8.22261995493001  | -0.01544423701205 | -1.55485228875431 |
| Si | 4.61233021506209  | -1.93852065562493 | -1.16298779109882 |
| Si | 0.96731655939397  | -3.83215846832337 | -0.97445763463977 |
| Si | -2.29130412268463 | -5.85840809596409 | -1.16521482698196 |
| Si | 9.36935083615038  | -2.08634214093224 | -1.62419063315607 |
| Si | 5.71910817880113  | -4.02232215207247 | -1.25916146077108 |
| Si | 2.20827767512079  | -5.83501432833051 | -1.07790095361131 |
| Si | -1.18179465474389 | -7.95399806956269 | -1.16370973347882 |
| Si | 8.07761309805487  | -4.10182529322471 | -1.50485844189004 |
| Si | 4.55882509727947  | -6.08474873292006 | -1.17792748389422 |
| Si | 1.19446818414592  | -7.96711726744574 | -1.11607764087979 |
| Si | 1.19490598446528  | 8.02350920476885  | 1.26119297270716  |
| Si | -1.22148991359786 | 7.88033377347095  | 1.30243118735875  |
| Si | -2.41193246989069 | 5.82263036628595  | 1.30656022375206  |
| Si | -4.80351561666282 | 6.00613014720590  | 1.24578004975542  |

|    |                   |                   |                   |
|----|-------------------|-------------------|-------------------|
| Si | -6.00131181009449 | 3.94959439855262  | 1.13709067829283  |
| Si | -8.36251055830118 | 3.93297634802853  | 0.91881763636767  |
| Si | -9.52284581846560 | 1.82102710154411  | 0.79361762874074  |
| Si | 2.54941392023807  | 6.07590783995383  | 1.21970577632486  |
| Si | -1.11535463259042 | 3.82530794602307  | 1.35249680122849  |
| Si | -4.89951876938225 | 1.86973374814008  | 1.23554632782578  |
| Si | -8.34856411972686 | -0.23934818891460 | 0.86404065287523  |
| Si | 4.92713176656074  | 6.32334561118578  | 1.04526858049236  |
| Si | 1.30821108501131  | 4.04530551746827  | 1.30999986114229  |
| Si | -2.55491794255642 | 1.91966344304968  | 1.40495387288398  |
| Si | -6.00504379527460 | -0.21257137883303 | 1.12151416431528  |
| Si | -9.58086706585753 | -2.25652362240567 | 0.66656518019187  |
| Si | -8.29510366115097 | -4.28186892637627 | 0.69544846949454  |
| Si | -4.71772143871236 | -2.18441698840082 | 1.18202791552064  |
| Si | -1.72216990379808 | -0.26823082092633 | 1.58768967931900  |
| Si | 2.76557092841456  | 2.17046972784039  | 1.26666358626666  |
| Si | 6.13272629472943  | 4.26906339001398  | 0.94786104607678  |
| Si | 5.08263845986733  | 2.18126343862104  | 1.09856162472802  |
| Si | 1.67278916353705  | 0.15553949858941  | 1.58068989886005  |
| Si | -2.76626392353793 | -2.17399990358561 | 2.41312609341848  |
| Si | -5.95245575115174 | -4.15822517145023 | 0.98836958900930  |
| Si | 8.48931815384101  | 4.20861648834833  | 0.68881545428565  |
| Si | 9.64096806858453  | 2.08772872750091  | 0.66309479282453  |
| Si | 6.09949209333592  | 0.05363485049013  | 1.07688661307685  |
| Si | 2.51911236115373  | -2.00389132114667 | 1.39615036333479  |
| Si | -1.40264644629642 | -3.79660299161848 | 1.40401232762232  |
| Si | -4.78480632541565 | -6.21768308402549 | 1.06758187745392  |
| Si | 8.44489329500960  | 0.03761482851374  | 0.83793557750080  |
| Si | 4.87194339578513  | -1.97232875531525 | 1.23499810883279  |
| Si | 1.00168566357767  | -3.84779149130865 | 1.42706067632373  |
| Si | -2.42208859398630 | -5.92926942845607 | 1.22347513871552  |
| Si | 9.56018163792577  | -2.05787167249822 | 0.77126433995895  |
| Si | 5.93581100680788  | -4.06142630112564 | 1.13244588970209  |
| Si | 2.27654848382459  | -5.86857300809028 | 1.32192198415347  |
| Si | -1.22752319554010 | -7.96959198827196 | 1.24032055947712  |
| Si | 8.29581644625323  | -4.11353618689271 | 0.88883077981234  |
| Si | 4.66447144722929  | -6.07860078090830 | 1.24193698095295  |
| Si | 1.17717331177901  | -7.96816970737563 | 1.28915379087244  |
| H  | -1.76053868371500 | 8.99184371166150  | 2.15346141993095  |
| H  | -1.90998298606068 | 8.98043652396747  | -1.91411775410332 |
| H  | 5.23945378764236  | 7.37575905771680  | -2.26573212606212 |
| H  | 8.84600625220113  | 5.10717352006448  | -2.64182189359048 |
| H  | 8.61740552053671  | -5.17447081019062 | -2.40165657816189 |
| H  | 5.06060555138075  | -7.19190612194093 | -2.05394030959751 |

|   |                    |                   |                   |
|---|--------------------|-------------------|-------------------|
| H | 1.85868760745889   | -9.00480789130591 | -1.96891676947722 |
| H | -1.79386553709635  | -9.01247007902201 | -2.03019635965941 |
| H | -5.12063556623466  | -7.22622761656074 | -2.27329464897579 |
| H | -8.51680631840446  | -5.19764304826911 | -2.64673790511750 |
| H | -8.74910930676414  | 5.00360530211648  | -2.36546289775389 |
| H | -5.23316946812193  | 7.12734767682309  | -2.04646039702741 |
| H | -5.38791215818942  | 7.08791843471703  | 2.10344281340012  |
| H | -9.15687928612512  | 4.93172725867376  | 1.70575732402612  |
| H | -9.00810738764523  | -5.39340223363336 | 1.40562006262658  |
| H | -5.38991968686654  | -7.30767020459460 | 1.90249495370095  |
| H | -1.77825875340233  | -9.08884969572923 | 2.07322319443109  |
| H | 1.70523077855710   | -9.08018875311846 | 2.14621213987259  |
| H | 5.25293903762386   | -7.17181070789931 | 2.08241418979971  |
| H | 9.06571273876698   | -5.15190682672212 | 1.64838997486648  |
| H | 9.29535457720955   | 5.25657667265290  | 1.39452605873809  |
| H | 5.54805395852648   | 7.44045254543331  | 1.82744801213295  |
| H | 1.66176215627322   | 9.18749945436550  | -1.97792789500807 |
| H | 1.64474427573215   | 9.17799833021540  | 2.10611311905688  |
| C | 0.67740683542001   | 0.25516580084007  | 3.22869332155916  |
| O | 0.31053380332762   | 1.61300837787264  | 3.77696805952469  |
| O | -0.68966387529823  | -0.17796886942076 | 3.15512701183603  |
| H | 1.16965719564010   | -0.25995359990041 | 4.06898359154273  |
| H | 0.40001303546793   | 2.29904187450562  | 3.05115173155104  |
| H | 10.95754165056162  | 2.18688734430258  | 1.37323929332542  |
| H | 10.58375159752475  | 2.05505057274787  | -2.66977573646088 |
| H | 10.85781328889130  | -2.18299942758892 | 1.51131104169687  |
| H | 10.53436451943444  | -2.19966761259748 | -2.55967807253783 |
| H | -10.82604038714063 | 1.89928666986562  | 1.53139043083599  |
| H | -10.49164046882101 | 1.91105205058676  | -2.54052500514322 |
| H | -10.88083765771613 | -2.37578161492944 | 1.40337813464878  |
| H | -10.48980573599968 | -2.20437907468349 | -2.69159001404635 |
| H | -2.86597133631882  | -2.17691057599997 | 3.90583738924264  |
| H | -0.75863239967832  | 1.00758819641974  | 3.64545643388798  |

• TS 2Si-CHO → 2Si-OCH<sub>2</sub>

|    |                   |                  |                   |
|----|-------------------|------------------|-------------------|
| Si | 1.12549416418312  | 8.01586044847055 | -1.08201193958685 |
| Si | -1.26551896657251 | 8.03267922421274 | -1.11757694889921 |
| Si | -2.46465904755409 | 5.98572737050350 | -1.15940601488180 |
| Si | -4.82666538100374 | 6.15587026558263 | -1.33118937679095 |
| Si | -5.88652511692692 | 4.02579123105472 | -1.39820000559364 |
| Si | -8.24423382102509 | 3.90304440144014 | -1.65637220131761 |
| Si | -9.29079598546057 | 1.74354529149874 | -1.68162155487155 |
| Si | 2.30668690303586  | 5.96251781281236 | -1.08444819561799 |



|    |                   |                   |                   |
|----|-------------------|-------------------|-------------------|
| Si | -1.24060123668088 | 3.98385274202482  | -1.06737923639134 |
| Si | -4.73854846049022 | 1.94525315448777  | -1.26072436580571 |
| Si | -8.02697026148270 | -0.25090204212599 | -1.50399947574049 |
| Si | 4.66242228293460  | 6.16388142641594  | -1.17609832883894 |
| Si | 1.08943446376737  | 3.95110221726879  | -1.04029787959125 |
| Si | -2.38924961174055 | 1.95593922489696  | -1.08963589213951 |
| Si | -5.68632291172097 | -0.19847967398065 | -1.27609561379777 |
| Si | -9.24467693658442 | -2.27245040168239 | -1.57464159136224 |
| Si | -7.86089840746152 | -4.21418233644616 | -1.45284907751257 |
| Si | -4.17951312464795 | -2.02311437123413 | -1.11301775919664 |
| Si | -1.20247793556988 | -0.07123946111774 | -0.76039742368721 |
| Si | 2.27377352543675  | 1.94324745635749  | -1.06545106185641 |
| Si | 5.73440121367035  | 4.04886515046575  | -1.25249035153721 |
| Si | 4.61172097136386  | 1.96840505950328  | -1.15826864347715 |
| Si | 1.14139704603641  | -0.10594438702705 | -0.79928929619635 |
| Si | -2.07040769910247 | -1.78680063444464 | -2.16600168780993 |
| Si | -5.51164156290622 | -3.99509858800949 | -1.20101370106521 |
| Si | 8.09152420504475  | 4.07060568659698  | -1.48778660963540 |
| Si | 9.27199166310606  | 1.99329486636631  | -1.60736387536709 |
| Si | 5.73912195770115  | -0.07677084720445 | -1.28142883647066 |
| Si | 2.15899912978606  | -1.82832486834080 | -2.01025055745437 |
| Si | -1.15719670863498 | -3.61808682284237 | -1.00612975607528 |
| Si | -4.45509354265266 | -6.10349689292760 | -1.11179152157519 |
| Si | 8.07629313955972  | -0.05057711354813 | -1.52393522703860 |
| Si | 4.35297151034615  | -1.97919611765645 | -1.26708991102880 |
| Si | 1.18442617121459  | -3.71547053150989 | -1.14820140406072 |
| Si | -2.12300858044535 | -5.77326888589814 | -1.04983726273934 |
| Si | 9.33051555146615  | -2.04049154127129 | -1.70354019308460 |
| Si | 5.67103194382373  | -3.93285999897675 | -1.39775151577323 |
| Si | 2.24601536458328  | -5.80133900953261 | -1.19838271881763 |
| Si | -1.11503853697596 | -7.90736293736630 | -1.06511331825657 |
| Si | 8.02979409298473  | -4.04590402562490 | -1.66736483173202 |
| Si | 4.58750637022284  | -6.03514068202198 | -1.32128252087332 |
| Si | 1.25235124128910  | -7.94236146290955 | -1.10767371709009 |
| Si | 1.11057189834251  | 7.96632167733381  | 1.32091433222678  |
| Si | -1.31166520237987 | 7.98845689259705  | 1.28353658169299  |
| Si | -2.59059208394854 | 5.98851933828963  | 1.23937123423771  |
| Si | -4.97863460142869 | 6.19103390992422  | 1.08833008280280  |
| Si | -6.15331868413529 | 4.12283470184506  | 0.99073494226111  |
| Si | -8.50149010320472 | 3.99385010676166  | 0.72980380950221  |
| Si | -9.51789772460044 | 1.80969735377389  | 0.71352266267045  |
| Si | 2.36789029446031  | 5.94672597308937  | 1.31216408507533  |
| Si | -1.30213845220766 | 3.98751776525943  | 1.35292654644355  |
| Si | -5.05131498455008 | 2.06166556155651  | 1.12885441506414  |

|    |                   |                   |                   |
|----|-------------------|-------------------|-------------------|
| Si | -8.25227814862675 | -0.19672911260501 | 0.89068928655071  |
| Si | 4.75632739755071  | 6.14943804583915  | 1.24567256026237  |
| Si | 1.09695287838544  | 3.92897997862969  | 1.38701375102356  |
| Si | -2.74228784709833 | 2.12003165122725  | 1.26184160617701  |
| Si | -5.90551621051643 | -0.12237245421890 | 1.12336467745255  |
| Si | -9.43364557710527 | -2.24424626389844 | 0.81928348605812  |
| Si | -8.08343860123585 | -4.22612815596149 | 0.94158273851909  |
| Si | -4.51131797173005 | -2.04127585751302 | 1.29327091451859  |
| Si | -1.72822263628389 | 0.07081063938277  | 1.60907360638180  |
| Si | 2.53233403184443  | 2.03221145858901  | 1.30373288198042  |
| Si | 5.95277403760641  | 4.08666978280516  | 1.14491042798043  |
| Si | 4.87193390461647  | 2.00121881957274  | 1.23531766916250  |
| Si | 1.75376626454796  | -0.17353128411293 | 1.55774542728293  |
| Si | -2.46663355024414 | -1.98602578613972 | 2.41735112502879  |
| Si | -5.73447540867392 | -4.03822879233797 | 1.18502707238370  |
| Si | 8.31132424950087  | 4.07278875535752  | 0.90627390228237  |
| Si | 9.47521177305599  | 1.96465331684455  | 0.78971336079816  |
| Si | 5.95345067613196  | -0.08831914290419 | 1.11417238730646  |
| Si | 2.71253724259075  | -2.09117774745323 | 2.43168069812287  |
| Si | -1.09679832566656 | -3.64403967222579 | 1.43329102345107  |
| Si | -4.52513166506933 | -6.06840262228503 | 1.30207699403136  |
| Si | 8.30236794788801  | -0.09954678827001 | 0.86846960105801  |
| Si | 4.68082690105121  | -2.07395703153546 | 1.23645908385734  |
| Si | 1.29023676509261  | -3.63615520576814 | 1.35660131615753  |
| Si | -2.15841732281035 | -5.77280199962089 | 1.34207947460303  |
| Si | 9.54582970997693  | -2.11106401843024 | 0.68921061129603  |
| Si | 5.93469819081343  | -4.01946632372546 | 0.99150951182798  |
| Si | 2.33329954687452  | -5.75966165652439 | 1.21076821520196  |
| Si | -1.09160586140693 | -7.88285430311235 | 1.34091049598903  |
| Si | 8.27965548317394  | -4.14897733458727 | 0.71911120263857  |
| Si | 4.70253135177093  | -6.03474154603412 | 1.08273843026458  |
| Si | 1.29675589953087  | -7.88038638509531 | 1.29216791349925  |
| H  | -1.80801763212026 | 9.12482545813397  | 2.12721859399616  |
| H  | -1.83537320581040 | 9.14274851788654  | -1.94758074514289 |
| H  | 5.21486747735967  | 7.24810666884875  | -2.04976859186826 |
| H  | 8.67050448375310  | 5.11699085058916  | -2.39034511334553 |
| H  | 8.53115119102651  | -5.09506374102630 | -2.61271814549724 |
| H  | 5.09248090916869  | -7.10473655826296 | -2.24087493893033 |
| H  | 1.89842902816478  | -8.98963724895090 | -1.96185913831261 |
| H  | -1.79209595659655 | -8.93863850824679 | -1.91507134646374 |
| H  | -4.95423352125449 | -7.21039078677026 | -1.99129813285356 |
| H  | -8.32087843270613 | -5.32898948677059 | -2.34332248229989 |
| H  | -8.89235315341554 | 4.85534148029139  | -2.61490338874886 |
| H  | -5.34431280919173 | 7.24243628390886  | -2.22387252260270 |

|   |                    |                   |                   |
|---|--------------------|-------------------|-------------------|
| H | -5.61157683299510  | 7.29425890107176  | 1.88160669958860  |
| H | -9.35344825708318  | 4.99643353848759  | 1.44691491130357  |
| H | -8.75984010863611  | -5.31392811841065 | 1.72127292557141  |
| H | -5.06442627711563  | -7.13788270363020 | 2.20585238395496  |
| H | -1.64705497868933  | -8.96125345883532 | 2.22232952195446  |
| H | 1.92542090465512   | -8.91707101243779 | 2.17333948112927  |
| H | 5.25744788136374   | -7.12169277216436 | 1.95294163710921  |
| H | 8.97740906299877   | -5.25737754473344 | 1.44698290772415  |
| H | 9.11240343051334   | 5.08112833449009  | 1.67292515929006  |
| H | 5.36559751299057   | 7.22868500290839  | 2.08871841212871  |
| H | 1.73994977896182   | 9.11483391725879  | -1.89482768384357 |
| H | 1.60322905347920   | 9.09380464846732  | 2.17899863276243  |
| C | 0.57639667000660   | 0.18138239381608  | 3.04293630558135  |
| O | -0.66045816806659  | 0.61613371354785  | 2.92426580733515  |
| H | 1.09778334958716   | 0.62039087118124  | 3.91857409542976  |
| H | 10.78279284575897  | 2.03923785682595  | 1.51944237242212  |
| H | 10.43987307355948  | 2.04877874057141  | -2.54483081206504 |
| H | 10.84012150917833  | -2.22439442676159 | 1.43577645507725  |
| H | 10.47389769093834  | -2.07472081382610 | -2.67056498298839 |
| H | -10.83875858748718 | 1.83643088060402  | 1.42312792254278  |
| H | -10.46067447136502 | 1.71324236394634  | -2.61887550304724 |
| H | -10.71272396036656 | -2.36411264099358 | 1.59124476857704  |
| H | -10.39252456578052 | -2.38216052770757 | -2.53106939528804 |
| H | -2.52790867351472  | -2.04606038899615 | 3.91072758945107  |
| H | 1.33804373687353   | -1.83320953224040 | 3.80101483907789  |
| H | 0.64091644405715   | -1.21498779264974 | 3.70545475680369  |

• TS 2Si-OCH<sub>2</sub> → 2Si-OCH<sub>2</sub>\*

|    |                   |                   |                   |
|----|-------------------|-------------------|-------------------|
| Si | 1.09678722827970  | 8.01052346548178  | -1.08708953289549 |
| Si | -1.29131737299679 | 8.01650632919510  | -1.08766733582612 |
| Si | -2.46316712465956 | 5.95666307877028  | -1.09675660267207 |
| Si | -4.81985118944964 | 6.14477994126062  | -1.25976828983877 |
| Si | -5.86944190104485 | 4.01691540094703  | -1.35464098294565 |
| Si | -8.22552170127945 | 3.91523775150693  | -1.62933598812807 |
| Si | -9.32346938250848 | 1.78564463265842  | -1.70967515455605 |
| Si | 2.29576799340889  | 5.96580077671525  | -1.10123510684680 |
| Si | -1.21543996848324 | 3.96617818818051  | -1.00530525366606 |
| Si | -4.71133871947398 | 1.94998679067087  | -1.21459724536757 |
| Si | -8.07543067092254 | -0.22332488434597 | -1.57745260663655 |
| Si | 4.64714480798362  | 6.20019543660739  | -1.25982798436615 |
| Si | 1.11123915926898  | 3.941111188781781 | -1.01320096182951 |
| Si | -2.37225710183530 | 1.94746822964029  | -1.01813571409330 |
| Si | -5.74182934243180 | -0.14835392540257 | -1.32353321627899 |

|    |                   |                   |                   |
|----|-------------------|-------------------|-------------------|
| Si | -9.26336415357593 | -2.25847020761287 | -1.71105305475676 |
| Si | -7.92741405372087 | -4.24043802376507 | -1.62816806268718 |
| Si | -4.36561738061016 | -2.06041230551061 | -1.23529862634910 |
| Si | -1.13007769664522 | -0.01566508532971 | -0.59230074126620 |
| Si | 2.32264604736506  | 1.96060910950447  | -0.95112248968237 |
| Si | 5.75145692156130  | 4.10064055762149  | -1.34597898646452 |
| Si | 4.65619859211228  | 2.00125929879433  | -1.19681632693193 |
| Si | 1.20202257674259  | -0.08963227231625 | -0.58940805298939 |
| Si | -2.09308317035856 | -1.83589707935614 | -1.69305126762696 |
| Si | -5.57270760149710 | -4.09343284214539 | -1.36609726460563 |
| Si | 8.10393617900511  | 4.07442224441319  | -1.65065114965119 |
| Si | 9.24861109431866  | 1.97114562815473  | -1.74255601009706 |
| Si | 5.71708453120754  | -0.07880147656054 | -1.29683671030303 |
| Si | 2.09343012448868  | -1.73735650191459 | -2.05390699916403 |
| Si | -1.05209611871256 | -3.77246494662431 | -1.03578994159015 |
| Si | -4.44104680086873 | -6.16420510667576 | -1.24729824422825 |
| Si | 8.04812126374755  | -0.06526357859441 | -1.59068068559233 |
| Si | 4.28055985094972  | -1.95631421165877 | -1.16613720162399 |
| Si | 1.28150983583542  | -3.64653356727148 | -0.97851267287367 |
| Si | -2.10967428409671 | -5.86021797286829 | -1.13042408246987 |
| Si | 9.30485677072485  | -2.05702365383003 | -1.74674889063623 |
| Si | 5.63497793991514  | -3.91014044758203 | -1.32800017218741 |
| Si | 2.28417308257463  | -5.77761302238322 | -1.09266094946153 |
| Si | -1.06755865883413 | -7.97799892702153 | -1.07200944271480 |
| Si | 7.98568504619543  | -4.04593750501090 | -1.64874874089114 |
| Si | 4.62057471394053  | -6.04189502609934 | -1.22247965709873 |
| Si | 1.29867505079716  | -7.92424981133909 | -1.07414425062111 |
| Si | 1.11582507817384  | 7.96577981994864  | 1.31467634821651  |
| Si | -1.31047772495384 | 7.97613580513801  | 1.31447352377559  |
| Si | -2.57576414483020 | 5.96486995995681  | 1.29823710654619  |
| Si | -4.96571573836797 | 6.15258434559039  | 1.16002492311894  |
| Si | -6.14226679445914 | 4.08010696210197  | 1.04051225975232  |
| Si | -8.49141097684320 | 3.96616894408514  | 0.75754965755716  |
| Si | -9.54865597054113 | 1.79967189783731  | 0.68648504350576  |
| Si | 2.40585980897787  | 5.96698130837650  | 1.29254354814729  |
| Si | -1.26245491325510 | 3.97205089563394  | 1.41813200669792  |
| Si | -5.02895552413053 | 2.02010485489749  | 1.16666691778383  |
| Si | -8.30680482725976 | -0.22675561129787 | 0.81497429680667  |
| Si | 4.79545455802371  | 6.21110968755223  | 1.16045032740741  |
| Si | 1.15648992048040  | 3.93366817238080  | 1.41708826711326  |
| Si | -2.70654724418521 | 2.09413028320169  | 1.33541838287547  |
| Si | -5.96038103870837 | -0.14191161237295 | 1.06819904071180  |
| Si | -9.47820620965423 | -2.28145787349871 | 0.68266610945005  |
| Si | -8.16115032944273 | -4.29071372843418 | 0.76259388880325  |

|    |                   |                   |                   |
|----|-------------------|-------------------|-------------------|
| Si | -4.64476571365419 | -2.11630129789755 | 1.18789821276210  |
| Si | -1.74077785808865 | 0.02772715825678  | 1.79382779457331  |
| Si | 2.65953826895977  | 2.09287390958308  | 1.41006337992645  |
| Si | 6.03688863430823  | 4.17773905603732  | 1.03806118945839  |
| Si | 4.97644506285634  | 2.09096057348758  | 1.18883594114424  |
| Si | 1.70329859317128  | 0.00569759443881  | 1.80862626981104  |
| Si | -2.61200301298648 | -2.06614825261217 | 2.30492527035395  |
| Si | -5.81149451534065 | -4.13571628332137 | 1.02081469169109  |
| Si | 8.38639676234183  | 4.13030521088538  | 0.73522668280082  |
| Si | 9.50447961740505  | 1.99324640072272  | 0.65053799052120  |
| Si | 5.98065916713321  | -0.03711847318847 | 1.09466719995459  |
| Si | 2.69317267771101  | -2.01225181974564 | 2.39787353069761  |
| Si | -1.11766274321987 | -3.69102240472923 | 1.43887977863422  |
| Si | -4.54628432852807 | -6.13086289582132 | 1.16299050452277  |
| Si | 8.32269800876798  | -0.06500547012511 | 0.79950298105187  |
| Si | 4.68759764434078  | -2.01620770999843 | 1.22759628220875  |
| Si | 1.28252781912350  | -3.66705904332589 | 1.46539207486762  |
| Si | -2.17663353027437 | -5.81765899097952 | 1.27007713180323  |
| Si | 9.55754648564635  | -2.08180089828131 | 0.64227875680826  |
| Si | 5.93325930611863  | -3.98267896969118 | 1.04954428352636  |
| Si | 2.37225995127679  | -5.78038324654786 | 1.29802642281692  |
| Si | -1.07656048128688 | -7.91197671744256 | 1.32971120318485  |
| Si | 8.27701954975088  | -4.11106295960826 | 0.73652909120041  |
| Si | 4.74868717679465  | -6.02570403560113 | 1.19210077263936  |
| Si | 1.31598009105761  | -7.89317692262791 | 1.33136274156698  |
| H  | -1.79418316000546 | 9.11601442775955  | 2.16140012050852  |
| H  | -1.89533941845498 | 9.10826427165860  | -1.91792061667111 |
| H  | 5.14016604993487  | 7.30006751468307  | -2.14993676469523 |
| H  | 8.68512488988474  | 5.08223376703907  | -2.59547059120839 |
| H  | 8.46166271650536  | -5.11707295111378 | -2.58341552451384 |
| H  | 5.11439258660702  | -7.13468315354146 | -2.12235625212308 |
| H  | 1.97084841186611  | -8.95071115008774 | -1.93332428997208 |
| H  | -1.72314960378128 | -9.03024393220052 | -1.91264264014345 |
| H  | -4.89937884587878 | -7.27568252590288 | -2.14125128056817 |
| H  | -8.41589425172413 | -5.31959381008368 | -2.54619583193848 |
| H  | -8.84414778433536 | 4.90328000434491  | -2.57056993152403 |
| H  | -5.34492808328601 | 7.23509333340457  | -2.14282271799024 |
| H  | -5.61861380354219 | 7.23652078918089  | 1.96332612621510  |
| H  | -9.35097670169955 | 4.95683045444688  | 1.48224153124336  |
| H  | -8.84611573360982 | -5.38903417868134 | 1.51789925321157  |
| H  | -5.09096276198389 | -7.21352093851357 | 2.04539005454766  |
| H  | -1.65968733525400 | -8.96913641891071 | 2.21832980685940  |
| H  | 1.88521689746042  | -8.96874038562080 | 2.20714687144067  |
| H  | 5.32981117490998  | -7.09465670144838 | 2.07031310822262  |

|   |                    |                   |                   |
|---|--------------------|-------------------|-------------------|
| H | 9.00023966592815   | -5.20279339903460 | 1.46676597510779  |
| H | 9.22646328630322   | 5.14129557984699  | 1.45581605703704  |
| H | 5.39735642929860   | 7.31748078094562  | 1.97375582520675  |
| H | 1.69657286374641   | 9.10993551597773  | -1.91044235164023 |
| H | 1.59930322461507   | 9.10603572671935  | 2.16161319869794  |
| C | 0.57460639520505   | 0.31504486841023  | 3.37103081975711  |
| O | -0.81694390473114  | 0.29042490497935  | 3.17776109873098  |
| H | 0.86861615923369   | 1.30850173963747  | 3.76711721795496  |
| H | 10.83116062852363  | 2.07032903101757  | 1.34572391673414  |
| H | 10.40235913049160  | 2.00063737487193  | -2.69935582227874 |
| H | 10.86162039350064  | -2.18967163442933 | 1.37331771759901  |
| H | 10.43466831028717  | -2.11350453317223 | -2.72897961532376 |
| H | -10.86853751894753 | 1.82955295223146  | 1.39723122082382  |
| H | -10.48892927466171 | 1.79163516354193  | -2.65225383207469 |
| H | -10.76978353688912 | -2.42512189830057 | 1.42888561726430  |
| H | -10.40575512162028 | -2.34762080329762 | -2.67584297488482 |
| H | -2.77378638276864  | -2.23579252372551 | 3.78165590543738  |
| H | 2.81580761346453   | -2.16229008176337 | 3.88314894320683  |
| H | 0.84146341658120   | -0.43921917055467 | 4.13786447545923  |

• TS 2Si-OCH<sub>2</sub>\* → 2Si-OHCH<sub>2</sub>\*

|    |                   |                   |                   |
|----|-------------------|-------------------|-------------------|
| Si | 1.34027404021231  | 8.04361079075655  | -1.15307937155364 |
| Si | -1.05034663589058 | 8.00562831649003  | -1.11326020594547 |
| Si | -2.24085036598131 | 5.95687108314157  | -1.08599195772180 |
| Si | -4.59299571929929 | 6.20328539792868  | -1.17978613107034 |
| Si | -5.68293367857803 | 4.10061264176066  | -1.25579703530564 |
| Si | -8.04291482096433 | 4.14068956512198  | -1.45009139203885 |
| Si | -9.23983333523988 | 2.07239920494415  | -1.56453601657634 |
| Si | 2.53666112684064  | 5.99578184748051  | -1.16618542605187 |
| Si | -1.05267649323067 | 3.92669403437981  | -1.04574710737105 |
| Si | -4.58573587699568 | 2.00541777567912  | -1.16717663603042 |
| Si | -8.06294830893685 | 0.01618559918534  | -1.49200637653905 |
| Si | 4.90151503608975  | 6.12909891690251  | -1.33965722135126 |
| Si | 1.27427387458007  | 4.01514312819124  | -1.06005924584531 |
| Si | -2.25348427841296 | 1.92419940638456  | -0.99899755522667 |
| Si | -5.72230049471704 | -0.03487375526845 | -1.27596642882966 |
| Si | -9.34850601865741 | -1.95300323557231 | -1.67627271185043 |
| Si | -8.08637326046872 | -3.98438997257868 | -1.65783537404614 |
| Si | -4.37409968820854 | -1.96975417682623 | -1.24660096409162 |
| Si | -1.16915011366729 | -0.15907750179696 | -0.87366750092510 |
| Si | 2.38049977779905  | 1.96621287290531  | -1.02024128668118 |
| Si | 5.91363482011731  | 3.97886156338095  | -1.38591848960387 |
| Si | 4.72643421211130  | 1.92323510760342  | -1.22798603868505 |

|    |                   |                   |                   |
|----|-------------------|-------------------|-------------------|
| Si | 1.15853982766269  | -0.04225503323315 | -0.68854956444610 |
| Si | -2.19581208530117 | -1.87698264268915 | -2.08623853005942 |
| Si | -5.72259134641009 | -3.90771371744649 | -1.41265024582271 |
| Si | 8.27058085437073  | 3.84303748541340  | -1.63978489256791 |
| Si | 9.31259809141383  | 1.68310385733289  | -1.65647206930704 |
| Si | 5.68917171383640  | -0.21420817359362 | -1.24681090528780 |
| Si | 2.05953748581639  | -1.77688854513184 | -2.03487933564669 |
| Si | -1.24593200173032 | -3.75120862531888 | -1.16105952216728 |
| Si | -4.66637884964578 | -6.02651059903619 | -1.33817364065930 |
| Si | 8.02787545774881  | -0.29665021258810 | -1.47865133970465 |
| Si | 4.20584116965165  | -2.05134900801292 | -1.09791688801369 |
| Si | 1.08890905093974  | -3.66525027539196 | -1.04330540917167 |
| Si | -2.31608521884795 | -5.83477022717477 | -1.23181298090267 |
| Si | 9.23140462784642  | -2.32664123718554 | -1.54823186647027 |
| Si | 5.49577576840000  | -4.04203322045741 | -1.20391430567894 |
| Si | 2.08672537224626  | -5.79990663192961 | -1.09982320325996 |
| Si | -1.30676749158118 | -7.96897043689421 | -1.15067541826102 |
| Si | 7.84616951977624  | -4.26641571884138 | -1.43651194911818 |
| Si | 4.41679280971100  | -6.13784212537603 | -1.12728414108414 |
| Si | 1.06242722204024  | -7.92600847725912 | -1.10175587062659 |
| Si | 1.39025179317332  | 8.03213914095307  | 1.24818114452138  |
| Si | -1.03066664121162 | 7.99016975273334  | 1.29041383393645  |
| Si | -2.29352170811855 | 5.97304484520485  | 1.31055652037006  |
| Si | -4.67786775232282 | 6.19014386147530  | 1.24283611209155  |
| Si | -5.85762284809887 | 4.12057030697150  | 1.14082835094221  |
| Si | -8.22192361941902 | 4.12850259996094  | 0.94780200193846  |
| Si | -9.42169538070162 | 2.04069617899424  | 0.83414833822555  |
| Si | 2.66277327183805  | 6.02835047360600  | 1.23025647106360  |
| Si | -1.04598934188617 | 3.94194910902696  | 1.37963092354334  |
| Si | -4.78235216611055 | 2.02509922799966  | 1.22268781988902  |
| Si | -8.27742216206177 | -0.03744176807973 | 0.90062071040139  |
| Si | 5.05279908772956  | 6.18060981550828  | 1.08007189529806  |
| Si | 1.34905430822298  | 4.04800175610526  | 1.35735230454213  |
| Si | -2.43471761122946 | 2.00404776867465  | 1.39396946092194  |
| Si | -5.92822255292025 | -0.03565611964528 | 1.12360890709520  |
| Si | -9.55211849195848 | -2.03041261032580 | 0.71813265029591  |
| Si | -8.32747638171303 | -4.09252942293211 | 0.73034198095427  |
| Si | -4.71467295634742 | -2.04734667840976 | 1.23079129764351  |
| Si | -1.79617942125690 | -0.25552127207319 | 1.45322779435756  |
| Si | 2.72459454029507  | 2.13405980959358  | 1.32996273508119  |
| Si | 6.17591418755107  | 4.08372961676634  | 1.00599337189796  |
| Si | 5.03182328256310  | 2.04245975979865  | 1.15863939567568  |
| Si | 1.65024904523274  | 0.11231639292471  | 1.71098555690605  |
| Si | -2.78292076165782 | -2.15343330125435 | 2.46715234143850  |

|    |                   |                   |                   |
|----|-------------------|-------------------|-------------------|
| Si | -5.97612691554713 | -3.99387125693304 | 0.96874971312311  |
| Si | 8.52295614281637  | 3.93912427350118  | 0.74714839133722  |
| Si | 9.53108597547892  | 1.75147232580406  | 0.73872983877876  |
| Si | 5.89783780019971  | -0.14372443625844 | 1.15014357845360  |
| Si | 2.43299953462387  | -1.98951955570174 | 2.36402249814165  |
| Si | -1.35085514429379 | -3.67129878520384 | 1.37002045230398  |
| Si | -4.76978538566388 | -6.02600870758825 | 1.06912987766737  |
| Si | 8.24586086111242  | -0.24261312122134 | 0.91576934601484  |
| Si | 4.50813031655001  | -2.06740807340300 | 1.31165940753487  |
| Si | 1.03448420013119  | -3.64965600054392 | 1.40767516874318  |
| Si | -2.39276370833974 | -5.79229964170744 | 1.16609236693569  |
| Si | 9.40917447246806  | -2.30116657489664 | 0.84765297818630  |
| Si | 5.69970078760639  | -4.08207205658978 | 1.18316852133250  |
| Si | 2.09934227764433  | -5.77697060122702 | 1.29308380084217  |
| Si | -1.35445239305637 | -7.91194885321591 | 1.25050484021130  |
| Si | 8.05065304406130  | -4.27905495834146 | 0.95870853008509  |
| Si | 4.46452455319424  | -6.09674614162373 | 1.28694093619249  |
| Si | 1.03262877946201  | -7.89074958883058 | 1.30309166518734  |
| H  | -1.53143462986043 | 9.12928930439116  | 2.12837152957528  |
| H  | -1.67141775386358 | 9.09474495468820  | -1.93454814258049 |
| H  | 5.44592527208980  | 7.19439001821147  | -2.24186314849341 |
| H  | 8.92016977599627  | 4.79368113617425  | -2.59893952328525 |
| H  | 8.30621039776418  | -5.38135488343349 | -2.32648047861134 |
| H  | 4.92230104784323  | -7.24605902208635 | -2.00105036467210 |
| H  | 1.74222348630136  | -8.96413704528008 | -1.94131016779268 |
| H  | -1.93340117158655 | -9.02384564774042 | -2.00992271553023 |
| H  | -5.19168573666635 | -7.09218849125405 | -2.25154437564717 |
| H  | -8.62075869670873 | -5.01669400665900 | -2.60378851619263 |
| H  | -8.63284387028292 | 5.19596957021922  | -2.33537947914088 |
| H  | -5.11567931319454 | 7.30055348163812  | -2.05582452866805 |
| H  | -5.27975683485415 | 7.26681334532868  | 2.09449096719768  |
| H  | -8.99659071560753 | 5.14094314227811  | 1.73646993572536  |
| H  | -9.04122923083495 | -5.18985678413101 | 1.45993542101228  |
| H  | -5.33568036493552 | -7.10379028765444 | 1.94463056004316  |
| H  | -1.97161266901639 | -8.95246262611724 | 2.13528088449170  |
| H  | 1.60400775784899  | -8.95590303860395 | 2.19043276190381  |
| H  | 4.96898265372684  | -7.17574895168167 | 2.19943442646852  |
| H  | 8.71833526141779  | -5.36851344804666 | 1.74340639810486  |
| H  | 9.37986663874073  | 4.93917493721988  | 1.46211896072365  |
| H  | 5.71297302621788  | 7.27486260746821  | 1.86331724939413  |
| H  | 1.89961246028050  | 9.14294447818020  | -2.00406489234043 |
| H  | 1.88410784639380  | 9.17808205206930  | 2.08008601802446  |
| C  | 0.39155598679864  | 0.48353927204145  | 3.11372326351420  |
| O  | -0.65968333322366 | -0.48718410381243 | 2.85120244001933  |



|   |                    |                   |                   |
|---|--------------------|-------------------|-------------------|
| H | -0.03533015557132  | 1.50505105942426  | 3.12676489459455  |
| H | 10.84735556481970  | 1.77381208986976  | 1.45687287585489  |
| H | 10.48222124657602  | 1.64174877946031  | -2.59340880353858 |
| H | 10.68470942250361  | -2.43638513708720 | 1.62307753292578  |
| H | 10.38428218162688  | -2.43802092709973 | -2.49831587424206 |
| H | -10.72081887690749 | 2.13539870373118  | 1.57665977626888  |
| H | -10.41393342449282 | 2.13743451930332  | -2.49374767369092 |
| H | -10.84515602046321 | -2.11982581742100 | 1.47041174799411  |
| H | -10.50025721727997 | -1.96457703759751 | -2.63420306486790 |
| H | -1.59098964808373  | -1.15232479675362 | 3.46369790758938  |
| H | 2.46896230882627   | -2.10211463719589 | 3.85803993229840  |
| H | 0.83310163317618   | 0.25175770298275  | 4.09801198706404  |

• TS 2Si-OHCH<sub>2</sub>\* → 2Si-OHCH<sub>2</sub>

|    |                   |                   |                   |
|----|-------------------|-------------------|-------------------|
| Si | 1.35778571963471  | 8.03964252834319  | -1.17470337599684 |
| Si | -1.03590386699681 | 8.00905167278954  | -1.12359432459613 |
| Si | -2.23688980934115 | 5.96671549869117  | -1.09090590908260 |
| Si | -4.58997788323924 | 6.21885688264669  | -1.13226753740941 |
| Si | -5.67033401646715 | 4.11014152977902  | -1.19187877284826 |
| Si | -8.03457066817015 | 4.16556830266486  | -1.32927655091450 |
| Si | -9.24603418640070 | 2.10524096252534  | -1.43111250313998 |
| Si | 2.54930415923129  | 5.98824956202567  | -1.20382776345419 |
| Si | -1.05929338323761 | 3.92492494300751  | -1.06996978771636 |
| Si | -4.57350487450912 | 2.01774877649937  | -1.14064873368309 |
| Si | -8.06393881145139 | 0.05117905220960  | -1.42820627238118 |
| Si | 4.91721133599374  | 6.11025322722271  | -1.35366529156580 |
| Si | 1.27539531959566  | 4.00993487079520  | -1.11835322738410 |
| Si | -2.24067304305249 | 1.90129649821361  | -1.02727788417368 |
| Si | -5.71719464879810 | -0.01495226240921 | -1.30462303869651 |
| Si | -9.35756957968430 | -1.91613989332453 | -1.57953406327571 |
| Si | -8.11058814572654 | -3.95916719433697 | -1.59514512737461 |
| Si | -4.39088834681742 | -1.95847874508529 | -1.38854181733249 |
| Si | -1.20595853250920 | -0.19624862951630 | -0.95843968226010 |
| Si | 2.35969847534734  | 1.94348868077719  | -1.15110607115747 |
| Si | 5.91452554145129  | 3.95071978643206  | -1.38742468654393 |
| Si | 4.71558992007265  | 1.90106660174849  | -1.25856965043584 |
| Si | 1.11906095134622  | -0.04893642032020 | -0.83024037555672 |
| Si | -2.21283605164616 | -1.88578214852439 | -2.17796492210698 |
| Si | -5.74020249638882 | -3.89801011555233 | -1.45509273223454 |
| Si | 8.27768598807751  | 3.81852956703100  | -1.58084865079191 |
| Si | 9.32371107218772  | 1.65931389469653  | -1.57920531776707 |
| Si | 5.69047723271616  | -0.23349026273795 | -1.25350132685087 |
| Si | 2.05758578121846  | -1.80922091879330 | -2.06128993490607 |

|    |                   |                   |                   |
|----|-------------------|-------------------|-------------------|
| Si | -1.27503529710747 | -3.73541645496164 | -1.18820650093242 |
| Si | -4.68596478639516 | -6.01786899362924 | -1.37525251565900 |
| Si | 8.03524851785246  | -0.32016530328778 | -1.42761652924214 |
| Si | 4.19782903754745  | -2.06072413873110 | -1.12223494137158 |
| Si | 1.06795512872929  | -3.68398527747574 | -1.05854902494000 |
| Si | -2.33363181225102 | -5.82473234901391 | -1.24731956223227 |
| Si | 9.23454125187184  | -2.35429221958029 | -1.46334093947073 |
| Si | 5.48176684359779  | -4.05208571178633 | -1.18426925456959 |
| Si | 2.07363379661632  | -5.82138011154431 | -1.10722282198959 |
| Si | -1.33039127228818 | -7.96528523380162 | -1.19086002369860 |
| Si | 7.83505497531495  | -4.28475949743700 | -1.36487930791217 |
| Si | 4.40741792131784  | -6.15031214244383 | -1.13378873800734 |
| Si | 1.04099950210322  | -7.94239460601742 | -1.13959428345572 |
| Si | 1.41309387982977  | 8.02477293396609  | 1.22600786912525  |
| Si | -1.00224410530973 | 7.99750099814857  | 1.28020124486063  |
| Si | -2.25160679772352 | 5.97422862610263  | 1.31140322797842  |
| Si | -4.63011728863027 | 6.18711653675054  | 1.29072391180217  |
| Si | -5.78859671173188 | 4.10560769002319  | 1.20966786939589  |
| Si | -8.15563698478920 | 4.13733670542837  | 1.07188377371505  |
| Si | -9.34411476028677 | 2.04717438862669  | 0.97180434199294  |
| Si | 2.66024464104150  | 6.00724828807001  | 1.19597077507186  |
| Si | -1.03332160576642 | 3.93071318608067  | 1.34534673153113  |
| Si | -4.71590642675344 | 2.00341303362605  | 1.25069745393818  |
| Si | -8.18854876530570 | -0.02499501363734 | 0.96986216473834  |
| Si | 5.04428876107450  | 6.15596966184048  | 1.06825261333707  |
| Si | 1.35414983296964  | 4.02505193580091  | 1.29287714592273  |
| Si | -2.36137453347075 | 1.94898073333336  | 1.36190185008036  |
| Si | -5.83352487449432 | -0.06759521385755 | 1.10519410830887  |
| Si | -9.49603609804838 | -1.99520799397913 | 0.81925548503706  |
| Si | -8.25500677776115 | -4.04225450190254 | 0.80175570260137  |
| Si | -4.55207112216110 | -2.03955005784899 | 1.12315149858492  |
| Si | -1.63410727603367 | -0.28117788420709 | 1.53557689850843  |
| Si | 2.65116751660347  | 2.06283148252497  | 1.20790644355181  |
| Si | 6.12077233556548  | 4.03785340842015  | 1.00924437078679  |
| Si | 4.96267484624889  | 2.00197848620180  | 1.13146372711778  |
| Si | 1.47231584478333  | 0.09705998858188  | 1.63674022748818  |
| Si | -2.68430826698984 | -2.13154490206712 | 2.45303762288672  |
| Si | -5.89575018271003 | -3.94336916249759 | 0.93944853732518  |
| Si | 8.47379580507487  | 3.90361735288327  | 0.81325696851898  |
| Si | 9.49499600623909  | 1.72583382849918  | 0.81964997130424  |
| Si | 5.84860931067954  | -0.17119343891257 | 1.14696353522547  |
| Si | 2.31994961261673  | -1.97617783657088 | 2.31848931057066  |
| Si | -1.36565509411616 | -3.70516642779278 | 1.34711158039651  |
| Si | -4.78154207198821 | -6.02459313923415 | 1.03100839046117  |

|    |                    |                   |                   |
|----|--------------------|-------------------|-------------------|
| Si | 8.20061217409070   | -0.26260324313414 | 0.97094998244850  |
| Si | 4.42192114716326   | -2.06765450371211 | 1.29364222614050  |
| Si | 1.01589218343361   | -3.70310743499279 | 1.37227518621500  |
| Si | -2.41172984215905  | -5.82162997209602 | 1.15154698531285  |
| Si | 9.36506411221843   | -2.31952305301502 | 0.93558006649037  |
| Si | 5.63403671921621   | -4.08003906332711 | 1.20994478195307  |
| Si | 2.08655075320861   | -5.82554099211624 | 1.28300828861099  |
| Si | -1.37902015502750  | -7.94227449667729 | 1.21040105207093  |
| Si | 7.98978894874434   | -4.28361595948781 | 1.03420606234445  |
| Si | 4.44652831451755   | -6.12616248857323 | 1.28163267925055  |
| Si | 1.00803391173919   | -7.93321801195974 | 1.26670479855822  |
| H  | -1.50562752227205  | 9.13307018875535  | 2.12112404924988  |
| H  | -1.64721939013385  | 9.10577412317802  | -1.94209094965527 |
| H  | 5.48080792157209   | 7.16925650166622  | -2.25156442039015 |
| H  | 8.95550694164371   | 4.77102066418167  | -2.51866332687173 |
| H  | 8.30881487676409   | -5.40819753580738 | -2.23688645486852 |
| H  | 4.92782008522381   | -7.24305861950625 | -2.01858807288199 |
| H  | 1.70869276309669   | -8.97868796662446 | -1.99145200818789 |
| H  | -1.95964466546361  | -9.00967074425987 | -2.06141446639720 |
| H  | -5.19570914218756  | -7.08104147407941 | -2.30077525788027 |
| H  | -8.70216918485638  | -4.98848541256293 | -2.51041656448465 |
| H  | -8.63410380789114  | 5.23310697844058  | -2.19321364373267 |
| H  | -5.13499486411324  | 7.31708484279120  | -1.99336946341206 |
| H  | -5.21653344396914  | 7.25628031562092  | 2.16245911913215  |
| H  | -8.90756757960219  | 5.14379698301998  | 1.88973817121843  |
| H  | -8.91829560135237  | -5.14450086344171 | 1.57052946122720  |
| H  | -5.40011419707940  | -7.07303720493219 | 1.90601496015459  |
| H  | -2.00292578937177  | -8.99507805886505 | 2.07568651980722  |
| H  | 1.57603483392954   | -9.01141053400303 | 2.14049677605224  |
| H  | 4.97723706747724   | -7.19948065088321 | 2.18568497763204  |
| H  | 8.63407022446440   | -5.37468296406404 | 1.83622261022340  |
| H  | 9.30042612057821   | 4.91097135881659  | 1.55329093141203  |
| H  | 5.70709323453776   | 7.23790617067917  | 1.86609577079689  |
| H  | 1.90351782247719   | 9.14492004098327  | -2.02691925322845 |
| H  | 1.93263926994714   | 9.15535055192959  | 2.06276834158096  |
| C  | 0.52060774877283   | 0.70313949915794  | 3.21214640784662  |
| O  | -0.62371772012584  | -0.19876757730661 | 3.32775989727577  |
| H  | 0.16867820661856   | 1.74801582484012  | 3.12661156617899  |
| H  | 10.79568915745430  | 1.74736330020621  | 1.56553737591678  |
| H  | 10.51029234247093  | 1.62226916054840  | -2.49483181754772 |
| H  | 10.62399611757949  | -2.45039737466315 | 1.73822860119853  |
| H  | 10.40218060770724  | -2.48098502710994 | -2.39336761220163 |
| H  | -10.61771825209807 | 2.11382981957816  | 1.76020425761940  |
| H  | -10.44914303749746 | 2.19315498353150  | -2.32071562891870 |

|   |                    |                   |                   |
|---|--------------------|-------------------|-------------------|
| H | -10.76521397218507 | -2.07770003053863 | 1.61176169104862  |
| H | -10.53109673535598 | -1.92227272684059 | -2.51109629602244 |
| H | -1.24663555060487  | 0.02192193886186  | 4.05649239955943  |
| H | 2.37004701986180   | -2.05450626287799 | 3.81484846492266  |
| H | 1.15591121883558   | 0.58023310048205  | 4.10726920018600  |

• TS 2Si-OHCH<sub>2</sub> → 2Si...CH<sub>3</sub>OH

|    |                   |                   |                   |
|----|-------------------|-------------------|-------------------|
| Si | 1.36651411440191  | 8.03615455561274  | -1.32667502458614 |
| Si | -1.03257851736276 | 8.06951485526140  | -1.32508390096527 |
| Si | -2.23974728116846 | 6.03189643409008  | -1.31867015817167 |
| Si | -4.60350049854000 | 6.23221336991001  | -1.33862924793852 |
| Si | -5.66419741322734 | 4.10948425376413  | -1.32465351688982 |
| Si | -8.03073116610703 | 4.17470609718301  | -1.35092781037012 |
| Si | -9.22301025126330 | 2.10012062231475  | -1.35130559846230 |
| Si | 2.53555388982095  | 5.97015199554135  | -1.31287056817067 |
| Si | -1.05991208541790 | 3.98631643847777  | -1.29960518023701 |
| Si | -4.51492395361801 | 2.04301352831112  | -1.29915842651856 |
| Si | -8.00718863409560 | 0.06750081217248  | -1.33428199487756 |
| Si | 4.90102571341033  | 6.08913120276368  | -1.32935324534935 |
| Si | 1.28818552912946  | 3.95980397590841  | -1.27991130156136 |
| Si | -2.16991327467789 | 1.92092154516585  | -1.28930963123328 |
| Si | -5.65241477120010 | -0.00299366170670 | -1.32678038363664 |
| Si | -9.30830314115226 | -1.90235495536664 | -1.34623998236042 |
| Si | -8.03024698529827 | -3.91860515540208 | -1.33713772194463 |
| Si | -4.30240710730252 | -1.89827800045292 | -1.58113205086124 |
| Si | -1.14245220164893 | -0.20302288502912 | -1.34853687597783 |
| Si | 2.21712630052830  | 1.78985385929216  | -1.38003749697601 |
| Si | 5.80108274400230  | 3.89578773617898  | -1.32021002409741 |
| Si | 4.56667937227653  | 1.87441912093322  | -1.32512960204987 |
| Si | 1.16081646147015  | -0.23119497630618 | -1.74014533963892 |
| Si | -2.20390003055306 | -1.93606983391653 | -2.49142281745547 |
| Si | -5.66375015624846 | -3.78884194822730 | -1.33450884841046 |
| Si | 8.17009873263560  | 3.83607164435306  | -1.30740034791353 |
| Si | 9.27858449038709  | 1.71406030724032  | -1.29852135155343 |
| Si | 5.62376205161553  | -0.22065327737109 | -1.32580870563869 |
| Si | 2.18068760712440  | -2.06073505602776 | -2.57631948668993 |
| Si | -1.26337868237525 | -3.73300478508474 | -1.37559036432048 |
| Si | -4.69226641881885 | -5.94211846502822 | -1.32914042675273 |
| Si | 7.98053874613971  | -0.26373993157673 | -1.30730416631656 |
| Si | 4.17935629263057  | -2.07836174142550 | -1.36824902403795 |
| Si | 1.10125188463794  | -3.73759009053430 | -1.35515484948711 |
| Si | -2.33251590870021 | -5.82771036272621 | -1.33085498091670 |
| Si | 9.20899204451922  | -2.28025487555866 | -1.29655736691809 |

|    |                   |                   |                   |
|----|-------------------|-------------------|-------------------|
| Si | 5.49164706464324  | -4.04155070515979 | -1.31808120863604 |
| Si | 2.07648930982266  | -5.89162912593734 | -1.32176782472932 |
| Si | -1.36034841150654 | -7.97962752632308 | -1.33384700869633 |
| Si | 7.85052754755008  | -4.24646796438279 | -1.30195322670629 |
| Si | 4.42892030225264  | -6.15065766935967 | -1.31653123123209 |
| Si | 1.02004012798986  | -8.00411886419117 | -1.32936532846949 |
| Si | 1.36565124828240  | 8.05224668321905  | 1.07759605673972  |
| Si | -1.03491965402729 | 8.07740214083555  | 1.08045016338897  |
| Si | -2.24690409380756 | 6.03907419559202  | 1.08776557453770  |
| Si | -4.61336820365997 | 6.24130939612963  | 1.08973042185027  |
| Si | -5.68603611671648 | 4.12339485022089  | 1.07668279552511  |
| Si | -8.05187241980264 | 4.18504313838721  | 1.05627190527787  |
| Si | -9.23998337219205 | 2.10589392860492  | 1.05399305265027  |
| Si | 2.53627603778053  | 5.99085877216984  | 1.09040345794397  |
| Si | -1.06395174178902 | 3.99002274046217  | 1.10258860942186  |
| Si | -4.54418868937489 | 2.05589556232824  | 1.09292990923684  |
| Si | -8.02701424500932 | 0.07004977208132  | 1.06694465715330  |
| Si | 4.90114849739499  | 6.09489345251803  | 1.09631001672880  |
| Si | 1.28758838164662  | 3.98505944846269  | 1.11688005133929  |
| Si | -2.20397254278646 | 1.93194431842590  | 1.11700389609570  |
| Si | -5.67111240668557 | 0.00099114475122  | 1.10381850705307  |
| Si | -9.32522454318978 | -1.90306692691049 | 1.05716189115485  |
| Si | -8.04828482732475 | -3.92169037489037 | 1.06088383189644  |
| Si | -4.33136222566129 | -1.90371541437460 | 1.36110480281146  |
| Si | -1.21481337189007 | -0.20182108874255 | 1.08267990722300  |
| Si | 2.21439820453957  | 1.82630370335844  | 1.05181599713031  |
| Si | 5.79089154184221  | 3.89719173290981  | 1.08215598531214  |
| Si | 4.56085869785372  | 1.87727253821202  | 1.06577465771697  |
| Si | 1.04437864976703  | -0.08272772904325 | 1.70059147217210  |
| Si | -2.21748542460540 | -1.94851606659607 | 2.23726821407905  |
| Si | -5.68293617091862 | -3.79687378486735 | 1.08909480132386  |
| Si | 8.15934803431319  | 3.83785967165427  | 1.09920426183412  |
| Si | 9.26610623668379  | 1.71643395741999  | 1.10643837703486  |
| Si | 5.60879044085848  | -0.21977233772839 | 1.08006025049751  |
| Si | 2.18592247891066  | -2.12333674195338 | 2.35093482273174  |
| Si | -1.27842847407226 | -3.73381551191286 | 1.10001814970544  |
| Si | -4.70043853367966 | -5.94655023133234 | 1.07036935209861  |
| Si | 7.96570643398129  | -0.26022730169297 | 1.09761713259417  |
| Si | 4.15486706151947  | -2.06556023688374 | 1.10568545651047  |
| Si | 1.08189540851823  | -3.73465107718363 | 1.07897578543551  |
| Si | -2.34020960175706 | -5.83054903055299 | 1.07611126208215  |
| Si | 9.19440943932548  | -2.27671813130710 | 1.10825427822803  |
| Si | 5.47335270252916  | -4.02344952681816 | 1.08141309452904  |
| Si | 2.06335565819967  | -5.88641377598478 | 1.07444533146846  |

|    |                    |                   |                   |
|----|--------------------|-------------------|-------------------|
| Si | -1.36848558853132  | -7.98300333302895 | 1.06897290825434  |
| Si | 7.83327277792426   | -4.23969340951956 | 1.10002679646964  |
| Si | 4.41494351526856   | -6.13577507567010 | 1.09262086904679  |
| Si | 1.01215151332118   | -8.00241367957183 | 1.07586824000174  |
| H  | -1.57459482016424  | 9.19855757361867  | 1.91621999416149  |
| H  | -1.57651901311691  | 9.18251059709794  | -2.16861094254870 |
| H  | 5.54232879837199   | 7.12177016068874  | -2.20542787375082 |
| H  | 8.88467884765711   | 4.84988034306491  | -2.14891904290151 |
| H  | 8.42862249864124   | -5.34774630148105 | -2.13852732675018 |
| H  | 4.99922834514951   | -7.21271019707439 | -2.20822820971468 |
| H  | 1.62412840219128   | -9.07333867526890 | -2.18856631104275 |
| H  | -2.00894685738041  | -9.01444362307523 | -2.20220653500188 |
| H  | -5.34056132510110  | -6.93669046683115 | -2.24234960265613 |
| H  | -8.61540623936648  | -5.01086226737337 | -2.17917481779055 |
| H  | -8.69107981964066  | 5.21113428031717  | -2.20856839359009 |
| H  | -5.19696251043426  | 7.29156606501105  | -2.21671654054006 |
| H  | -5.21260054629237  | 7.30723371159344  | 1.95605177820995  |
| H  | -8.73443402305501  | 5.22493889414208  | 1.89214194360472  |
| H  | -8.65037205353883  | -5.01367515098034 | 1.89133332696390  |
| H  | -5.34264938301937  | -6.95275786406836 | 1.97534487151412  |
| H  | -2.01995830144593  | -9.02156414867487 | 1.93091162167033  |
| H  | 1.61749275449110   | -9.06669684172425 | 1.94051845905469  |
| H  | 4.98499450058155   | -7.18335752412411 | 2.00169128942983  |
| H  | 8.39052668821792   | -5.34214510498774 | 1.94954117349046  |
| H  | 8.86047822475160   | 4.85511842819759  | 1.94795666349124  |
| H  | 5.56318793341505   | 7.11565369519906  | 1.97107290107356  |
| H  | 1.93904436852350   | 9.13238931528361  | -2.17331441329179 |
| H  | 1.93327534967313   | 9.16192570138305  | 1.91000709240786  |
| C  | 0.54575286251588   | 0.50832187099441  | 3.81600837771029  |
| O  | -0.41475412997840  | -0.29265432534360 | 4.43243063789161  |
| H  | 0.05519066253346   | 1.42988776009078  | 3.45301833364906  |
| H  | 10.49680861081139  | 1.72279708026102  | 1.96212078576138  |
| H  | 10.51960000937433  | 1.72448412626035  | -2.13900126580681 |
| H  | 10.40324351398396  | -2.36814029858758 | 1.98926923619256  |
| H  | 10.43059575957649  | -2.37587746177440 | -2.15924605208887 |
| H  | -10.48329016915539 | 2.15650326277658  | 1.88951033617008  |
| H  | -10.45447030976292 | 2.14219081125307  | -2.20451766032270 |
| H  | -10.54418715077502 | -1.95607294346757 | 1.92638476648504  |
| H  | -10.51479701208146 | -1.94887872266815 | -2.23288432999391 |
| H  | -0.00436190346716  | -1.14956987832401 | 4.67092300266243  |
| H  | 1.43833497536450   | -0.61169214571683 | 3.22552100472822  |
| H  | 1.40488731226618   | 0.78504940575458  | 4.46035536493835  |

• TS 2Si-CH<sub>3</sub>OH + H<sub>2</sub> → 2Si-CH<sub>3</sub>OH-H<sub>2</sub>

|    |                   |                   |                   |
|----|-------------------|-------------------|-------------------|
| Si | 1.33119368074380  | 7.99291996675450  | -1.24090782420703 |
| Si | -1.07044295224533 | 7.99885582435272  | -1.22551790836641 |
| Si | -2.24886234506396 | 5.94469565310501  | -1.24289214971425 |
| Si | -4.60582022980438 | 5.91535574368920  | -1.19395209231563 |
| Si | -5.37224040445929 | 3.65555821646799  | -1.18060817272718 |
| Si | -7.72031925926134 | 4.02068729688413  | -1.20218371858968 |
| Si | -9.08970603378581 | 2.07176839182168  | -1.27030717553840 |
| Si | 2.46966735204836  | 5.91235804387637  | -1.27227368320709 |
| Si | -1.13958754243083 | 3.86498965948923  | -1.25798789534515 |
| Si | -4.44583832575653 | 1.99512024363288  | -2.57642705192816 |
| Si | -7.81943984479628 | 0.07688296719101  | -1.31784615278474 |
| Si | 4.84334187782714  | 6.00251401663435  | -1.29659575806502 |
| Si | 1.21295103048040  | 3.90390084127530  | -1.28502978861211 |
| Si | -2.45731325206388 | 1.89690435860757  | -1.32967890055441 |
| Si | -5.45458989324676 | 0.25680972296128  | -1.36375485821662 |
| Si | -9.18354255195377 | -1.85406163018920 | -1.36045010798149 |
| Si | -8.02942196619354 | -3.93792348944251 | -1.36553303734350 |
| Si | -4.38150774799816 | -1.84541462223429 | -1.59528150655862 |
| Si | -1.21102388276451 | -0.12533803199096 | -1.37077099416335 |
| Si | 2.24299145636962  | 1.79819271242250  | -1.31533171546584 |
| Si | 5.80982164578892  | 3.83256565976780  | -1.29827207777643 |
| Si | 4.58589389154591  | 1.81100707678817  | -1.30578830941199 |
| Si | 1.15195118321906  | -0.27227209360475 | -1.38719396225667 |
| Si | -2.24045138671520 | -1.93588537856816 | -2.35339732447997 |
| Si | -5.67250046157102 | -3.79154060321505 | -1.38102567025261 |
| Si | 8.17753278388514  | 3.79934536782944  | -1.30799442515859 |
| Si | 9.28767300316746  | 1.67849072327197  | -1.32241407336046 |
| Si | 5.64583757250708  | -0.27600187934615 | -1.33788926411501 |
| Si | 2.14760169038877  | -2.05659219396233 | -2.47395589071345 |
| Si | -1.24399523278673 | -3.76945531785118 | -1.36458769144496 |
| Si | -4.68276893633341 | -5.93719186365092 | -1.38194317649006 |
| Si | 8.00003627185519  | -0.30982661849875 | -1.32799876423193 |
| Si | 4.21420410258620  | -2.12719516432854 | -1.44330358179034 |
| Si | 1.11715669341238  | -3.81289456886240 | -1.38573559193502 |
| Si | -2.32495307412066 | -5.85303838500005 | -1.35887221026775 |
| Si | 9.22957238214214  | -2.32638492462043 | -1.34615956083438 |
| Si | 5.51340077386902  | -4.08024758277180 | -1.34660377997590 |
| Si | 2.08998467884046  | -5.95595664265642 | -1.34995910563311 |
| Si | -1.36337376623776 | -8.00890073976312 | -1.36959899597717 |
| Si | 7.87328677630284  | -4.29222180682008 | -1.35116620970112 |
| Si | 4.44361909607982  | -6.18714168125571 | -1.35879278342997 |
| Si | 1.01691104268267  | -8.06053449214655 | -1.36731413501722 |

|    |                   |                   |                   |
|----|-------------------|-------------------|-------------------|
| Si | 1.34975996315125  | 7.97213147204854  | 1.16233410532837  |
| Si | -1.04909528748396 | 7.98029794234802  | 1.18239043608705  |
| Si | -2.22657898780891 | 5.92513663923728  | 1.16468861336686  |
| Si | -4.57988456523836 | 5.99011078754094  | 1.21527522637960  |
| Si | -5.48783681935364 | 3.81579469741169  | 1.28765546520086  |
| Si | -7.82799143580420 | 4.02552901407973  | 1.18956003022050  |
| Si | -9.11408771888551 | 2.02935490134940  | 1.13151205274347  |
| Si | 2.48951251215727  | 5.89453151655188  | 1.13265335402134  |
| Si | -1.09393194783808 | 3.86648249707774  | 1.14156792490516  |
| Si | -4.41560471314852 | 1.90316511635534  | 1.98545288224305  |
| Si | -7.85757980191741 | 0.03139131210552  | 1.07947409445444  |
| Si | 4.86020251949113  | 5.98794504688755  | 1.13059927136213  |
| Si | 1.24937996160478  | 3.88106805062414  | 1.11460904172517  |
| Si | -2.28569947952562 | 1.85324229070778  | 1.11111681043425  |
| Si | -5.51345542258192 | 0.07345296981126  | 1.09841991157392  |
| Si | -9.21680072992792 | -1.89405424080908 | 1.04273939806445  |
| Si | -8.02913978104724 | -3.95415345818440 | 1.03280125743438  |
| Si | -4.27714823757373 | -1.91993785562860 | 1.25724826249456  |
| Si | -1.19819141419532 | -0.23779157961209 | 1.05208198801585  |
| Si | 2.25449133107251  | 1.76652193104743  | 1.09941785324229  |
| Si | 5.81860103538633  | 3.81571451020593  | 1.10314024295704  |
| Si | 4.59673904648618  | 1.79134588658010  | 1.08866051906744  |
| Si | 1.16640610878816  | -0.30647372108848 | 1.11848469461770  |
| Si | -2.19099044343568 | -1.97983949023984 | 2.23672620681077  |
| Si | -5.66678218793756 | -3.80186694065439 | 1.04002883851917  |
| Si | 8.18569841110383  | 3.78274896194474  | 1.10138213367279  |
| Si | 9.29624041044755  | 1.66287317383729  | 1.08294430490662  |
| Si | 5.65314568105427  | -0.29673961967307 | 1.09292219838419  |
| Si | 2.14728197964686  | -2.08990015383054 | 2.22105973065843  |
| Si | -1.24742885177242 | -3.77454074559011 | 1.10336453801739  |
| Si | -4.69361463899665 | -5.95503632965825 | 1.02187896273830  |
| Si | 8.00761787110225  | -0.32543619119384 | 1.07390112713812  |
| Si | 4.21540944223256  | -2.14734044524429 | 1.18374066282954  |
| Si | 1.11801011009617  | -3.83475385608538 | 1.10976613856570  |
| Si | -2.33260139705486 | -5.86470865637302 | 1.04866162250780  |
| Si | 9.23702788694825  | -2.34165692831217 | 1.05808503603317  |
| Si | 5.51874024192361  | -4.09783933592397 | 1.06202716694590  |
| Si | 2.09566882640249  | -5.97415809724438 | 1.05102762911735  |
| Si | -1.36760953875975 | -8.02033739057343 | 1.03536466086016  |
| Si | 7.87959427219778  | -4.30723570326931 | 1.04889820210590  |
| Si | 4.44993028303863  | -6.20644967522655 | 1.04488556223171  |
| Si | 1.01451894730396  | -8.07383971044622 | 1.03588561225879  |
| H  | -1.59751007375565 | 9.07400136702138  | 2.04903645605346  |
| H  | -1.62326835840268 | 9.12168183089392  | -2.05046299548157 |



|   |                    |                   |                   |
|---|--------------------|-------------------|-------------------|
| H | 5.48993289115214   | 7.03985232053101  | -2.16352843672476 |
| H | 8.88988495117279   | 4.81500978466754  | -2.14897170733418 |
| H | 8.42731297906023   | -5.39643910103939 | -2.19953621161703 |
| H | 5.02137634042433   | -7.21769933171171 | -2.28062574770779 |
| H | 1.62065197906998   | -9.12114932498456 | -2.23675347873286 |
| H | -2.01640241678373  | -9.03966238102614 | -2.23915698444923 |
| H | -5.31725690440114  | -6.94050628638750 | -2.29591218561596 |
| H | -8.64250067913601  | -5.00196530568715 | -2.22320774756340 |
| H | -8.21190770792324  | 5.15833148200482  | -2.04408505906445 |
| H | -5.38046633798798  | 6.85634577852344  | -2.06511715605979 |
| H | -5.28467935276951  | 6.98096523842678  | 2.09009405876245  |
| H | -8.39483776454628  | 5.13407004245234  | 2.02223857276666  |
| H | -8.61868064091296  | -5.03536656092850 | 1.88571154232226  |
| H | -5.35520497762349  | -6.96414021020224 | 1.91001553520352  |
| H | -2.01413369885614  | -9.06615800237491 | 1.89206271053484  |
| H | 1.61043085800351   | -9.14977187688118 | 1.89198428929741  |
| H | 5.03268037498887   | -7.25272685619076 | 1.94571861434093  |
| H | 8.44073842556633   | -5.42114659388006 | 1.87984939025438  |
| H | 8.89906002714786   | 4.78906027587440  | 1.95277258457301  |
| H | 5.51052889401057   | 7.01724689482278  | 2.00445820167206  |
| H | 1.89362581609294   | 9.10308547999840  | -2.07591616175411 |
| H | 1.92535613851550   | 9.06194486600323  | 2.01517593826803  |
| H | 10.53783103953948  | 1.66129309718788  | 1.92280798498796  |
| H | 10.52349356300347  | 1.68752875835552  | -2.17057834298510 |
| H | 10.45063710390949  | -2.44448702413649 | 1.93051225246330  |
| H | 10.43726760527939  | -2.41809099796017 | -2.22790599066640 |
| H | -10.32293809792479 | 2.03317642954852  | 2.01782966657261  |
| H | -10.30460421163362 | 2.16943073302208  | -2.14226381815097 |
| H | -10.43905081451988 | -1.87933439019860 | 1.90956389686117  |
| H | -10.39441213463537 | -1.82864433008027 | -2.24272902299340 |
| C | -1.36599260443932  | 0.90154336040379  | 4.63474688890256  |
| O | -2.66902564982791  | 0.28316718926747  | 4.58837986315599  |
| H | -1.52135838801125  | 1.96710186932698  | 4.86156540932374  |
| H | -2.61818275406743  | -0.55864757384340 | 4.04113085041224  |
| H | -0.84475040926316  | 0.80466547736994  | 3.66480280090962  |
| H | -0.76631946176155  | 0.43358948529735  | 5.43284960951949  |
| H | -4.36024319533393  | 1.71385874886260  | 3.84154593730623  |
| H | -3.69004126992165  | 1.13058324871619  | 4.08653914813421  |

• **TS 2Si-CH<sub>3</sub>OH-H<sub>2</sub> → 2Si-CH<sub>3</sub>-H-H<sub>2</sub>O**

|    |                   |                  |                   |
|----|-------------------|------------------|-------------------|
| Si | 1.24143294209489  | 7.99255572987381 | -1.23666446335390 |
| Si | -1.14973830726087 | 7.95632256851060 | -1.27618629982821 |
| Si | -2.28030351448558 | 5.88277057061647 | -1.35332975593711 |

|    |                   |                   |                   |
|----|-------------------|-------------------|-------------------|
| Si | -4.63224880924814 | 5.91746223442698  | -1.37793224349884 |
| Si | -5.41987178590080 | 3.68742391737998  | -1.38216447617896 |
| Si | -7.76844030801578 | 4.01343036364415  | -1.38477765205049 |
| Si | -9.11127826066166 | 2.04825200355438  | -1.41404497973542 |
| Si | 2.31922427132948  | 5.88652927799734  | -1.23296667399455 |
| Si | -1.25922530828554 | 3.77516059916991  | -1.42245332467882 |
| Si | -4.54887371810318 | 1.93635832445231  | -2.68805442663745 |
| Si | -7.85108829253585 | 0.05143751087849  | -1.41076011156610 |
| Si | 4.68894635044542  | 5.97499138943761  | -1.18939216568899 |
| Si | 1.07906024649677  | 3.86755026383536  | -1.31489722302214 |
| Si | -2.43368370498434 | 1.87392689355776  | -1.92580318917063 |
| Si | -5.49447106838236 | 0.19441190021632  | -1.43962179565661 |
| Si | -9.26209574147021 | -1.84047610298857 | -1.45818303870112 |
| Si | -8.16199299739385 | -3.95047685587552 | -1.47790599461087 |
| Si | -4.46473684400216 | -1.92010447557449 | -1.50867221950797 |
| Si | -1.33349997369458 | -0.09436742492616 | -1.32383079392080 |
| Si | 2.08716134176785  | 1.76220734447412  | -1.26684620756084 |
| Si | 5.66357952177024  | 3.81500201617813  | -1.16122384885585 |
| Si | 4.42661133971734  | 1.80606199165676  | -1.20898119014152 |
| Si | 1.01844161668480  | -0.30612682366198 | -1.35713100253872 |
| Si | -2.32307061574314 | -1.92443360416780 | -2.31715496074768 |
| Si | -5.80248465253853 | -3.84055648884023 | -1.48141768054923 |
| Si | 8.02966839525771  | 3.81761696857327  | -1.12424869878573 |
| Si | 9.15275856370303  | 1.70801899340382  | -1.11800139507317 |
| Si | 5.50257463084308  | -0.26533181990676 | -1.22166319107563 |
| Si | 2.05448606017180  | -2.04642496251981 | -2.48824920391092 |
| Si | -1.29251278475243 | -3.81337967713655 | -1.51262485379113 |
| Si | -4.78564979776239 | -5.97032253807267 | -1.49965089601490 |
| Si | 7.85526435948041  | -0.27167489204966 | -1.15932678561135 |
| Si | 4.08001047198287  | -2.11813532061202 | -1.36208963470949 |
| Si | 1.05779444164569  | -3.84528747878630 | -1.43558386055315 |
| Si | -2.42352762802521 | -5.86889073683856 | -1.48401715022313 |
| Si | 9.10654810868437  | -2.27319813070745 | -1.16414556265444 |
| Si | 5.40900174959963  | -4.05486380705185 | -1.26796736843726 |
| Si | 2.03329318450261  | -5.98562187329111 | -1.38862449698170 |
| Si | -1.44284346572056 | -8.01721599728962 | -1.48131117924382 |
| Si | 7.77052072292113  | -4.24986299161185 | -1.21812272417753 |
| Si | 4.38850862575590  | -6.18535274157828 | -1.33007200491349 |
| Si | 0.93955215878771  | -8.07743972100373 | -1.43888505071857 |
| Si | 1.19980378115717  | 7.96343938264095  | 1.16851535329281  |
| Si | -1.18880546682341 | 7.90199895564291  | 1.13077237463270  |
| Si | -2.29379911662291 | 5.80931261918121  | 1.05052077682779  |
| Si | -4.64746820774219 | 5.90594892180187  | 1.02867064067553  |
| Si | -5.45567332574739 | 3.68985169541734  | 1.03093903874019  |

|    |                   |                   |                   |
|----|-------------------|-------------------|-------------------|
| Si | -7.79587117281255 | 3.99320439119616  | 1.01095468288399  |
| Si | -9.12895367017439 | 2.02538389994063  | 0.98766201658505  |
| Si | 2.26055448494270  | 5.85047644720311  | 1.16819176968319  |
| Si | -1.34531666167979 | 3.65177588771001  | 1.04955268514879  |
| Si | -4.47311943947443 | 1.88852221405188  | 2.15713248400942  |
| Si | -7.85999174229204 | 0.03135285086795  | 0.98980639037816  |
| Si | 4.62832831745632  | 5.94716916512599  | 1.23933135238085  |
| Si | 0.99983544684426  | 3.84683245013620  | 1.07286515445499  |
| Si | -2.12075190526318 | 1.84238061673676  | 2.28330371722278  |
| Si | -5.49855151606269 | 0.13210579775233  | 0.97403915614300  |
| Si | -9.26938980944996 | -1.86341737899601 | 0.94500588417831  |
| Si | -8.15992026780980 | -3.97037046813824 | 0.92109338797850  |
| Si | -4.41082006177400 | -1.96124899237874 | 1.00317362376511  |
| Si | -1.41584867433586 | -0.08108897129138 | 1.11735218021916  |
| Si | 2.03119155558448  | 1.74650528412847  | 1.17281528818600  |
| Si | 5.61730657230504  | 3.79453851874507  | 1.23756805399612  |
| Si | 4.37496890884475  | 1.78551194899295  | 1.19939459415510  |
| Si | 0.94953587256014  | -0.32530631671910 | 1.15476651047768  |
| Si | -2.35644266101375 | -2.02265208047455 | 2.06537703165495  |
| Si | -5.79994773364067 | -3.85387539816747 | 0.93786659948276  |
| Si | 7.98256043501484  | 3.79649922409422  | 1.28607022129951  |
| Si | 9.10429415608355  | 1.68430947824342  | 1.28707545614366  |
| Si | 5.45333208051396  | -0.28952431764443 | 1.21770409165993  |
| Si | 1.94072702081216  | -2.11967173214969 | 2.23899391872211  |
| Si | -1.35301656272036 | -3.79166825971771 | 0.97772083908849  |
| Si | -4.80182097991979 | -5.99407034341133 | 0.90326493327729  |
| Si | 7.80925889595995  | -0.29785356446991 | 1.24085742714688  |
| Si | 4.03119500572999  | -2.15174996104426 | 1.23895995745869  |
| Si | 0.99838695444883  | -3.86591946837517 | 1.05206750765560  |
| Si | -2.44021500049672 | -5.87435896696965 | 0.93111144444388  |
| Si | 9.05681272139059  | -2.30316419381151 | 1.24020320717015  |
| Si | 5.36023979219212  | -4.08953119927730 | 1.13616128977385  |
| Si | 1.97757644876368  | -6.00557136116535 | 1.00892724352705  |
| Si | -1.48018001502787 | -8.03337794945057 | 0.92091759066664  |
| Si | 7.72063951260078  | -4.28095464972137 | 1.18180837976593  |
| Si | 4.33151038951226  | -6.21625820605722 | 1.07461258293558  |
| Si | 0.89837687678956  | -8.10630689411374 | 0.96430598725742  |
| H  | -1.81520618797247 | 8.95650045583305  | 1.99256539768385  |
| H  | -1.72726433100168 | 9.06170399070353  | -2.10765217682155 |
| H  | 5.36158832230784  | 7.00912059909285  | -2.04069163978773 |
| H  | 8.73966012778628  | 4.84531163844013  | -1.95237097545351 |
| H  | 8.35419399951526  | -5.34228762296012 | -2.06196057814304 |
| H  | 5.01914848329039  | -7.19384772896493 | -2.24194932568412 |
| H  | 1.54382875632015  | -9.14063800820442 | -2.30488400126961 |

|   |                    |                   |                   |
|---|--------------------|-------------------|-------------------|
| H | -2.07258508712109  | -9.05325377045782 | -2.36203773956122 |
| H | -5.39256780549576  | -6.98003673155699 | -2.42564792601785 |
| H | -8.78910058679367  | -4.99431963882633 | -2.35067613135335 |
| H | -8.29038356663998  | 5.13899237532205  | -2.22548720339545 |
| H | -5.32750447938290  | 6.88641768186141  | -2.28377996004847 |
| H | -5.34712278395290  | 6.88566003937025  | 1.91968724803916  |
| H | -8.31956159459250  | 5.11253225884627  | 1.85792699747381  |
| H | -8.78443853611163  | -5.03223683611601 | 1.77482744567746  |
| H | -5.41797786264983  | -7.03769483321739 | 1.78541422347136  |
| H | -2.16050731173313  | -9.06818353456434 | 1.76485567490562  |
| H | 1.47738169894230   | -9.18732846632230 | 1.82557531101637  |
| H | 4.89969526453388   | -7.26044046157894 | 1.98767779028660  |
| H | 8.27208586558517   | -5.39433673309298 | 2.02014525220719  |
| H | 8.66583788411053   | 4.80588254051971  | 2.15826757812993  |
| H | 5.23758731073176   | 6.98066465852360  | 2.13780143727504  |
| H | 1.83380724641018   | 9.08557631157597  | -2.07342334058085 |
| H | 1.76546980826174   | 9.03891035063821  | 2.04538100889131  |
| H | 10.32334401429640  | 1.67999919842373  | 2.15917478615054  |
| H | 10.40515934064313  | 1.71402363592653  | -1.94110212261004 |
| H | 10.24958795300001  | -2.39932437603698 | 2.14185206677194  |
| H | 10.33510729977298  | -2.33643290834610 | -2.01913231486332 |
| H | -10.34867547368402 | 2.06541750008536  | 1.85908493631403  |
| H | -10.32062478079360 | 2.10730095276607  | -2.29805976014109 |
| H | -10.49505327787820 | -1.83162439334111 | 1.80800417809696  |
| H | -10.47676296981032 | -1.77715997124926 | -2.33383629111471 |
| H | -5.04710874533376  | 1.82157319224611  | 3.54699847071062  |
| H | -2.07746602398490  | -2.01047905507910 | 4.28427420228103  |
| C | -1.89352248170449  | 0.10637068196765  | 4.55625367727811  |
| O | -1.97945937602427  | -1.53776028150806 | 5.21391296507496  |
| H | -0.97193448105592  | -0.03561405581143 | 3.99121787333443  |
| H | -1.83463832333508  | 0.72495617847098  | 5.45748109680021  |
| H | -2.83085911839534  | 0.11657814901249  | 3.99826272296262  |
| H | -2.86275561335952  | -1.65476810580262 | 5.63041279587536  |

• TS 2Si-CH<sub>3</sub>-H → 2Si<sup>⋯</sup>CH<sub>4</sub>

|    |                   |                  |                   |
|----|-------------------|------------------|-------------------|
| Si | 1.11813837129537  | 7.83871755126941 | -1.18566552392434 |
| Si | -1.26492037233890 | 7.74964361824767 | -1.35154282370505 |
| Si | -2.14004805965043 | 5.56152386702012 | -1.62864895496325 |
| Si | -4.50166669201107 | 5.86002975763312 | -1.69813031099001 |
| Si | -5.63130253901255 | 3.87815665431627 | -2.21223274526889 |
| Si | -7.91232853516907 | 3.96421861433051 | -1.58339045286594 |
| Si | -9.21920633298132 | 1.99706462458922 | -1.47344132223512 |
| Si | 2.14869770955319  | 5.70991954810529 | -1.15791256594235 |

|    |                   |                   |                   |
|----|-------------------|-------------------|-------------------|
| Si | -1.19342226458434 | 3.70807347311853  | -2.78812216335276 |
| Si | -4.45931084509784 | 2.25468444241888  | -1.08614835443899 |
| Si | -7.85822253126119 | 0.08975271166535  | -1.23255740993271 |
| Si | 4.49932301401129  | 5.92304783332099  | -0.96510435947761 |
| Si | 0.74399403064560  | 3.81291900210498  | -1.39647394716012 |
| Si | -2.08533182222161 | 2.36981321271496  | -1.02791947007238 |
| Si | -5.54821266897444 | 0.20014305982655  | -0.88367352303943 |
| Si | -9.25501628600923 | -1.79676218050715 | -1.52896023755027 |
| Si | -8.13552158672062 | -3.88305860944312 | -1.56043595274950 |
| Si | -4.40846070475513 | -1.81654991317176 | -1.16419742167210 |
| Si | -1.42936543507235 | 0.07044781676864  | -0.97080504327962 |
| Si | 1.97667610832902  | 1.81786046470067  | -1.18747707709080 |
| Si | 5.56476046439669  | 3.81039181509721  | -0.95613948769157 |
| Si | 4.31469823885726  | 1.82178007961628  | -1.11422212435006 |
| Si | 0.92102511355464  | -0.24986355326391 | -1.08924986031847 |
| Si | -2.36376941958237 | -1.69380452661078 | -2.17630935994548 |
| Si | -5.79830734066199 | -3.69450124406603 | -1.32797032822840 |
| Si | 7.92530294976108  | 3.84614212503337  | -0.86843906939745 |
| Si | 9.04467614768542  | 1.73825664511759  | -0.89463425991738 |
| Si | 5.37477724306560  | -0.25585492726716 | -1.12941558955723 |
| Si | 1.84843479958049  | -1.99014148556054 | -2.32452840153723 |
| Si | -1.42442504197667 | -3.62202183243814 | -1.28791436451719 |
| Si | -4.83386663557385 | -5.83848575083493 | -1.52696057008492 |
| Si | 7.72753315662938  | -0.22783130321059 | -1.01907376732449 |
| Si | 3.96742135913842  | -2.09958327416143 | -1.42112468071553 |
| Si | 0.91856075768229  | -3.78666226524894 | -1.20965319621076 |
| Si | -2.48505882518755 | -5.71658532123587 | -1.46254384706008 |
| Si | 8.97036100654017  | -2.23447053672058 | -1.04410087826495 |
| Si | 5.28618587217648  | -4.04089263358070 | -1.22684868785031 |
| Si | 1.89502122772424  | -5.91754726649185 | -1.30750989805922 |
| Si | -1.53741770305587 | -7.88156804495437 | -1.60745450843583 |
| Si | 7.64970767996190  | -4.21757748017357 | -1.17451770844991 |
| Si | 4.24479748687808  | -6.15696018705859 | -1.30537311033138 |
| Si | 0.83315956094502  | -8.01047131216976 | -1.49987093722367 |
| Si | 0.98375288647287  | 7.79682428465814  | 1.21071764102167  |
| Si | -1.37569806843933 | 7.62342989666562  | 1.04317748660445  |
| Si | -2.31028445493908 | 5.47822096347880  | 0.78428869219826  |
| Si | -4.62955196105576 | 5.57225016965536  | 0.69231411673500  |
| Si | -5.33380896644495 | 3.33111847626872  | 0.91406907957559  |
| Si | -7.64629492906941 | 3.72675169341938  | 0.77133774240659  |
| Si | -9.26658175873805 | 2.00137076093375  | 0.92870889906470  |
| Si | 1.97558868450206  | 5.65417539205592  | 1.23053712304911  |
| Si | -1.59993825279550 | 3.31668403352560  | 1.17854651886856  |
| Si | -4.85435766183304 | 1.80904254473517  | 2.62578575036318  |

|    |                   |                   |                   |
|----|-------------------|-------------------|-------------------|
| Si | -8.14987028886309 | -0.06382150944510 | 1.14674130865156  |
| Si | 4.33464097025353  | 5.80898584624317  | 1.45324900169913  |
| Si | 0.67751732688262  | 3.68282054173840  | 1.03923817509289  |
| Si | -2.49687649486025 | 1.51809810355029  | 2.27402842829196  |
| Si | -5.79135680761524 | -0.04202315630506 | 1.49627524546396  |
| Si | -9.51863978682518 | -1.95888455525058 | 0.85507113435649  |
| Si | -8.33696159000931 | -4.03571966807207 | 0.82726395733380  |
| Si | -4.60328069999760 | -2.07488418108440 | 1.38261694366642  |
| Si | -1.50484682867790 | -0.41894156913366 | 1.40796629709413  |
| Si | 1.87195684915203  | 1.69728019449926  | 1.26403932344334  |
| Si | 5.45694595402642  | 3.72882876102011  | 1.43779265670518  |
| Si | 4.20954263524063  | 1.73486313511168  | 1.29378604932974  |
| Si | 0.86648670060581  | -0.41985606429634 | 1.37765708296678  |
| Si | -2.54101299735550 | -2.22168674642411 | 2.41353438156686  |
| Si | -5.98537201808366 | -3.94628323686446 | 1.06690635059108  |
| Si | 7.82230532631379  | 3.76554536771926  | 1.53995397847476  |
| Si | 8.94438397945052  | 1.65467962456006  | 1.50710041003251  |
| Si | 5.27683775657556  | -0.34710221665766 | 1.31807132265245  |
| Si | 1.85007342049621  | -2.21354394422427 | 2.49143076037870  |
| Si | -1.49433059791633 | -3.88645916891768 | 1.22837660741063  |
| Si | -4.95690558572934 | -6.06137039761557 | 0.86014257095828  |
| Si | 7.63055549636883  | -0.31037029645634 | 1.37590709122326  |
| Si | 3.91468630251169  | -2.23199054136598 | 1.49474065300987  |
| Si | 0.86821741123989  | -3.92296735580235 | 1.23765852445253  |
| Si | -2.59292912228350 | -5.93034548686377 | 0.93876789057094  |
| Si | 8.86813042837350  | -2.32490722612197 | 1.35578461390327  |
| Si | 5.21718115291162  | -4.15240574278603 | 1.17687447569728  |
| Si | 1.83019608785926  | -6.07816992047447 | 1.08559372076216  |
| Si | -1.64856295775689 | -8.08459737142093 | 0.78368332962486  |
| Si | 7.57763848530705  | -4.32986362025137 | 1.22171782061120  |
| Si | 4.18715864574819  | -6.28107249104561 | 1.09417928902626  |
| Si | 0.73170529915925  | -8.16536456238374 | 0.89763470608050  |
| H  | -2.19147375330553 | 8.51680506235642  | 1.92639985075871  |
| H  | -1.86131700621824 | 8.87623187136690  | -2.13974131802047 |
| H  | 5.16389166304117  | 7.01884722782293  | -1.74224086160250 |
| H  | 8.64216828793380  | 4.90105537926916  | -1.65472225138760 |
| H  | 8.24102944018073  | -5.28190733394091 | -2.04772643947969 |
| H  | 4.82319350179586  | -7.15876656850588 | -2.25760878086609 |
| H  | 1.46357936369803  | -9.01971433987329 | -2.41018267941369 |
| H  | -2.18483110018609 | -8.81469968310229 | -2.58494042110204 |
| H  | -5.46566658479710 | -6.71751453810360 | -2.56294062273893 |
| H  | -8.63573673893447 | -4.88945220916383 | -2.55009195051356 |
| H  | -8.56805029553094 | 5.19514204098202  | -2.12322279105061 |
| H  | -5.13069782796254 | 7.06983977167996  | -2.31709780286153 |

|   |                    |                   |                   |
|---|--------------------|-------------------|-------------------|
| H | -5.41223922767817  | 6.50925544167159  | 1.56007741603515  |
| H | -7.96432110005291  | 4.91772318178954  | 1.62323041135522  |
| H | -9.04656650341681  | -5.13839621424546 | 1.55228383271963  |
| H | -5.55307836479510  | -7.19418534045963 | 1.63868653216535  |
| H | -2.34271907588372  | -9.18857125271146 | 1.52197783818581  |
| H | 1.26576088463747   | -9.30302605133809 | 1.71401377759882  |
| H | 4.82045091544391   | -7.32152956500030 | 1.96711268503838  |
| H | 8.14570867451557   | -5.45944206250895 | 2.02592724193116  |
| H | 8.48022846204271   | 4.74960697407840  | 2.45916873395718  |
| H | 4.81259835213918   | 6.84880809748737  | 2.42183888664516  |
| H | 1.76591817436021   | 8.92783565282586  | -1.98548460784580 |
| H | 1.48724470655272   | 8.83912098688659  | 2.16280294407568  |
| H | 10.14257865466220  | 1.61591395366773  | 2.40661582321928  |
| H | 10.31572553703386  | 1.74742208644120  | -1.68821272059210 |
| H | 10.04195443617725  | -2.42535907880538 | 2.28139533194883  |
| H | 10.21779936509405  | -2.27664993038000 | -1.87272413338839 |
| H | -10.42390574214957 | 2.41179263460594  | 1.78942614175284  |
| H | -10.37189741232376 | 1.83595978504803  | -2.41430122833543 |
| H | -10.82501078996403 | -2.03640907191262 | 1.58542851318642  |
| H | -10.36126387019053 | -1.61456285255765 | -2.52254026763523 |
| H | -3.26489519228240  | 1.72012132924006  | 3.76162328757039  |
| C | -1.90442049933355  | 1.51390137411934  | 4.31107054119247  |
| H | -0.84128924365999  | 1.61632024916148  | 4.02022966908947  |
| H | -2.14145504834326  | 2.34093490179451  | 5.00233508067169  |
| H | -2.07072529897542  | 0.53187759089332  | 4.78006494190885  |

### 3.2 Hydrogen absorption on silicene bilflake

- $2\text{Si}\cdots\text{H}_2$

|    |                   |                  |                   |
|----|-------------------|------------------|-------------------|
| Si | 1.23732224811668  | 8.10533243554521 | -1.21733534606177 |
| Si | -1.15728729332012 | 8.10736306552778 | -1.21588738189839 |
| Si | -2.31866246239462 | 6.04283427380300 | -1.21843427029408 |
| Si | -4.67976953936703 | 6.24608611562479 | -1.20221502601716 |
| Si | -5.64645382803291 | 4.08286568340448 | -1.18152207129997 |
| Si | -8.01669756053733 | 4.08368959745094 | -1.15754811791922 |
| Si | -9.19663077161085 | 1.99829680333464 | -1.15456409436992 |
| Si | 2.39829197147822  | 6.04227455332083 | -1.21439175295126 |
| Si | -1.13923542533561 | 3.98806871426589 | -1.21924213948781 |
| Si | -4.43053266974311 | 2.05085168061868 | -1.16492485822864 |
| Si | -7.93310134730904 | 0.00027287839191 | -1.16461295087847 |
| Si | 4.75698245033831  | 6.25278847395738 | -1.24491959138050 |
| Si | 1.20818836273096  | 4.00225088744397 | -1.21223881037646 |

|    |                   |                   |                   |
|----|-------------------|-------------------|-------------------|
| Si | -2.07634036234554 | 1.82142950352506  | -1.24030242552059 |
| Si | -5.57935321537803 | 0.00021385595807  | -1.19223672423779 |
| Si | -9.19680453405087 | -1.99760809285947 | -1.15465464506646 |
| Si | -8.01734247815453 | -4.08324529380325 | -1.15780385320357 |
| Si | -4.43096679307740 | -2.05078138459481 | -1.16490562039357 |
| Si | -1.20891682890647 | 0.00003737135603  | -2.45809243992235 |
| Si | 2.16936393413570  | 1.86499042577090  | -1.24106687580661 |
| Si | 5.72154560245429  | 4.08938203957896  | -1.24641156410676 |
| Si | 4.51653856678452  | 2.04743400637885  | -1.26816776394944 |
| Si | 0.95173638090551  | -0.00000411728185 | -1.86022072610343 |
| Si | -2.07667738861561 | -1.82147345450751 | -1.24066616304265 |
| Si | -5.64709419064478 | -4.08276126187287 | -1.18180994982020 |
| Si | 8.09323316575093  | 4.08215969475973  | -1.26581972267377 |
| Si | 9.27355807358503  | 1.99790854313966  | -1.27459325012570 |
| Si | 5.66024693902244  | -0.00007513474922 | -1.25387268085299 |
| Si | 2.16940748656771  | -1.86490692439697 | -1.24068863143580 |
| Si | -1.13947029508272 | -3.98813833842185 | -1.21941879242885 |
| Si | -4.68027465861723 | -6.24593756288813 | -1.20267074323479 |
| Si | 8.01204366799033  | -0.00015248593661 | -1.26862465398342 |
| Si | 4.51645392542599  | -2.04742949735886 | -1.26820115308857 |
| Si | 1.20795915110223  | -4.00199802989293 | -1.21234203931667 |
| Si | -2.31919310427779 | -6.04273935771607 | -1.21887091538516 |
| Si | 9.27346547372549  | -1.99827842254626 | -1.27467344447743 |
| Si | 5.72129624908100  | -4.08943850537024 | -1.24646436713921 |
| Si | 2.39794266410196  | -6.04203968547133 | -1.21458833213387 |
| Si | -1.15774721840961 | -8.10724500692688 | -1.21639109654646 |
| Si | 8.09296904676550  | -4.08244127013300 | -1.26592934345492 |
| Si | 4.75662100561084  | -6.25278185008524 | -1.24498528021512 |
| Si | 1.23686414668644  | -8.10500712013369 | -1.21766668753998 |
| Si | 1.24726561378253  | 8.10641809781796  | 1.18963888628878  |
| Si | -1.14706688773284 | 8.10300938225289  | 1.19122088286951  |
| Si | -2.30553228738202 | 6.03896293644459  | 1.18543820049046  |
| Si | -4.66374397480169 | 6.24988740444388  | 1.21813315412579  |
| Si | -5.62888960495957 | 4.08684053656933  | 1.22123751567092  |
| Si | -8.00022721797392 | 4.08132260029308  | 1.24408149109341  |
| Si | -9.18260204855402 | 1.99862076255344  | 1.25232194268046  |
| Si | 2.40953834578877  | 6.04257131986513  | 1.18969834703872  |
| Si | -1.11567523300013 | 3.99965071360828  | 1.17892965378651  |
| Si | -4.42402616619131 | 2.04476547349449  | 1.23973464838804  |
| Si | -7.92251369159520 | 0.00023607649576  | 1.24378842875790  |
| Si | 4.77060751997901  | 6.24702312674709  | 1.17519379482989  |
| Si | 1.23195923731596  | 3.98674645571959  | 1.18605447069713  |
| Si | -2.07853300448230 | 1.86302352133102  | 1.20429113912438  |
| Si | -5.57158440795658 | 0.00038166175088  | 1.22109646100296  |



|    |                   |                   |                   |
|----|-------------------|-------------------|-------------------|
| Si | -9.18268656816183 | -1.99806745117607 | 1.25223458859426  |
| Si | -8.00095152045073 | -4.08106703457199 | 1.24378700201531  |
| Si | -4.42507567944494 | -2.04470935339185 | 1.23973920692578  |
| Si | -0.85358492961775 | -0.00046178680644 | 1.81657852828950  |
| Si | 2.16527357437566  | 1.81814239269498  | 1.20670174460592  |
| Si | 5.73634272793941  | 4.08356350842526  | 1.15676942931643  |
| Si | 4.51975735644744  | 2.05188148577472  | 1.13583713192356  |
| Si | 1.30305604080341  | 0.00007329390700  | 2.43369161299629  |
| Si | -2.07936861762250 | -1.86352145178113 | 1.20384169060086  |
| Si | -5.62961101335497 | -4.08701109832236 | 1.22093948432927  |
| Si | 8.10672511501268  | 4.08293152327239  | 1.13571877437994  |
| Si | 9.28481717805037  | 1.99658872114153  | 1.13234634293189  |
| Si | 5.66605879946846  | -0.00021009738713 | 1.16023525769853  |
| Si | 2.16513430234959  | -1.81804948467728 | 1.20704158690798  |
| Si | -1.11581569874369 | -3.99993133615851 | 1.17876846821859  |
| Si | -4.66422481224322 | -6.24991469272505 | 1.21772770027188  |
| Si | 8.01926181669671  | -0.00019749589446 | 1.13955536882408  |
| Si | 4.51950893992246  | -2.05214382789832 | 1.13583660670399  |
| Si | 1.23177935675900  | -3.98646664677460 | 1.18596001101467  |
| Si | -2.30609311939487 | -6.03896399024173 | 1.18501137393584  |
| Si | 9.28472174856896  | -1.99706823171538 | 1.13225970121840  |
| Si | 5.73610845429798  | -4.08379217107104 | 1.15669045422420  |
| Si | 2.40906724502389  | -6.04250482878279 | 1.18950540663440  |
| Si | -1.14765471023150 | -8.10305498103284 | 1.19068308916531  |
| Si | 8.10648237342572  | -4.08334733046824 | 1.13559666873362  |
| Si | 4.77016083639881  | -6.24720883739669 | 1.17509693920737  |
| Si | 1.24669908130094  | -8.10629275054834 | 1.18929143410888  |
| H  | -1.71951901861425 | 9.19916153233171  | 2.03816252926261  |
| H  | -1.72183768855617 | 9.21341050540285  | -2.05526643024688 |
| H  | 5.35914693215428  | 7.29736134350588  | -2.13442561078180 |
| H  | 8.76647265549942  | 5.11646120247129  | -2.11636776924533 |
| H  | 8.76602517096729  | -5.11675759464971 | -2.11659592160528 |
| H  | 5.35848625257468  | -7.29745828752387 | -2.13455908699834 |
| H  | 1.80836957899176  | -9.20324063523508 | -2.06239870948161 |
| H  | -1.72204461230054 | -9.21327336091021 | -2.05595713432678 |
| H  | -5.30912221510564 | -7.28504214961422 | -2.07998163606408 |
| H  | -8.70536586643743 | -5.11999248900422 | -1.99329440881432 |
| H  | -8.70438213920850 | 5.12077023659156  | -1.99297446980012 |
| H  | -5.30850348794961 | 7.28519878472321  | -2.07959441302323 |
| H  | -5.26471940302885 | 7.29399709988892  | 2.10915007038271  |
| H  | -8.67101921058719 | 5.11552451474456  | 2.09670027584734  |
| H  | -8.67186497786980 | -5.11525973634904 | 2.09630137341422  |
| H  | -5.26519113346340 | -7.29415830426513 | 2.10858523028148  |
| H  | -1.72013611761822 | -9.19924310574423 | 2.03753763699465  |

|   |                    |                   |                   |
|---|--------------------|-------------------|-------------------|
| H | 1.81119736205845   | -9.21131139400363 | 2.02995365662583  |
| H | 5.39732336192005   | -7.28662878358675 | 2.05329069667006  |
| H | 8.79286398556196   | -5.11952764742249 | 1.97307982185141  |
| H | 8.79308533387250   | 5.11909522994498  | 1.97325013503879  |
| H | 5.39784385659178   | 7.28641764533762  | 2.05338395498074  |
| H | 1.80868842196010   | 9.20362866179219  | -2.06208037148940 |
| H | 1.81188938202419   | 9.21132397704745  | 2.03037639217237  |
| H | 10.51967555240288  | 2.03638418011785  | 1.98100594542497  |
| H | 10.49868695662330  | 2.03831175767056  | -2.13724268652168 |
| H | 10.51956600041200  | -2.03690248988718 | 1.98093795973676  |
| H | 10.49857473394937  | -2.03871334378678 | -2.13735229679522 |
| H | -10.40683026233815 | 2.03752044761564  | 2.11626475675254  |
| H | -10.43240689639231 | 2.04090339717976  | -2.00169128726342 |
| H | -10.43269246943151 | -2.03996890579862 | -2.00163308210257 |
| H | -10.40695208868864 | -2.03692595504769 | 2.11613518642337  |
| H | -3.86994617840512  | 0.00125913316030  | 3.94656756556489  |
| H | -3.17120478852970  | -0.00232938868819 | 4.24490380288346  |

- **2Si-H<sub>2</sub>**

|    |                   |                   |                   |
|----|-------------------|-------------------|-------------------|
| Si | 1.19332742280452  | 8.10938252889066  | -1.21090810860316 |
| Si | -1.19996851988154 | 8.10699550801378  | -1.21585211215382 |
| Si | -2.36182754624658 | 6.04347966699921  | -1.22077762037743 |
| Si | -4.71918663833648 | 6.26117771084795  | -1.22663244785196 |
| Si | -5.66347926248392 | 4.08741584001972  | -1.22132826928397 |
| Si | -8.03340537482654 | 4.07938732081263  | -1.21632239435132 |
| Si | -9.20997876669884 | 1.99335553035157  | -1.22083570833845 |
| Si | 2.34813700165073  | 6.04341547840509  | -1.20095449198726 |
| Si | -1.19911918430910 | 3.98043452588232  | -1.21046909299413 |
| Si | -4.44918130101272 | 2.05352248834382  | -1.20430047308805 |
| Si | -7.94159274587698 | -0.00005781817729 | -1.22336455766132 |
| Si | 4.70594886103531  | 6.25840562525713  | -1.21724451099861 |
| Si | 1.14865469644057  | 4.00706106076135  | -1.19710566657069 |
| Si | -2.09458193823457 | 1.79429222843202  | -1.23098083734013 |
| Si | -5.58822827081309 | -0.00050495511880 | -1.23588352140103 |
| Si | -9.20997244739771 | -1.99346252889338 | -1.22078925073795 |
| Si | -8.03301582965126 | -4.07934265188744 | -1.21617208835099 |
| Si | -4.44817786642718 | -2.05406243084886 | -1.20394196960509 |
| Si | -1.23159006279087 | 0.00043837316250  | -2.48425336310657 |
| Si | 2.11842196339280  | 1.86733194142327  | -1.21581845799542 |
| Si | 5.66910096263774  | 4.09554646406206  | -1.21071806527306 |
| Si | 4.47378313840938  | 2.04877841942639  | -1.20320803305860 |
| Si | 0.92762278073740  | 0.00056407623937  | -1.87144657430024 |
| Si | -2.09360924875573 | -1.79390370391605 | -1.23127324569291 |

|    |                   |                   |                   |
|----|-------------------|-------------------|-------------------|
| Si | -5.66311713475517 | -4.08757003396858 | -1.22116658971139 |
| Si | 8.04108900337201  | 4.08231071083105  | -1.21965657868897 |
| Si | 9.22617870083324  | 2.00129358341659  | -1.22332107915419 |
| Si | 5.61733435822648  | -0.00017212249699 | -1.21592947216986 |
| Si | 2.11760677849985  | -1.86685059361920 | -1.21619284060812 |
| Si | -1.19932153635638 | -3.98041930769154 | -1.21035917978244 |
| Si | -4.71885114133433 | -6.26138813576217 | -1.22642959639278 |
| Si | 7.96903540184429  | 0.00011752550028  | -1.22077524043027 |
| Si | 4.47291557770921  | -2.04867060509175 | -1.20335666429109 |
| Si | 1.14844527277975  | -4.00686787646094 | -1.19715278401577 |
| Si | -2.36146859374210 | -6.04377030101097 | -1.22087704235213 |
| Si | 9.22599819979171  | -2.00116804653702 | -1.22359731603639 |
| Si | 5.66843490476323  | -4.09529458008605 | -1.21118044092315 |
| Si | 2.34753479268928  | -6.04339753575012 | -1.20126031901981 |
| Si | -1.19997709666883 | -8.10747836802392 | -1.21586037518701 |
| Si | 8.04040693815661  | -4.08200631808468 | -1.22019583291913 |
| Si | 4.70538161280400  | -6.25819748648930 | -1.21761405905410 |
| Si | 1.19326788189248  | -8.10972842120963 | -1.21100948014319 |
| Si | 1.19216821575598  | 8.11476728895653  | 1.19630844034295  |
| Si | -1.20147230876003 | 8.10791947246781  | 1.18957377087865  |
| Si | -2.36328224911529 | 6.04512382993275  | 1.18364057828900  |
| Si | -4.71960334344921 | 6.26415850133600  | 1.19130036269892  |
| Si | -5.66155611056069 | 4.09028130913041  | 1.18013292592421  |
| Si | -8.03247992614680 | 4.07737318632122  | 1.18429683323954  |
| Si | -9.21008528917068 | 1.99294098686702  | 1.18646808114250  |
| Si | 2.34807124964441  | 6.04841641123292  | 1.20286044127716  |
| Si | -1.19497878555873 | 3.98705861048606  | 1.18843552843003  |
| Si | -4.45440246796667 | 2.05120374393364  | 1.20121879309234  |
| Si | -7.94260257532915 | -0.00002138249779 | 1.18432634853167  |
| Si | 4.70759460615919  | 6.25787313106351  | 1.20536946383880  |
| Si | 1.15564411490339  | 4.00298508031097  | 1.19950605657516  |
| Si | -2.10739973310299 | 1.81706090527796  | 1.19997742583486  |
| Si | -5.59054049132695 | -0.00029982063530 | 1.18480516141924  |
| Si | -9.21007666403035 | -1.99295309047386 | 1.18650479702542  |
| Si | -8.03207707702633 | -4.07719948397587 | 1.18440674685992  |
| Si | -4.45372639496180 | -2.05142164186716 | 1.20149476208856  |
| Si | -1.16411202093612 | 0.00039740747611  | 2.35200032432932  |
| Si | 2.12524098930143  | 1.85277349631196  | 1.22149082862216  |
| Si | 5.67572452332692  | 4.09667248749927  | 1.19152933494265  |
| Si | 4.47836658005216  | 2.05455560247217  | 1.19632967817377  |
| Si | 1.20229403402787  | 0.00043652200609  | 2.34281279610194  |
| Si | -2.10676103827847 | -1.81639836681580 | 1.19976089542096  |
| Si | -5.66117311425619 | -4.09035286658323 | 1.18022467034395  |
| Si | 8.04690057598807  | 4.08467870682368  | 1.18246713997079  |

|    |                   |                   |                   |
|----|-------------------|-------------------|-------------------|
| Si | 9.23004882092297  | 2.00154098583307  | 1.18399135385515  |
| Si | 5.61919632781658  | -0.00023563751483 | 1.19370305563293  |
| Si | 2.12438155415572  | -1.85238586336696 | 1.22135177785723  |
| Si | -1.19525630260276 | -3.98688233222782 | 1.18861454369556  |
| Si | -4.71931158345675 | -6.26437688817925 | 1.19144313464981  |
| Si | 7.97227369193190  | -0.00007922190528 | 1.18955263658862  |
| Si | 4.47751720803728  | -2.05456354601606 | 1.19617112062586  |
| Si | 1.15541540749249  | -4.00278496767539 | 1.19948256900559  |
| Si | -2.36289810408940 | -6.04533182314836 | 1.18362208250349  |
| Si | 9.22988330117403  | -2.00176641626213 | 1.18374336344806  |
| Si | 5.67507098298187  | -4.09657537675950 | 1.19110181792928  |
| Si | 2.34762791979668  | -6.04829905600164 | 1.20258888928123  |
| Si | -1.20131487700260 | -8.10828636244439 | 1.18970148113422  |
| Si | 8.04622553324113  | -4.08469930024936 | 1.18197213886811  |
| Si | 4.70711848827597  | -6.25776754179989 | 1.20501300178741  |
| Si | 1.19233609890495  | -8.11505309967314 | 1.19634495716639  |
| H  | -1.77654750512151 | 9.20664379702814  | 2.03171707589630  |
| H  | -1.76563183100749 | 9.20908470629720  | -2.05897298026317 |
| H  | 5.31780881929778  | 7.30189106178478  | -2.10113286270661 |
| H  | 8.71921098805944  | 5.11645163071717  | -2.06648523925136 |
| H  | 8.71826772834398  | -5.11634695974470 | -2.06726777084648 |
| H  | 5.31716594642372  | -7.30182058432895 | -2.10166710633226 |
| H  | 1.77144876405411  | -9.20309815697560 | -2.05768719931395 |
| H  | -1.76591258367716 | -9.20947976823888 | -2.05887177255116 |
| H  | -5.33364863291895 | -7.30256641689323 | -2.11116005598829 |
| H  | -8.71511752389225 | -5.11473395648039 | -2.05859735541341 |
| H  | -8.71552829858590 | 5.11456717999463  | -2.05891235149747 |
| H  | -5.33404521509072 | 7.30272252562693  | -2.11158559006179 |
| H  | -5.33378537278383 | 7.30157124523404  | 2.08105321510023  |
| H  | -8.71007771171928 | 5.11155573197612  | 2.03197680262879  |
| H  | -8.70964232705180 | -5.11163599737829 | 2.03202556696168  |
| H  | -5.33335107511741 | -7.30188570416272 | 2.08140068112142  |
| H  | -1.77644342064935 | -9.20658684750368 | 2.03164323154916  |
| H  | 1.76024152878661  | -9.21641858706058 | 2.03972334786299  |
| H  | 5.32728193762836  | -7.29903550319940 | 2.08546130793531  |
| H  | 8.73102214901960  | -5.12050362739093 | 2.02199309164017  |
| H  | 8.73133958839116  | 5.11978046145077  | 2.02234027700807  |
| H  | 5.32788592186716  | 7.29954717069605  | 2.08593153050421  |
| H  | 1.77123726754585  | 9.20316078740198  | -2.05764489421172 |
| H  | 1.75972680446472  | 9.21600003152698  | 2.03947163787628  |
| H  | 10.46173874408578 | 2.04711547307847  | 2.03637747788995  |
| H  | 10.45475719277302 | 2.04513493540879  | -2.08077752641869 |
| H  | 10.46162534356702 | -2.04758039281310 | 2.03632030007961  |
| H  | 10.45479629119052 | -2.04514234926413 | -2.08131064207014 |

|   |                    |                   |                   |
|---|--------------------|-------------------|-------------------|
| H | -10.43719674703905 | 2.02820171898334  | 2.04618541748844  |
| H | -10.43900908374631 | 2.03175691873926  | -2.07840674893227 |
| H | -10.43919022914834 | -2.03208363367368 | -2.07859151399893 |
| H | -10.43726674524333 | -2.02834736167469 | 2.04645336430393  |
| H | -1.61017850134886  | 0.00008456146378  | 3.78258319679694  |
| H | 1.68225227800901   | 0.00031954375433  | 3.76278972979274  |

• TS 2Si...H<sub>2</sub> → 2Si-H<sub>2</sub>

|    |                   |                   |                   |
|----|-------------------|-------------------|-------------------|
| Si | 1.19657130291223  | 8.09073982666745  | -1.19268095083819 |
| Si | -1.19664865096683 | 8.10331833696556  | -1.20511092184270 |
| Si | -2.35572592521098 | 6.03835524806014  | -1.21938887022091 |
| Si | -4.71449994794638 | 6.24143331009142  | -1.21486895299461 |
| Si | -5.67036840645977 | 4.07235299096742  | -1.20300816547407 |
| Si | -8.04031416222193 | 4.07532319350237  | -1.20404878931106 |
| Si | -9.21988292911025 | 1.99141894844434  | -1.21061142025554 |
| Si | 2.35411148395958  | 6.02712582947237  | -1.18892969360228 |
| Si | -1.17593066791150 | 3.98148489332316  | -1.21754798924264 |
| Si | -4.44200913118999 | 2.04907113105343  | -1.17578493057841 |
| Si | -7.94764499113076 | 0.00000040725406  | -1.20571880243201 |
| Si | 4.70895335614558  | 6.25708985054332  | -1.20795539530272 |
| Si | 1.17291547164995  | 3.98050754799303  | -1.20365266600463 |
| Si | -2.08532801885151 | 1.80123404412412  | -1.25670009204390 |
| Si | -5.59330368184922 | -0.00000107250490 | -1.20746101470896 |
| Si | -9.21987832187533 | -1.99142041649685 | -1.21062061621472 |
| Si | -8.04030452532260 | -4.07532204819105 | -1.20406072526039 |
| Si | -4.44200235650375 | -2.04906930795987 | -1.17577554486990 |
| Si | -1.23346106466709 | -0.00000435497818 | -2.49201772602345 |
| Si | 2.11666994708874  | 1.83853372944707  | -1.24899317412679 |
| Si | 5.66244404373904  | 4.09108549800877  | -1.21042751385705 |
| Si | 4.46277161921884  | 2.04711549599043  | -1.21939761019268 |
| Si | 0.96823791337250  | 0.00000123496276  | -2.00415222726873 |
| Si | -2.08532163744176 | -1.80123272359369 | -1.25668217662072 |
| Si | -5.67035902621683 | -4.07235213360150 | -1.20301000768058 |
| Si | 8.03418385851855  | 4.07765729574486  | -1.22404257202833 |
| Si | 9.21883546716770  | 1.99698870681922  | -1.23033173690157 |
| Si | 5.60605103547972  | 0.00000105793487  | -1.21767661391906 |
| Si | 2.11666805750666  | -1.83853336856736 | -1.24899558501024 |
| Si | -1.17592934738344 | -3.98148474726070 | -1.21752962974460 |
| Si | -4.71449448936231 | -6.24143413141526 | -1.21486806933542 |
| Si | 7.95650569875765  | 0.00000129968622  | -1.23011948332991 |
| Si | 4.46277022324853  | -2.04711239443008 | -1.21939968329540 |
| Si | 1.17291650925630  | -3.98050797047536 | -1.20365530720080 |
| Si | -2.35572072714717 | -6.03835615107713 | -1.21938703375519 |

|    |                   |                   |                   |
|----|-------------------|-------------------|-------------------|
| Si | 9.21883699370407  | -1.99698517055510 | -1.23033065477815 |
| Si | 5.66244487677591  | -4.09108128757073 | -1.21043156658333 |
| Si | 2.35411372483076  | -6.02712521297339 | -1.18892729595953 |
| Si | -1.19664246354685 | -8.10331877084276 | -1.20511064669450 |
| Si | 8.03418484203886  | -4.07765354226070 | -1.22404437050265 |
| Si | 4.70895584134645  | -6.25708663882666 | -1.20795747098129 |
| Si | 1.19657737776348  | -8.09074137542980 | -1.19268074240342 |
| Si | 1.19288962675365  | 8.08746722640532  | 1.21402992669177  |
| Si | -1.20002400005482 | 8.09800843896648  | 1.20099177568962  |
| Si | -2.35612521141063 | 6.03386111088307  | 1.18430005426475  |
| Si | -4.71362669163061 | 6.24653432723613  | 1.20420611268369  |
| Si | -5.67809051452077 | 4.08351316790780  | 1.19868229571127  |
| Si | -8.04916202922631 | 4.07635254498988  | 1.19788688501810  |
| Si | -9.23023138374182 | 1.99362861693707  | 1.19701847865743  |
| Si | 2.35089495499200  | 6.02071261232015  | 1.21378577885853  |
| Si | -1.15764459633682 | 3.99682526943474  | 1.18065248072164  |
| Si | -4.47047380305362 | 2.04572406032258  | 1.23319055779435  |
| Si | -7.96346366013357 | -0.00000434413471 | 1.20244594415350  |
| Si | 4.70917901192968  | 6.24630376630552  | 1.21370671640770  |
| Si | 1.19373556791241  | 3.95033844326997  | 1.19606110498107  |
| Si | -2.12716008080559 | 1.86556536822794  | 1.19133939359430  |
| Si | -5.61173877889401 | -0.00000212967785 | 1.20479045002510  |
| Si | -9.23023214246634 | -1.99363707594185 | 1.19700930477942  |
| Si | -8.04916172510642 | -4.07636017676021 | 1.19787516109120  |
| Si | -4.47047142761990 | -2.04572737881895 | 1.23319884148585  |
| Si | -0.95880288250954 | 0.00000201451858  | 1.96083906905550  |
| Si | 2.11198239664312  | 1.77507095130365  | 1.24266451657981  |
| Si | 5.67080585318165  | 4.08342750107413  | 1.19168421327042  |
| Si | 4.45711354938036  | 2.05250597743984  | 1.17946409018248  |
| Si | 1.36652716513105  | -0.00000107775146 | 2.58703097900257  |
| Si | -2.12715617327443 | -1.86557097427171 | 1.19135925626816  |
| Si | -5.67808971307754 | -4.08351608816798 | 1.19868039858957  |
| Si | 8.04205387882846  | 4.07816383882208  | 1.17757735991555  |
| Si | 9.22340930842694  | 1.99501790982383  | 1.17720106198744  |
| Si | 5.60305044177113  | 0.00000032321689  | 1.19216191413255  |
| Si | 2.11198071726363  | -1.77507165446939 | 1.24266196988499  |
| Si | -1.15764060147291 | -3.99683057205054 | 1.18066959529289  |
| Si | -4.71362428316829 | -6.24653700452971 | 1.20420705513216  |
| Si | 7.95599694865940  | 0.00000111411710  | 1.18098581298840  |
| Si | 4.45711190935343  | -2.05250426805531 | 1.17946185194234  |
| Si | 1.19373978791994  | -3.95034073708726 | 1.19605786588518  |
| Si | -2.35612223362758 | -6.03386623770954 | 1.18430216980287  |
| Si | 9.22340802841900  | -1.99501639397095 | 1.17720192687456  |
| Si | 5.67080523923777  | -4.08342451999093 | 1.19168004924527  |

|    |                    |                   |                   |
|----|--------------------|-------------------|-------------------|
| Si | 2.35089819250454   | -6.02071462599811 | 1.21378855622760  |
| Si | -1.20002167146565  | -8.09801398029812 | 1.20099218237839  |
| Si | 8.04205301818913   | -4.07816232869251 | 1.17757557840912  |
| Si | 4.70918239783782   | -6.24630234309222 | 1.21370410774396  |
| Si | 1.19289251008839   | -8.08746910998576 | 1.21403022699069  |
| H  | -1.777973744469222 | 9.19095556891637  | 2.04814078293053  |
| H  | -1.75663533406349  | 9.20833658284003  | -2.04868201297878 |
| H  | 5.30965054083132   | 7.30783628436817  | -2.09152791678353 |
| H  | 8.70921080966872   | 5.11291058434594  | -2.07223941914373 |
| H  | 8.70921209296036   | -5.11290637134698 | -2.07224150523429 |
| H  | 5.30965093873426   | -7.30783297170700 | -2.09153160486154 |
| H  | 1.77761437715458   | -9.18747724279816 | -2.03284113551967 |
| H  | -1.75663081336830  | -9.20833434982679 | -2.04868419066580 |
| H  | -5.34302762042706  | -7.27622038180057 | -2.09745277249017 |
| H  | -8.71659848923273  | -5.11284734556572 | -2.04804842815308 |
| H  | -8.71661237065611  | 5.11285022223077  | -2.04803098809043 |
| H  | -5.34303365519401  | 7.27622018500765  | -2.09745240956847 |
| H  | -5.31757076460555  | 7.28782004902849  | 2.09649324941503  |
| H  | -8.72905937873761  | 5.11176647543388  | 2.04181841026776  |
| H  | -8.72906079400196  | -5.11177781417410 | 2.04180080352037  |
| H  | -5.31757054129988  | -7.28782213594097 | 2.09649346916937  |
| H  | -1.77796907458782  | -9.19096413750254 | 2.04813901251533  |
| H  | 1.75999401604095   | -9.18639929856634 | 2.06102796759437  |
| H  | 5.32273785490105   | -7.28852606145389 | 2.09844553182715  |
| H  | 8.72512537401696   | -5.11541704207939 | 2.01672654175202  |
| H  | 8.72512731107782   | 5.11541774464919  | 2.01672846973639  |
| H  | 5.32272972848269   | 7.28852932845241  | 2.09844922857258  |
| H  | 1.77760837041463   | 9.18747583084917  | -2.03284103546369 |
| H  | 1.75998985411022   | 9.18639777052090  | 2.06102798713190  |
| H  | 10.45536843002275  | 2.03625348406697  | 2.03008429831284  |
| H  | 10.44615814997289  | 2.04039411317346  | -2.08977108483538 |
| H  | 10.45536647576080  | -2.03625209647419 | 2.03008609055206  |
| H  | 10.44616042276601  | -2.04038977436015 | -2.08976900580983 |
| H  | -10.46125477659444 | 2.03135612949715  | 2.05130743640440  |
| H  | -10.44590393233577 | 2.02792647943014  | -2.07202124076218 |
| H  | -10.44589739156681 | -2.02792969777433 | -2.07203305518107 |
| H  | -10.46125697613274 | -2.03136541419544 | 2.05129608782958  |
| H  | -1.35606352280288  | 0.00001667932196  | 3.60432203455191  |
| H  | -0.36283363960774  | 0.00001200332095  | 3.64659977245726  |

### 3.2 CO<sub>2</sub> chemisorption on silicene monoflakes

- Si...CO<sub>2</sub>

|    |              |             |             |
|----|--------------|-------------|-------------|
| Si | 1.15450000   | -7.70790000 | 0.00310000  |
| Si | -1.01810000  | -7.71330000 | -0.39600000 |
| Si | -2.14570000  | -5.78010000 | -0.00710000 |
| Si | -4.34750000  | -5.77240000 | -0.41420000 |
| Si | -5.46190000  | -3.85670000 | 0.02850000  |
| Si | -7.68550000  | -3.83650000 | -0.32070000 |
| Si | -8.78150000  | -1.92660000 | 0.16370000  |
| Si | -11.01980000 | -1.90470000 | -0.14590000 |
| Si | -12.08920000 | 0.00330000  | 0.31190000  |
| Si | 2.29390000   | -5.79650000 | -0.45190000 |
| Si | -1.03220000  | -3.86350000 | -0.53870000 |
| Si | -4.36660000  | -1.93240000 | -0.50710000 |
| Si | -7.68830000  | -0.00510000 | -0.36890000 |
| Si | -11.01630000 | 1.90270000  | -0.17280000 |
| Si | 4.48010000   | -5.77100000 | 0.02750000  |
| Si | 1.17310000   | -3.85460000 | -0.04720000 |
| Si | -2.13850000  | -1.92650000 | -0.10800000 |
| Si | -5.45260000  | -0.00640000 | 0.00880000  |
| Si | -8.77790000  | 1.92570000  | 0.13590000  |
| Si | -7.68040000  | 3.82710000  | -0.37880000 |
| Si | -4.36680000  | 1.91280000  | -0.53620000 |
| Si | -1.02880000  | -0.01510000 | -0.64560000 |
| Si | 2.30070000   | -1.93910000 | -0.51950000 |
| Si | 5.62750000   | -3.87330000 | -0.40200000 |
| Si | 4.50100000   | -1.93770000 | 0.02010000  |
| Si | 1.16980000   | -0.01360000 | -0.08890000 |
| Si | -2.13650000  | 1.91250000  | -0.16070000 |
| Si | -5.45640000  | 3.84890000  | -0.03190000 |
| Si | 7.82270000   | -3.84900000 | 0.09720000  |
| Si | 8.95640000   | -1.95020000 | -0.34340000 |
| Si | 5.63010000   | -0.02000000 | -0.43320000 |
| Si | 2.30580000   | 1.90610000  | -0.52680000 |
| Si | -1.01870000  | 3.84170000  | -0.58600000 |
| Si | -4.33450000  | 5.75350000  | -0.50120000 |
| Si | 7.83510000   | -0.02110000 | 0.09610000  |
| Si | 4.50520000   | 1.90240000  | 0.01130000  |
| Si | 1.18070000   | 3.82620000  | -0.06980000 |
| Si | -2.13430000  | 5.76380000  | -0.08530000 |
| Si | 8.96030000   | 1.90400000  | -0.35120000 |
| Si | 5.63530000   | 3.83430000  | -0.41830000 |



|    |              |             |             |
|----|--------------|-------------|-------------|
| Si | 2.30720000   | 5.76190000  | -0.48950000 |
| Si | -0.99870000  | 7.69070000  | -0.48150000 |
| Si | 7.83040000   | 3.80720000  | 0.07970000  |
| Si | 4.49180000   | 5.73730000  | -0.00160000 |
| Si | 1.17030000   | 7.68110000  | -0.06220000 |
| Si | 11.17230000  | 1.87950000  | 0.11140000  |
| Si | 11.16850000  | -1.92740000 | 0.11960000  |
| Si | 12.27060000  | -0.02600000 | -0.28650000 |
| H  | 11.90520000  | -3.20150000 | -0.13260000 |
| H  | 13.74840000  | -0.02720000 | -0.07510000 |
| H  | 11.91090000  | 3.15140000  | -0.14620000 |
| H  | 8.57490000   | 5.07660000  | -0.18040000 |
| H  | 5.23990000   | 7.01030000  | -0.23050000 |
| H  | 1.93820000   | 8.94670000  | -0.25600000 |
| H  | -1.75860000  | 8.95330000  | -0.24060000 |
| H  | -5.06650000  | 7.02280000  | -0.20740000 |
| H  | -11.73410000 | 3.17840000  | 0.12200000  |
| H  | -8.40350000  | 5.09670000  | -0.06430000 |
| H  | -13.57800000 | 0.00390000  | 0.20170000  |
| H  | -11.74000000 | -3.17450000 | 0.16750000  |
| H  | -8.41130000  | -5.10030000 | 0.01050000  |
| H  | -5.08210000  | -7.03510000 | -0.09960000 |
| H  | -1.77900000  | -8.97180000 | -0.13730000 |
| H  | 1.91670000   | -8.97790000 | -0.18480000 |
| H  | 5.22470000   | -7.04770000 | -0.19220000 |
| H  | 8.56420000   | -5.12110000 | -0.15850000 |
| C  | -1.73290000  | 0.34010000  | 2.98010000  |
| O  | -0.65960000  | 0.79780000  | 3.09050000  |
| O  | -2.80650000  | -0.12160000 | 2.87890000  |

- **TS Si...CO<sub>2</sub> → Si-CO<sub>2</sub>**

|    |              |             |             |
|----|--------------|-------------|-------------|
| Si | 1.09363600   | -7.67732600 | -0.12362300 |
| Si | -1.07522300  | -7.72704300 | -0.53118200 |
| Si | -2.19277200  | -5.76606400 | -0.26244800 |
| Si | -4.40793200  | -5.80825100 | -0.60125900 |
| Si | -5.48020500  | -3.87603500 | -0.11896500 |
| Si | -7.72797400  | -3.85315100 | -0.25796100 |
| Si | -8.74983300  | -1.93511400 | 0.34011000  |
| Si | -11.00874400 | -1.91299200 | 0.32205300  |
| Si | -12.01189400 | -0.00519500 | 0.90958900  |
| Si | 2.22391800   | -5.78717500 | -0.67779000 |
| Si | -1.09336500  | -3.90710300 | -0.99640800 |
| Si | -4.44482400  | -1.95549900 | -0.78509400 |
| Si | -7.73300000  | -0.01248300 | -0.32317600 |

|    |              |             |             |
|----|--------------|-------------|-------------|
| Si | -11.00669500 | 1.89667800  | 0.30647600  |
| Si | 4.38563800   | -5.73041200 | -0.10954500 |
| Si | 1.10354900   | -3.81454900 | -0.46003900 |
| Si | -2.19312500  | -1.96245700 | -0.59032100 |
| Si | -5.47012700  | -0.01320000 | -0.20018000 |
| Si | -8.74776200  | 1.91658600  | 0.32434500  |
| Si | -7.72390400  | 3.82862300  | -0.28939400 |
| Si | -4.44267000  | 1.92327400  | -0.80053500 |
| Si | -1.10914000  | -0.01892000 | -1.06077200 |
| Si | 2.25588900   | -1.93702700 | -1.02991900 |
| Si | 5.56938300   | -3.85263100 | -0.50788600 |
| Si | 4.38889900   | -1.91770900 | -0.25635400 |
| Si | 1.12242900   | -0.01807600 | -0.45570300 |
| Si | -2.19103500  | 1.92928900  | -0.60506600 |
| Si | -5.47614200  | 3.85018300  | -0.15007000 |
| Si | 7.69362400   | -3.82874300 | 0.23776100  |
| Si | 8.88607500   | -1.94392600 | -0.08118200 |
| Si | 5.58627400   | -0.02083800 | -0.62238100 |
| Si | 2.25774500   | 1.89563900  | -1.04350600 |
| Si | -1.08912100  | 3.86956400  | -1.02573500 |
| Si | -4.40172200  | 5.77739300  | -0.64735400 |
| Si | 7.70286200   | -0.01867600 | 0.18959300  |
| Si | 4.39102300   | 1.88007800  | -0.27071800 |
| Si | 1.10755500   | 3.77880700  | -0.48825700 |
| Si | -2.18673500  | 5.73565800  | -0.30739800 |
| Si | 8.88810500   | 1.90300000  | -0.09722200 |
| Si | 5.57328100   | 3.81177400  | -0.53827900 |
| Si | 2.23003800   | 5.74836500  | -0.72219200 |
| Si | -1.06684700  | 7.69304500  | -0.59204400 |
| Si | 7.69777500   | 3.79162000  | 0.20674700  |
| Si | 4.39183500   | 5.69390200  | -0.15401700 |
| Si | 1.10187800   | 7.64426600  | -0.18362300 |
| Si | 11.01270200  | 1.88002000  | 0.67577200  |
| Si | 11.01066200  | -1.91675000 | 0.69173700  |
| Si | 12.16347000  | -0.02007800 | 0.42553700  |
| H  | 11.76929300  | -3.19544700 | 0.55176000  |
| H  | 13.59360700  | -0.01904600 | 0.85440800  |
| H  | 11.77270000  | 3.15669100  | 0.52514300  |
| H  | 8.44898800   | 5.07621600  | 0.06913200  |
| H  | 5.14211500   | 6.98455700  | -0.20612400 |
| H  | 1.89107700   | 8.90891100  | -0.26651900 |
| H  | -1.81985600  | 8.93311300  | -0.23864400 |
| H  | -5.09760900  | 7.01164000  | -0.16881300 |
| H  | -11.68095200 | 3.17018400  | 0.69709200  |

|   |              |             |             |
|---|--------------|-------------|-------------|
| H | -8.40783500  | 5.08340700  | 0.14959900  |
| H | -13.50192900 | -0.00401900 | 1.00042000  |
| H | -11.68433100 | -3.18258200 | 0.72297600  |
| H | -8.41321600  | -5.10361700 | 0.19117800  |
| H | -5.10485700  | -7.03790500 | -0.11250300 |
| H | -1.82950100  | -8.96326900 | -0.16718700 |
| H | 1.88140600   | -8.94350900 | -0.19596200 |
| H | 5.13451200   | -7.02227100 | -0.15076700 |
| H | 8.44347100   | -5.11522400 | 0.11072800  |
| C | -0.60128000  | -0.00995700 | 1.62363000  |
| O | 0.63794400   | -0.01139700 | 1.48704100  |
| O | -1.51838000  | -0.00652600 | 2.35966100  |
